# Supplementary material for: Hsf1 and the molecular chaperone Hsp90 support a ‘rewiring stress response’ leading to an adaptive cell size increase in chronic stress
Source: eLife. 2023 Dec 7;12:RP88658. doi: 10.7554/eLife.88658 (PMC10703448; doi:10.7554/eLife.88658)
Supplement: Figure 1—figure supplement 1—source data 1. [file elife-88658-fig1-figsupp1-data1.xlsx]

## Sheet: Fig1–FigSuppl1
1A
	HEK293T			A549			RPE1
C	100	100	100	100	100	100	100	100	100
AZC	92.2	93.5	91.2	97.4	91.5	93.2	91.2	92.5	97.4
	HEK293T			A549			RPE1
C	100	100	100	100	100	100	100	100	100
Arsenite	95.2	91.5	93.2	98.4	91.1	96.2	98.2	97.5	98.7
	HEK293T			A549			RPE1
C	100	100	100	100	100	100	100	100	100
TM	91.2	93.1	93.6	99.2	95.3	98.3	99.2	93.1	96.8
1C
	HEK293T			A549			RPE1
	100	100	100	100	100	100	100	100	100
	97	92	96	91	93	92	98	95	93
	A549				HEK293T				RPE1
C	100	100	100		100	100	100	100	100	100	100
Arsenite	128	142	117		141	133	128	139	143	135	158
	A549				HEK293T				RPE1
C	100	100	100		100	100	100		100	100	100
hypoxia	183	158	151		120	133	127		157	148	139
	A549				HEK293T				RPE1
C	100	100	100	100	100	100	100	100	100	100	100
AZC	117	107	113	121	117	133	127	119	128	132	126
	HEK293T				A549				RPE1
C	100	100	100		100	100	100		100	100	100
TM	111	115	117		121	118	129		122	131	119
1D
	HEK293T				A549				RPE1
37°C	12.62	12.75	12.7	12.51	12.33	12.19	12.21	11.83	14.78	14.41	15.25	14.99
HS	14.78	15.82	15.91	16.34	14.83	14.9	15.79	16.52	19.32	19.82	20.9	22.74
37°C	100	100	100	100	100	100	100	100	100	100	100	100
HS	118	124.07	125.27	130.61	120.61	122.23	129.32	139.64	130.71	137.54	137.04	151.7
1F						HEK
		37 to 37				HS				1 week HS to 37
	G1	54.5	54	56.2		53.2	50.4	54.8		54.9	56	54.3
	S	20.9	21.8	22.9		21.2	22.1	20.9		22.7	19.4	20.1
	G2/M	22.2	23.1	19.8		24.2	23.9	21.5		20.1	22.8	21.3
37	12.62	12.75	12.7	12.51	12.33	12.19	12.21	11.83	14.78	14.41	15.25	14.99
HS	14.78	15.82	15.91	16.34	14.83	14.9	15.79	16.52	19.32	19.82	19.25	20.74
