# Supplementary material for: Hsf1 and the molecular chaperone Hsp90 support a ‘rewiring stress response’ leading to an adaptive cell size increase in chronic stress
Source: eLife. 2023 Dec 7;12:RP88658. doi: 10.7554/eLife.88658 (PMC10703448; doi:10.7554/eLife.88658)
Supplement: Figure 1—source data 1. [file elife-88658-fig1-data1.xlsx]

## Sheet: Fig. 1
1A
	HEK293T				A549				RPE1				HCT
37°C	100	100	100	100	100	100	100	100	100	100	100	100	100	100	100	100
HS	98.66	99.1	93.7	94.4	91.4	91.9	93.5	92.2	92.1	91.4	93.5	88.4	91.2	95	91.2	93.7
1B
	HEK293T								A549								RPE1								HCT116
37°C	100	100	100	100	100	100	100	100	100	100	100	100	100	100	100	100	100	100	100	100	100				100	100	100	100
HS	110	107	119	109	130	127	133	121	131	135	117	133	109	129	127	131	203	188	207	221	181				121	111	121	127
1C					HEK										A549
		37				HS						37				HS
	G1	54.8	50.4	53		53.2	50.4	54.8				79.2	78.6	77.9		85.4	86.1	84.3
	S	22.4	24.6	24.6		21.2	22.1	20.9				7.01	7.6	6.81		5.41	6.1	5.9
	G2/M	22.5	23.8	21.1		24.2	23.9	21.5				11.6	11.9	10.2		6.2	6.3	5.8
1D
								HEK
	37				1 day HS				4 day Hs				1 week HS
G1	54.3	55.5	54.2		78.7	74.3	78.9		64.8	69.2	66.7		50.4	54.6	58.1
S	21.1	20.1	18.7		10.1	11.3	9.2		14.3	13.2	12.4		24.1	20.3	18.1
G2/M	23.2	22.5	21.2		9.2	12.1	11.3		12.7	13.9	11.7		22.6	24.8	21.4
								A549
	37				1 day HS				4 day Hs				1 week HS
G1	79.2	78.6	76.8		89.9	89.5	90.2		86.9	85.5	86.8		83.4	86.1	84.3
S	7.01	8.51	7.9		4.08	3.23	3.1		5.37	4.97	5.3		5.41	6.1	5.9
G2/M	11.6	10.9	10.2		3.52	4.41	3.3		5.1	6.22	6.11		6.2	6.3	5.8
1E
		1 day HS				4 day HS				1 week HS
	HEK	3	14	9	2	33	35	29	38	41	52	39	43
	A549	1	10	8	14	72	44	53	63	78	52	61	79
1F
							HEK
	37					39
	44.8	53.5	48.9	56.8	51.2	40.3	55.2	46.5	53.1	54.3
							A549
	37					40
	18	17.8	16.5	17.8	16.9	14.6	14.3	13.4	16.6	16.6
1G
							A549
Days	37 °C						39 °C						39 °C (1 week adapted)
1	1	1	1	1	1	1	1	1	1	1	1	1	1	1	1	1	1	1
2	4.3	2.2	4.5	2.1	5.9	1.8	3.8	2.3	2.2	2.6	1.9	1.8	2.9	3.6	2.8	3.2	1.9	2.4
3	9.4	10.2	9.3	10.9	8.8	9.2	8.2	8.8	7.3	7.8	9.3	9.3	9.1	12.3	12.5	9.8	13.2	11.4
4	18.3	22.3	21.3	28.1	31.6	34.9	14.6	23.2	22.9	21.4	19.3	16.2	26.3	28.6	29.2	16.3	19.9	15.9
							RPE1
	37 °C						39 °C						39 °C (1 week adapted)
1	1	1	1	1	1	1	1	1	1	1	1	1	1	1	1	1	1	1
2	1.9	1.5	2.1	3.2	1.8	1.4	2.1	1.8	2.3	2.8	3.1	1.2	1.3	1.5	2.1	1.6	1.7	2.1
3	6.4	6.1	6.8	5.3	4.2	4.6	4.8	6.1	5.9	6.9	8.3	4.1	3.9	4.8	3.8	4.7	5.1	4.8
4	14.2	16.2	11.9	10.8	16.4	11.9	9.6	12.3	10.1	10.2	16.4	8.6	8.3	8.9	9.3	10.2	10.4	10.1
1H
		A549				HEK
	Before HS	100	100	100		100	100	100
	1 week HS	132	143	144		117	121	117
	recovery	105	108	101		103	100	101
1I						A549
		37				HS				Recovery
	G1	76.2	75.3	77.8		85.9	87.5	89.2		77.1	76.9	78.2
	S	6.31	7.35	6.81		4.97	3.23	3.1		8.7	6.9	7.3
	G2/M	10.8	12.3	11.1		6.22	5.41	4.8		9.9	12.8	11.2
