# Supplementary material for: Hsf1 and the molecular chaperone Hsp90 support a ‘rewiring stress response’ leading to an adaptive cell size increase in chronic stress
Source: eLife. 2023 Dec 7;12:RP88658. doi: 10.7554/eLife.88658 (PMC10703448; doi:10.7554/eLife.88658)
Supplement: Figure 2—figure supplement 1—source data 1. [file elife-88658-fig2-figsupp1-data1.xlsx]

## Sheet: Fig2–FigSuppl1
A								HEK Hypoxia
Days	WT					alpha KO					beta KO
1	2.3	1.9	3.3			1.3	1.9	0.99			1.9	0.98	2.1
4	9.2	8.1	7.8			31.8	44.1	38.9			52.4	64.2	68.2
								HEK Arsenite treatment
Days	WT					alpha KO					beta KO
1	2.3	1.9	3.3			1.3	1.9	0.99			1.9	0.98	2.1
4	5.2	4.3	6.8			33.9	41.2	37.2			41.2	44.6	48.3
B
	HEK WT				HEK alpha KO				HEK beta KO				A549 WT				A549 alpha KO				A549 Beta KO
control	100	100	100	100	100	100	100	100	100	100	100	100	100	100	100	100	100	100	100	100	100	100	100	100
Hypoxia	115	118	121	125	133	143	123	141	131	125	142	121	144	146	141	143	167	151	172	136	151	135	144	149
	HEK WT				HEK alpha KO				HEK beta KO				A549 WT				A549 alpha KO				A549 Beta KO
Control	100	100	100	100	100	100	100	100	100	100	100	100	100	100	100	100	100	100	100	100	100	100	100	100
Arsenite	112	110	121	125	133	117	123	131	131	120	142	121	117	132	116	138	129	143	149	136	152	119	148	151
D
		HEK WT Nucleaus size			HEK WT total size				HEK alpha KO Nucleaus size			HEK alpha KO total size				HEK beta KO Nucleaus size			HEK beta KO total size
	Control	1	1	1	1	1	1		1	1	1	1	1	1		1	1	1	1	1	1
	HS	1.3892	1.38973	1.29836	1.64537	1.36458	1.62674		1.29729	1.18626	1.49848	1.59838	1.23765	1.48635		1.53683	1.28374	1.22639	1.44685	1.74764	1.22838
