# Supplementary material for: Hsf1 and the molecular chaperone Hsp90 support a ‘rewiring stress response’ leading to an adaptive cell size increase in chronic stress
Source: eLife. 2023 Dec 7;12:RP88658. doi: 10.7554/eLife.88658 (PMC10703448; doi:10.7554/eLife.88658)
Supplement: Figure 2—source data 2. [file elife-88658-fig2-data2.xlsx]

## Sheet: Fig. 2
2B								HEK
	WT					alpha KO					beta KO
1	99.4	98.7	98.3	99.1	98.2	99.2	98.2	99.6	98.2	98.2	99.4	98.2	99.1	99.3	98.3
2	98.2	99.4	98.3	99.2	97.1	98.3	99.2	94.8	97.2	98.5	98.3	99.2	94.1	93.2	97.2
4	98.7	96.3	96.2	97.9	97.5	81.3	77.2	74.2	68.4	66.2	71.2	82.1	68.5	63.2	77.4
7	99	95.4	96.2	98.9	97.2	58	49.44	47.61	51.12	48.1	45.01	58.9	68.2	62.1	59.3
								A549
	WT					alpha KO					beta KO
1	98.2	99.1	99.4	98.7	97.4	99.2	98.3	99.1	99.5	97.3	99.1	97.3	99.8	96.2	99.3
2	98.5	99.3	98.2	97.6	97.4	98.4	97.2	95.3	99.2	98.1	97.3	98.4	99.2	93.2	98.2
4	95.2	97.3	96.2	98.2	93.5	77.3	79.1	68.9	72.3	68.4	82.4	84.2	73.2	72.4	77.2
7	95.2	91.3	92.1	95.2	91.6	48.3	51.2	42.9	48.2	43.8	68.2	62.3	58.3	63.2	55.3
2C							HEK
	WT				alpha KO				beta KO
	100	104	103	101	100	100	99.1	99.3	99	101	98	102
	115	118	121	125	115	117	121	129	131	119	138	127
	123	127	121	128	142	121	131	137	143	123	141	131
							A549
	WT				alpha KO				beta KO
	101	100	97	99	100	100	100	100	100	100	100	100
	147	141	153	142	163	165	152	139	144	151	162	153
	164	156	161	163	177	181	172	156	171	165	144	159
2E
		A549WT Nucleaus size			A549 WT total size				A549 alpha KO Nucleaus size			A549 alpha KO Nucleaus size				A549 beta KO Nucleaus size			A549 beta KO Nucleaus size
	Control	1	1	1	1	1	1		1	1	1	1	1	1		1	1	1	1	1	1
	HS	2.07524	2.12791	1.97753	2.14603	2.11187	2.24221		1.43373	1.91803	2.05814	1.94773	2.06122	2.12583		1.77071	2.10606	2.09091	1.97826	2.03527	2.06499
