# Supplementary material for: Hsf1 and the molecular chaperone Hsp90 support a ‘rewiring stress response’ leading to an adaptive cell size increase in chronic stress
Source: eLife. 2023 Dec 7;12:RP88658. doi: 10.7554/eLife.88658 (PMC10703448; doi:10.7554/eLife.88658)
Supplement: Figure 3—figure supplement 1—source data 1. [file elife-88658-fig3-figsupp1-data1.xlsx]

## Sheet: Fig3–FigSuppl1
B
									HEK
	Cell only					GFP+empty vector					WT HSF1					Mutant HSF1
	1	1	1			1.167	0.986166	1.23828			3.87288	3.29879	4.17581			1.32765	1.09278	1.23765
									A549
	Cell only					GFP+empty vector					WT HSF1					Mutant HSF1
	1	1	1			1.06276	1.03973	1.10935			2.01987	2.91872	3.39773			1.33286	1.20924	2.09239
									RPE1
	Cell only					GFP+empty vector					WT HSF1					Mutant HSF1
	1	1	1			0.983763	1.00287	1.19239			1.85424	1.52877	2.72372			1.09329	1.10239	1.19844
C								A549
	Capsaicin	WT					alpha KO					Beta KO
	0	1	1	1			1	1	1			1	1	1
	100	1.45021	1.36432	1.26			1.22309	1.32733	1.29182			1.02309	1.02733	1.09387
	200	1.82134	1.91328	2.13			1.85543	1.92506	1.71625			1.25543	1.32506	1.39283
D						A549
	Capsaicin	WT			Alpah KO			Beta KO
	0	100	100	100	100	100	100	100	100	100
	10	110	111	104	168	128	133	104	109	101
	40	124	133	121	172	171	189	103	108	103
	80	136	166	152	181	192	188	116	114	109
	120	148	193	178	245	242	192	128	121	112
	200	171	221	177	246	269	221	133	128	145
	250	193	233	186	251	281	241	142	139	133
F										HEK WT							HSF1-KD 2
		Cell only					Scr					HSF1-KD 1					0.837624	0.732876	0.923872
		1.27726	2.29761	2.17828			2.15413	2.19872	2.76513			0.537136	0.781286	1.02983
										A549WT
		Cell only					Scr					HSF1-KD 1					HSF1-KD 2
		1.87634	1.73486	2.37835			2.12653	1.83736	2.38343			1.19383	0.921187	0.826254			1.07284	0.827255	1.12873
										A549alphaKO
		Cell only					Scr					HSF1-KD 1					HSF1-KD 2
		2.93487	3.12935	2.84745			3.28724	2.84762	3.8375			0.823862	0.927523	0.902987			1.02972	0.828633	1.18726
G
		WT MAF						--/+-
		100	100	100	100	100	100	230	218	188	178	196	166
H
		WT MAF						--/+-
		1	1	1	1	1	1	17.3	16.1	14.4	11.5	14.3	16.7
I		WT MAF						--/+-
	HSF1 activity in 37	1	1	1				17.3	16.1	14.4
	HSF1 activity in 41	2.83815	2.02854	3.66076				10.5	16.3	12.2421
J
		WT MAF						--/+-
	Cell size in 37	100	100	100	100			170	166	188	178
	Cell size in HS	139	128	146	141			182	178	192	201
