# Supplementary material for: Hsf1 and the molecular chaperone Hsp90 support a ‘rewiring stress response’ leading to an adaptive cell size increase in chronic stress
Source: eLife. 2023 Dec 7;12:RP88658. doi: 10.7554/eLife.88658 (PMC10703448; doi:10.7554/eLife.88658)
Supplement: Figure 3—source data 1. [file elife-88658-fig3-data1.xlsx]

## Sheet: Fig. 3
3A									HEK
	WT						Hsp90alpha KO						Hsp90Beta KO
	1	1	1	1	1	1	1.44156	1.50938	1.50399	1.52649	1.22394	1.28183	1.39192	1.13951	1.12773	1.22864	1.12718	1.02394
									A549
	WT						Hsp90alpha KO						Hsp90Beta KO
	1	1	1	1	1	1	2.12976	1.52515	1.7785	1.74666	2.0244	1.32362	1.28957	1.027	1.29265	1.02195	1.06464	1.12919
3C									HEK
	WT						Hsp90alpha KO						Hsp90Beta KO
	1.91415	1.92279	1.87195	2.22941	2.76678	2.7579	3.58617	3.26979	3.07812	2.99334	2.68562	2.97284	3.11758	4.01942	3.76659	3.61631	3.23267	4.2509
									A549
	WT												Hsp90alpha KO												Hsp90beta KO
	7.92527	5.86777	6.01117	6.66703	8.78379	6.22768	5.58718	3.98672	6.35576	3.61716	5.71559	10.3022	5.23456	3.96447	3.7805	3.42638	4.47459	3.71301	5.33524	7.35658	6.66299	7.5183	7.29877	5.69566	7.10368	5.84901	5.41833	5.73859	6.60726	5.19746	6.84404	8.77905	5.92318	4.39457	7.50586	9.16904
3E
										HEK
	GFP+empty vector								WT HSF1								Mutant HSF1
	100	100	100	100					110	112	121	108					101	104	108	104
										A549
	GFP+empty vector								WT HSF1								Mutant HSF1
	100	100	100	100					110	140	144	137					119	118	116	126
										RPE1
	GFP+empty vector								WT HSF1								Mutant HSF1
	100	100	100	100					130	131	133	131					104	121	103	102
						A549WT
3F		WT Scr			WT HSF1-KD 1			WT HSF1-KD 2
	37	1	1	1	1	1	1	1	1	1
	HS	1.11972	1.12128	1.19	0.896907	0.905537	0.875349	0.861671	0.851562	0.817188
						A549alphaKO
	Scr in 37°C			Scr in 39°C			HSF1-KD 1 in 37°C			HSF1-KD 1 in 39°C			HSF1-KD 2 in 39°C			HSF1-KD 2 in 39°C
	1	1	1	1.19	1.12	1.25	1	1	1	0.98	0.96	1.02	1	1	1	1.01	1.01	0.98
						HEK WT
		WT Scr			WT HSF1-KD 1			WT HSF1-KD 2
	37	1	1	1	1	1	1	1	1	1
	HS	1.10927	1.11984	1.21939	0.936257	1.00082	0.998273	1.00379	0.988272	0.92802
