# Supplementary material for: Hsf1 and the molecular chaperone Hsp90 support a ‘rewiring stress response’ leading to an adaptive cell size increase in chronic stress
Source: eLife. 2023 Dec 7;12:RP88658. doi: 10.7554/eLife.88658 (PMC10703448; doi:10.7554/eLife.88658)
Supplement: Figure 4—source data 2. [file elife-88658-fig4-data2.xlsx]

## Sheet: Fig. 4
4D
		WT				alpha KO				beta KO
	0	2.47994	0.178968	0.194265		3.36596	0.19762	0.19762		2.27645	0.34443	0.34443
	1	8.37891	1.27549	1.51886		14.3833	1.86641	2.91775		10.2068	2.68644	3.94744
	2	8.66618	2.48432	2.42518		18.1517	3.52278	4.71414		10.2068	6.77316	6.98347
	3	15.1444	6.21911	7.16523		21.3106	10.6977	11.8292		16.8562	11.3924	12.9827
4E
					HEK WT								HEK alphaKO								HEKbetaKO
		37 °C				39 °C				37 °C				39 °C				37 °C				39 °C
		2.47994	0.178968	0.194265		7.5422	1.42668	1.30704		3.36596	0.19762	0.19762		14.066	2.32215	2.94614		2.27645	0.34443	0.34443		10.4156	2.11598	1.68701
		8.37891	1.27549	1.51886		13.2527	5.81704	4.96861		14.3833	1.86641	2.91775		29.3915	10.5274	9.7523		10.2068	2.68644	3.94744		25.8865	12.3765	8.62915
		8.66618	2.48432	2.42518		14.4521	7.93713	6.58714		18.1517	3.52278	4.71414		29.3915	20.7153	22.9529		10.2068	6.77316	6.98347		23.8428	16.2092	15.2403
		15.1444	6.21911	7.16523		18.4439	11.8696	10.1899		21.3106	10.6977	11.8292		36.1274	18.1496	23.8748		16.8562	11.3924	12.9827		27.1295	17.0416	17.0416
