# Supplementary material for: Hsf1 and the molecular chaperone Hsp90 support a ‘rewiring stress response’ leading to an adaptive cell size increase in chronic stress
Source: eLife. 2023 Dec 7;12:RP88658. doi: 10.7554/eLife.88658 (PMC10703448; doi:10.7554/eLife.88658)
Supplement: Figure 5—figure supplement 1—source data 1. [file elife-88658-fig5-figsupp1-data1.xlsx]

## Sheet: Fig5–FigSuppl1
B
	WT										alpha KO										beta KO
Diff. Coeff.	0.3401	0.3006	0.3401	0.3828	0.1391	0.267	0.4408	0.4221	0.2021	0.1572	0.1403	0.1856	0.3286	0.1883	0.193	0.2298	0.2086	0.1831	0.1829	0.2905	0.3943	0.2376	0.3814	0.325	0.2086	0.1875	0.1399	0.3896	0.1676	0.1352
	WT										alpha KO										beta KO
t1/2	2.038	2.306	2.038	1.811	4.985	2.596	1.573	1.642	3.43	4.409	4.94	3.734	2.11	3.681	3.591	3.017	3.323	3.785	3.789	2.386	1.758	2.917	1.818	2.133	3.323	3.697	4.954	1.779	4.136	5.125
C
	WT										alpha ko										beta ko
Diff. Coeff.	3.055	2.914	1.997	2.726	6.486	5.107	6.089	7.112	1.985	6.716	2.086	3.149	3.197	3.417	1.346	1.335	1.265	1.647	4.119	1.759	2.464	3.134	2.276	2.137	1.791	2.255	1.725	2.163	1.634	1.72
t1/2	0.2269	0.2378	0.347	0.2543	0.1069	0.1357	0.1138	0.09747	0.3491	0.1032	0.3323	0.2201	0.2168	0.2028	0.5151	0.5192	0.5481	0.4208	0.1683	0.394	0.2813	0.2212	0.3045	0.3243	0.387	0.3073	0.4019	0.3204	0.4242	0.403
D
diffusion coefficient					37°C						40°C
WT	3.055	2.914	1.997	2.726	6.486	5.107	6.089	7.112	1.985	6.716	4.043	4.526	2.635	1.999	2.967	3.662	3.833	2.091	2.448	2.918
Alpha KO	2.086	3.149	3.197	3.417	1.346	1.335	1.265	1.647	4.119	1.759	3.682	3.524	3.815	2.906	2.935	3.841	2.698	4.311	2.807	3.8
Beta KO	2.464	3.134	2.276	2.137	1.791	2.255	1.725	2.163	1.634	1.72	4.249	4.171	1.895	4.551	2.812	2.508	4.09	2.755	4.551	2.616
t1/2
WT	0.2269	0.2378	0.347	0.2543	0.1069	0.1357	0.1138	0.09747	0.3491	0.1032	0.1715	0.1531	0.2631	0.162	0.2336	0.1893	0.1808	0.3315	0.2832	0.1649
Alpha KO	0.3323	0.2201	0.2168	0.2028	0.5151	0.5192	0.5481	0.4208	0.1683	0.394	0.1882	0.1967	0.1817	0.2385	0.2361	0.1805	0.2569	0.1608	0.2469	0.1824
Beta KO	0.2813	0.2212	0.3045	0.3243	0.387	0.3073	0.4019	0.3204	0.4242	0.403	0.1631	0.1662	0.3658	0.1523	0.2465	0.2764	0.1695	0.2516	0.1523	0.265
E
	37°C										40°C
A549	HS 1D										HS 1D
WT	5.41	6.89	4.32	5.39	6.44	5.88	7.29	6.84	5.99	5.79	7.74	6.47	7.42	7.02	8.53	8.15	8.11	5.32	8.9	7.81
alpha KO	6.33	6.43	4.12	6.08	6.37	7.83	6.39	7.78	6.82	8.75	4.23	3.26	5.14	4.35	5.59	3.22	2.9	3.69	5.19	6.38
Beta KO	6.89	6.78	3.79	5.5	6.49	8.37	7.32	6.55	6.83	8.02	4.88	2.21	4.89	5.22	3.45	5.89	4.41	3.42	5.34	3.91
																					HS 4D										1 week
																					HS 1D										HS 1D
	Normal										Stressed 1D										5.1	4.3	4.8	5.2	3.9	5.89993	5.43212	4.70574	5.0235	6.35008	5.91	6.52	6.1	5.86	4.8	5.89993	4.43212	6.70574	6.0235	5.35008
HEK	HS 1D										HS 1D										1.99	3.07	4.01	3.21	3.8	2.92796	2.32775	2.96326	3.91654	1.92234	3.1	2.89	4.26	2.99	3.22	2.62233	2.16593	2.27126	0.937189	1.42869
WT	2.87	2.91	3.5	3.82	4.1	3.08684	3.08684	3.21041	6.57334	4.41083	2.9	3.8	3.9	4.1	3.5	4.78154	4.04011	3.1751	3.58995	2.50516	3.11	4.2	3.63	3.33	3.51	2.09572	2.63988	3.02606	2.42924	3.37713	3.91	3.87	3.74	3.99	3.89	2.71093	1.46274	2.54842	1.99234	2.38954
alpha KO	3.08	3.8	4.1	3.2	3.33	4.78154	4.04011	3.1751	3.58995	2.95444	4.11	4.76	4.28	4.1	4.32	4.57853	3.51934	3.81062	2.37188	4.5697
Beta KO	3.99	5.2	3.56	4.01	3.62	3.08684	2.11591	4.16368	4.41083	5.53959	4.1	3.99	4.31	4.22	3.86	4.23429	4.88746	4.32256	4.12838	3.79296
