# Supplementary material for: Hsf1 and the molecular chaperone Hsp90 support a ‘rewiring stress response’ leading to an adaptive cell size increase in chronic stress
Source: eLife. 2023 Dec 7;12:RP88658. doi: 10.7554/eLife.88658 (PMC10703448; doi:10.7554/eLife.88658)
Supplement: Figure 5—source data 1. [file elife-88658-fig5-data1.xlsx]

## Sheet: Fig. 5
5A
										HEK WT
	37°C										39°C
Diff. Coeff.	0.3943	0.2376	0.3814	0.325	0.2086	0.1875	0.1399	0.3896	0.1676	0.1352	0.3185	0.4681	0.322	0.3837	0.6295	0.4629	0.5283	0.263	0.4924	0.3042
										HEK alphaKO
	37°C										39°C
Diff. Coeff.	0.1403	0.1856	0.3286	0.1883	0.193	0.2298	0.2086	0.1831	0.1829	0.2905	0.4102	0.4708	0.2342	0.1813	0.2735	0.5266	0.3729	0.3709	0.3697	0.1957
										HEK betaKO
	37°C										39°C
Diff. Coeff.	0.3943	0.2376	0.3814	0.325	0.2086	0.1875	0.1399	0.3896	0.1676	0.1352	0.3185	0.4681	0.322	0.3837	0.6295	0.4629	0.5283	0.263	0.4924	0.3042
										HEK WT
	37°C										39°C
t 1/2	2.038	2.306	2.038	1.811	4.985	2.596	1.573	1.642	3.43	4.409	4.503	4.175	1.171	5.445	2.142	2.264	4.981	2.186	3.839	1.575
										HEK alphaKO
	37°C										39°C
t 1/2	4.94	3.734	2.11	3.681	3.591	3.017	3.323	3.785	3.789	2.386	1.69	1.472	2.959	3.823	2.535	1.316	1.859	1.869	1.875	3.542
										HEK betaKO
	37°C										39°C
t 1/2	1.758	2.917	1.818	2.133	3.323	3.697	4.954	1.779	4.136	5.125	2.177	1.481	2.153	1.806	1.101	1.497	1.312	2.635	1.408	2.279
5B
							HEK WT
		Cell Size					Protein concentration
		HS 1D					HS 1D
	37	1	1	1	1	1	1	1	1	1	1
	HS 1D	1.07018	1.0309	1.0295	1.01994	0.980447	1.01045	1.30584	1.11429	1.0733	0.853659
	HS 4D	1.1462	1.1264	1.12684	1.10541	1.08939	1.75862	1.47766	1.65714	1.5122	0.95122
	HS 7D	1.22807	1.21348	1.24189	1.25071	1.17039	2.40767	1.97895	1.74286	1.53403	1.43902
							HEK alphaKO
		Cell Size					Protein Concentration
	37	1	1	1	1	1	1	1	1	1	1
	HS 1D	1.02514	1.04843	1.0088	1.04651	0.985955	1.33442	1.25263	1.0439	1.28125	1.2973
	HS 4D	1.11453	1.10256	1.14956	1.17151	0.896067	0.970779	0.807895	0.978049	1.00313	1.14114
	HS 7D	1.26816	1.27635	1.26686	1.3314	1.26966	1.00649	0.760526	1.03902	0.934375	0.966967
							HEK betaKO
		Cell Size					Protein Concentration
	37	1	1	1	1	1	1	1	1	1	1
	HS 1D	1.02222	0.98324	1.01705	1.02216	1.02817	1.02757	1.24687	1.21067	1.05237	1.0663
	HS 4D	1.10833	1.08101	1.1392	1.13019	1.10423	0.779449	1.3125	1.01966	0.830424	0.969613
	HS 7D	1.19722	1.2067	1.27273	1.1856	1.24225	0.97995	1.20938	1.05056	0.995012	1.07459
