# Supplementary material for: Hsf1 and the molecular chaperone Hsp90 support a ‘rewiring stress response’ leading to an adaptive cell size increase in chronic stress
Source: eLife. 2023 Dec 7;12:RP88658. doi: 10.7554/eLife.88658 (PMC10703448; doi:10.7554/eLife.88658)
Supplement: Figure 6—figure supplement 1—source data 1. [file elife-88658-fig6-figsupp1-data1.xlsx]

## Sheet: Fig6–FigSuppl1
A
	WT 37				WT HS					Hsp90alpha KO 37				Hsp90alpha KO HS					Hsp90beta KO 37				Hsp90beta KO HS
	0	0	0	0	0	0	0	0		0	0	0	0	0	0	0	0		0	0	0	0	0	0	0	0
	2.79	2.18	3.39	3.1	4.63	4.98	4.41	5.3		5.47	5.18	4.32	5.11	3.29	3.85	2.7	2.99		4.76	5.73	3.93	4.08	2.04	3.14	2.48	3.13
	4.82	4.89	4.02	5.02	7.75	6.79	7.88	7.11		8.59	8.26	8.82	7.38	4.8	4.25	5.43	5.64		6.28	7.5	5.81	6.19	3.5	4.11	4.89	4.41
	5.79	6.11	5.65	5.97	9.6	8.83	9.1	8.09		8.96	8.91	9.1	8.21	5.61	5.09	5.12	5.81		7.09	8.2	6.85	8.11	5.12	4.39	5.66	4.96
B
	Puromycin incorporation
0	2.00079	3.04536	2.04457	3.37365
4h	0.90192	1.02423	0.84145	1.32135
4d	4.37171	4.18	5.24221	5.58498
