# Supplementary material for: Hsf1 and the molecular chaperone Hsp90 support a ‘rewiring stress response’ leading to an adaptive cell size increase in chronic stress
Source: eLife. 2023 Dec 7;12:RP88658. doi: 10.7554/eLife.88658 (PMC10703448; doi:10.7554/eLife.88658)
Supplement: Figure 6—figure supplement 2—source data 2. [file elife-88658-fig6-figsupp2-data2.xlsx]

## Sheet: Fig6–FigSuppl 2
							p-eIF2 alpha
			WT				Hsp90 alpha KO				Hsp90 beta KO
	37	1	1	1		1	1	1		1	1	1
	39 4h	2.20115	2.87347	1.82765		3.79873	3.29183	2.69824		3.73811	6.70575	5.23935
	39 1d	0.269057	1.29348	0.812876		5.11121	2.98165	4.12563		9.62427	7.35807	3.28752
	394d	0.931223	1.22918	0.728929		7.18427	2.56984	4.91871		9.73906	5.90743	3.77644
							p-mTOR
	37	1	1	1		1	1	1
	39 4h	0.138309	0.329981	0.524491		0.258546	0.329981	0.524491		1	1	1
	39 1d	0.805176	2.11892	1.27635		1.69295	1.11892	0.982764		1.19782	0.518761	0.628723
	394d	1.92235	1.39288	2.50929		0.710443	0.892876	1.50929		1.06031	0.391287	0.726752
										0.82633	1.69279	1.18752
							p-S6
	37	1	1	1		1	1	1		1	1	1
	39 4h	0.860375	0.598238	0.823765		0.228394	0.587265	0.698635		0.650158	0.398349	0.572216
	39 1d	2.46841	2.19438	1.27653		0.466534	1.39864	1.28763		0.52321	0.934763	1.18735
	394d	1.53615	1.87613	2.18761		0.376933	1.18347	1.49837		1.61103	1.48457	1.95488
