# Supplementary material for: Hsf1 and the molecular chaperone Hsp90 support a ‘rewiring stress response’ leading to an adaptive cell size increase in chronic stress
Source: eLife. 2023 Dec 7;12:RP88658. doi: 10.7554/eLife.88658 (PMC10703448; doi:10.7554/eLife.88658)
Supplement: Figure 6—source data 1. [file elife-88658-fig6-data1.xlsx]

## Sheet: Fig. 6A,C,D,E
		6A
			hours	WT 37				WT HS					Hsp90alpha KO 37				Hsp90alpha KO HS					Hsp90beta KO 37				Hsp90beta KO HS
			0	0	0	0	0	0	0	0	0		0	0	0	0	0	0	0	0		0	0	0	0	0	0	0	0
			1	3.24	2.19	2.93	3.63	6.52	5.84	6.18	6.3		4.449	3.24	5.18	5.29	1.37	1.42	2.01	1.99		4.76	5.73	3.93	4.08	2.21	3.22	3.81	2.84
			2	4.63	5.641	4.42	5.11	7.75	7.92	6.92	7.21		7.38	6.94	7.72	7.16	3.61	2.94	3.69	2.72		6.28	7.5	5.81	6.19	2.22	2.6	3.88	3.52
			3	8.3	7.52	7.8	8.53	8	8.33	7.08	7.62		8.96	8.37	8.36	8.54	4.55	4.01	3.48	3.61		7.09	8.2	6.85	8.11	5.17	4.38	5.19	5.39
		6C			WT			Hsp90alpha KO					Hsp90beta KO
			37	1	1	1		1	1	1		1	1	1
			39 4h	2.12307	2.10298	2.99283		1.27599	2.68793	3.09187		2.25057	1.46372	2.22939
			39 1d	1.15887	1.22348	1.09385		1.99829	2.81783	2.20198		2.93339	2.18297	2.91729
			394d	0.495043	0.598776	0.837365		3.95297	1.98737	2.98276		2.16042	1.89288	2.21213
		6D							p-mTOR
					WT			Hsp90alpha KO					Hsp90beta KO
				1	1	1		1	1	1		1	1	1
				1.50693	1.67388	1.4103		0.737977	0.842128	1.02838		2.57179	3.64901	2.18733
				2.05089	1.89876	2.19289		1.92022	1.39989	1.42838		3.65823	5.95472	2.81726
									p-S6
				1	1	1		1	1	1		1	1	1
				1.2785	1.21003	1.39833		0.900544	0.397464	0.498733		0.121279	0.487648	2.54661
				1.23168	2.01981	1.39128		1.54131	1.83288	1.19286		2.30316	3.37813	4.38595
		6E
								A549 WT
			Control				4h				1d
		Cell size	0.00079091	0.0453688	0.0445779	0.0373654	-0.0001809	0.024235	0.0414508	0.0336356	0.371715	0.186845	0.242219	0.384984
		Puromycin incorporation	0.0259253	0.0333001	0.0592254	0.0326739	-0.212823	-0.188091	-0.243503	-0.297524	0.388824	0.468836	0.538378	0.433288
								A549 alpha KO
			Control				4h				1d
		Cell size	0.000984763	0.0093874	8.4746e-05	3.947e-06	4.94874e-05	0.00034994	-0.00383975	0.00028378	0.463739	0.289385	0.44949	0.304894
		Puromycin incorporation	0.00123894	0.0473899	0.067368	0.0384984	-0.374873	-0.129039	-0.384984	-0.189384	-0.190385	-0.0587369	0.138378	-0.193848
								A549 beta KO
			Control				4h				1d
		Cell size	9.83746e-05	0.00837366	0.00384746	0.0392837	-0.0192838	0.00394873	0.000393736	0.0293848	0.39485	0.293838	0.493837	0.592838
		Puromycin incorporation	0.0192838	0.0293847	0.0728273	0.0928727	-0.187327	-0.0998091	-0.282763	-0.482628	0.153287	-0.228724	-0.0238378	-0.198328

## Sheet: Fig. 6B
HEK WT
	37	HS
	0	0
	-0.188	-0.2906
	-0.188	-0.2906
	-0.188	-0.2906
	-0.188	-0.2906
	-0.1929	-0.2906
	-0.188	-0.3004
	-0.188	-0.2906
	-0.188	-0.2906
	-0.188	-0.2906
	-0.188	-0.3004
	-0.188	-0.3004
	-0.188	-0.2906
	-0.1929	-0.2906
	-0.188	-0.2906
	-0.188	-0.3004
	-0.188	-0.2906
	-0.188	-0.3004
	-0.188	-0.2906
	-0.188	-0.2906
	-0.188	-0.2906
	-0.188	-0.2906
	-0.1929	-0.2906
	-0.188	-0.3004
	-0.188	-0.2906
	-0.188	-0.2906
	-0.188	-0.2906
	-0.188	-0.2906
	-0.188	-0.2906
	-0.188	-0.2906
	-0.188	-0.3004
	-0.188	-0.2906
	-0.188	-0.3004
	-0.188	-0.2906
	-0.188	-0.2906
	-0.188	-0.2906
	-0.188	-0.2906
	-0.188	-0.2906
	-0.188	-0.2906
	-0.188	-0.3004
	-0.188	-0.2906
	-0.188	-0.2906
	-0.188	-0.3004
	-0.188	-0.2906
	-0.188	-0.2906
	-0.188	-0.2906
	-0.188	-0.2906
	-0.188	-0.2906
	-0.188	-0.3004
	-0.188	-0.3004
	-0.188	-0.2906
	-0.188	-0.2906
	-0.188	-0.2906
	-0.188	-0.3004
	-0.188	-0.2906
	-0.188	-0.2906
	-0.188	-0.2906
	-0.188	-0.3004
	-0.188	-0.2906
	-0.188	-0.3004
	-0.188	-0.2906
	-0.188	-0.2906
	-0.188	-0.2906
	-0.188	-0.2906
	-0.188	-0.2906
	-0.188	-0.2906
	-0.188	-0.2906
	-0.188	-0.3004
	-0.188	-0.2906
	-0.188	-0.2906
	-0.188	-0.3004
	-0.188	-0.2906
	-0.188	-0.2906
	-0.188	-0.2906
	-0.188	-0.2906
	-0.188	-0.3004
	-0.188	-0.2906
	-0.188	-0.2906
	-0.188	-0.2906
	-0.188	-0.2906
	-0.188	-0.2906
	-0.188	-0.2906
	-0.188	-0.2906
	-0.1929	-0.2906
	-0.188	-0.2906
	-0.188	-0.2906
	-0.188	-0.2906
	-0.188	-0.3004
	-0.188	-0.2906
	-0.188	-0.2906
	-0.188	-0.2906
	-0.188	-0.2906
	-0.188	-0.2906
	-0.188	-0.3004
	-0.188	-0.2906
	-0.188	-0.2906
	-0.188	-0.2906
	-0.188	-0.3004
	-0.188	-0.2906
	-0.188	-0.2906
	-0.188	-0.2906
	-0.188	-0.3004
	-0.188	-0.2906
	-0.188	-0.3004
	-0.188	-0.2906
	-0.188	-0.2906
	-0.188	-0.2906
	-0.188	-0.2906
	-0.188	-0.2906
	-0.188	-0.2906
	-0.188	-0.2906
	-0.188	-0.2906
	-0.188	-0.2906
	-0.188	-0.2906
	-0.188	-0.2906
	-0.188	-0.2906
	-0.188	-0.2906
	-0.188	-0.2906
	-0.188	-0.2906
	-0.188	-0.2906
	-0.188	-0.2906
	-0.188	-0.2906
	-0.188	-0.3004
	-0.188	-0.2906
	-0.188	-0.2906
	-0.188	-0.2906
	-0.188	-0.2906
	-0.188	-0.2906
	-0.188	-0.2906
	-0.188	-0.2906
	-0.188	-0.2906
	-0.188	-0.2906
	-0.188	-0.2906
	-0.188	-0.2906
	-0.188	-0.2906
	-0.188	-0.2906
	-0.188	-0.2906
	-0.188	-0.2906
	-0.188	-0.2906
	-0.188	-0.2906
	-0.188	-0.2906
	-0.188	-0.2906
	-0.188	-0.2906
	-0.188	-0.2906
	-0.188	-0.2906
	-0.188	-0.2906
	-0.188	-0.2906
	-0.188	-0.2906
	-0.188	-0.2906
	-0.188	-0.2906
	-0.188	-0.2906
	-0.188	-0.2906
	-0.188	-0.2906
	-0.188	-0.3004
	-0.188	-0.3004
	-0.188	-0.2906
	-0.188	-0.2906
	-0.188	-0.2906
	-0.188	-0.2906
	-0.188	-0.2906
	-0.188	-0.2906
	-0.188	-0.2906
	-0.188	-0.2906
	-0.188	-0.2906
	-0.188	-0.3004
	-0.188	-0.2906
	-0.188	-0.2906
	-0.188	-0.2906
	-0.188	-0.2906
	-0.188	-0.2906
	-0.188	-0.2906
	-0.188	-0.2906
	-0.188	-0.2906
	-0.188	-0.2906
	-0.188	-0.2906
	-0.188	-0.2906
	-0.188	-0.3004
	-0.188	-0.2906
	-0.188	-0.2906
	-0.188	-0.2906
	-0.188	-0.2906
	-0.188	-0.2906
	-0.188	-0.2906
	-0.188	-0.2906
	-0.188	-0.2906
	-0.188	-0.2906
	-0.188	-0.2906
	-0.188	-0.2906
	-0.188	-0.2906
	-0.188	-0.2906
	-0.188	-0.2906
	-0.188	-0.2906
	-0.188	-0.2906
	-0.188	-0.2906
	-0.188	-0.2906
	-0.188	-0.2906
	-0.188	-0.2906
	-0.188	-0.3004
	-0.188	-0.2906
	-0.188	-0.2906
	-0.188	-0.2906
	-0.188	-0.2906
	-0.188	-0.3004
	-0.188	-0.2906
	-0.188	-0.2906
	-0.188	-0.2906
	-0.188	-0.2906
	-0.188	-0.2906
	-0.188	-0.2906
	-0.188	-0.2906
	-0.188	-0.2906
	-0.188	-0.2906
	-0.188	-0.2906
	-0.188	-0.2906
	-0.188	-0.2906
	-0.188	-0.2906
	-0.188	-0.3004
	-0.188	-0.2906
	-0.188	-0.2906
	-0.188	-0.2906
	-0.188	-0.3004
	-0.188	-0.2906
	-0.188	-0.2906
	-0.188	-0.2906
	-0.188	-0.3004
	-0.188	-0.2906
	-0.188	-0.2906
	-0.188	-0.2906
	-0.188	-0.2906
	-0.188	-0.2906
	-0.188	-0.2906
	-0.188	-0.2906
	-0.188	-0.2906
	-0.188	-0.3004
	-0.188	-0.3004
	-0.188	-0.2906
	-0.188	-0.2906
	-0.188	-0.2906
	-0.188	-0.2906
	-0.188	-0.2906
	-0.188	-0.3004
	-0.188	-0.2906
	-0.188	-0.2906
	-0.1929	-0.2906
	-0.188	-0.2906
	-0.188	-0.2906
	-0.188	-0.2906
	-0.188	-0.2906
	-0.188	-0.2906
	-0.188	-0.2906
	-0.188	-0.2906
	-0.188	-0.2906
	-0.188	-0.2906
	-0.188	-0.2906
	-0.188	-0.2906
	-0.188	-0.2906
	-0.188	-0.2906
	-0.188	-0.2906
	-0.188	-0.2906
	-0.188	-0.2906
	-0.188	-0.2906
	-0.188	-0.2906
	-0.188	-0.3004
	-0.188	-0.2906
	-0.188	-0.3004
	-0.188	-0.2906
	-0.188	-0.3004
	-0.188	-0.2906
	-0.188	-0.2906
	-0.188	-0.2906
	-0.188	-0.2906
	-0.188	-0.2906
	-0.188	-0.3004
	-0.188	-0.2906
	-0.188	-0.3004
	-0.188	-0.2906
	-0.188	-0.2906
	-0.188	-0.2906
	-0.188	-0.2906
	-0.188	-0.2906
	-0.188	-0.2906
	-0.188	-0.3004
	-0.188	-0.2906
	-0.188	-0.2906
	-0.188	-0.3004
	-0.188	-0.2906
	-0.188	-0.2906
	-0.188	-0.2906
	-0.188	-0.3004
	-0.188	-0.2906
	-0.188	-0.2906
	-0.188	-0.2906
	-0.188	-0.2906
	-0.188	-0.2906
	-0.188	-0.2906
	-0.188	-0.2906
	-0.188	-0.2906
	-0.188	-0.2906
	-0.188	-0.3004
	-0.188	-0.2906
	-0.188	-0.2906
	-0.188	-0.2906
	-0.188	-0.2906
	-0.188	-0.2906
	-0.188	-0.2906
	-0.188	-0.2906
	-0.188	-0.2906
	-0.188	-0.2906
	-0.188	-0.2906
	-0.188	-0.2906
	-0.188	-0.3004
	-0.188	-0.2906
	-0.188	-0.3004
	-0.188	-0.2906
	-0.188	-0.2906
	-0.188	-0.2906
	-0.188	-0.2906
	-0.188	-0.2906
	-0.188	-0.2906
	-0.188	-0.2906
	-0.188	-0.2906
	-0.188	-0.2906
	-0.188	-0.2906
	-0.188	-0.3004
	-0.188	-0.2906
	-0.188	-0.2906
	-0.188	-0.2906
	-0.188	-0.2906
	-0.188	-0.2906
	-0.188	-0.2906
	-0.188	-0.3004
	-0.188	-0.2906
	-0.188	-0.3004
	-0.188	-0.2906
	-0.188	-0.2906
	-0.188	-0.2906
	-0.188	-0.2906
	-0.188	-0.2906
	-0.188	-0.2906
	-0.188	-0.2906
	-0.188	-0.3004
	-0.188	-0.2906
	-0.188	-0.2906
	-0.188	-0.3004
	-0.188	-0.2906
	-0.188	-0.2906
	-0.188	-0.3004
	-0.188	-0.2906
	-0.188	-0.3004
	-0.188	-0.3004
	-0.188	-0.2906
	-0.188	-0.2906
	-0.188	-0.2906
	-0.188	-0.2906
	-0.188	-0.3004
	-0.188	-0.3004
	-0.188	-0.2906
	-0.188	-0.2906
	-0.188	-0.3004
	-0.188	-0.3004
	-0.188	-0.2906
	-0.188	-0.2906
	-0.188	-0.2906
	-0.188	-0.2906
	-0.188	-0.2906
	-0.188	-0.3004
	-0.188	-0.3004
	-0.188	-0.2906
	-0.188	-0.2906
	-0.188	-0.2906
	-0.188	-0.2906
	-0.188	-0.2906
	-0.188	-0.2906
	-0.188	-0.2906
	-0.188	-0.2906
	-0.188	-0.2906
	-0.188	-0.2906
	-0.188	-0.2906
	-0.188	-0.3004
	-0.188	-0.2906
	-0.188	-0.2906
	-0.188	-0.2906
	-0.188	-0.2906
	-0.188	-0.2906
	-0.188	-0.2906
	-0.188	-0.2906
	-0.188	-0.2906
	-0.188	-0.2906
	-0.188	-0.2906
	-0.188	-0.2906
	-0.188	-0.2906
	-0.188	-0.2906
	-0.188	-0.3004
	-0.188	-0.2906
	-0.188	-0.2906
	-0.188	-0.2906
	-0.188	-0.2906
	-0.188	-0.2906
	-0.188	-0.2906
	-0.188	-0.2906
	-0.188	-0.2906
	-0.188	-0.2906
	-0.188	-0.2906
	-0.188	-0.2906
	-0.188	-0.3004
	-0.188	-0.2906
	-0.188	-0.2906
	-0.188	-0.2906
	-0.188	-0.3004
	-0.188	-0.2906
	-0.188	-0.2906
	-0.188	-0.2906
	-0.188	-0.2906
	-0.188	-0.2906
	-0.188	-0.2906
	-0.188	-0.2906
	-0.188	-0.3004
	-0.188	-0.2906
	-0.1929	-0.2906
	-0.188	-0.2906
	-0.188	-0.2906
	-0.188	-0.2906
	-0.188	-0.2906
	-0.188	-0.2906
	-0.188	-0.2906
	-0.188	-0.2906
	-0.188	-0.2906
	-0.188	-0.2906
	-0.188	-0.2906
	-0.188	-0.2906
	-0.188	-0.2906
	-0.188	-0.2906
	-0.188	-0.2906
	-0.188	-0.2906
	-0.188	-0.3004
	-0.188	-0.2906
	-0.188	-0.2906
	-0.188	-0.2906
	-0.188	-0.2906
	-0.188	-0.2906
	-0.188	-0.2906
	-0.188	-0.2906
	-0.188	-0.2906
	-0.188	-0.2906
	-0.188	-0.2906
	-0.188	-0.3004
	-0.188	-0.2906
	-0.188	-0.2906
	-0.188	-0.2906
	-0.188	-0.2906
	-0.188	-0.2906
	-0.188	-0.2906
	-0.188	-0.3004
	-0.188	-0.2906
	-0.188	-0.2906
	-0.188	-0.2906
	-0.188	-0.2906
	-0.188	-0.2906
	-0.188	-0.2906
	-0.188	-0.2906
	-0.188	-0.2906
	-0.188	-0.2906
	-0.188	-0.2906
	-0.188	-0.2906
	-0.188	-0.2906
	-0.188	-0.2906
	-0.188	-0.2906
	-0.188	-0.2906
	-0.188	-0.2906
	-0.188	-0.2906
	-0.188	-0.2906
	-0.188	-0.2906
	-0.188	-0.2906
	-0.188	-0.2906
	-0.188	-0.2906
	-0.188	-0.2906
	-0.188	-0.2906
	-0.188	-0.2906
	-0.188	-0.2906
	-0.188	-0.2906
	-0.188	-0.3004
	-0.188	-0.2906
	-0.188	-0.2906
	-0.188	-0.2906
	-0.188	-0.3004
	-0.188	-0.2906
	-0.188	-0.2906
	-0.188	-0.2906
	-0.188	-0.2906
	-0.188	-0.2906
	-0.188	-0.2906
	-0.188	-0.2906
	-0.188	-0.2906
	-0.188	-0.2906
	-0.188	-0.2906
	-0.188	-0.2906
	-0.188	-0.2906
	-0.188	-0.2906
	-0.188	-0.2906
	-0.188	-0.2906
	-0.188	-0.3004
	-0.188	-0.2906
	-0.188	-0.2906
	-0.188	-0.2906
	-0.188	-0.3004
	-0.188	-0.2906
	-0.188	-0.2906
	-0.188	-0.2906
	-0.188	-0.2906
	-0.188	-0.2906
	-0.188	-0.2906
	-0.188	-0.2906
	-0.188	-0.2906
	-0.188	-0.2906
	-0.188	-0.2906
	-0.188	-0.2906
	-0.188	-0.2906
	-0.188	-0.2906
	-0.188	-0.2906
	-0.188	-0.2906
	-0.188	-0.2906
	-0.188	-0.2906
	-0.188	-0.2906
	-0.188	-0.2906
	-0.188	-0.2906
	-0.188	-0.2906
	-0.188	-0.2906
	-0.188	-0.2906
	-0.188	-0.2906
	-0.188	-0.2906
	-0.188	-0.2906
	-0.188	-0.2906
	-0.188	-0.2906
	-0.188	-0.2906
	-0.188	-0.3004
	-0.188	-0.2906
	-0.188	-0.2906
	-0.188	-0.2906
	-0.188	-0.2906
	-0.188	-0.2906
	-0.188	-0.2906
	-0.188	-0.2906
	-0.188	-0.2906
	-0.188	-0.2906
	-0.188	-0.2906
	-0.188	-0.2906
	-0.188	-0.2906
	-0.188	-0.2906
	-0.188	-0.3004
	-0.188	-0.2906
	-0.188	-0.2906
	-0.1929	-0.2906
	-0.188	-0.2906
	-0.188	-0.2906
	-0.188	-0.2906
	-0.188	-0.2906
	-0.188	-0.2906
	-0.188	-0.2906
	-0.188	-0.2906
	-0.188	-0.2906
	-0.188	-0.3004
	-0.188	-0.2906
	-0.188	-0.2906
	-0.188	-0.2906
	-0.188	-0.2906
	-0.188	-0.2906
	-0.188	-0.2906
	-0.188	-0.2906
	-0.188	-0.2906
	-0.188	-0.2906
	-0.188	-0.2906
	-0.188	-0.2906
	-0.188	-0.2906
	-0.188	-0.2906
	-0.188	-0.3004
	-0.188	-0.3004
	-0.188	-0.2906
	-0.188	-0.2906
	-0.188	-0.2906
	-0.188	-0.2906
	-0.188	-0.3004
	-0.188	-0.2906
	-0.188	-0.2906
	-0.188	-0.2906
	-0.188	-0.3004
	-0.188	-0.2906
	-0.188	-0.2906
	-0.188	-0.2906
	-0.188	-0.2906
	-0.188	-0.2906
	-0.188	-0.3004
	-0.188	-0.2906
	-0.188	-0.2906
	-0.188	-0.2906
	-0.188	-0.2906
	-0.188	-0.2906
	-0.188	-0.2906
	-0.188	-0.2906
	-0.188	-0.2906
	-0.188	-0.2906
	-0.188	-0.3004
	-0.188	-0.2906
	-0.188	-0.2906
	-0.188	-0.2906
	-0.188	-0.2906
	-0.188	-0.2906
	-0.188	-0.2906
	-0.188	-0.2906
	-0.188	-0.2906
	-0.188	-0.2906
	-0.188	-0.2906
	-0.188	-0.2906
	-0.188	-0.2906
	-0.188	-0.2906
	-0.188	-0.3004
	-0.188	-0.2906
	-0.188	-0.2906
	-0.188	-0.2759
	-0.188	-0.2906
	-0.188	-0.2906
	-0.188	-0.3004
	-0.188	-0.2906
	-0.188	-0.2906
	-0.188	-0.3004
	-0.188	-0.2906
	-0.188	-0.2906
	-0.188	-0.2906
	-0.188	-0.2906
	-0.188	-0.2906
	-0.188	-0.2906
	-0.188	-0.2906
	-0.188	-0.2906
	-0.188	-0.3004
	-0.188	-0.2906
	-0.188	-0.2906
	-0.188	-0.2906
	-0.188	-0.2906
	-0.188	-0.3004
	-0.188	-0.2906
	-0.188	-0.2906
	-0.188	-0.2906
	-0.188	-0.2906
	-0.188	-0.2906
	-0.188	-0.2906
	-0.188	-0.2906
	-0.188	-0.2906
	-0.188	-0.2906
	-0.188	-0.2906
	-0.188	-0.2906
	-0.188	-0.2906
	-0.188	-0.2906
	-0.188	-0.2906
	-0.188	-0.2906
	-0.188	-0.2906
	-0.188	-0.2906
	-0.188	-0.2906
	-0.188	-0.2906
	-0.188	-0.2906
	-0.188	-0.2906
	-0.188	-0.2906
	-0.188	-0.2906
	-0.188	-0.2906
	-0.188	-0.2906
	-0.188	-0.2906
	-0.188	-0.2906
	-0.188	-0.2906
	-0.188	-0.2906
	-0.188	-0.2906
	-0.188	-0.2906
	-0.188	-0.3004
	-0.188	-0.2906
	-0.188	-0.2906
	-0.188	-0.2906
	-0.188	-0.2906
	-0.188	-0.2906
	-0.188	-0.2906
	-0.188	-0.3004
	-0.188	-0.2906
	-0.188	-0.2906
	-0.188	-0.2906
	-0.188	-0.2906
	-0.188	-0.3004
	-0.188	-0.2906
	-0.188	-0.2906
	-0.188	-0.2906
	-0.188	-0.2906
	-0.188	-0.2906
	-0.188	-0.2906
	-0.188	-0.2906
	-0.188	-0.2906
	-0.188	-0.3004
	-0.188	-0.2906
	-0.188	-0.2906
	-0.188	-0.2906
	-0.188	-0.2906
	-0.188	-0.2906
	-0.188	-0.2906
	-0.188	-0.2906
	-0.188	-0.2906
	-0.188	-0.2906
	-0.188	-0.2906
	-0.188	-0.2906
	-0.188	-0.2906
	-0.188	-0.2906
	-0.188	-0.2906
	-0.188	-0.2906
	-0.188	-0.2906
	-0.188	-0.2906
	-0.188	-0.2906
	-0.188	-0.2906
	-0.188	-0.2906
	-0.188	-0.2906
	-0.188	-0.2906
	-0.188	-0.2906
	-0.188	-0.2906
	-0.188	-0.2906
	-0.188	-0.2906
	-0.188	-0.2906
	-0.188	-0.2906
	-0.188	-0.2906
	-0.188	-0.2906
	-0.188	-0.3004
	-0.188	-0.2906
	-0.188	-0.2906
	-0.188	-0.2906
	-0.188	-0.2906
	-0.188	-0.2906
	-0.188	-0.2906
	-0.188	-0.2906
	-0.188	-0.2906
	-0.188	-0.2906
	-0.188	-0.2906
	-0.188	-0.2906
	-0.188	-0.2906
	-0.188	-0.2906
	-0.188	-0.2906
	-0.188	-0.2906
	-0.188	-0.3004
	-0.188	-0.2906
	-0.188	-0.2906
	-0.188	-0.2906
	-0.188	-0.2906
	-0.188	-0.2906
	-0.188	-0.2906
	-0.188	-0.2906
	-0.188	-0.2906
	-0.188	-0.2906
	-0.188	-0.2906
	-0.188	-0.2906
	-0.188	-0.2906
	-0.188	-0.2906
	-0.188	-0.2906
	-0.188	-0.2906
	-0.188	-0.2906
	-0.188	-0.2906
	-0.188	-0.2906
	-0.188	-0.2906
	-0.188	-0.2906
	-0.188	-0.2906
	-0.188	-0.2906
	-0.188	-0.2906
	-0.188	-0.2906
	-0.188	-0.2906
	-0.188	-0.2906
	-0.188	-0.2906
	-0.188	-0.2906
	-0.188	-0.2906
	-0.188	-0.2906
	-0.188	-0.2906
	-0.188	-0.2906
	-0.188	-0.2906
	-0.188	-0.2906
	-0.188	-0.2906
	-0.188	-0.2906
	-0.188	-0.2906
	-0.188	-0.2906
	-0.188	-0.3004
	-0.188	-0.2906
	-0.188	-0.2906
	-0.188	-0.2906
	-0.188	-0.2906
	-0.188	-0.2906
	-0.188	-0.2906
	-0.188	-0.2906
	-0.188	-0.2906
	-0.188	-0.3004
	-0.188	-0.2906
	-0.188	-0.2906
	-0.188	-0.2906
	-0.188	-0.3004
	-0.188	-0.2906
	-0.188	-0.2906
	-0.188	-0.2906
	-0.188	-0.2906
	-0.188	-0.2906
	-0.188	-0.2906
	-0.188	-0.2906
	-0.188	-0.2906
	-0.188	-0.2906
	-0.188	-0.2906
	-0.188	-0.2906
	-0.188	-0.2906
	-0.188	-0.2906
	-0.188	-0.2906
	-0.188	-0.2906
	-0.188	-0.3004
	-0.188	-0.2906
	-0.188	-0.2906
	-0.188	-0.2906
	-0.188	-0.2906
	-0.188	-0.2906
	-0.188	-0.3004
	-0.188	-0.2906
	-0.188	-0.3004
	-0.188	-0.2906
	-0.188	-0.2906
	-0.188	-0.2906
	-0.188	-0.2906
	-0.188	-0.3004
	-0.188	-0.2906
	-0.188	-0.2906
	-0.188	-0.3004
	-0.188	-0.2906
	-0.188	-0.3004
	-0.188	-0.2906
	-0.188	-0.2906
	-0.188	-0.2906
	-0.188	-0.2906
	-0.188	-0.2906
	-0.188	-0.2906
	-0.188	-0.2906
	-0.188	-0.2906
	-0.188	-0.2906
	-0.188	-0.3004
	-0.188	-0.3004
	-0.188	-0.2906
	-0.188	-0.2906
	-0.188	-0.2906
	-0.188	-0.2906
	-0.188	-0.3004
	-0.188	-0.3004
	-0.188	-0.2906
	-0.188	-0.2906
	-0.188	-0.2906
	-0.188	-0.2906
	-0.188	-0.3004
	-0.188	-0.2906
	-0.188	-0.3004
	-0.188	-0.2906
	-0.188	-0.2906
	-0.188	-0.2906
	-0.188	-0.2906
	-0.188	-0.2906
	-0.188	-0.2906
	-0.188	-0.2906
	-0.188	-0.2906
	-0.188	-0.2906
	-0.188	-0.2906
	-0.188	-0.2906
	-0.188	-0.3004
	-0.188	-0.2906
	-0.188	-0.2906
	-0.188	-0.2906
	-0.188	-0.2906
	-0.188	-0.2906
	-0.188	-0.3004
	-0.188	-0.2906
	-0.188	-0.2906
	-0.188	-0.2906
	-0.188	-0.3004
	-0.188	-0.2906
	-0.188	-0.2906
	-0.188	-0.2906
	-0.188	-0.2906
	-0.188	-0.2906
	-0.188	-0.2906
	-0.188	-0.2906
	-0.188	-0.3004
	-0.188	-0.2906
	-0.188	-0.2906
	-0.188	-0.2906
	-0.188	-0.2906
	-0.188	-0.2906
	-0.188	-0.2906
	-0.188	-0.2906
	-0.188	-0.2906
	-0.188	-0.2906
	-0.188	-0.2906
	-0.188	-0.2906
	-0.188	-0.2906
	-0.188	-0.2906
	-0.188	-0.2906
	-0.188	-0.2906
	-0.188	-0.3004
	-0.188	-0.2906
	-0.188	-0.3004
	-0.188	-0.2906
	-0.188	-0.3004
	-0.188	-0.2906
	-0.188	-0.2906
	-0.188	-0.2906
	-0.188	-0.2906
	-0.188	-0.2906
	-0.188	-0.3004
	-0.188	-0.2906
	-0.188	-0.2906
	-0.188	-0.2906
	-0.188	-0.2906
	-0.188	-0.2906
	-0.188	-0.2906
	-0.188	-0.2906
	-0.188	-0.2906
	-0.188	-0.2906
	-0.188	-0.3004
	-0.188	-0.2906
	-0.188	-0.2906
	-0.188	-0.2906
	-0.188	-0.2906
	-0.188	-0.2906
	-0.188	-0.2906
	-0.188	-0.2906
	-0.188	-0.2906
	-0.188	-0.2906
	-0.188	-0.2906
	-0.188	-0.2906
	-0.188	-0.3004
	-0.188	-0.2906
	-0.188	-0.2906
	-0.188	-0.2906
	-0.188	-0.2906
	-0.188	-0.2906
	-0.188	-0.2906
	-0.188	-0.2906
	-0.188	-0.2906
	-0.188	-0.2906
	-0.188	-0.2906
	-0.188	-0.2906
	-0.188	-0.3004
	-0.188	-0.2906
	-0.188	-0.2906
	-0.188	-0.2906
	-0.188	-0.2906
	-0.188	-0.2906
	-0.188	-0.3004
	-0.188	-0.2906
	-0.188	-0.3004
	-0.188	-0.2906
	-0.188	-0.2906
	-0.188	-0.2906
	-0.188	-0.2906
	-0.188	-0.2906
	-0.188	-0.2906
	-0.188	-0.2906
	-0.188	-0.2906
	-0.188	-0.2906
	-0.188	-0.2906
	-0.188	-0.2906
	-0.188	-0.2906
	-0.188	-0.3004
	-0.188	-0.2906
	-0.188	-0.2906
	-0.188	-0.2906
	-0.188	-0.2906
	-0.188	-0.2906
	-0.188	-0.2906
	-0.188	-0.2906
	-0.188	-0.2906
	-0.188	-0.3004
	-0.188	-0.2906
	-0.188	-0.2906
	-0.188	-0.2906
	-0.188	-0.3004
	-0.188	-0.2906
	-0.188	-0.2906
	-0.188	-0.2906
	-0.188	-0.3004
	-0.188	-0.2906
	-0.188	-0.2906
	-0.188	-0.3004
	-0.188	-0.2906
	-0.188	-0.2906
	-0.188	-0.2906
	-0.188	-0.3004
	-0.188	-0.2906
	-0.188	-0.2906
	-0.188	-0.2906
	-0.188	-0.2906
	-0.188	-0.2906
	-0.188	-0.2906
	-0.188	-0.2906
	-0.188	-0.2906
	-0.188	-0.2906
	-0.188	-0.2906
	-0.188	-0.3004
	-0.188	-0.2906
	-0.188	-0.2906
	-0.188	-0.2906
	-0.188	-0.2906
	-0.188	-0.2906
	-0.188	-0.2906
	-0.188	-0.2906
	-0.188	-0.2906
	-0.188	-0.2906
	-0.188	-0.2906
	-0.188	-0.2906
	-0.188	-0.2906
	-0.188	-0.2906
	-0.188	-0.2906
	-0.188	-0.2906
	-0.188	-0.2906
	-0.188	-0.2906
	-0.188	-0.2906
	-0.188	-0.2906
	-0.188	-0.2906
	-0.188	-0.2906
	-0.188	-0.2906
	-0.188	-0.2906
	-0.188	-0.2906
	-0.188	-0.2906
	-0.188	-0.2906
	-0.188	-0.2906
	-0.188	-0.2906
	-0.188	-0.2906
	-0.188	-0.2906
	-0.188	-0.2906
	-0.188	-0.2906
	-0.188	-0.2906
	-0.188	-0.2906
	-0.188	-0.2906
	-0.188	-0.2906
	-0.188	-0.2906
	-0.188	-0.2906
	-0.188	-0.2906
	-0.188	-0.2906
	-0.188	-0.2906
	-0.188	-0.2906
	-0.188	-0.2906
	-0.188	-0.3004
	-0.188	-0.2906
	-0.188	-0.2906
	-0.188	-0.2906
	-0.188	-0.2906
	-0.188	-0.2906
	-0.188	-0.2906
	-0.188	-0.2906
	-0.188	-0.2906
	-0.188	-0.2906
	-0.188	-0.2906
	-0.188	-0.2906
	-0.188	-0.2906
	-0.188	-0.2906
	-0.188	-0.3004
	-0.188	-0.2906
	-0.188	-0.2906
	-0.188	-0.2906
	-0.188	-0.3004
	-0.188	-0.2857
	-0.188	-0.2906
	-0.188	-0.2906
	-0.188	-0.2906
	-0.188	-0.2906
	-0.188	-0.2906
	-0.188	-0.2906
	-0.188	-0.2906
	-0.188	-0.2906
	-0.1832	-0.2906
	-0.188	-0.2906
	-0.188	-0.2906
	-0.188	-0.2906
	-0.1832	-0.2906
	-0.188	-0.2906
	-0.188	-0.2906
	-0.188	-0.2906
	-0.188	-0.2906
	-0.188	-0.2906
	-0.188	-0.2906
	-0.188	-0.2906
	-0.188	-0.2906
	-0.188	-0.2906
	-0.188	-0.2906
	-0.188	-0.2906
	-0.188	-0.2906
	-0.188	-0.2906
	-0.188	-0.2906
	-0.188	-0.2906
	-0.188	-0.2906
	-0.188	-0.3004
	-0.188	-0.2906
	-0.188	-0.2906
	-0.188	-0.2906
	-0.188	-0.2906
	-0.188	-0.2906
	-0.188	-0.2906
	-0.188	-0.2906
	-0.188	-0.2906
	-0.188	-0.2906
	-0.188	-0.2906
	-0.188	-0.2906
	-0.188	-0.2906
	-0.188	-0.2906
	-0.188	-0.2906
	-0.188	-0.2906
	-0.188	-0.3004
	-0.188	-0.2906
	-0.188	-0.2906
	-0.188	-0.2906
	-0.188	-0.3004
	-0.188	-0.2906
	-0.188	-0.2906
	-0.188	-0.2906
	-0.188	-0.2906
	-0.188	-0.2906
	-0.188	-0.2906
	-0.188	-0.2906
	-0.188	-0.2906
	-0.188	-0.2906
	-0.188	-0.2906
	-0.188	-0.2906
	-0.188	-0.2906
	-0.188	-0.2906
	-0.188	-0.2906
	-0.188	-0.2906
	-0.188	-0.2906
	-0.188	-0.2906
	-0.188	-0.2906
	-0.188	-0.3004
	-0.188	-0.3004
	-0.188	-0.2906
	-0.188	-0.3004
	-0.188	-0.3004
	-0.188	-0.3004
	-0.188	-0.2906
	-0.188	-0.2906
	-0.188	-0.2906
	-0.188	-0.2906
	-0.188	-0.2906
	-0.188	-0.2906
	-0.188	-0.2906
	-0.188	-0.2906
	-0.188	-0.2906
	-0.188	-0.2906
	-0.188	-0.2906
	-0.188	-0.2906
	-0.188	-0.3004
	-0.188	-0.3004
	-0.188	-0.2906
	-0.188	-0.2906
	-0.188	-0.2906
	-0.188	-0.2906
	-0.188	-0.2906
	-0.188	-0.2906
	-0.188	-0.2906
	-0.188	-0.2906
	-0.1832	-0.2906
	-0.188	-0.2906
	-0.188	-0.2906
	-0.188	-0.3004
	-0.188	-0.2906
	-0.188	-0.2906
	-0.188	-0.2906
	-0.188	-0.2906
	-0.188	-0.2906
	-0.188	-0.2906
	-0.188	-0.2906
	-0.188	-0.2906
	-0.188	-0.2906
	-0.188	-0.2906
	-0.188	-0.2906
	-0.188	-0.2906
	-0.188	-0.2906
	-0.188	-0.2906
	-0.188	-0.2906
	-0.188	-0.2906
	-0.188	-0.2906
	-0.188	-0.3004
	-0.188	-0.2906
	-0.188	-0.3004
	-0.188	-0.2906
	-0.188	-0.2906
	-0.188	-0.2906
	-0.188	-0.2906
	-0.188	-0.2906
	-0.188	-0.3004
	-0.188	-0.2906
	-0.188	-0.2906
	-0.188	-0.2906
	-0.188	-0.2906
	-0.188	-0.2906
	-0.188	-0.3004
	-0.188	-0.2906
	-0.188	-0.2906
	-0.188	-0.2906
	-0.188	-0.2906
	-0.188	-0.3004
	-0.188	-0.2906
	-0.188	-0.2906
	-0.188	-0.2906
	-0.188	-0.2906
	-0.188	-0.2906
	-0.188	-0.2906
	-0.188	-0.2906
	-0.188	-0.2906
	-0.188	-0.2906
	-0.188	-0.2906
	-0.188	-0.3004
	-0.188	-0.2906
	-0.188	-0.2906
	-0.188	-0.2906
	-0.188	-0.2906
	-0.188	-0.2906
	-0.188	-0.2906
	-0.188	-0.2906
	-0.188	-0.3004
	-0.188	-0.2906
	-0.188	-0.2906
	-0.188	-0.2906
	-0.188	-0.2906
	-0.188	-0.2906
	-0.188	-0.2906
	-0.188	-0.2906
	-0.188	-0.3004
	-0.188	-0.2906
	-0.188	-0.2906
	-0.188	-0.2906
	-0.188	-0.2906
	-0.188	-0.2906
	-0.188	-0.2906
	-0.188	-0.2906
	-0.188	-0.2906
	-0.188	-0.2906
	-0.188	-0.2906
	-0.188	-0.2906
	-0.188	-0.2906
	-0.188	-0.2906
	-0.188	-0.2906
	-0.188	-0.2906
	-0.188	-0.3004
	-0.188	-0.2906
	-0.188	-0.2906
	-0.188	-0.2906
	-0.188	-0.2906
	-0.188	-0.2906
	-0.188	-0.2906
	-0.188	-0.2906
	-0.188	-0.2906
	-0.188	-0.2906
	-0.188	-0.2906
	-0.188	-0.2906
	-0.188	-0.2906
	-0.188	-0.2906
	-0.188	-0.2906
	-0.188	-0.2906
	-0.188	-0.2906
	-0.188	-0.2906
	-0.188	-0.3004
	-0.188	-0.2906
	-0.188	-0.2906
	-0.188	-0.2906
	-0.188	-0.2906
	-0.188	-0.2906
	-0.188	-0.2906
	-0.188	-0.2906
	-0.188	-0.2906
	-0.188	-0.2906
	-0.188	-0.2906
	-0.188	-0.2906
	-0.188	-0.2906
	-0.188	-0.2906
	-0.188	-0.2906
	-0.188	-0.2906
	-0.188	-0.2906
	-0.188	-0.2906
	-0.188	-0.2906
	-0.188	-0.2906
	-0.188	-0.2906
	-0.188	-0.2906
	-0.188	-0.2906
	-0.188	-0.2906
	-0.188	-0.2906
	-0.188	-0.2906
	-0.188	-0.2906
	-0.188	-0.2906
	-0.188	-0.2906
	-0.188	-0.2906
	-0.188	-0.2906
	-0.188	-0.2906
	-0.188	-0.2906
	-0.188	-0.2906
	-0.188	-0.2906
	-0.188	-0.2906
	-0.188	-0.2906
	-0.188	-0.2906
	-0.188	-0.2906
	-0.188	-0.2906
	-0.188	-0.2906
	-0.188	-0.2906
	-0.188	-0.2906
	-0.188	-0.2906
	-0.188	-0.2906
	-0.188	-0.2906
	-0.188	-0.2906
	-0.188	-0.2906
	-0.188	-0.2906
	-0.188	-0.2906
	-0.188	-0.2906
	-0.188	-0.2906
	-0.188	-0.2906
	-0.188	-0.2906
	-0.188	-0.2906
	-0.188	-0.2906
	-0.188	-0.2906
	-0.188	-0.2906
	-0.188	-0.2906
	-0.188	-0.2906
	-0.188	-0.2906
	-0.188	-0.2906
	-0.188	-0.2906
	-0.188	-0.2906
	-0.188	-0.2906
	-0.188	-0.2906
	-0.188	-0.2906
	-0.188	-0.2906
	-0.188	-0.2906
	-0.188	-0.2906
	-0.188	-0.2906
	-0.188	-0.2906
	-0.188	-0.2906
	-0.188	-0.2906
	-0.188	-0.2906
	-0.188	-0.2906
	-0.188	-0.2906
	-0.188	-0.2906
	-0.188	-0.2906
	-0.188	-0.2906
	-0.188	-0.2906
	-0.188	-0.2906
	-0.188	-0.2906
	-0.188	-0.2906
	-0.188	-0.2906
	-0.188	-0.2906
	-0.188	-0.2906
	-0.188	-0.2906
	-0.188	-0.2906
	-0.188	-0.2906
	-0.188	-0.3004
	-0.188	-0.2906
	-0.188	-0.3004
	-0.188	-0.2906
	-0.188	-0.2906
	-0.188	-0.2906
	-0.188	-0.2906
	-0.188	-0.2906
	-0.188	-0.2906
	-0.188	-0.2906
	-0.188	-0.2906
	-0.188	-0.2906
	-0.188	-0.2906
	-0.188	-0.2906
	-0.188	-0.2906
	-0.188	-0.2906
	-0.188	-0.2906
	-0.188	-0.2906
	-0.188	-0.2906
	-0.188	-0.2906
	-0.188	-0.2906
	-0.188	-0.2906
	-0.188	-0.2906
	-0.188	-0.2906
	-0.188	-0.2906
	-0.188	-0.2906
	-0.188	-0.2906
	-0.188	-0.2906
	-0.188	-0.2906
	-0.188	-0.2906
	-0.188	-0.2906
	-0.188	-0.2906
	-0.188	-0.2906
	-0.188	-0.2906
	-0.188	-0.3004
	-0.188	-0.2906
	-0.188	-0.2906
	-0.188	-0.2906
	-0.188	-0.2906
	-0.188	-0.2906
	-0.188	-0.2906
	-0.188	-0.2906
	-0.188	-0.2906
	-0.188	-0.2906
	-0.188	-0.2906
	-0.188	-0.2906
	-0.188	-0.2906
	-0.188	-0.2906
	-0.188	-0.2906
	-0.188	-0.2906
	-0.188	-0.2906
	-0.188	-0.2906
	-0.188	-0.2906
	-0.188	-0.2906
	-0.188	-0.2906
	-0.188	-0.2906
	-0.188	-0.2906
	-0.188	-0.2906
	-0.188	-0.2906
	-0.188	-0.2906
	-0.188	-0.2906
	-0.188	-0.2906
	-0.188	-0.2906
	-0.188	-0.2906
	-0.188	-0.2906
	-0.188	-0.2906
	-0.188	-0.2906
	-0.188	-0.2906
	-0.188	-0.2906
	-0.188	-0.2906
	-0.188	-0.2906
	-0.188	-0.2906
	-0.188	-0.3004
	-0.188	-0.2906
	-0.188	-0.2906
	-0.188	-0.2906
	-0.188	-0.2906
	-0.188	-0.2906
	-0.188	-0.2906
	-0.188	-0.2906
	-0.188	-0.2906
	-0.188	-0.2906
	-0.188	-0.2906
	-0.188	-0.2906
	-0.188	-0.2906
	-0.188	-0.2906
	-0.188	-0.2906
	-0.188	-0.2906
	-0.188	-0.2906
	-0.188	-0.2906
	-0.188	-0.2906
	-0.188	-0.2906
	-0.188	-0.2906
	-0.188	-0.2906
	-0.188	-0.2906
	-0.188	-0.2906
	-0.188	-0.2906
	-0.188	-0.3004
	-0.188	-0.2906
	-0.188	-0.2906
	-0.188	-0.2906
	-0.188	-0.2906
	-0.188	-0.2906
	-0.188	-0.2906
	-0.188	-0.2906
	-0.188	-0.2906
	-0.188	-0.2906
	-0.188	-0.2906
	-0.188	-0.2906
	-0.188	-0.2906
	-0.188	-0.2906
	-0.188	-0.2906
	-0.188	-0.2906
	-0.188	-0.2906
	-0.188	-0.2906
	-0.188	-0.2906
	-0.188	-0.2906
	-0.188	-0.2906
	-0.188	-0.2906
	-0.188	-0.2906
	-0.188	-0.2906
	-0.188	-0.2906
	-0.188	-0.2906
	-0.188	-0.2906
	-0.188	-0.2906
	-0.188	-0.2906
	-0.188	-0.2906
	-0.188	-0.2906
	-0.188	-0.2906
	-0.188	-0.2906
	-0.188	-0.2906
	-0.188	-0.2906
	-0.188	-0.2906
	-0.188	-0.2906
	-0.188	-0.2906
	-0.188	-0.2906
	-0.188	-0.2906
	-0.188	-0.2906
	-0.188	-0.2906
	-0.188	-0.2906
	-0.188	-0.2906
	-0.188	-0.2906
	-0.188	-0.2906
	-0.188	-0.2906
	-0.188	-0.2906
	-0.188	-0.2906
	-0.188	-0.2906
	-0.188	-0.2906
	-0.188	-0.2906
	-0.188	-0.2906
	-0.188	-0.2906
	-0.188	-0.3004
	-0.188	-0.2906
	-0.188	-0.2906
	-0.188	-0.2906
	-0.188	-0.2906
	-0.188	-0.2906
	-0.188	-0.2906
	-0.188	-0.2906
	-0.188	-0.2906
	-0.188	-0.2906
	-0.188	-0.2906
	-0.188	-0.2906
	-0.188	-0.2906
	-0.188	-0.2906
	-0.188	-0.2906
	-0.188	-0.2906
	-0.188	-0.2906
	-0.188	-0.2906
	-0.188	-0.2906
	-0.188	-0.2906
	-0.188	-0.2906
	-0.188	-0.2906
	-0.188	-0.2906
	-0.188	-0.2906
	-0.188	-0.2906
	-0.188	-0.2906
	-0.188	-0.2906
	-0.188	-0.2906
	-0.188	-0.2906
	-0.188	-0.2906
	-0.188	-0.2906
	-0.188	-0.2906
	-0.188	-0.2906
	-0.188	-0.2906
	-0.188	-0.2906
	-0.188	-0.2906
	-0.188	-0.2906
	-0.188	-0.2906
	-0.188	-0.2906
	-0.188	-0.2906
	-0.188	-0.2906
	-0.188	-0.2906
	-0.188	-0.2906
	-0.188	-0.2906
	-0.188	-0.2906
	-0.188	-0.2906
	-0.188	-0.2906
	-0.188	-0.2906
	-0.188	-0.2906
	-0.188	-0.2906
	-0.188	-0.2906
	-0.188	-0.2906
	-0.188	-0.2906
	-0.188	-0.2906
	-0.188	-0.2906
	-0.188	-0.2906
	-0.188	-0.2906
	-0.188	-0.2906
	-0.188	-0.2906
	-0.188	-0.2906
	-0.188	-0.2906
	-0.188	-0.2906
	-0.188	-0.2906
	-0.188	-0.2906
	-0.188	-0.2906
	-0.188	-0.2906
	-0.188	-0.2906
	-0.188	-0.2906
	-0.188	-0.2906
	-0.188	-0.2906
	-0.188	-0.2906
	-0.188	-0.2906
	-0.188	-0.2906
	-0.188	-0.2906
	-0.188	-0.2906
	-0.188	-0.2906
	-0.188	-0.2906
	-0.188	-0.2906
	-0.188	-0.2906
	-0.188	-0.2906
	-0.188	-0.2906
	-0.188	-0.2906
	-0.188	-0.2906
	-0.188	-0.2906
	-0.188	-0.2906
	-0.188	-0.2906
	-0.188	-0.2906
	-0.188	-0.2906
	-0.188	-0.2906
	-0.188	-0.2906
	-0.188	-0.2906
	-0.188	-0.2906
	-0.188	-0.2906
	-0.188	-0.2906
	-0.188	-0.2906
	-0.188	-0.2906
	-0.188	-0.2906
	-0.188	-0.2906
	-0.188	-0.2906
	-0.188	-0.2906
	-0.188	-0.2906
	-0.188	-0.2906
	-0.188	-0.2906
	-0.188	-0.2906
	-0.188	-0.2906
	-0.188	-0.2906
	-0.188	-0.2906
	-0.188	-0.2906
	-0.188	-0.2906
	-0.188	-0.2906
	-0.188	-0.2906
	-0.188	-0.2906
	-0.188	-0.2906
	-0.188	-0.2906
	-0.188	-0.2906
	-0.188	-0.2906
	-0.188	-0.2906
	-0.188	-0.2906
	-0.188	-0.2906
	-0.188	-0.2906
	-0.188	-0.2906
	-0.188	-0.2906
	-0.188	-0.2906
	-0.188	-0.2906
	-0.188	-0.2906
	-0.188	-0.2906
	-0.188	-0.2906
	-0.188	-0.2906
	-0.188	-0.2906
	-0.188	-0.2906
	-0.188	-0.2906
	-0.188	-0.2906
	-0.188	-0.2906
	-0.188	-0.2906
	-0.188	-0.2906
	-0.188	-0.2906
	-0.188	-0.2906
	-0.188	-0.2906
	-0.188	-0.2906
	-0.188	-0.2906
	-0.188	-0.2906
	-0.188	-0.2906
	-0.188	-0.2906
	-0.188	-0.2906
	-0.188	-0.2906
	-0.188	-0.2857
	-0.188	-0.2906
	-0.188	-0.2906
	-0.188	-0.2906
	-0.188	-0.2906
	-0.188	-0.2906
	-0.188	-0.2906
	-0.188	-0.2906
	-0.188	-0.2906
	-0.188	-0.2906
	-0.188	-0.2906
	-0.188	-0.2906
	-0.188	-0.2906
	-0.188	-0.2906
	-0.188	-0.2906
	-0.188	-0.2906
	-0.188	-0.2906
	-0.188	-0.2906
	-0.188	-0.2906
	-0.188	-0.2906
	-0.188	-0.2906
	-0.188	-0.2906
	-0.188	-0.2906
	-0.188	-0.2906
	-0.188	-0.2906
	-0.188	-0.2906
	-0.188	-0.2906
	-0.188	-0.2906
	-0.188	-0.2906
	-0.188	-0.2906
	-0.188	-0.2906
	-0.188	-0.2906
	-0.188	-0.2906
	-0.188	-0.2906
	-0.188	-0.2906
	-0.188	-0.2906
	-0.188	-0.2906
	-0.188	-0.2906
	-0.188	-0.2906
	-0.188	-0.2906
	-0.188	-0.2906
	-0.188	-0.2906
	-0.188	-0.2906
	-0.188	-0.2906
	-0.188	-0.2906
	-0.188	-0.2906
	-0.188	-0.2857
	-0.188	-0.2906
	-0.188	-0.2906
	-0.188	-0.2906
	-0.188	-0.2906
	-0.188	-0.2906
	-0.188	-0.2857
	-0.188	-0.2906
	-0.188	-0.2906
	-0.188	-0.2857
	-0.188	-0.2906
	-0.188	-0.2857
	-0.188	-0.2906
	-0.188	-0.2906
	-0.188	-0.2906
	-0.188	-0.2906
	-0.188	-0.2906
	-0.188	-0.2906
	-0.188	-0.2906
	-0.188	-0.2906
	-0.188	-0.2906
	-0.188	-0.2906
	-0.188	-0.2906
	-0.188	-0.2906
	-0.188	-0.2906
	-0.188	-0.2857
	-0.188	-0.2906
	-0.188	-0.2906
	-0.188	-0.2906
	-0.188	-0.2906
	-0.188	-0.2906
	-0.188	-0.2906
	-0.188	-0.2906
	-0.188	-0.2906
	-0.188	-0.2857
	-0.188	-0.2906
	-0.188	-0.2906
	-0.188	-0.2906
	-0.188	-0.2906
	-0.188	-0.2906
	-0.188	-0.2906
	-0.188	-0.2906
	-0.188	-0.2906
	-0.188	-0.2857
	-0.188	-0.2857
	-0.188	-0.2906
	-0.188	-0.2906
	-0.188	-0.2906
	-0.188	-0.2857
	-0.188	-0.2906
	-0.188	-0.2906
	-0.188	-0.2857
	-0.188	-0.2906
	-0.188	-0.2857
	-0.188	-0.2906
	-0.188	-0.2906
	-0.188	-0.2906
	-0.188	-0.2857
	-0.188	-0.2857
	-0.188	-0.2906
	-0.188	-0.2857
	-0.188	-0.2906
	-0.188	-0.2906
	-0.188	-0.2906
	-0.188	-0.2906
	-0.188	-0.2906
	-0.188	-0.2906
	-0.188	-0.2857
	-0.188	-0.2906
	-0.188	-0.2857
	-0.188	-0.2906
	-0.188	-0.2857
	-0.188	-0.2906
	-0.188	-0.2906
	-0.188	-0.2906
	-0.188	-0.2857
	-0.188	-0.2857
	-0.188	-0.2857
	-0.188	-0.2906
	-0.188	-0.2906
	-0.188	-0.2906
	-0.188	-0.2906
	-0.188	-0.2857
	-0.188	-0.2857
	-0.188	-0.2857
	-0.188	-0.2857
	-0.188	-0.2857
	-0.188	-0.2857
	-0.188	-0.2906
	-0.188	-0.2857
	-0.188	-0.2857
	-0.188	-0.2857
	-0.188	-0.2857
	-0.188	-0.2857
	-0.188	-0.2906
	-0.188	-0.2906
	-0.188	-0.2857
	-0.188	-0.2857
	-0.188	-0.2906
	-0.188	-0.2857
	-0.188	-0.2857
	-0.188	-0.2857
	-0.188	-0.2857
	-0.188	-0.2857
	-0.188	-0.2857
	-0.188	-0.2857
	-0.188	-0.2857
	-0.188	-0.2906
	-0.188	-0.2857
	-0.188	-0.2857
	-0.188	-0.2857
	-0.1832	-0.2906
	-0.188	-0.2857
	-0.188	-0.2857
	-0.188	-0.2906
	-0.188	-0.2857
	-0.188	-0.2906
	-0.188	-0.2857
	-0.188	-0.2857
	-0.188	-0.2857
	-0.188	-0.2906
	-0.188	-0.2857
	-0.188	-0.2906
	-0.188	-0.2857
	-0.188	-0.2857
	-0.188	-0.2857
	-0.188	-0.2857
	-0.188	-0.2857
	-0.188	-0.2857
	-0.188	-0.2857
	-0.188	-0.2906
	-0.188	-0.2857
	-0.188	-0.2857
	-0.188	-0.2857
	-0.188	-0.2857
	-0.188	-0.2857
	-0.188	-0.2857
	-0.188	-0.2857
	-0.188	-0.2857
	-0.188	-0.2857
	-0.188	-0.2857
	-0.188	-0.2857
	-0.188	-0.2906
	-0.188	-0.2857
	-0.188	-0.2857
	-0.188	-0.2857
	-0.188	-0.2906
	-0.188	-0.2857
	-0.188	-0.2906
	-0.188	-0.2857
	-0.188	-0.2906
	-0.188	-0.2857
	-0.188	-0.2857
	-0.188	-0.2857
	-0.188	-0.2857
	-0.188	-0.2857
	-0.188	-0.2857
	-0.188	-0.2857
	-0.188	-0.2857
	-0.188	-0.2857
	-0.188	-0.2857
	-0.188	-0.2857
	-0.188	-0.2857
	-0.188	-0.2857
	-0.188	-0.2857
	-0.188	-0.2857
	-0.188	-0.2857
	-0.188	-0.2857
	-0.188	-0.2857
	-0.188	-0.2857
	-0.188	-0.2906
	-0.188	-0.2857
	-0.188	-0.2857
	-0.188	-0.2857
	-0.188	-0.2857
	-0.188	-0.2857
	-0.188	-0.2857
	-0.188	-0.2857
	-0.188	-0.2857
	-0.188	-0.2857
	-0.188	-0.2857
	-0.188	-0.2857
	-0.188	-0.2857
	-0.188	-0.2857
	-0.188	-0.2857
	-0.188	-0.2857
	-0.188	-0.2857
	-0.188	-0.2857
	-0.188	-0.2857
	-0.188	-0.2857
	-0.188	-0.2857
	-0.188	-0.2857
	-0.188	-0.2857
	-0.188	-0.2857
	-0.188	-0.2857
	-0.188	-0.2857
	-0.188	-0.2857
	-0.188	-0.2857
	-0.188	-0.2857
	-0.188	-0.2857
	-0.188	-0.2857
	-0.188	-0.2857
	-0.188	-0.2857
	-0.188	-0.2857
	-0.188	-0.2857
	-0.188	-0.2857
	-0.188	-0.2857
	-0.188	-0.2857
	-0.188	-0.2857
	-0.188	-0.2857
	-0.188	-0.2857
	-0.188	-0.2857
	-0.188	-0.2857
	-0.188	-0.2857
	-0.188	-0.2857
	-0.188	-0.2857
	-0.188	-0.2857
	-0.188	-0.2857
	-0.188	-0.2857
	-0.188	-0.2857
	-0.188	-0.2857
	-0.188	-0.2857
	-0.188	-0.2857
	-0.188	-0.2857
	-0.188	-0.2857
	-0.188	-0.2857
	-0.188	-0.2857
	-0.188	-0.2857
	-0.188	-0.2857
	-0.188	-0.2857
	-0.1832	-0.2857
	-0.188	-0.2857
	-0.1832	-0.2857
	-0.188	-0.2857
	-0.188	-0.2857
	-0.188	-0.2857
	-0.188	-0.2857
	-0.188	-0.2857
	-0.188	-0.2808
	-0.188	-0.2857
	-0.188	-0.2857
	-0.188	-0.2857
	-0.188	-0.2857
	-0.188	-0.2857
	-0.188	-0.2857
	-0.188	-0.2857
	-0.188	-0.2857
	-0.188	-0.2857
	-0.188	-0.2857
	-0.188	-0.2857
	-0.1832	-0.2857
	-0.188	-0.2857
	-0.188	-0.2857
	-0.188	-0.2857
	-0.188	-0.2857
	-0.188	-0.2808
	-0.188	-0.2857
	-0.188	-0.2857
	-0.188	-0.2857
	-0.188	-0.2857
	-0.188	-0.2857
	-0.188	-0.2857
	-0.188	-0.2808
	-0.188	-0.2857
	-0.188	-0.2857
	-0.188	-0.2857
	-0.1832	-0.2857
	-0.188	-0.2857
	-0.188	-0.2857
	-0.188	-0.2857
	-0.188	-0.2857
	-0.188	-0.2857
	-0.188	-0.2808
	-0.188	-0.2808
	-0.188	-0.2808
	-0.188	-0.2857
	-0.188	-0.2857
	-0.188	-0.2808
	-0.188	-0.2808
	-0.188	-0.2857
	-0.188	-0.2857
	-0.188	-0.2857
	-0.188	-0.2857
	-0.188	-0.2857
	-0.188	-0.2857
	-0.188	-0.2857
	-0.188	-0.2857
	-0.188	-0.2808
	-0.1832	-0.2857
	-0.188	-0.2808
	-0.188	-0.2857
	-0.188	-0.2857
	-0.188	-0.2857
	-0.188	-0.2808
	-0.188	-0.2857
	-0.188	-0.2857
	-0.188	-0.2857
	-0.188	-0.2808
	-0.1832	-0.2857
	-0.188	-0.2808
	-0.188	-0.2857
	-0.188	-0.2808
	-0.188	-0.2857
	-0.188	-0.2857
	-0.188	-0.2857
	-0.188	-0.2857
	-0.188	-0.2857
	-0.188	-0.2857
	-0.188	-0.2808
	-0.188	-0.2808
	-0.188	-0.2808
	-0.188	-0.2857
[truncated: 10,411 more rows]
