# Supplementary material for: Hsf1 and the molecular chaperone Hsp90 support a ‘rewiring stress response’ leading to an adaptive cell size increase in chronic stress
Source: eLife. 2023 Dec 7;12:RP88658. doi: 10.7554/eLife.88658 (PMC10703448; doi:10.7554/eLife.88658)
Supplement: Figure 7—figure supplement 1—source data 1. [file elife-88658-fig7-figsupp1-data1.xlsx]

## Sheet: Fig7–FigSuppl1
A		WT				Alpha KO				Beta KO
	HEK	1	1	1	1	0.910407	0.993305	1.05175	0.974908	1.27303	0.983987	1.08352	1.38522
	A549	1	1	1	1	1.06905	0.828187	0.801075	0.95683	0.713962	0.772518	1.55589	1.86192
B		WT				Alpha KO				Beta KO
	HEK	1	1	1	1	0.98396	1.04104	0.989329	1.10631	0.966598	1.14749	0.976036	1.04898
	A549	1	1	1		0.98396	1.79479	1.15625		0.966598	0.704513	1.15367
C
	WT						Alpha KO						Beta KO
C	13	14	15	16	14	15	11	13	13	15	14	17	9	13	13	18	14	13
HS	15	23	26	18	18	27	51	61	33	63	42	49	33	49	33	37	24	41
