# Supplementary material for: Hsf1 and the molecular chaperone Hsp90 support a ‘rewiring stress response’ leading to an adaptive cell size increase in chronic stress
Source: eLife. 2023 Dec 7;12:RP88658. doi: 10.7554/eLife.88658 (PMC10703448; doi:10.7554/eLife.88658)
Supplement: Figure 7—source data 1. [file elife-88658-fig7-data1.xlsx]

## Sheet: Fig. 7
7A
	WT				Hsp90alpha KO				Hsp90beta KO
HEK	1	1	1	1	0.88	0.839	0.747	0.883	0.806	0.915	0.787	0.680454
A549	1	1	1	1	0.865264	0.646499	0.700215	0.869051	0.6823	0.666263	0.589554	0.680454
7B	WT				Hsp90alpha KO				Hsp90beta KO
HEK	1	1	1	1	0.847	0.855	0.883	0.874	0.809	0.66	0.767	0.595
A549	1	1	1	1	0.701224	0.791887	0.637435	0.655222	0.686392	0.987744	0.571225	0.470435
7C
	WT			90aKO			90bKO
HEK	1	1		0.72723	0.732538		0.817512	0.530679
