# Supplementary material for: Hsf1 and the molecular chaperone Hsp90 support a ‘rewiring stress response’ leading to an adaptive cell size increase in chronic stress
Source: eLife. 2023 Dec 7;12:RP88658. doi: 10.7554/eLife.88658 (PMC10703448; doi:10.7554/eLife.88658)
Supplement: Figure 8—figure supplement 1—source data 1. [file elife-88658-fig8-figsupp1-data1.xlsx]

## Sheet: Fig8–FigSuppl1
A	A549	Cell Size				Total proteins
	WT	1	1	1	1	1	1	1	1
	WT CDKi	1.4	1.58	1.72	1.42	1.8	2.1	2.2	1.6
	Alpha KO	1	1	1	1	1	1	1	1
	Alpha KO CDKi	1.4	1.68	1.52	1.71	1.9	2.3	1.6	2.2
	Beta KO	1	1	1	1	1	1	1	1
	Beta KO CDKi	1.52	1.73	1.6	1.53	1.7	2.4	2.2	2.6
C	A549	Cell Size			Cell death
	WT arsenite	103	106	98	32.1	28.5	25.9
	WT CDKi + arsenite	188	169	178	5.2	11.3	4.1
	Alpha KO arsenite	108	107	111	83.4	97.2	89.3
	Alpha KO CDKi + arsenite	174	193	190	58.1	62.8	62.9
	Beta KO arsenite	106	110	108	76.8	82.1	88.2
	Beta KO CDKi + arsenite	188	170	154	44.8	59.2	42.7
	RPE1
	arsenite	104	106	98	70.4	62.6	66.8
	CDKi + arsenite	188	169	178	18.8	14.3	28.5
D
	HEK	Cell Size			Cell death
	WT	100	100	100	0	0	0
	WT rapa	91	93	94	4.6	8.4	9.2
	WT HS	115	122	128	7.8	8.8	7.1
	WT rapa + HS	119	121	117	38.4	39.9	32
	WT HS adapted + Rapa	126	122	132	38.4	33.4	45.3
	Alpha KO	100	100	100	0	0	0
	Alpha KO rapa	88	96	93	7.9	12.7	8.2
	Alpha HS	123	124	131	55.2	49.1	58.3
	Alpha KO rapa +HS	123	116	128	36.2	32.2	39.1
	Alpha HS adapted + Rapa	128	127	132	36.2	32.8	38.2
	Beta KO	100	100	100	0	0	0
	Beta KO rapa	84	95	101	5.4	5.6	6.1
	Beta KO HS	122	129	131	47.3	54.9	52.4
	Beta KO rapa + HS	121	116	129	33.1	28.2	38.8
	Beta KO HS adapted + Rapa	123	128	134	29.1	36.3	33.8
E
	A549	Cell Size			Cell death
	WT	100	100	100	5.55	5.4	4.1
	WT serum starved	79	83	86	1.1	2.4	1.9
	WT HS	162.4	154.9	168	13.5	10.8	9.2
	WT Serum starved then HS	118	126	132	52.7	58.1	48.9
	WT HS adapted then serum starved	130	138	150	24.8	34.9	38.2
	Alpha KO	100	100	100	5.4	4.9	4.5
	Alpha serum starved	78	89	84	1.6	1.5	2.1
	Alpha HS	168	172	176	61.5	52.8	68.2
	Alpha KO serum starved then HS	121	129	133	43.9	50.8	58.1
	Alpha KO HS adapted serum starved	118	138	141	46.4	48.8	58.1
	Beta KO	100	100	100	5.3	4.9	3.1
	Beta KO serum starved	82	84	78	2.3	1.9	1.3
	Beta KO HS	166	178	169	66	52.1	58.2
	Beta KO serum starved then HS	137	128	132	33.2	41.1	34.5
	Beta KO HS adapted serum starved	122	133	124	41.6	38.2	35.9
F
	A549	Cell Size			Cell death
	WT ars	102	101	99	5.28	3.9	4.1
	WT CHX + ars	71	68	41	48.8	38.3	34.7
	WT + rapa + ars	76	78	82	38.3	42.1	32.9
	Alpha KO ars	101	104	102	12.8	13.9	14.6
	Alpha KO CHX + ars	68	59	46	37.4	41.7	33.9
	Alpha KO + rapa + ars	65	76	71	43.3	25.8	38.2
	Beta KO ars	104	98	102	10.9	14.1	12.5
	Beta KO CHX + ars	65	76	46	19.8	46.1	38.2
	Beta KO + rapa + ars	63	79	86	35.9	19.7	24.2
	RPE1
	RPE1 ars	106	104	106	9.5	10.2	8.5
	RPE1 CHX + Ars	63	78	71	27.2	19.3	33.5
	RPE1 + rapa + ars	82	88	81	33.9	38.2	27.9
