# Supplementary material for: Hsf1 and the molecular chaperone Hsp90 support a ‘rewiring stress response’ leading to an adaptive cell size increase in chronic stress
Source: eLife. 2023 Dec 7;12:RP88658. doi: 10.7554/eLife.88658 (PMC10703448; doi:10.7554/eLife.88658)
Supplement: Figure 8—source data 1. [file elife-88658-fig8-data1.xlsx]

## Sheet: Fig. 8
8B		Cell Size			Cell death
	WT	100	100	100	0	0	0
	WT CDKi	166	172	163	4.8	6.3	6.6
	WT HS	143	155	158	4.7	10.1	8.8
	WT CDKi HS	173	178	169	11.1	8.5	13.2
	Alpha KO	100	100	100	0	0	0
	Alpha KO CDKi	172	159	168	3.9	5.6	6.1
	Alpha KO HS	173	167	158	68.8	72.2	65.2
	Alpha KO CDKi HS	181	173	169	36.9	39.8	41.6
	Beta KO	100	100	100	0	0	0
	Beta KO CDKi	168	170	154	2.9	8.8	4.2
	Beta KO HS	156	167	158	66.8	52.1	58.2
	Beta KO CDKi HS	188	170	165	35.8	29.2	32.7
8C
		Cell Size			Cell death
	WT	100	100	100	0	0	0
	WT rapa	85	84	88	7.9	10.7	6.6
	WT HS	162.4	154.9	168	8.5	10.8	9.2
	WT rapa + HS	138	133	129	42.9	37.8	33.4
	WT HS adapted + Rapa	146	133	143	51.1	43.4	41
	Alpha KO	100	100	100	0	0	0
	Alpha KO rapa	87	93	88	9.4	8.9	7.1
	Alpha HS	168	172	176	61.5	72.8	68.2
	Alpha KO rapa +HS	122	131	137	43.8	38.9	35.8
	Alpha HS adapted + Rapa	138	147	129	55	48.4	42.2
	Beta KO	100	100	100	0	0	0
	Beta KO rapa	85	89	88	8.6	4.3	6.6
	Beta KO HS	166	178	169	66	52.1	58.2
	Beta KO rapa + HS	127	122	141	37	36.2	32.2
	Beta KO HS adapted + Rapa	142	151	144	51.4	56.2	43.7
8F
		Cell Size				PI positive
	37 day 0 low	100	100	100	100	0	0	0	0
	37 d 4 low	103	99	106	102	1.1	0.99	1.9	0.86
	37 d 7 low	72	77	82	71	1.2	0.98	1.1	1.9
	37 day 0 high	85	78	83	76	1.2	1.4	0.98	1.1
	37 day 4 high	71	76	68	66	2.1	1.8	1.3	2.2
	37 day 7 high	58	67	62	58	2.2	1.9	2.7	2.4
	40°C D 0	100	100	100	100	1.1	0.99	1.8	1.3
	40 °C D 4 low	144.4	142	152	158	4.3	8.81	9.6	9.9
	40 °C D 7 low	172	164	158	169	8.1	14.81	13.2	9.9
	40 °C D 4d high	122	131	119	137	15.2	19.1	19.3	21.2
	40 °C D 7 high	89	97	88	83	58.4	46.3	62.8	55.3
