# Supplementary material for: Hsf1 and the molecular chaperone Hsp90 support a ‘rewiring stress response’ leading to an adaptive cell size increase in chronic stress
Source: eLife. 2023 Dec 7;12:RP88658. doi: 10.7554/eLife.88658 (PMC10703448; doi:10.7554/eLife.88658)
Supplement: Figure 9—source data 2. [file elife-88658-fig9-data2.xlsx]

## Sheet: Fig. 9
		Total proteins in HEK Hsp90 alpha KO
	mcherry	0.562233	0.6836	0.5792
	mcherry hsp90 a	0.982071	0.839827	0.983765
	EGFP	0.506671	0.476843	0.584763
	EGFP-Hsp90 b	1.01866	0.983765	1.00384
		Total Hsp90 in HEK Hsp90 alpha KO
	mcherry	1	1	1
	mcherry hsp90 a	1.83454	2.56363	1.92337
	EGFP	1	1	1
	EGFP-Hsp90 b	2.73392	1.99835	2.50379
		Total proteins in HEK Hsp90 beta KO
	mcherry	0.542982	0.498238	0.593282
	mcherry hsp90 a	1.05679	1.02982	0.998273
	EGFP	0.610918	0.603929	0.536274
	EGFP-Hsp90 b	0.889261	1.09384	0.998273
		Total Hsp90 in HEK Hsp90 beta KO
	mcherry	1	1	1
	mcherry hsp90 a	3.63011	3.98348	2.18373
	EGFP	1	1	1
	EGFP-Hsp90 b	3.74522	2.74837	3.64725
