# Supplementary material for: Hsf1 and the molecular chaperone Hsp90 support a ‘rewiring stress response’ leading to an adaptive cell size increase in chronic stress
Source: eLife. 2023 Dec 7;12:RP88658. doi: 10.7554/eLife.88658 (PMC10703448; doi:10.7554/eLife.88658)
Supplement: Figure 10—source data 1. [file elife-88658-fig10-data1.xlsx]

## Sheet: Fig. 10
10A
	Control				10 days				20 days
	100	100	100	100	203	240	303	290	376	402	440	483
10 C
	Control			15 days			30 days
	65.5	68.4	67.9	72.4	75.3	77.4	91.1	88.2	95.8
10 E
	Control			15 days			30 days
	0.67	0.88	0.92	0.89	0.87	1.01	5.8	4.9	8.54
		Cell Size					Protein concentration
	Days
	1	1	1	1	1	1	1	1	1	1	1
	7	1.21896	1.3202	1.29178	1.01786	0.980447	1.02376	1.28924	1.67237	1.57236	1.10287
	14	1.38764	1.42168	1.31823	1.19288	1.18728	1.56751	1.19824	1.74835	1.74151	1.39238
	21	1.59862	1.58764	1.38237	1.26173	1.29826	1.40767	1.27895	1.74286	1.73918	1.38917
	28	1.62388	2.02913	1.82387	1.52875	2.11982	1.52983	1.19878	1.62388	1.72986	1.41918
