# Supplementary material for: Hsf1 and the molecular chaperone Hsp90 support a ‘rewiring stress response’ leading to an adaptive cell size increase in chronic stress
Source: eLife. 2023 Dec 7;12:RP88658. doi: 10.7554/eLife.88658 (PMC10703448; doi:10.7554/eLife.88658)
Supplement: Source data 1. [file elife-88658-data1.xlsx]

## Sheet: Description of included data
	A subset of the proteomic data of WT and Hsp90α/β KO HEK293T cells. The main and first tab of the Excel file contains all of the unfiltered proteomic data. The following abbreviations (column headers) are used: 37C-WT, WT cells cultured at 37 °C; 39C-1d-WT, WT cells cultured at 39 °C for 1 day; 39C-4d-WT, WT cells cultured at 39 °C for 4 days; 37C-a-KO, Hsp90α KO cells cultured at 37 °C, 39C-1d-a…

## Sheet: proteomics original data 
#!{Type}E	E		E	E	E	E	E	E	E	E	E	E	E	E	E	E	E	E	E	E	E	E	E	E	E	E	Average	Average	Average	Average	Average	Average	Average	Average	Average		Student's T-test q-value 37C-WT_39C-4d-WT		Student's T-test q-value 37C-WT_39C-1d-WT			Student's T-test q-value 37C-a-KO_39C-4d-a-KO		Student's T-test q-value 37C-a-KO_39C-1d-a-KO			Student's T-test q-value 37C-b-KO_39C-4d-b-KO		Student's T-test q-value 37C-b-KO_39C-1d-b-KO
37C-b-KO	37C-b-KO	37C-b-KO	39C-1d-b-KO	39C-1d-b-KO	39C-1d-b-KO	39C-4d-b-KO	39C-4d-b-KO	39C-4d-b-KO	37C-a-KO	37C-a-KO	37C-a-KO	39C-1d-a-KO	39C-1d-a-KO	39C-1d-a-KO	39C-4d-a-KO	39C-4d-a-KO	39C-4d-a-KO	37C-WT	37C-WT	37C-WT	39C-1d-WT	39C-1d-WT	39C-1d-WT	39C-4d-WT	39C-4d-WT	39C-4d-WT	B-KO-37	B-KO-39-1d	B-KO-39-4d	a-KO-37	a-KO-39-1d	a-KO-39-4d	WT-37	WT-39-1d	WT-39-4d	W-394d - 37		W-391d-37			a-394d - 37		a-391d - 37			b-394d -37		b-391d-37
1.35555	1.46654	1.29417	1.55859	1.70294	1.60846	1.69571	1.7704	1.74544	1.16987	1.18995	1.23632	1.4974	1.29331	1.32994	1.75881	1.878	1.79657	1.45446	1.41869	1.33833	1.44776	1.45078	1.1793	1.43951	1.21411	1.40605	1.37209	1.62333	1.73718	1.19871	1.37355	1.81112	1.40383	1.35928	1.35322	-0.0506044	0.606032	-0.0445498	0.752555		0.61241	0.000249716	0.174836	0.0537145		0.365094	0.00213116	0.251238	0.02717
-1.41425	-1.50873	-1.2652	-2.05406	-2.22203	-2.15373	-2.57337	-2.46503	-2.52205	-1.25841	-0.976213	-1.10231	-2.00046	-2.14706	-1.76317	-1.87533	-1.93031	-2.05625	-1.232	-1.45868	-1.55645	-1.83973	-2.11797	-1.54747	-2.25636	-1.85193	-1.89238	-1.39606	-2.14327	-2.52015	-1.11231	-1.97023	-1.95396	-1.41571	-1.83505	-2.00022	-0.584511	0.0141777	-0.419343	0.0656856		-0.841654	0.00092278	-0.857921	0.00763306		-1.12409	0.000367953	-0.747212	0.00499439
1.70573	1.61214	1.64109	1.41961	1.37965	1.39232	1.65753	1.63596	1.71468	1.72979	1.79083	1.73282	1.50479	1.47376	1.35902	1.92958	1.85299	1.92866	1.6486	1.5929	1.60857	1.40455	1.55037	1.33928	1.78568	1.66287	1.80559	1.65299	1.39719	1.66939	1.75115	1.44586	1.90375	1.61669	1.4314	1.75138	0.134692	0.0267667	-0.185285	0.0325458		0.1526	0.00491738	-0.305287	0.00758644		0.0164045	0.774474	-0.255795	0.0056259
0.480125	0.451978	0.518202	0.554758	0.658546	0.592527	0.739088	0.834162	0.788449	0.650294	0.632621	0.668869	0.546343	0.503313	0.464531	0.952032	0.977111	0.966756	0.410915	0.355372	0.361365	0.0826547	0.291699	0.138699	0.695787	0.619387	0.646564	0.483435	0.601944	0.787233	0.650595	0.504729	0.9653	0.375884	0.171018	0.653913	0.278029	0.00094691	-0.204866	0.0246382		0.314705	0.000296296	-0.145866	0.00964341		0.303798	0.0011265	0.118509	0.0376077
-0.848715	-0.675547	-0.821596	-0.650717	-0.672607	-0.83123	-1.34485	-1.81802	-1.368	-0.674183	-0.841563	-0.656981	-0.495986	-0.800045	-0.493808	-1.08578	-0.953588	-1.05327	-1.06001	-0.697586	-0.919615	-0.614048	-0.508147	-0.718778	-0.906224	-1.03904	-0.862246	-0.781952	-0.718185	-1.51029	-0.724242	-0.596613	-1.03088	-0.892403	-0.613658	-0.935836	-0.0434331	0.829005	0.278745	0.0593413		-0.306637	0.00619155	0.127629	0.332851		-0.728336	0.00714232	0.0637675	0.507542
-1.18976	-1.16435	-1.51396	-1.87162	-1.64082	-1.67956	-1.25615	-0.996581	-1.42802	-1.59621	-1.23334	-1.52933	-1.58547	-1.53479	-1.80412	-1.17818	-1.21424	-1.36109	-1.78212	-1.69896	-1.4611	-1.4899	-1.84279	-1.32099	-1.20334	-1.68762	-1.42868	-1.28936	-1.73067	-1.22692	-1.45296	-1.64146	-1.25117	-1.64739	-1.55123	-1.43988	0.20751	0.209132	0.0961641	0.703986		0.201792	0.0902394	-0.188498	0.233091		0.0624396	0.82925	-0.44131	0.0373225
1.02209	1.02506	0.959864	1.04662	0.946777	0.961059	0.925455	0.799132	0.843244	0.884386	0.856406	0.998957	0.892097	0.973561	0.749504	0.96279	0.715579	1.01494	0.68277	0.565327	0.603614	0.466689	0.824882	0.422337	0.35112	0.303101	0.407164	1.00234	0.984819	0.855944	0.91325	0.871721	0.89777	0.617237	0.571303	0.353795	-0.263442	0.00460658	-0.0459342	0.825024		-0.0154796	0.942886	-0.0415291	0.707902		-0.146394	0.0147914	-0.0175188	0.750145
1.09432	1.13443	1.20009	1.20141	1.33577	1.24465	1.04891	1.03165	1.17519	0.908177	1.07122	1.03991	1.3139	1.09845	1.0514	1.04865	0.984487	1.03481	1.22147	1.17438	1.20943	1.32047	1.33508	0.982359	1.06483	0.978401	1.17075	1.14294	1.26061	1.08525	1.00644	1.15458	1.02265	1.20176	1.21264	1.07133	-0.130432	0.047019	0.0108778	0.959101		0.016212	0.878752	0.148148	0.17781		-0.0576935	0.268524	0.117666	0.0810435
0.0189369	0.0721018	0.298303	0.200195	0.161786	0.16532	0.371956	0.282102	0.214228	0.100882	-0.0736613	0.262087	0.0821636	0.341053	0.164872	0.443625	0.325392	0.433414	5.65052e-05	0.187421	0.374355	0.247112	0.217378	0.326838	0.57889	0.380017	0.4204	0.129781	0.175767	0.289429	0.0964359	0.196029	0.40081	0.187277	0.263776	0.459769	0.272491	0.0514747	0.0764987	0.590173		0.304374	0.0188569	0.0995936	0.500648		0.159648	0.103598	0.0459864	0.703882
0.638339	0.513732	0.657422	1.28401	0.899243	0.764458	1.93221	1.99834	2.00411	0.725278	0.773535	0.621977	0.856313	0.977538	0.930996	1.57881	1.82471	1.77865	0.557727	0.405188	0.498641	0.180855	0.181013	-0.150369	1.73131	1.65063	1.58196	0.603164	0.982572	1.97822	0.70693	0.921615	1.72739	0.487185	0.0704995	1.65463	1.16745	0.000435088	-0.416686	0.0181425		1.02046	0.000341287	0.214685	0.0233718		1.37506	0	0.379408	0.0812547
-3.57297	-3.1711	-3.54689	-3.46353	-2.90232	-3.04032	-3.01812	-3.16119	-2.87841	-2.38642	-3.55807	-2.77307	-2.81568	-2.83761	-2.32688	-2.4083	-2.653	-2.47332	-4.22236	-2.7939	-3.35772	-2.71681	-2.8794	-2.37175	-2.62582	-2.63847	-3.31206	-3.43032	-3.13539	-3.01924	-2.90586	-2.66005	-2.51154	-3.45799	-2.65599	-2.85879	0.599207	0.193228	0.802006	0.106477		0.394318	0.210811	0.245804	0.623124		0.41108	0.0295394	0.294926	0.238192
1.34019	1.22354	1.20467	1.15493	1.15226	0.925891	1.45803	1.56884	1.34535	1.53069	1.43725	1.52824	1.61066	1.56829	1.51289	1.85318	1.92215	1.9207	0.687277	0.61979	0.703612	1.06384	0.876027	1.20448	1.08803	1.5583	1.5259	1.25613	1.07769	1.45741	1.49873	1.56395	1.89868	0.670226	1.04812	1.39075	0.72052	0.00747507	0.37789	0.0140465		0.399953	0.000681902	0.0652227	0.177705		0.201271	0.0317274	-0.178442	0.108482
1.32456	1.27912	1.21313	0.986198	0.985247	1.02673	1.23321	1.26519	1.31643	0.95841	0.989512	1.04221	0.754114	0.864513	0.676384	1.22534	1.1986	1.26754	1.18595	1.1694	1.21301	1.06225	1.10089	1.06057	1.10223	1.04451	1.09288	1.27227	0.999391	1.27161	0.99671	0.765004	1.23049	1.18945	1.07457	1.07987	-0.109581	0.00653691	-0.114886	0.00529202		0.233784	0.00143093	-0.231706	0.022099		-0.000662804	0.994442	-0.272881	0.00654599
-0.564205	-0.487623	-0.411093	-0.476101	-0.329146	-0.434586	-0.67931	-0.85494	-0.683933	-0.825344	-0.852315	-0.937219	-0.97279	-1.00853	-0.854316	-1.32458	-1.39895	-1.21173	-0.380222	-0.319404	-0.372199	-0.553121	-0.716604	-0.648139	-0.562357	-0.598984	-0.550276	-0.48764	-0.413278	-0.739394	-0.871626	-0.945213	-1.31176	-0.357275	-0.639288	-0.570539	-0.213264	0.00174887	-0.282013	0.00636885		-0.440129	0.00160154	-0.073587	0.256787		-0.251754	0.0144711	0.0743628	0.303752
-1.91196	-1.81911	-2.42874	-1.48133	-1.91222	-1.32584	-1.38823	-1.33517	-1.38205	-2.61789	-2.32156	-2.59921	-1.45227	-1.2696	-1.3882	-1.46144	-1.5591	-1.41848	-2.60758	-2.16681	-3.24139	-1.33342	-1.43312	-1.45606	-1.80485	-3.24499	-1.89927	-2.05327	-1.57313	-1.36848	-2.51288	-1.37002	-1.47967	-2.67193	-1.40753	-2.31637	0.355558	0.616751	1.26439	0.0125308		1.03321	0.000687855	1.14286	0.00416901		0.684787	0.0129535	0.480142	0.134523
-0.503015	-0.543031	-0.196136	0.293017	0.30444	0.231126	-1.19799	-1.21276	-0.464709	-0.44073	-0.433549	-0.727132	-0.299033	-0.0777256	-0.22374	-0.445053	-0.817639	-0.580984	-1.66015	-0.310921	-0.641801	-0.202573	-2.61762	-0.226558	-0.475258	-0.549278	-0.951316	-0.414061	0.276194	-0.958484	-0.533804	-0.200166	-0.614559	-0.870956	-1.01558	-0.658617	0.212339	0.742886	-0.144627	0.926572		-0.0807552	0.705866	0.333637	0.0454596		-0.544424	0.0641992	0.690255	0.0111166
-1.97477	-1.71423	-2.165	-1.25643	-1.64685	-1.67346	-1.72042	-1.97122	-2.03112	-2.0876	-1.90081	-2.31859	-2.24374	-2.07449	-1.78536	-2.41479	-2.19112	-2.41583	-1.91853	-1.82456	-1.89627	-1.86689	-2.11521	-2.06855	-2.22024	-1.88456	-1.74118	-1.95133	-1.52558	-1.90758	-2.10233	-2.03453	-2.34058	-1.87979	-2.01689	-1.94866	-0.0688735	0.755124	-0.1371	0.12701		-0.238248	0.0826157	0.0678054	0.808671		0.0437489	0.883324	0.425754	0.0871807
-1.818	-1.48763	-1.40205	-1.05968	-1.06566	-1.1765	-0.66287	-0.604188	-0.491169	-0.622418	-0.544528	-0.510824	-0.465999	-0.346092	-0.551492	-0.321029	-0.221106	-0.193498	-1.26153	-1.29202	-1.38394	-1.11381	-1.10787	-1.32108	-1.11855	-0.910935	-0.537965	-1.56922	-1.10061	-0.586076	-0.559257	-0.454528	-0.245211	-1.3125	-1.18092	-0.855818	0.456682	0.0326844	0.131582	0.131832		0.314046	0.00240865	0.104729	0.183474		0.983149	0.00190249	0.468614	0.0321747
-1.3783	-1.44609	-1.80688	-1.39392	-1.45188	-1.19771	-0.858268	-0.931022	-1.02993	-1.38384	-1.61125	-1.56853	-1.17762	-1.22512	-1.3846	-0.732683	-0.673636	-0.889853	-1.49178	-1.67192	-1.45277	-1.28581	-0.981379	-1.16858	-0.871562	-0.860085	-0.869434	-1.54376	-1.34784	-0.939739	-1.52121	-1.26244	-0.765391	-1.53882	-1.14526	-0.867027	0.671796	0.000979298	0.393566	0.0177084		0.755816	0.00118617	0.258764	0.0492444		0.604019	0.00819794	0.195921	0.273745
0.44259	0.21664	0.571479	0.49384	0.845498	0.347515	0.444515	0.472815	0.381706	0.571	0.662756	0.623666	0.723747	0.642581	0.799078	0.347467	0.516362	0.663872	-0.0416572	0.16902	0.197878	0.234633	0.00421047	0.331381	0.384314	0.335244	0.371875	0.410236	0.562284	0.433012	0.619141	0.721802	0.509234	0.108414	0.190075	0.363811	0.255397	0.0181381	0.0816614	0.599772		-0.109907	0.197492	0.102661	0.111487		0.022776	0.910229	0.152048	0.488883
-2.77389	-2.69271	-1.92521	-1.93368	-2.66098	-2.83697	-2.3022	-1.98734	-2.97588	-2.048	-2.38129	-3.293	-2.21767	-2.77377	-3.84832	-2.18232	-2.42777	-2.71987	-2.47963	-3.36792	-2.40601	-3.29236	-2.27943	-2.51443	-2.26641	-2.33718	-3.27679	-2.46393	-2.47721	-2.42181	-2.5741	-2.94659	-2.44332	-2.75119	-2.69541	-2.6268	0.124392	0.878788	0.0557799	0.94282		0.130772	0.868253	-0.372493	0.644744		0.0421278	0.955634	-0.0132722	0.983683
1.07455	1.14435	0.876739	-1.57269	-1.95305	-1.35276	0.233871	-0.111526	0.0764287	0.913493	0.776181	0.65609	-0.511188	-2.29176	-1.5004	-0.636463	-0.470744	-0.527231	-0.680241	-0.319766	-0.871334	-2.22844	-1.29206	-0.995529	-0.801204	-0.823201	-1.21201	1.03188	-1.62617	0.0662579	0.781921	-1.43445	-0.544813	-0.62378	-1.50534	-0.945472	-0.321692	0.125797	-0.881564	0.0675866		-1.32673	0.000238612	-2.21637	0.0181522		-0.965623	0.00189099	-2.65805	0.00460377
0.82464	0.93347	0.865605	1.09364	1.21482	1.20405	0.593832	0.382942	0.60635	0.929651	0.996315	1.04822	1.29835	1.19656	1.1794	0.665065	0.712552	0.724201	1.05149	1.12846	1.04073	1.54311	1.53854	1.20513	0.421191	0.373375	0.403605	0.874571	1.17084	0.527708	0.991395	1.22477	0.700606	1.07356	1.42893	0.39939	-0.674167	0.000659574	0.355371	0.0261898		-0.290788	0.00140518	0.233375	0.0153156		-0.346863	0.00748623	0.296264	0.0116422
-0.969733	-0.768326	-0.678305	-0.243342	-0.0567317	-0.0739622	-1.38042	-1.30105	-1.32125	-1.24192	-1.12219	-1.25487	-0.0461318	-0.380039	0.0623052	-1.47843	-1.10094	-1.03664	-0.885658	-0.95136	-0.863161	0.606422	0.583287	0.329556	-1.47634	-1.33153	-1.32675	-0.805454	-0.124679	-1.33424	-1.20632	-0.121289	-1.20534	-0.90006	0.506422	-1.37821	-0.478148	0.00174624	1.40648	0		0.000985781	0.997438	1.08504	0.00476658		-0.528785	0.00284366	0.680776	0.00978785
0.790725	1.02884	0.943362	0.78515	0.625594	0.610536	0.240915	0.122542	0.132849	0.864272	0.778162	0.780931	0.67433	0.50595	0.766054	-0.223915	-0.224579	-0.180471	1.25066	1.29173	1.24819	1.36885	1.33634	1.61087	0.750202	0.706391	0.595909	0.920977	0.67376	0.165435	0.807789	0.648778	-0.209655	1.26353	1.43868	0.684167	-0.579359	0.000640205	0.175158	0.0848766		-1.01744	0.000603774	-0.159011	0.111552		-0.755541	0.000968062	-0.247217	0.0568981
-1.53894	-1.60668	-1.87363	-1.33698	-1.38761	-1.90697	-1.54195	-1.4254	-1.50815	-0.832529	-1.02531	-0.927422	-1.00126	-0.688994	-0.720953	-1.6503	-1.01054	-1.11975	-0.801291	-0.721568	-0.934793	-0.95358	-1.20794	-0.48464	-0.845254	-0.822699	-0.939231	-1.67308	-1.54385	-1.49183	-0.928421	-0.803735	-1.2602	-0.819217	-0.882054	-0.869061	-0.0498443	0.558935	-0.0628368	0.85971		-0.331777	0.0905001	0.124687	0.327991		0.18125	0.098843	0.12923	0.646433
-1.2358	-1.3291	-1.61458	-1.73609	-2.21186	-1.61103	-1.03028	-0.860375	-1.17363	-1.48664	-2.16687	-1.76071	-1.32401	-1.75857	-1.53626	-1.08692	-1.00325	-0.864828	-2.8586	-2.17027	-2.02183	-0.713689	-1.04805	-0.941006	-0.911946	-1.00218	-1.21875	-1.39316	-1.85299	-1.02143	-1.80474	-1.53961	-0.985001	-2.35023	-0.900916	-1.04429	1.30594	0.00728582	1.44932	0.00675038		0.819739	0.00824448	0.265126	0.311495		0.371729	0.0336943	-0.459833	0.099627
0.431415	0.0189755	0.0270979	-0.395256	-0.601142	-0.368865	0.343117	0.350834	-0.375042	-1.1258	-0.219346	0.0553892	-0.863052	-0.37588	-0.368921	-0.355946	-0.275154	-0.233501	-1.07171	-0.502838	-1.41447	-1.36336	-1.37614	-1.84133	-0.603939	-0.655264	-1.23795	0.159163	-0.455088	0.106303	-0.429917	-0.535951	-0.2882	-0.996338	-1.52694	-0.832383	0.163955	0.743901	-0.530604	0.121578		0.141717	0.829102	-0.106034	0.866832		-0.0528601	0.919446	-0.614251	0.0249324
0.484478	0.524649	0.499931	0.416929	0.273289	0.276904	0.256295	0.138613	0.17944	0.559105	0.554318	0.552135	0.336022	0.365891	0.55847	0.182003	0.206833	0.170872	0.499364	0.601089	0.749376	0.0461819	0.0504351	0.29559	0.587094	0.683629	0.488492	0.503019	0.322374	0.19145	0.555186	0.420128	0.186569	0.61661	0.130736	0.586405	-0.0302047	0.850052	-0.485874	0.0100873		-0.368617	0.000721805	-0.135058	0.113816		-0.31157	0.00134881	-0.180645	0.0282646
-0.484288	-0.590707	-0.484123	-1.43436	-1.32066	-1.31241	-1.51623	-1.33195	-1.4641	-0.956016	-0.892208	-0.62333	-1.45171	-2.22208	-1.38753	-1.56088	-1.52711	-1.28343	-1.0408	-1.12853	-0.813273	-1.73397	-1.3364	-1.54674	-1.0462	-1.36567	-1.09155	-0.519706	-1.35581	-1.43743	-0.823852	-1.68711	-1.45714	-0.994201	-1.53904	-1.16781	-0.173604	0.193123	-0.544836	0.015428		-0.633287	0.00496422	-0.863254	0.0408513		-0.917721	0.000343015	-0.836104	0.00438596
1.47222	1.83311	1.72404	1.34714	0.72801	0.298567	0.455716	0.103313	0.0492632	0.745231	0.725777	0.797868	0.312786	0.429054	0.306786	-0.159726	-0.292701	-0.0709162	0.340728	0.403455	0.326934	1.48629	1.03593	1.30897	1.08516	0.722015	0.959325	1.67646	0.791241	0.202764	0.756292	0.349542	-0.174448	0.357039	1.27707	0.922166	0.565127	0.00576421	0.920028	0.00351815		-0.930739	0.000329818	-0.40675	0.00457718		-1.47369	0.00114359	-0.885215	0.0577121
1.33254	1.38581	1.39981	1.40241	1.30618	1.41867	1.21601	1.23115	1.25187	1.38805	1.36716	1.45573	1.29845	1.26748	1.09161	1.22277	1.21547	1.17361	1.49387	1.48158	1.4496	0.876024	0.918856	0.802004	0.844329	0.722239	0.793754	1.37272	1.37575	1.23301	1.40365	1.21918	1.20395	1.47502	0.865628	0.786774	-0.688243	0.000794872	-0.609389	0		-0.199693	0.00210174	-0.184467	0.0543956		-0.139707	0.00279205	0.00303197	0.963527
-2.16444	-2.27521	-1.96205	-2.16022	-1.70203	-2.11534	-1.88395	-2.31862	-2.17502	-2.71623	-2.67189	-2.51341	-2.95073	-2.42822	-2.10038	-1.57935	-1.71336	-1.67489	-2.36539	-1.92103	-2.73594	-1.81456	-2.20377	-1.9579	-1.42424	-1.36757	-1.32542	-2.1339	-1.99253	-2.12586	-2.63384	-2.49311	-1.65587	-2.34079	-1.99207	-1.37241	0.968379	0.0108442	0.348713	0.215203		0.977977	0.000313582	0.140731	0.690342		0.00803312	0.978802	0.141365	0.502986
-1.69516	-1.90638	-1.7658	-1.92004	-1.82808	-1.79399	-2.14852	-2.13467	-1.59448	-2.17911	-2.15366	-2.22558	-1.72674	-1.79963	-1.92109	-1.68842	-1.51723	-1.596	-2.18255	-2.26038	-2.16589	-1.52248	-1.72485	-1.62376	-1.85383	-2.21201	-1.89556	-1.78911	-1.84737	-1.95922	-2.18611	-1.81582	-1.60055	-2.20294	-1.6237	-1.98714	0.215806	0.0801813	0.579244	0.0021063		0.585562	0.000592787	0.370291	0.00766179		-0.170113	0.376224	-0.0582604	0.515556
-2.39015	-1.67096	-1.66629	-2.33399	-1.77636	-2.53498	-2.1289	-1.71279	-1.75451	-1.90027	-2.11013	-1.99993	-2.26558	-2.27626	-1.90889	-2.45982	-2.12508	-1.69251	-2.02304	-1.95681	-2.0276	-2.55	-2.53417	-2.82375	-1.72711	-1.67668	-2.007	-1.90913	-2.21511	-1.8654	-2.00345	-2.15024	-2.09247	-2.00248	-2.63597	-1.80359	0.198891	0.0762947	-0.633489	0.00430726		-0.0890212	0.833786	-0.146798	0.332581		0.0437314	0.934008	-0.305979	0.436132
-1.688	-0.790631	-1.47106	-1.6481	-1.62326	-1.39307	-1.11647	-0.595231	-1.60356	-1.23608	-0.703789	-1.30145	-1.37213	-1.36677	-1.6059	-1.6087	-1.40255	-1.19124	-1.87779	-1.27167	-1.49385	-1.78634	-2.02543	-1.99676	-1.31258	-0.868604	-1.44005	-1.31656	-1.55481	-1.10509	-1.08044	-1.44827	-1.40083	-1.54777	-1.93618	-1.20708	0.34069	0.160527	-0.38841	0.0824044		-0.320394	0.122001	-0.367827	0.134189		0.211476	0.713891	-0.238246	0.487746
0.602603	0.378909	0.225748	-0.404826	-0.428826	-0.470004	-0.0309036	0.0903647	-0.101165	0.819831	0.708063	0.577238	0.0259564	-0.0657532	0.0689719	0.438152	0.494468	0.425011	0.0527203	0.107486	0.161088	0.890335	0.944642	1.32189	0.77244	0.711081	0.630685	0.40242	-0.434552	-0.0139012	0.701711	0.00972501	0.452544	0.107098	1.05229	0.704735	0.597637	0.000591716	0.945192	0.00382076		-0.249167	0.0118302	-0.691986	0.00459281		-0.416321	0.0152835	-0.836972	0.00657655
-0.828824	-0.686417	-0.624585	-0.222301	-0.419569	-0.295737	-0.218765	-0.231272	-0.210794	-0.457211	-0.456939	-0.588103	-0.264274	-0.112995	-0.268269	-0.162474	-0.0858598	0.0128098	-0.905432	-0.867683	-0.763049	-0.840862	-0.837381	-0.765468	-0.281208	-0.294016	-0.377319	-0.713275	-0.312536	-0.220277	-0.500751	-0.215179	-0.0785081	-0.845388	-0.81457	-0.317514	0.527874	0.00100648	0.0308178	0.628191		0.422243	0.00226161	0.285571	0.0181441		0.492998	0.00144559	0.40074	0.0168307
-0.906546	-1.15736	-1.02113	-0.999921	-0.901568	-1.01805	-1.32577	-0.94976	-0.745228	-1.11471	-0.99072	-0.922488	-0.717726	-0.872918	-0.499182	-0.746776	-0.797918	-0.611384	-1.29219	-1.11036	-1.03785	-1.30282	-1.26799	-1.11979	-0.699185	-0.966326	-0.369179	-1.02834	-0.973179	-1.00692	-1.0093	-0.696609	-0.718693	-1.1468	-1.2302	-0.67823	0.468572	0.0378975	-0.0833999	0.43853		0.290612	0.0098481	0.312696	0.0588143		0.0214256	0.951707	0.055166	0.600646
0.380237	0.296055	0.57878	0.651787	0.594785	0.677354	0.636667	0.727094	0.734705	0.490451	0.432022	0.337412	0.528292	0.567116	0.568049	0.524192	0.553007	0.60665	0.516207	0.581096	0.556081	0.504549	0.523975	0.655715	0.798073	0.912236	0.753333	0.418357	0.641309	0.699489	0.419961	0.554486	0.561283	0.551128	0.561413	0.821214	0.270086	0.00517217	0.0102852	0.905191		0.141322	0.0218809	0.134525	0.0444107		0.281131	0.0186364	0.222951	0.0684
0.907712	0.944935	0.90767	1.02162	0.990633	1.04343	0.92127	1.0126	0.909798	0.978469	0.886676	1.01783	1.1364	1.15856	1.2037	1.11714	1.10529	1.15929	0.919948	0.991167	1.0739	1.17119	1.10274	1.32781	0.952769	0.80905	0.935754	0.920106	1.01856	0.947889	0.960993	1.16622	1.12724	0.995005	1.20058	0.899191	-0.095814	0.130659	0.205575	0.0438843		0.166244	0.00824239	0.205223	0.0147946		0.0277837	0.449434	0.0984541	0.0155752
1.56798	1.54391	1.78587	1.92625	1.41522	1.41314	1.49875	1.45824	1.61902	1.73747	1.54634	1.65542	1.73539	1.67988	1.72806	1.53515	1.56917	1.62685	1.64486	1.79179	1.81669	1.89308	1.72444	1.93071	1.79292	1.96043	1.80879	1.63259	1.58487	1.52534	1.64641	1.71444	1.57706	1.75112	1.84941	1.85405	0.102932	0.164252	0.0982928	0.271418		-0.0693507	0.207375	0.0680335	0.295324		-0.107247	0.213666	-0.0477169	0.874919
3.09913	2.86709	2.79016	3.0132	2.96934	2.95811	2.7683	2.9231	2.8371	3.23732	3.13474	3.10486	2.84936	2.88587	2.98861	2.88717	2.90258	2.85967	3.38226	3.40205	3.43679	3.05719	3.08506	3.37382	3.16593	3.19406	3.13379	2.91879	2.98021	2.84284	3.15897	2.90795	2.88314	3.40703	3.17202	3.16459	-0.242441	0.00103128	-0.235009	0.0589884		-0.275834	0.00200441	-0.251026	0.0172991		-0.0759576	0.511594	0.061421	0.622442
3.27921	3.26412	3.30359	2.99406	2.90859	2.89104	2.95	2.99705	2.89305	3.39508	3.34929	3.35491	2.89332	2.87924	2.74409	2.95067	2.93567	2.93376	3.15328	3.02124	3.22137	2.96935	2.75515	2.79421	2.92629	3.18737	3.0029	3.28231	2.93123	2.9467	3.36642	2.83888	2.94004	3.13196	2.83957	3.03885	-0.0931075	0.338207	-0.292395	0.0217237		-0.426389	0.000403361	-0.527543	0.0040678		-0.335608	0.000633141	-0.351078	0.00534111
0.665335	0.86073	0.869122	1.53269	1.50994	1.5586	0.834504	0.862096	0.823055	-0.269221	-0.253778	-0.473616	1.39309	1.41319	1.44776	0.147365	0.237488	0.108748	0.119483	-0.0154192	0.199286	2.36071	1.93979	2.16564	0.19452	0.399847	0.393302	0.798396	1.53374	0.839885	-0.332205	1.41801	0.164534	0.101116	2.15538	0.329223	0.228107	0.038212	2.05427	0		0.496738	0.00237989	1.75022	0.00413333		0.0414893	0.642351	0.735346	0.00590968
1.2565	1.26467	1.35576	1.25495	1.23056	1.18569	0.970583	0.947696	0.930753	1.45941	1.40718	1.57291	1.42319	1.27765	1.22327	1.10572	1.18275	1.13072	1.60049	1.54962	1.54613	1.16264	1.26768	1.07594	1.01041	1.00357	1.0664	1.29231	1.22373	0.949677	1.47983	1.30804	1.13973	1.56541	1.16875	1.02679	-0.538619	0.000536797	-0.396659	0.00369509		-0.340105	0.00226081	-0.171796	0.083433		-0.342633	0.000798115	-0.0685788	0.140817
0.711906	0.454993	0.292675	0.574009	0.569959	0.472782	0.583811	0.682407	0.536147	0.291398	0.398953	0.381909	0.430841	0.502272	0.503936	0.54537	0.636811	0.599927	0.226284	0.285301	0.378575	0.145138	0.201687	0.293941	0.796394	0.991898	0.763043	0.486525	0.538916	0.600788	0.35742	0.479016	0.594036	0.29672	0.213589	0.850445	0.553725	0.00312048	-0.0831315	0.21296		0.236616	0.00295164	0.121596	0.0423188		0.114264	0.37623	0.0523916	0.782652
0.241606	0.209387	0.333102	0.346951	0.254192	0.258246	0.0736187	0.0429394	0.14606	0.137494	0.126632	0.147653	0.505032	0.35308	0.47972	0.155796	0.0748734	0.103852	0.0957501	0.118211	0.146951	0.534673	0.372856	0.27786	0.168711	0.421416	0.253836	0.261365	0.286463	0.0875393	0.13726	0.445944	0.111507	0.120304	0.39513	0.281321	0.161017	0.0566987	0.274826	0.0166779		-0.0257527	0.239744	0.308684	0.00724528		-0.173826	0.0127706	0.0250981	0.708968
-0.65111	-0.804734	-0.725356	-0.573823	-0.343601	-0.587317	-0.544898	-0.617821	-0.439533	-0.424572	-0.525865	-0.512574	-0.412034	-0.448406	-0.327419	-0.590551	-0.484126	-0.563908	-0.770245	-0.70231	-1.02728	-0.860121	-1.02159	-0.935529	-0.951766	-1.05622	-0.650115	-0.727067	-0.50158	-0.534084	-0.48767	-0.395953	-0.546195	-0.83328	-0.93908	-0.886034	-0.0527545	0.846975	-0.1058	0.384949		-0.0585248	0.15278	0.0917172	0.116563		0.192983	0.0249242	0.225486	0.0715286
0.334286	0.294771	0.267164	0.487965	0.520703	0.604652	0.375752	0.434262	0.180601	0.748929	0.718613	0.759457	0.673147	0.633162	0.680239	0.54642	0.64208	0.543587	0.931425	0.879758	0.867195	1.00112	0.996328	0.932454	0.846474	0.512985	0.731649	0.298741	0.537773	0.330205	0.742333	0.662183	0.577362	0.892793	0.976633	0.697036	-0.195757	0.0693687	0.0838402	0.0335669		-0.164971	0.00474957	-0.0801504	0.0185264		0.0314643	0.812553	0.239033	0.0111619
0.967352	0.960497	1.08394	0.727374	0.83662	0.960411	0.955914	1.06419	0.964829	0.978507	1.04425	0.952968	0.758761	0.787565	0.515823	0.793711	0.810334	0.8008	1.28569	1.26369	1.32413	1.1213	1.24435	1.02778	0.672901	0.702125	0.832473	1.00393	0.841468	0.994977	0.991908	0.687383	0.801615	1.29117	1.13114	0.735833	-0.555338	0.000967871	-0.160027	0.0492875		-0.190293	0.00155856	-0.304525	0.0314587		-0.00895373	0.929942	-0.162463	0.106116
-0.10506	-0.273182	0.0301287	0.602589	0.475884	0.519618	0.0573142	0.150797	0.133373	-0.0230672	0.0700321	-0.100291	0.555024	0.688856	0.802732	-0.278929	0.0471196	0.0210729	0.120956	-0.00852561	0.245586	0.552877	0.810138	0.87907	-0.255252	-0.00249839	-0.210286	-0.116038	0.532697	0.113828	-0.0177752	0.682204	-0.0702456	0.119339	0.747362	-0.156012	-0.275351	0.0346186	0.628023	0.00720621		-0.0524704	0.789575	0.699979	0.00455863		0.229866	0.0358375	0.648735	0.00894038
-2.58926	-2.04361	-1.91976	-1.59365	-2.15062	-2.2355	-1.7101	-1.36072	-1.73211	-2.26069	-2.285	-2.65506	-2.13526	-2.26424	-2.19343	-1.70314	-1.63095	-1.26081	-2.22743	-2.2781	-2.05767	-2.21712	-2.89308	-2.47065	-1.84602	-1.44437	-1.63863	-2.18421	-1.99325	-1.60098	-2.40025	-2.19765	-1.53163	-2.18773	-2.52695	-1.64301	0.544725	0.0108664	-0.339217	0.137819		0.86862	0.0052486	0.202607	0.186772		0.583234	0.037893	0.190957	0.613133
-0.152921	-0.135236	-1.11664	-0.809041	0.565139	0.158568	0.228221	-1.01575	0.142629	-1.89168	-1.5443	-2.11822	-0.274561	-1.3655	-0.49539	-0.46208	-1.7631	-1.16473	-1.15832	-0.693838	-1.80393	-0.174928	-0.497174	-0.725315	-0.254204	-2.04224	-0.402763	-0.468264	-0.0284448	-0.214967	-1.8514	-0.711818	-1.12997	-1.2187	-0.465806	-0.899735	0.31896	0.74748	0.752889	0.0750007		0.721429	0.0742831	1.13958	0.0393077		0.253297	0.748362	0.439819	0.487625
0.20398	0.0285041	0.1874	-0.615784	-0.659627	-0.703022	-0.924584	-0.801311	-0.838266	-0.121158	-0.00879622	-0.486451	-1.05385	-1.40576	-1.33494	-1.42225	-1.95742	-1.29109	0.223499	-0.0593703	0.0404894	-1.09812	-0.767513	-0.957003	-0.621426	-0.500368	-0.78643	0.139961	-0.659478	-0.85472	-0.205468	-1.26485	-1.55692	0.0682059	-0.94088	-0.636075	-0.704281	0.00395508	-1.00909	0.00239598		-1.35145	0.00343129	-1.05938	0.00858566		-0.994682	0.000385692	-0.799439	0.00626374
-0.381114	-0.420368	-0.331619	-0.225806	-0.329047	-0.35006	-0.221592	-0.200984	-0.145972	-0.495566	-0.452491	-0.532033	-0.465806	-0.49352	-0.480016	-0.343161	-0.353923	-0.29375	-0.169377	-0.257518	-0.259793	-0.463181	-0.494139	-0.46941	-0.2461	-0.393886	-0.280563	-0.3777	-0.301637	-0.189516	-0.493363	-0.479781	-0.330278	-0.228896	-0.475576	-0.30685	-0.0779539	0.142326	-0.246681	0.00234646		0.163085	0.00300995	0.0135823	0.685798		0.188184	0.00373442	0.0760629	0.172975
-0.819648	-0.80495	-0.957247	-1.22826	-1.11772	-0.71145	-0.403152	-0.670052	-0.551405	-1.15901	-1.30788	-1.2302	-1.32903	-1.07093	-1.80315	-0.565176	-0.613175	-0.513477	-1.47403	-1.37235	-1.25456	-1.71902	-1.72487	-1.57154	-0.899533	-1.46451	-1.14759	-0.860615	-1.01914	-0.541536	-1.23236	-1.40104	-0.563943	-1.36698	-1.67181	-1.17054	0.196436	0.250994	-0.304831	0.0145608		0.668421	0.000299391	-0.168675	0.526644		0.319079	0.0137438	-0.158528	0.414536
0.899044	0.910658	0.952238	0.82416	0.647579	0.597976	-0.598624	-0.57294	-0.561417	0.83887	0.881624	0.747812	0.70018	0.633433	0.77291	-0.733694	-0.643203	-0.750798	0.607136	0.669785	0.649613	1.2982	1.05643	0.996137	-0.448139	-0.263124	-0.458679	0.920647	0.689905	-0.57766	0.822769	0.702174	-0.709232	0.642178	1.11692	-0.389981	-1.03216	0.000567506	0.474741	0.00741221		-1.532	0.00048	-0.120594	0.0910618		-1.49831	0	-0.230742	0.0386149
-3.39555	-2.73845	-2.08035	-1.81641	-2.15924	-2.09503	-2.23922	-2.02194	-1.82342	-1.57739	-1.86626	-2.61099	-2.51057	-2.36426	-1.91501	-2.05785	-2.06199	-1.84117	-4.22087	-2.09987	-2.52639	-2.41394	-2.65033	-2.41468	-2.36301	-2.65122	-2.3195	-2.73812	-2.02356	-2.02819	-2.01821	-2.26328	-1.98701	-2.94905	-2.49299	-2.44458	0.504471	0.48804	0.456061	0.57315		0.0312071	0.964378	-0.245066	0.588987		0.709925	0.0858133	0.714554	0.141391
-0.749289	-0.817735	-0.937268	-0.540768	-0.470405	-0.589838	-0.380881	-0.132905	0.0279014	-1.50163	-1.31241	-1.48001	-0.356514	-0.208278	-0.423255	0.0212393	-0.0600829	-0.0474896	-1.03754	-0.854483	-1.30454	-0.103125	-0.123787	-0.21003	-0.960347	-1.05708	-1.01693	-0.834764	-0.53367	-0.161961	-1.43135	-0.329349	-0.0287778	-1.06552	-0.145647	-1.01145	0.0540671	0.804271	0.919874	0.00361631		1.40257	0.000225882	1.102	0.00436641		0.672803	0.00452278	0.301094	0.0176425
1.63881	1.71476	1.72651	1.8206	1.96647	1.90212	1.86849	1.78557	1.85661	1.7092	1.74908	1.74806	1.86365	1.79785	1.81746	1.967	1.98813	1.96528	1.79106	1.77191	1.71616	1.62668	1.65364	1.48285	1.84503	1.73633	1.87918	1.69336	1.8964	1.83689	1.73545	1.82632	1.97347	1.75971	1.58772	1.82018	0.0604691	0.200649	-0.171988	0.0287238		0.238026	0.000272277	0.0908705	0.0221561		0.143529	0.011264	0.203034	0.0244665
-0.223198	-0.167672	-0.149129	-0.453917	-0.0315514	-0.000310898	-0.133978	-0.30524	0.0372536	-0.590985	-0.225241	-0.408933	-0.248481	-0.397675	-0.362727	-0.528903	-0.217988	-0.160029	-0.306373	-0.388096	-0.391152	0.0534308	-0.0112023	-0.220222	-0.367554	-1.24598	-0.776575	-0.18	-0.161926	-0.133988	-0.408386	-0.336294	-0.302307	-0.361873	-0.059331	-0.796702	-0.434829	0.0988236	0.302542	0.0188137		0.106079	0.563664	0.0720918	0.633176		0.0460116	0.773373	0.0180733	0.942373
-0.22812	-0.0600898	-0.424024	-0.0374565	-0.198985	-0.117489	0.0937064	0.348073	0.151772	-0.150262	-0.117777	-0.1954	0.0466955	-0.0634515	-0.0870664	0.403996	0.16509	0.230074	-0.390023	-0.525792	-0.423406	-0.284032	-0.260858	0.0353799	0.0609601	0.106422	0.0938473	-0.237411	-0.117977	0.19785	-0.15448	-0.0346075	0.266386	-0.446407	-0.169837	0.0870763	0.533484	0.000672948	0.27657	0.0469309		0.420866	0.00284375	0.119872	0.0595713		0.435262	0.015912	0.119435	0.375213
-2.40162	-2.16756	-2.24177	-1.8696	-2.254	-2.20506	-2.03726	-1.94813	-1.67719	-1.54632	-2.13492	-1.73096	-1.91513	-1.81276	-1.83924	-1.61222	-1.74621	-1.6015	-2.11928	-1.86609	-1.81833	-2.9819	-2.63538	-2.31193	-1.84494	-1.71569	-1.5912	-2.27031	-2.10955	-1.88753	-1.80407	-1.85571	-1.65331	-1.93457	-2.64307	-1.71727	0.217296	0.0819835	-0.7085	0.022003		0.150759	0.386974	-0.051638	0.853712		0.382785	0.0217087	0.16076	0.320228
-1.07007	-1.03231	-1.06733	-0.770672	-1.06515	-0.699606	-1.00741	-1.24497	-0.848292	-1.2968	-1.44353	-1.55479	-0.950686	-0.884246	-0.919936	-0.971614	-1.16157	-1.25618	-1.06852	-1.01805	-1.11927	-0.727165	-0.840892	-0.495191	-0.88526	-0.988031	-1.11439	-1.05657	-0.845144	-1.03356	-1.43171	-0.918289	-1.12979	-1.06862	-0.687749	-0.995892	0.0727235	0.308796	0.380866	0.016653		0.301918	0.0241316	0.513417	0.00708233		0.0230161	0.916581	0.211428	0.131591
-1.25287	-1.28019	-1.25446	-1.21772	-1.15736	-1.16235	-0.89875	-0.909185	-0.865836	-1.44163	-1.38064	-1.34396	-1.252	-1.14804	-1.1981	-0.748456	-0.816188	-0.707293	-1.66195	-1.69903	-1.68647	-1.13569	-1.02604	-1.22341	-1.13855	-1.28249	-1.17294	-1.26251	-1.17914	-0.891257	-1.38875	-1.19938	-0.757312	-1.68249	-1.12838	-1.19799	0.484492	0.000771134	0.554107	0.00173864		0.631434	0.000236052	0.189363	0.0157132		0.37125	0	0.0833644	0.0254759
1.96888	1.95707	2.03326	1.95546	1.99071	1.96746	2.03671	2.05019	2.14631	1.42215	1.49434	1.4835	1.50352	1.63351	1.3033	1.55428	1.51184	1.51909	2.09284	1.91938	2.08838	1.91543	1.96837	1.9305	1.99847	1.80379	1.89155	1.9864	1.97121	2.07774	1.46667	1.48011	1.5284	2.03354	1.9381	1.89794	-0.1356	0.100366	-0.0954359	0.141123		0.0617385	0.0333527	0.013442	0.937176		0.0913356	0.0515935	-0.0151915	0.666939
0.7235	0.777065	0.609568	0.616246	0.132279	0.175398	0.387871	-0.0385425	0.247385	0.708963	0.680602	0.667489	0.356287	0.396906	0.478555	0.337326	0.422358	0.357816	0.653832	0.796485	0.827773	0.0866573	-0.119597	0.44941	0.315138	0.522563	0.554731	0.703378	0.307974	0.198904	0.685684	0.410583	0.3725	0.759363	0.138823	0.464144	-0.295219	0.0195534	-0.62054	0.0172529		-0.313185	0.000604682	-0.275102	0.00518677		-0.504473	0.0117433	-0.395403	0.0747554
1.26224	1.31367	1.27144	1.3131	1.38266	1.39334	1.20463	1.23707	1.20094	1.27703	1.29258	1.35911	1.4471	1.37298	1.3572	1.33492	1.3286	1.2728	1.31906	1.33898	1.31001	1.24815	1.19219	1.09197	1.05027	0.953989	1.11622	1.28245	1.36303	1.21421	1.30958	1.39242	1.31211	1.32268	1.17744	1.04016	-0.28252	0.00416021	-0.145244	0.0251593		0.00253057	0.971926	0.0828475	0.0844024		-0.0682341	0.0138189	0.0805854	0.0596726
-1.16247	-1.21336	-1.09743	-0.84798	-1.00893	-0.850268	-0.983359	-0.793697	-1.00452	-1.21881	-1.42263	-1.32401	-1.35557	-0.952253	-1.12978	-1.00997	-1.08993	-1.2097	-1.48073	-1.446	-1.55109	-1.16516	-1.29519	-1.30068	-1.34717	-1.29088	-1.33334	-1.15775	-0.902392	-0.927192	-1.32182	-1.14587	-1.1032	-1.49261	-1.25367	-1.3238	0.16881	0.00725486	0.238932	0.0100914		0.218619	0.0251514	0.175947	0.235887		0.230561	0.0198142	0.255361	0.0243006
-1.2071	-1.45983	-1.61175	-1.39686	-1.18514	-1.37434	-1.02602	-1.1204	-1.12133	-1.02709	-1.31183	-1.23021	-0.967013	-1.05254	-1.28523	-0.480656	-0.658252	-0.620734	-1.87501	-1.86428	-1.76307	-1.5025	-1.51196	-1.43353	-0.83421	-0.920298	-0.959272	-1.42623	-1.31878	-1.08925	-1.18971	-1.1016	-0.586547	-1.83412	-1.48266	-0.904593	0.929524	0.000782334	0.351455	0.00235908		0.603162	0.0024788	0.088114	0.586402		0.336979	0.027273	0.107449	0.523212
-0.746571	-0.965238	-0.912947	0.0922036	0.0589261	0.00879717	-0.31729	-0.129518	-0.420398	-0.611388	-0.710689	-0.64917	-0.237153	0.183789	0.0746114	-0.990219	-0.970423	-1.73263	-0.693532	-0.869261	-0.733266	-1.17551	-0.58797	-0.841606	-1.24097	-1.08195	-0.957134	-0.874919	0.053309	-0.289069	-0.657082	0.00708254	-1.23109	-0.765353	-0.868363	-1.09335	-0.327996	0.017584	-0.10301	0.667345		-0.574009	0.0377093	0.664165	0.0129487		0.58585	0.00382513	0.928228	0.00647727
0.136322	0.0661027	0.205635	-0.0804019	-0.0440564	-0.21569	-0.142778	-0.0909474	-0.196563	0.383435	0.341485	0.428919	0.104984	-0.0826929	-0.0406339	-0.161446	-0.198366	-0.238854	0.651595	0.538936	0.531403	-0.303066	-0.226724	-0.153107	-0.0516374	0.200498	0.228905	0.13602	-0.113383	-0.14343	0.384613	-0.00611424	-0.199555	0.573978	-0.227632	0.125922	-0.448056	0.00779578	-0.80161	0.000317241		-0.584168	0.000324963	-0.390727	0.0075672		-0.279449	0.00362281	-0.249403	0.0274734
-2.04613	-2.28512	-2.17523	-2.34299	-1.98294	-1.83164	-1.95153	-2.21546	-2.03335	-2.3327	-2.10622	-2.4904	-1.86029	-1.86186	-1.6547	-1.68597	-1.68222	-1.85238	-2.12553	-1.88612	-2.20739	-1.95852	-1.60346	-1.27624	-1.34824	-1.55113	-1.64759	-2.16882	-2.05252	-2.06678	-2.30977	-1.79229	-1.74019	-2.07301	-1.61274	-1.51565	0.557362	0.00952926	0.460271	0.0747765		0.569582	0.00542271	0.517484	0.0211199		0.102046	0.310268	0.116302	0.58896
1.04591	1.05015	1.13242	0.950502	1.13992	1.06443	1.37814	1.31927	1.34301	1.22168	1.26865	1.3148	1.23521	1.20812	1.08629	1.58369	1.61113	1.6116	1.05398	1.06214	1.08768	0.701917	0.591029	0.595307	1.04467	0.995903	1.06683	1.07616	1.05162	1.34681	1.26838	1.17654	1.60214	1.06794	0.629418	1.0358	-0.0321368	0.159314	-0.438519	0.00121185		0.333761	0.000345029	-0.0918402	0.144075		0.270645	0.00140591	-0.0245416	0.79333
0.725279	0.686191	0.865862	1.14483	1.08527	1.11204	0.695112	0.827832	0.834615	0.841988	0.787721	0.758237	1.11725	1.20255	1.24522	0.749631	0.747796	0.788398	1.10047	1.05836	1.05472	1.54674	1.42293	1.63056	1.11096	1.08172	1.0352	0.759111	1.11405	0.785853	0.795982	1.18834	0.761942	1.07118	1.53341	1.07596	0.00477513	0.925565	0.462228	0.00285664		-0.0340403	0.175499	0.392359	0.00472727		0.0267423	0.826117	0.35494	0.0110923
-1.62574	-1.61442	-1.61241	-1.28863	-0.996361	-1.24041	-1.29779	-1.51533	-1.36559	-1.81403	-2.05891	-1.62636	-1.10934	-1.50924	-1.43839	-1.57675	-1.67676	-1.55991	-1.38417	-1.11802	-1.39188	-1.06934	-0.679996	-1.0286	-1.37372	-1.52334	-1.25668	-1.61752	-1.17513	-1.3929	-1.8331	-1.35232	-1.60447	-1.29802	-0.925977	-1.38458	-0.0865559	0.524244	0.372044	0.0504825		0.228624	0.0742921	0.480776	0.0501255		0.224621	0.0138406	0.442391	0.0165271
-1.07869	-1.03302	-1.00858	-1.24546	-1.06132	-1.08932	-1.69508	-1.78715	-1.85613	-0.862916	-0.799689	-0.720957	-1.08642	-0.755994	-0.647898	-1.36191	-1.57312	-1.37282	-1.08599	-1.0001	-0.852479	-0.678539	-0.884995	-0.527943	-1.3057	-1.45535	-1.58187	-1.0401	-1.13204	-1.77946	-0.794521	-0.830104	-1.43595	-0.979522	-0.697159	-1.44764	-0.468119	0.00869559	0.282363	0.0600629		-0.641429	0.00119464	-0.0355839	0.874696		-0.739357	0.000367407	-0.0919373	0.203505
0.717458	0.758593	0.720371	1.0576	1.03364	1.01576	0.907512	0.929119	0.892338	0.780049	0.82686	0.715806	0.981266	0.927899	0.994691	0.897642	0.897494	0.824867	0.994833	1.03859	1.01681	1.35879	1.3204	1.54088	1.29284	1.0739	1.15549	0.732141	1.03567	0.909656	0.774238	0.967952	0.873335	1.01674	1.40669	1.17408	0.157333	0.0406127	0.389945	0.00608143		0.0990965	0.0304047	0.193714	0.0130322		0.177515	0.000634187	0.303526	0.002
-1.50824	-1.55602	-1.7454	-1.28833	-1.40254	-1.43479	-1.6032	-1.73459	-1.85143	-1.4797	-1.39742	-1.44366	-1.28119	-1.11621	-1.03309	-1.41277	-1.46491	-1.45588	-1.67349	-1.62116	-1.68741	-0.913259	-1.02339	-0.853592	-1.163	-1.13234	-1.02489	-1.60322	-1.37522	-1.72974	-1.44026	-1.1435	-1.44452	-1.66069	-0.930081	-1.10674	0.553941	0.000625782	0.730604	0.000302632		-0.00426054	0.944094	0.296758	0.0221005		-0.126518	0.192053	0.228004	0.0607116
0.121812	-0.0461147	-0.175522	-0.445849	-0.59761	-0.667061	-0.29597	0.0215614	-0.107557	-0.168482	-0.501663	-0.600399	-0.486548	-0.589101	-0.690758	0.0329418	0.000369072	-0.0938263	-1.26958	-1.70617	-1.16306	-1.29645	-0.86813	-1.22999	-0.476781	-0.899434	-0.853524	-0.0332749	-0.570173	-0.127322	-0.423515	-0.588802	-0.0201718	-1.3796	-1.13152	-0.743246	0.636358	0.0233733	0.248081	0.279547		0.403343	0.0180971	-0.165288	0.302444		-0.0940471	0.502556	-0.536898	0.0157906
0.103385	0.279441	0.185208	0.606536	-0.138873	0.137375	-0.144717	-0.300857	-0.463986	-0.178151	-0.0129333	-0.285587	-0.419425	-0.406752	-0.65815	-0.710607	-0.714561	-0.667003	-0.448338	-0.294345	-0.563053	-0.55374	-0.341772	-0.419245	-0.490068	-2.81769	-1.10363	0.189344	0.201679	-0.303187	-0.15889	-0.494776	-0.69739	-0.435245	-0.438252	-1.47046	-1.03521	0.137411	-0.00300662	0.987424		-0.5385	0.00190967	-0.335885	0.0424814		-0.492531	0.00617295	0.0123351	0.973096
0.310892	0.310179	0.359366	0.509223	0.370499	0.403769	0.467644	0.489008	0.481628	0.254312	0.297204	0.23811	0.458227	0.350327	0.482454	0.426466	0.3895	0.35377	0.509699	0.715238	0.657899	0.303716	0.351159	0.446921	0.572865	0.562898	0.490683	0.326812	0.42783	0.479427	0.263209	0.430336	0.389912	0.627612	0.367265	0.542148	-0.0854634	0.186714	-0.260347	0.0181135		0.126703	0.00526551	0.167127	0.0233407		0.152615	0.00118994	0.101018	0.0885602
1.375	1.43465	1.45639	1.60275	1.45762	1.44086	1.3531	1.41633	1.38833	1.67596	1.59193	1.63251	1.60432	1.5773	1.74755	1.42291	1.4495	1.44156	1.62202	1.63196	1.6556	1.5846	1.47505	1.58401	1.48563	1.78297	1.64317	1.42202	1.50041	1.38592	1.63346	1.64306	1.43799	1.63652	1.54789	1.63726	0.000730594	0.996822	-0.0886362	0.0548957		-0.195472	0.00124744	0.00959166	0.923504		-0.0360928	0.211685	0.0783932	0.239735
0.587348	0.679974	0.742208	0.551299	0.574727	0.731862	0.311747	0.156173	0.422714	0.404903	0.515675	0.455028	0.556756	0.43497	0.567137	0.398969	0.0797491	0.501886	0.25713	0.526196	0.312725	0.690787	0.959331	0.753892	0.352804	0.121363	0.166487	0.669843	0.619296	0.296878	0.458535	0.519621	0.326868	0.36535	0.801337	0.213552	-0.151798	0.154553	0.435987	0.0143792		-0.131667	0.26421	0.0610856	0.304026		-0.372965	0.00872239	-0.0505474	0.58887
-0.0381873	-0.205606	-0.371077	0.347411	0.346194	0.40674	0.232547	0.176412	0.126112	-0.723433	-1.02181	-0.933926	0.57871	0.422993	0.425396	0.0760717	0.0654135	0.045146	-1.23072	-1.26552	-1.39582	-0.18201	-0.203993	-0.260278	-0.509105	-0.396533	-0.366973	-0.204957	0.366782	0.178357	-0.893055	0.4757	0.0622104	-1.29735	-0.215427	-0.424204	0.873149	0.000765697	1.08193	0		0.955265	0.000648718	1.36875	0.00419556		0.383314	0.0112815	0.571739	0.0119244
-0.612416	-0.63691	-0.485473	-0.528909	-0.485669	-0.533413	-0.271411	-0.300824	-0.279835	-0.293788	-0.430266	-0.324486	-0.309171	-0.317207	-0.387843	-0.193418	-0.327556	-0.162436	-0.658437	-0.610704	-0.51976	-0.572892	-0.491745	-0.665109	-0.535759	-0.592717	-0.526757	-0.578266	-0.515997	-0.284023	-0.349513	-0.338074	-0.227804	-0.5963	-0.576582	-0.551744	0.0445559	0.326152	0.0197183	0.848208		0.12171	0.0638337	0.0114396	0.885466		0.294243	0.00274233	0.0622691	0.278129
2.61681	2.55364	2.54583	2.52737	2.52646	2.51459	2.21821	2.2781	2.24704	2.72174	2.78207	2.85839	2.63062	2.63124	2.46835	2.23309	2.27253	2.29158	2.86893	2.99661	3.00362	2.49519	2.55779	2.46861	2.25011	2.36297	2.36319	2.57209	2.52281	2.24779	2.7874	2.57674	2.26573	2.95639	2.50719	2.32542	-0.630967	0.000783246	-0.449195	0.00207805		-0.521664	0.000267081	-0.210662	0.0370488		-0.324309	0.000427073	-0.0492879	0.097354
-1.27512	-1.41528	-1.12134	-1.30625	-1.15562	-1.22099	-0.753965	-0.653718	-0.743137	-0.96282	-1.11604	-1.13805	-1.265	-1.37544	-1.29837	-0.280615	-0.137557	-0.227013	-1.17713	-1.04066	-1.13057	-1.21458	-1.37196	-1.24694	-0.238505	-0.570116	-0.40038	-1.27058	-1.22762	-0.71694	-1.0723	-1.31294	-0.215062	-1.11612	-1.27782	-0.403001	0.713118	0.00275701	-0.161706	0.0431179		0.857242	0.000281276	-0.240634	0.0235788		0.553641	0.00280366	0.0429591	0.759522
0.297503	0.348648	0.293454	0.47771	0.322026	0.351753	0.471488	0.392824	0.241968	0.713563	0.532196	0.595093	0.565827	0.387989	0.723449	0.405505	0.30361	0.312947	0.234843	0.226219	0.270713	0.0545137	-0.0693197	-0.0291295	0.526182	0.666437	0.642395	0.313202	0.38383	0.36876	0.613617	0.559088	0.340687	0.243925	-0.0146452	0.611672	0.367747	0.00181746	-0.25857	0.00417015		-0.27293	0.00598057	-0.054529	0.732372		0.0555582	0.449775	0.0706278	0.237643
-0.0352376	-0.0489709	-0.378358	-0.525141	-0.414093	-0.654552	-0.711643	-0.851141	-0.798527	-1.47092	-1.71007	-1.46754	-1.38705	-1.38381	-1.06343	-1.0646	-0.94493	-0.937421	-1.0267	-0.967326	-1.04525	-0.0905712	-0.169708	-0.10944	-0.933395	-1.06411	-0.742912	-0.154189	-0.531262	-0.787104	-1.54951	-1.27809	-0.982318	-1.01309	-0.12324	-0.913473	0.0996179	0.291096	0.889851	0		0.567195	0.00228915	0.271418	0.104031		-0.632915	0.00421189	-0.377073	0.05225
-0.12568	-0.116072	-0.135627	-0.0213861	0.0286927	0.00558233	0.404432	0.354011	0.363845	-0.375534	-0.422942	-0.282362	-0.17027	-0.208467	-0.332115	0.150687	0.347881	0.220571	-0.153373	-0.197938	-0.316131	-0.413261	-0.357566	-0.478853	0.0906775	0.0329387	0.23577	-0.125793	0.0042963	0.374096	-0.360279	-0.236951	0.239713	-0.222481	-0.41656	0.119795	0.342276	0.00891316	-0.194079	0.0229637		0.599992	0.000948864	0.123329	0.115023		0.499889	0	0.130089	0.00604181
-1.19881	-1.10433	-1.15638	-1.11932	-0.977649	-1.23845	-0.775255	-0.783434	-0.826459	-1.35032	-1.30886	-1.44845	-1.3013	-1.35028	-1.37017	-0.883795	-0.991258	-0.872779	-1.2637	-1.03431	-1.12394	-1.23238	-1.14472	-1.26687	-0.893883	-0.854189	-0.916788	-1.15317	-1.11181	-0.795049	-1.36921	-1.34058	-0.915944	-1.14065	-1.21465	-0.888286	0.252363	0.0139994	-0.0740051	0.381312		0.453268	0.00110861	0.0286284	0.639967		0.358121	0.000420263	0.0413632	0.714668
-0.147607	-0.283269	-0.294955	0.020824	-0.141005	0.204958	0.414433	0.0217621	-0.533295	-0.448715	-0.814856	-0.152523	0.48326	0.635448	0.365876	0.471688	0.610229	0.499905	0.298938	0.267196	0.373641	0.28651	-0.0650148	0.652376	0.844408	0.59838	0.483244	-0.241944	0.0282591	-0.0323668	-0.472031	0.494861	0.527274	0.313258	0.29129	0.642011	0.328753	0.0235906	-0.0219679	0.954166		0.999305	0.00417106	0.966893	0.0151507		0.209577	0.497118	0.270203	0.0743262
1.51097	1.31489	1.36897	0.880789	0.684664	0.698309	0.648011	0.711536	0.6897	1.04189	1.17596	1.12759	0.982583	0.789436	0.545722	1.00223	1.01763	0.771618	1.05192	0.757475	0.948879	1.43394	1.31425	1.49795	0.636899	0.323778	0.574661	1.39828	0.754587	0.683083	1.11514	0.77258	0.930492	0.919426	1.41538	0.51178	-0.407647	0.020074	0.495952	0.00765536		-0.184652	0.0473135	-0.342564	0.0569136		-0.715197	0.00033366	-0.643692	0.00690463
1.03685	1.06576	1.02484	1.22386	1.25421	1.25181	1.41643	1.37178	1.46191	1.06641	1.19532	1.12451	1.34598	1.39737	1.2752	1.56728	1.51562	1.56626	1.23494	1.23306	1.14532	1.18754	1.39638	1.1288	1.10311	0.970659	1.16743	1.04249	1.2433	1.41671	1.12875	1.33952	1.54972	1.20444	1.23757	1.0804	-0.124042	0.0744084	0.0331302	0.803953		0.420974	0.000727928	0.21077	0.019481		0.374221	0.000411125	0.200809	0.00740426
-0.308047	-0.613889	-0.424743	-1.16352	-0.723352	-0.15772	-0.827842	-0.468301	-0.548611	0.0636947	0.173174	-0.0356171	-0.748152	-0.658458	-0.625146	-0.705542	-0.819021	-0.650674	-0.347903	-0.690337	-0.409812	-0.408182	-1.54732	-0.941	-2.94559	-1.66466	-1.49048	-0.448893	-0.68153	-0.614918	0.0670838	-0.677252	-0.725079	-0.482684	-0.965502	-2.03358	-1.55089	0.0183954	-0.482818	0.19425		-0.792163	0.000716312	-0.744336	0.00425899		-0.166025	0.213975	-0.232637	0.541338
-0.280839	-0.275635	-0.344815	-0.0176086	-0.148687	-0.0144787	-0.144362	-0.116571	-0.187681	-0.217283	-0.238523	-0.104146	0.12148	0.346358	0.293974	-0.0872731	-0.183208	-0.262736	-0.414012	-0.309217	-0.197952	0.531953	0.499498	0.666032	0.529167	0.301531	-0.135896	-0.30043	-0.0602582	-0.149538	-0.186651	0.253937	-0.177739	-0.30706	0.565828	0.231601	0.538661	0.0326505	0.872888	0.00148235		0.00891177	0.948898	0.440588	0.0106658		0.150892	0.00510612	0.240172	0.0165966
0.909647	1.05388	0.957328	0.912255	0.963338	0.859984	1.02687	0.994369	1.02314	0.879753	0.950106	0.896424	0.976812	0.792811	0.903556	1.08967	1.09974	1.04082	1.09065	1.05365	0.998009	0.890096	0.928432	0.816499	1.28488	1.06506	1.24293	0.973619	0.911859	1.01479	0.908761	0.89106	1.07675	1.04744	0.878343	1.19762	0.150187	0.0605353	-0.169095	0.0130905		0.167984	0.00247964	-0.0177015	0.846327		0.0411746	0.332896	-0.0617603	0.305644
0.355518	0.427257	0.439591	0.482907	0.428773	0.40822	1.02617	1.0959	1.2266	-0.00710177	-0.108959	-0.143053	-0.140086	0.0820158	-0.0120499	0.703629	0.702124	0.681228	0.617092	0.584443	0.565511	0.540337	0.357596	0.675111	1.31986	1.30497	1.22976	0.407455	0.439967	1.11622	-0.0863711	-0.0233735	0.69566	0.589015	0.524348	1.28487	0.695851	0.00067027	-0.0646672	0.577068		0.782031	0.000382609	0.0629976	0.486375		0.708767	0.000400716	0.0325113	0.42515
3.46923	3.43038	3.39251	3.33748	3.23602	3.18708	3.15575	3.21698	3.21272	3.54571	3.27211	3.66555	3.55775	3.36869	3.36178	3.36515	3.5421	3.43448	3.49811	3.57809	3.45375	3.06639	2.73009	2.95697	2.99901	3.24116	3.30962	3.43071	3.25352	3.19515	3.49446	3.42941	3.44724	3.50999	2.91782	3.18326	-0.326721	0.019185	-0.592168	0.00616953		-0.0472159	0.842262	-0.0650502	0.735767		-0.235557	0.00146205	-0.177183	0.0311353
-1.50223	-1.72649	-2.77679	-1.37565	-2.41991	-1.79163	-1.02529	-1.60932	-1.73043	-1.18169	-0.858661	-0.892624	-0.705327	-0.754092	-0.538676	-0.213197	-0.405688	-0.213991	-0.453176	-0.326728	-0.174465	-0.0730603	0.334542	0.0566301	-0.307691	-0.318627	-0.264863	-2.00184	-1.8624	-1.45501	-0.977659	-0.666032	-0.277625	-0.318123	0.106037	-0.29706	0.0210631	0.889527	0.42416	0.0308635		0.700034	0.0026113	0.311627	0.058466		0.54682	0.199976	0.139438	0.861671
0.991297	1.09208	0.99964	1.19528	1.44983	1.63354	1.08863	1.16125	1.14033	0.430432	0.377851	0.34035	0.626266	0.760566	0.787456	0.540149	0.688559	0.515347	1.04588	0.842086	0.833367	0.972411	0.919314	1.03773	0.578194	0.696241	0.658252	1.02767	1.42622	1.13007	0.382878	0.724763	0.581352	0.907112	0.976484	0.644229	-0.262883	0.0171232	0.069372	0.430682		0.198474	0.0129619	0.341885	0.0079392		0.102402	0.0307612	0.398545	0.0448961
-1.81458	-2.52576	-1.09954	-1.82272	-1.34029	-1.20884	-1.14642	-1.30923	-0.869803	-0.965775	-1.34348	-1.16593	-1.55766	-1.08772	-0.999604	-0.935948	-1.06044	-1.11479	-1.4393	-1.28468	-1.54882	-1.80119	-1.42212	-1.16977	-0.582759	-0.631274	-0.624293	-1.81329	-1.45728	-1.10848	-1.1584	-1.21499	-1.03706	-1.42427	-1.46436	-0.612775	0.811492	0.000929605	-0.0400926	0.905066		0.121338	0.266854	-0.0565981	0.863084		0.704811	0.105097	0.356009	0.525614
-1.76405	-1.92057	-2.15255	-2.4904	-2.01293	-1.7631	-0.637356	-0.91296	-0.901979	-1.69878	-1.37577	-2.30817	-1.93227	-2.54816	-2.11119	-0.865375	-0.836596	-0.794601	-2.39032	-2.37815	-2.1741	-2.04449	-2.33209	-1.92972	-0.574775	-0.543126	-0.748528	-1.94572	-2.08881	-0.817432	-1.79424	-2.19721	-0.832191	-2.31419	-2.1021	-0.622143	1.69204	0.000753799	0.21209	0.15921		0.962049	0.0110611	-0.402969	0.276875		1.12829	0.00151322	-0.143085	0.66363
-0.288853	-0.36363	-0.465455	-0.58982	-0.481473	-0.244755	-0.224097	-0.239013	-0.0881455	-0.283228	-0.276478	-0.23125	-0.213797	0.0349233	-0.448828	-0.293358	-0.251755	-0.218542	0.381014	0.242323	0.360818	-0.0756147	-0.240001	-0.295844	0.0873487	0.00904584	0.184337	-0.372646	-0.438683	-0.183752	-0.263652	-0.209234	-0.254552	0.328052	-0.20382	0.0935771	-0.234475	0.0157551	-0.531871	0.00402063		0.00910028	0.862413	0.0544182	0.802334		0.188894	0.0292041	-0.0660369	0.672031
-0.750778	-0.647117	-0.571799	-0.184273	-0.249836	-0.360456	-0.0344093	-0.230356	-0.177723	-0.810865	-0.993148	-0.999998	-0.4233	-0.479801	-0.31826	0.169661	0.107574	0.125288	-1.3728	-1.33203	-1.65723	-0.894691	-0.931249	-0.826725	-0.654418	-0.935365	-0.558078	-0.656564	-0.264855	-0.147496	-0.934671	-0.407121	0.134174	-1.45402	-0.884221	-0.715954	0.738067	0.00720057	0.569799	0.00675876		1.06884	0.000294906	0.52755	0.00643661		0.509068	0.00220027	0.39171	0.0131086
-1.21495	-1.12197	-1.12884	-1.29113	-1.61535	-1.38892	-1.16045	-1.14073	-0.941791	-1.0388	-0.72877	-0.915704	-1.06357	-1.10472	-0.912298	-1.04033	-1.14344	-0.905218	-1.33658	-0.945648	-1.10677	-0.973343	-1.18439	-0.718586	-0.996719	-1.21624	-1.34792	-1.15525	-1.4318	-1.08099	-0.894424	-1.02686	-1.02966	-1.12966	-0.958774	-1.18696	-0.0572937	0.823958	0.170891	0.382972		-0.13524	0.184488	-0.132438	0.273991		0.0742613	0.311536	-0.276547	0.0576064
0.393456	0.384477	0.300346	0.180376	0.254525	0.298252	-0.012296	0.0577471	0.0890844	0.380075	0.354248	0.433786	0.199459	0.0867622	0.113224	0.00927067	0.155089	0.0343103	0.229619	0.286231	0.161075	-0.124956	0.0227242	-0.161475	-0.0367844	-0.183889	-0.0984888	0.359426	0.244384	0.0448452	0.389369	0.133149	0.0662235	0.225642	-0.0879021	-0.106387	-0.332029	0.00399823	-0.313544	0.00835595		-0.323146	0.00223286	-0.256221	0.0076457		-0.314581	0.00191942	-0.115042	0.0694206
-0.735827	-0.671455	-0.691436	0.105076	0.106821	0.152614	-1.40291	-2.27785	-1.59842	-1.59603	-1.26713	-1.64959	0.491335	0.650082	0.738668	-1.80653	-2.34964	-1.78929	-1.05349	-1.0827	-1.0647	2.09586	1.85715	1.73489	-1.68161	-1.78255	-1.88963	-0.699573	0.121504	-1.75973	-1.50425	0.626695	-1.98182	-1.06696	1.89597	-1.7846	-0.717634	0.000615006	2.96293	0		-0.477572	0.0421191	2.13094	0.00289744		-1.06015	0.0101028	0.821076	0
1.87693	1.90293	1.81303	1.80071	1.85257	1.89943	1.56845	1.53541	1.62973	1.71496	1.86547	1.79786	1.6938	1.70733	1.66957	1.61517	1.64553	1.66442	2.0113	2.00122	1.9202	1.59687	1.66728	1.76404	1.39697	1.34386	1.48165	1.8643	1.8509	1.57786	1.79277	1.69023	1.64171	1.97757	1.67607	1.40749	-0.57008	0.000588235	-0.301508	0.00672737		-0.15106	0.0129606	-0.102534	0.0788336		-0.286431	0.00191448	-0.0133922	0.824018
0.558252	0.61126	0.579106	0.744051	0.881546	0.926586	0.958658	0.974885	1.02659	0.449975	0.528978	0.584864	0.763241	0.749792	0.659845	1.12569	1.04909	1.06955	0.658922	0.603965	0.635876	0.701276	0.781385	0.558867	0.853259	0.694783	0.763026	0.582873	0.850728	0.986713	0.521273	0.724293	1.08144	0.632921	0.680509	0.770356	0.137435	0.0267603	0.0475879	0.564553		0.560171	0.000278317	0.20302	0.0208272		0.40384	0.000434326	0.267855	0.0174946
3.52651	3.42851	3.71662	3.74937	3.69035	3.86304	3.9082	3.81185	3.96142	3.86967	3.77959	3.81251	4.06049	3.98722	3.90391	4.18532	4.08697	4.09097	3.81662	3.70562	3.79753	3.62362	3.8142	3.65262	3.8147	3.83911	3.80462	3.55721	3.76759	3.89382	3.82059	3.98387	4.12109	3.77326	3.69682	3.81948	0.0462218	0.184264	-0.0764397	0.302429		0.3005	0.00150203	0.163284	0.0374741		0.336613	0.013557	0.210377	0.0996248
1.63819	1.65124	1.61702	1.68785	1.46523	1.55871	2.19796	2.28683	2.30299	1.71965	1.6416	1.64001	1.72405	1.79765	1.86394	2.20157	2.1576	2.11692	1.42109	1.51413	1.50385	1.44213	1.25777	1.68559	2.12112	2.29233	2.11684	1.63548	1.57059	2.26259	1.66709	1.79522	2.15869	1.47969	1.46183	2.17676	0.697072	0.000869036	-0.0178609	0.936493		0.491608	0.000329502	0.12813	0.0535846		0.627107	0	-0.0648916	0.398949
-3.32321	-4.28157	-3.23451	-2.66759	-2.60842	-3.3381	-2.46622	-2.61608	-3.11845	-3.04828	-3.47481	-3.5944	-3.16942	-2.95676	-2.71311	-2.50301	-2.78623	-2.70079	-3.31026	-3.0447	-3.39774	-3.25263	-3.61168	-3.41376	-2.67615	-2.47997	-2.57818	-3.6131	-2.87137	-2.73358	-3.3725	-2.94643	-2.66334	-3.2509	-3.42602	-2.5781	0.6728	0.0048066	-0.175123	0.273664		0.709153	0.0089334	0.426066	0.105445		0.879513	0.0469471	0.741727	0.141322
-1.40093	-1.25722	-1.3448	-1.18804	-1.50305	-1.63035	-1.37101	-1.44434	-1.51198	-1.40542	-1.57452	-1.69939	-1.39851	-1.36566	-1.32355	-1.3321	-1.63685	-1.35851	-1.38386	-1.78257	-1.74795	-1.01342	-1.03579	-0.701941	-1.36037	-1.35426	-1.49165	-1.33432	-1.44048	-1.44245	-1.55978	-1.36257	-1.44249	-1.63813	-0.917049	-1.40209	0.236035	0.0929404	0.72108	0.0105744		0.117287	0.328228	0.197204	0.0822257		-0.108128	0.0785561	-0.106163	0.537232
0.83925	0.876712	0.859149	1.06085	1.03662	1.01027	0.710301	0.822413	0.763535	0.948241	0.85913	0.724451	1.0039	1.07504	1.10165	0.853194	0.916018	0.936659	1.0964	1.18567	1.11592	1.36161	1.14296	1.67172	1.31552	1.13777	1.17502	0.85837	1.03591	0.765416	0.843941	1.0602	0.901957	1.13266	1.3921	1.20943	0.0767702	0.192308	0.259433	0.131348		0.058016	0.392654	0.216256	0.0399448		-0.092954	0.0283489	0.177544	0.00568262
-1.49642	-1.93209	-1.34914	-1.96527	-1.15087	-1.77686	-1.08205	-1.59518	-1.84809	-2.53674	-2.7605	-2.93447	-1.78948	-1.65815	-2.25662	-2.83982	-1.90838	-3.76481	-2.0377	-2.56831	-3.61856	-1.60828	-1.39211	-3.06375	-3.59169	-2.4417	-2.07074	-1.59255	-1.631	-1.50844	-2.7439	-1.90142	-2.83767	-2.74153	-2.02138	-2.70137	0.0401526	0.975738	0.720148	0.348175		-0.093764	0.936033	0.842488	0.0215483		0.0841131	0.870518	-0.038447	0.940477
-1.43003	-1.42763	-1.17385	-0.923059	-0.861192	-0.927662	-0.558728	-0.610502	-0.546004	-1.51253	-1.63793	-1.60184	-0.979842	-0.939675	-0.87163	-0.814516	-0.72075	-0.928389	-1.1238	-1.05825	-1.00319	-0.190484	-0.457944	-0.252177	-0.272732	-0.243865	-0.43094	-1.34384	-0.903971	-0.571745	-1.5841	-0.930382	-0.821218	-1.06175	-0.300202	-0.315845	0.745902	0.000793213	0.761546	0.00213049		0.762881	0.000583979	0.653717	0.00423318		0.772091	0.00114066	0.439864	0.0154404
-0.776195	-0.598955	-0.263027	-0.0631375	0.381995	0.299171	-0.0273778	0.232718	0.0838768	0.227847	-0.162054	-0.0257761	0.358318	0.261529	0.581511	0.373926	0.0829644	-0.0938787	0.139671	-0.487559	0.184826	0.0740807	-0.0991225	0.403945	0.560079	0.59441	0.435426	-0.546059	0.20601	0.0964057	0.0133392	0.400453	0.121004	-0.0543538	0.126301	0.529972	0.584325	0.03265	0.180655	0.581381		0.107665	0.652848	0.387113	0.0560171		0.642465	0.0112455	0.752068	0.0283946
-0.709371	-1.01797	-0.87026	-0.96071	-0.739057	-0.728464	-0.608536	-0.527546	-0.480345	-0.803372	-0.824689	-0.791784	-0.884903	-0.786855	-0.889629	-0.30347	-0.218535	-0.253718	-1.07591	-1.01098	-1.08846	-0.941021	-0.563639	-0.746944	-0.877292	-1.03329	-0.862082	-0.865866	-0.80941	-0.538809	-0.806615	-0.853795	-0.258574	-1.05845	-0.750535	-0.924222	0.134227	0.0486217	0.307914	0.0360701		0.548041	0.000204255	-0.0471801	0.234169		0.327057	0.0152964	0.0564555	0.738505
0.706153	0.779898	0.825783	0.891735	0.792425	0.742804	0.544583	0.460509	0.508014	0.700392	0.614578	0.649736	0.784543	0.649462	0.803878	0.358949	0.32998	0.293043	0.718903	0.797059	0.745397	1.21707	0.998937	0.922501	0.747626	0.874067	0.809995	0.770611	0.808988	0.504369	0.654902	0.745961	0.327324	0.753786	1.04617	0.810562	0.0567758	0.176656	0.292382	0.0237887		-0.327578	0.000680641	0.0910587	0.155045		-0.266243	0.00255028	0.0383767	0.596868
0.491809	0.473984	0.396512	0.450786	0.168222	0.237356	0.983354	1.01484	0.968628	0.390568	0.393958	0.442459	0.0669949	0.0977032	-0.11464	0.804532	0.872394	0.805801	0.0848925	0.066818	0.0423229	-0.561374	-0.21804	-0.257903	0.708147	0.710392	0.622897	0.454101	0.285455	0.988942	0.408995	0.016686	0.827576	0.0646778	-0.345772	0.680479	0.615801	0.00048249	-0.41045	0.0145856		0.418581	0.0002407	-0.392309	0.00913871		0.53484	0.000476008	-0.168647	0.131847
-0.642932	-0.538831	-0.561404	-0.428538	-0.409961	-0.427903	-0.653475	-0.55467	-0.49794	-0.533451	-0.599069	-0.424897	-0.353342	-0.30975	-0.447111	-0.499899	-0.491306	-0.412805	-0.318885	-0.239619	-0.293726	-0.298284	-0.275509	-0.560152	-0.360939	-0.46266	-0.442084	-0.581056	-0.422134	-0.568695	-0.519139	-0.370068	-0.468003	-0.284076	-0.377982	-0.421894	-0.137818	0.0152473	-0.0939054	0.367027		0.051136	0.34569	0.149071	0.0776778		0.0123609	0.906148	0.158922	0.0159819
-0.229635	0.268751	0.753061	0.426924	-0.738667	0.493702	-0.542063	-0.214097	0.528682	-2.31955	-2.8146	-1.73362	-3.3815	-1.79019	-0.93541	-0.66776	-0.778225	-0.696352	-0.69863	-0.596699	-0.868799	-0.56942	-0.559902	-0.60482	0.0464752	-0.075259	0.0893297	0.264059	0.0606529	-0.0758264	-2.28926	-2.0357	-0.714113	-0.721376	-0.578048	0.020182	0.741558	0.00191271	0.143329	0.111455		1.57514	0.00441388	0.253557	0.83727		-0.339885	0.447964	-0.203406	0.782618
-0.44127	-0.357166	-0.293287	-0.493398	-0.435495	-0.399637	-0.285889	-0.319706	-0.146268	-0.315037	-0.331654	-0.280122	-0.343922	-0.408505	-0.571955	-0.129538	-0.201684	-0.10248	-0.625077	-0.630243	-0.489212	-0.496965	-0.289587	-0.500872	-0.399173	-0.434114	-0.377177	-0.363908	-0.442843	-0.250621	-0.308938	-0.441461	-0.144567	-0.581511	-0.429141	-0.403488	0.178023	0.0142744	0.15237	0.106082		0.164371	0.00446086	-0.132523	0.117607		0.113287	0.101678	-0.0789355	0.192801
0.591907	0.538185	0.783202	0.774448	0.882679	1.04482	0.247404	0.236456	0.453114	0.988658	0.982511	1.08921	1.33598	1.21948	1.28538	0.842724	0.644603	0.88161	1.09418	1.12806	1.0935	1.4138	1.51115	1.1905	0.673898	0.643838	0.712448	0.637765	0.900648	0.312325	1.02013	1.28028	0.789646	1.10525	1.37182	0.676728	-0.428519	0.000846416	0.26657	0.0350099		-0.230482	0.0208703	0.260156	0.0116272		-0.32544	0.0179736	0.262883	0.0750891
1.34788	1.18871	1.19152	1.39721	1.2485	1.23601	1.52438	1.55812	1.56124	1.35964	1.28007	1.27859	1.46423	1.55107	1.5036	1.79879	1.83314	1.78344	1.2994	1.33416	1.38431	1.4144	1.39747	1.39304	1.67782	1.82415	1.71478	1.2427	1.29391	1.54792	1.3061	1.5063	1.80512	1.33929	1.40163	1.73891	0.399622	0.00191026	0.0623418	0.0497713		0.499022	0.000289855	0.200202	0.0110337		0.305215	0.00334526	0.0512094	0.591556
-1.01691	-1.05812	-0.998729	-0.889416	-0.960017	-0.867234	-0.827057	-0.77385	-0.889755	-1.19561	-1.03547	-1.21945	-0.964135	-0.973784	-1.08075	-0.906319	-0.833349	-0.835541	-1.06776	-1.06315	-1.06957	-0.803236	-0.743998	-0.946514	-0.572784	-0.569968	-0.614427	-1.02458	-0.905556	-0.830221	-1.15018	-1.00622	-0.858403	-1.06683	-0.831249	-0.585726	0.4811	0	0.235577	0.0134566		0.291775	0.00512225	0.143955	0.0959108		0.194364	0.00452595	0.119029	0.0306148
-0.225407	-0.210405	-0.0444086	-0.320778	-0.667043	-0.55106	0.573396	0.485377	0.682215	-0.55021	-0.422239	-0.610527	-1.01047	-1.14344	-1.11672	-0.178642	-0.345558	-0.225643	-0.618217	-0.463865	-0.46996	-1.02033	-0.987156	-1.09472	0.146369	0.46731	0.376081	-0.160074	-0.51296	0.580329	-0.527659	-1.09021	-0.249948	-0.517347	-1.03407	0.32992	0.847268	0.00187894	-0.516721	0.0021381		0.277711	0.00952026	-0.562553	0.00472678		0.740403	0.00113253	-0.352887	0.0457451
-0.753546	-0.826484	-0.983829	-0.514626	-0.817528	-0.563549	-0.677457	-0.446412	-0.615682	-0.854916	-1.01223	-0.669905	-0.729686	-1.10352	-0.738371	-0.656542	-0.624767	-0.735316	-0.533829	-0.580008	-0.616704	-0.970368	-0.601611	-0.808579	-0.837415	-0.935189	-0.447527	-0.85462	-0.631901	-0.57985	-0.845685	-0.857192	-0.672208	-0.576847	-0.793519	-0.740044	-0.163197	0.268137	-0.216672	0.0867468		0.173477	0.0839109	-0.011507	0.965003		0.27477	0.0247671	0.222719	0.123953
-1.0927	-1.49389	-1.25988	-1.72464	-1.47594	-1.40631	-1.46674	-1.54705	-1.37468	-1.49424	-1.59747	-1.5522	-1.7883	-1.28323	-1.73481	-1.23771	-1.29957	-1.07238	-1.34288	-1.03351	-1.0752	-1.2747	-0.923372	-1.03281	-1.06819	-1.07889	-1.29579	-1.28216	-1.53563	-1.46282	-1.54797	-1.60211	-1.20322	-1.15053	-1.07696	-1.14763	0.00290529	0.989916	0.073572	0.713096		0.344749	0.00516531	-0.0541422	0.833769		-0.180665	0.142995	-0.253475	0.166592
0.852209	0.823462	0.818963	0.508121	0.443836	0.387434	0.492323	0.506695	0.54191	0.857161	0.841911	0.804717	0.622875	0.650305	0.715863	0.381267	0.37883	0.523605	0.343281	0.35118	0.500349	0.34989	0.0820942	0.229209	0.594536	0.793693	0.588285	0.831545	0.446464	0.513643	0.834596	0.663014	0.427901	0.39827	0.220398	0.658838	0.260568	0.0215388	-0.177872	0.0946518		-0.406696	0.00116292	-0.171582	0.0113231		-0.317902	0	-0.385081	0.00561963
0.0774944	0.0353534	-0.00607181	0.0834661	0.124833	0.209758	-0.0353992	-0.101048	0.0249655	-0.260344	-0.246031	-0.00302863	0.0269063	0.0308397	0.0201962	0.0921917	0.165878	0.178549	-0.168598	-0.185261	-0.066951	0.280102	0.203575	0.171017	-0.223536	-0.327417	-0.169281	0.035592	0.139352	-0.0371605	-0.169801	0.0259807	0.14554	-0.14027	0.218231	-0.240078	-0.099808	0.10152	0.358501	0.00286007		0.315341	0.0103846	0.195782	0.0740779		-0.0727525	0.100759	0.10376	0.0812506
-0.530384	-0.961567	-1.4319	-0.718609	-1.32778	-1.51831	-1.54702	-1.23776	-0.575617	-1.08106	-0.89122	-1.51913	-1.39419	-1.28082	-1.0913	-1.14503	-1.22182	-0.854918	-1.76638	-3.15963	-1.78574	-2.44369	-3.35334	-3.22302	-1.53448	-1.45373	-1.47161	-0.974618	-1.18823	-1.12013	-1.1638	-1.25544	-1.07392	-2.23725	-3.00668	-1.48661	0.75064	0.110228	-0.769436	0.187574		0.0898801	0.815549	-0.0916332	0.763532		-0.145512	0.826421	-0.213613	0.657599
-1.45479	-1.57195	-1.46876	-1.38446	-1.48054	-1.51539	-1.09048	-1.20525	-1.00226	-1.60374	-1.54631	-1.62866	-0.846656	-0.918958	-1.03902	-1.16328	-1.26438	-1.09511	-1.35898	-1.28923	-1.18317	-0.905322	-0.733469	-0.797733	-1.06233	-0.991408	-0.986619	-1.4985	-1.46013	-1.09933	-1.5929	-0.93488	-1.17425	-1.27712	-0.812175	-1.01345	0.263674	0.00762551	0.46495	0.00459135		0.418649	0.0013356	0.658024	0.00365915		0.399171	0.00323846	0.0383732	0.578638
-0.478301	-0.566047	-0.554255	-0.288505	-0.563544	-0.39518	-0.205936	-0.14182	-0.211532	-0.59071	-0.796841	-0.66201	-0.557031	-0.452272	-0.348195	-0.135662	-0.114694	-0.0516157	-0.733892	-0.616672	-0.428026	-0.15944	-0.158358	-0.0134869	0.123667	-0.218354	-0.0297275	-0.532868	-0.415743	-0.186429	-0.683187	-0.4525	-0.100657	-0.592863	-0.110428	-0.0414716	0.551392	0.0104617	0.482435	0.00807685		0.58253	0.000892216	0.230688	0.0519172		0.346439	0.000915556	0.117125	0.238257
0.296207	0.268483	-0.0435436	-0.180065	-0.0456953	-0.0580511	-0.36957	-0.270941	-0.171398	0.324157	0.271156	0.143856	-0.770438	-0.424063	-0.801707	-0.746666	-0.702274	-0.958967	-0.240433	-0.22161	-0.589441	-0.571059	-0.347984	-0.546519	-0.876221	-0.988364	-0.975672	0.173716	-0.0946037	-0.270637	0.24639	-0.665403	-0.802636	-0.350494	-0.488521	-0.946752	-0.596258	0.00724462	-0.138026	0.368244		-1.04903	0.000599867	-0.911792	0.00607843		-0.444352	0.012841	-0.268319	0.0851296
-1.36719	-1.38924	-1.31432	-1.29596	-1.40289	-1.28547	-1.52051	-1.62316	-1.51086	-1.57525	-1.80948	-1.7407	-1.49823	-1.60825	-1.46508	-1.75966	-1.85704	-1.70682	-1.62389	-1.6087	-1.68413	-1.30715	-1.40996	-1.01805	-1.32477	-1.47276	-1.55014	-1.35691	-1.32811	-1.55151	-1.70847	-1.52386	-1.7745	-1.63891	-1.24505	-1.44922	0.189686	0.0301279	0.393854	0.0220584		-0.0660305	0.420713	0.184619	0.0811108		-0.194599	0.00637327	0.0288058	0.615015
2.4554	2.41712	2.41614	2.33406	2.33353	2.40302	2.58844	2.66644	2.5498	1.60699	1.64128	1.7259	1.59234	1.6967	1.43284	1.68139	1.66787	1.65603	2.22236	2.29762	2.30012	2.02724	2.26197	2.06153	2.15821	2.18628	2.15239	2.42955	2.35687	2.60156	1.65806	1.57396	1.66843	2.27337	2.11691	2.16563	-0.107739	0.0117578	-0.156455	0.0823862		0.0103755	0.885342	-0.0840976	0.380479		0.172006	0.00615264	-0.0726847	0.057599
0.275929	0.286101	0.235532	0.0488067	-0.190422	-0.152222	0.36419	0.456534	0.362858	-0.00788856	0.0202799	-0.0114601	-0.056504	0.0681379	0.125119	0.291446	0.370728	0.253465	-0.622992	-0.453122	-0.461382	-0.576678	-0.724311	-0.592833	0.594119	0.743079	0.546106	0.265854	-0.0979457	0.394527	0.000310421	0.0455844	0.305213	-0.512498	-0.631274	0.627768	1.14027	0.000888099	-0.118776	0.135966		0.304903	0.000950664	0.045274	0.484063		0.128673	0.0120614	-0.3638	0.0168411
1.32339	1.3747	1.54702	1.40848	0.0431638	0.961566	1.33215	1.47542	1.49854	1.33328	1.34153	1.14841	-0.944651	0.949151	-1.04943	1.14158	1.20748	1.20954	1.28012	1.17737	1.32197	0.862003	1.09902	0.747855	0.739542	0.724491	0.99966	1.41503	0.804405	1.43537	1.27441	-0.348311	1.1862	1.25982	0.902959	0.821231	-0.43859	0.00891903	-0.356863	0.0240591		-0.0882084	0.147084	-1.62272	0.0637748		0.0203358	0.898576	-0.610629	0.206665
-2.46884	-1.67554	-2.83153	-1.07142	-1.25055	-1.29324	-1.95765	-1.95934	-0.721377	-0.694219	-0.599712	-0.663743	-0.614188	-0.529464	-0.396487	-0.473902	-0.309152	-0.731349	-0.441668	-0.49868	-0.849304	-0.859471	-0.413382	-0.691957	-0.531005	-0.674718	-0.570683	-2.3253	-1.20507	-1.54612	-0.652558	-0.513379	-0.504801	-0.596551	-0.654937	-0.592135	0.00441543	0.986429	-0.0583857	0.839933		0.147757	0.190736	0.139179	0.105496		0.779185	0.136684	1.12024	0.0398806
0.00334859	0.075618	0.0294836	-0.136647	-0.166959	-0.24362	-0.186919	-0.311886	-0.23895	0.0905488	0.127516	0.127649	-0.0242727	-0.0231836	-0.177148	-0.245725	-0.262595	-0.150482	-0.160449	0.0276997	0.209825	-0.577606	-0.475831	-0.514676	-0.652663	-0.477648	-0.588938	0.0361501	-0.182409	-0.245918	0.115238	-0.074868	-0.219601	0.0256919	-0.522704	-0.573083	-0.598775	0.00646188	-0.548396	0.00764722		-0.334839	0.000845099	-0.190106	0.0255991		-0.282068	0.00211193	-0.218559	0.0118841
1.12313	1.09413	1.08973	1.21751	1.07249	1.02763	1.28105	1.24527	1.27808	1.09147	1.14457	1.01533	1.25251	1.14551	1.29487	1.3498	1.31752	1.31597	1.05916	1.09909	1.07103	1.12479	1.01701	1.22925	1.43682	1.50362	1.4534	1.10233	1.10588	1.26813	1.08379	1.23096	1.32776	1.07643	1.12368	1.46461	0.388186	0.000649215	0.0472519	0.530057		0.243971	0.00231749	0.147173	0.0610999		0.165803	0.00065529	0.00354791	0.970506
0.501616	0.572634	0.675845	0.778671	0.805242	0.790155	0.565884	0.640383	0.613979	0.727523	0.723343	0.866089	0.97368	0.920119	0.669902	0.665544	0.685278	0.563154	0.925641	0.829052	0.782081	0.663905	0.711192	0.638806	0.446044	0.548442	0.628259	0.583365	0.791356	0.606749	0.772318	0.854567	0.637992	0.845592	0.671301	0.540915	-0.304677	0.00845649	-0.174291	0.0151773		-0.134326	0.0398112	0.0822486	0.515506		0.0233835	0.793999	0.207991	0.0240689
-0.698523	-0.534868	-0.61996	-0.598311	-0.559541	-0.568523	-0.459126	-0.532048	-0.528189	-0.812031	-0.786036	-0.712692	-0.789692	-0.918465	-1.0025	-0.598526	-0.754002	-0.692688	-0.486797	-0.596841	-0.68637	-0.884738	-0.725348	-0.906828	-0.860277	-0.975162	-0.831853	-0.617783	-0.575458	-0.506454	-0.770253	-0.903551	-0.681739	-0.590002	-0.838971	-0.889098	-0.299095	0.0105045	-0.248969	0.0265509		0.0885146	0.0876921	-0.133298	0.11317		0.111329	0.0570407	0.0423251	0.47083
-0.565188	-0.574305	-0.60455	-0.66086	-0.651648	-0.600977	-0.693028	-0.481714	-0.530903	-0.546449	-0.585161	-0.396458	-0.395248	-0.381595	-0.559263	-0.240457	-0.215135	-0.259407	-0.437407	-0.704578	-0.717773	-1.0183	-1.07627	-1.03381	-0.52429	-0.701799	-0.576055	-0.581348	-0.637828	-0.568548	-0.509356	-0.445369	-0.238333	-0.619919	-1.04279	-0.600715	0.0192049	0.924927	-0.422874	0.00938292		0.271024	0.00533779	0.0639877	0.512822		0.0127996	0.917325	-0.0564808	0.0680579
-1.29813	-1.2644	-1.11945	-0.450351	-0.557026	-0.498624	-1.53316	-0.909177	-1.36714	-1.48204	-1.05764	-1.48781	-0.665913	-0.62851	-0.2367	-1.7066	-1.74999	-1.6259	-0.74408	-0.685981	-0.614659	-0.529036	-0.669836	-0.420201	-1.16875	-0.830632	-1.11332	-1.22733	-0.502	-1.26983	-1.3425	-0.510374	-1.69416	-0.681573	-0.539691	-1.03757	-0.355997	0.0195584	0.141882	0.117374		-0.351667	0.0328141	0.832123	0.0185448		-0.0424992	0.90786	0.725327	0.00696
-0.0659659	-0.501514	0.0685503	-0.150194	-0.270767	-0.310011	-0.310966	-0.300387	-0.775038	-0.00833917	-0.42144	-0.0163901	-0.223701	-0.633756	-0.933095	-0.667882	-0.625263	-2.43482	-0.414626	-1.11135	-0.724856	-1.07493	-0.693343	-0.823004	-0.757709	-1.17118	-0.972027	-0.16631	-0.243657	-0.46213	-0.148723	-0.596851	-1.24266	-0.750278	-0.863759	-0.96697	-0.216693	0.359763	-0.113482	0.731523		-1.09393	0.0708301	-0.448128	0.130297		-0.29582	0.18236	-0.0773475	0.770467
-0.955206	-0.667707	0.13694	0.356075	0.330706	-1.84786	0.0302441	-2.13146	-1.3972	-0.182076	-0.47186	-2.02084	-2.62241	-0.800093	-0.989969	-2.72015	-1.02639	-0.862638	-0.654926	-0.632244	-0.816027	-0.729288	-0.908093	-1.30326	-0.876229	-1.39803	-1.11081	-0.495324	-0.387028	-1.16614	-0.891591	-1.47082	-1.53639	-0.701066	-0.980215	-1.12836	-0.427294	0.0320762	-0.279149	0.152614		-0.644803	0.442544	-0.579233	0.570713		-0.670814	0.335381	0.108297	0.936482
0.903761	0.854407	0.880713	1.09989	1.32437	1.2448	1.25844	1.2846	1.14263	0.974599	0.951798	0.840067	1.26123	1.42729	1.47443	1.47457	1.36477	1.44526	0.77673	0.91355	0.932686	1.56296	1.3406	1.53771	1.5223	1.45245	1.4314	0.879627	1.22302	1.22856	0.922155	1.38765	1.4282	0.874322	1.48042	1.46871	0.594393	0.000951629	0.606101	0.0032401		0.506047	0.000727075	0.465495	0.00797145		0.348928	0.00185775	0.343395	0.0152055
1.08708	1.26177	1.00575	1.15734	1.13126	1.10825	1.64385	1.71185	1.68494	0.910772	1.05175	1.03891	1.09792	1.17755	0.842007	2.0748	1.94197	1.93275	1.13187	0.892555	0.881384	0.876425	0.903213	0.82374	1.29504	1.21137	1.36336	1.1182	1.13228	1.68021	1.00048	1.03916	1.98317	0.968603	0.867792	1.28992	0.321319	0.0162284	-0.10081	0.270369		0.982695	0.000252583	0.0386781	0.823592		0.562015	0.00189965	0.0140828	0.911851
-0.136865	-0.123716	-0.164772	-0.397164	-0.291759	-0.209214	-0.289032	-0.341697	-0.43215	-0.317209	-0.321103	-0.263255	-0.304871	-0.369075	-0.388052	-0.253632	-0.231739	-0.324188	-0.37274	-0.472304	-0.467756	-0.9076	-0.600396	-0.918608	-0.61679	-0.799934	-0.685725	-0.141784	-0.299379	-0.354293	-0.300522	-0.353999	-0.269853	-0.4376	-0.808868	-0.700816	-0.263216	0.00989301	-0.371268	0.0200451		0.0306691	0.322556	-0.053477	0.147561		-0.212509	0.00538316	-0.157595	0.0536098
-0.227302	-0.186037	-0.196131	-0.191959	-0.167222	-0.128828	-0.270828	-0.336863	-0.278789	-0.0894864	-0.0718417	0.0366642	-0.0419719	-0.0984981	-0.107839	-0.191395	-0.15324	-0.147686	-0.186651	-0.230235	-0.229076	-0.385936	-0.219672	-0.436426	-0.252269	-0.334862	-0.207535	-0.203157	-0.16267	-0.295493	-0.0415546	-0.0827698	-0.164107	-0.21532	-0.347345	-0.264889	-0.0495684	0.202146	-0.132025	0.0876815		-0.122553	0.0186513	-0.0412152	0.41934		-0.0923367	0.0112923	0.0404867	0.139486
-0.680815	-0.739314	-0.722879	-1.2611	-1.03189	-1.17426	-1.1601	-1.1683	-1.33576	-0.38301	-0.354898	-0.462926	-0.973733	-1.04447	-0.888665	-1.01143	-0.979589	-1.05577	-0.972606	-0.980941	-0.950015	-0.592093	-0.60359	-0.556367	-0.44708	-0.698164	-0.48689	-0.714336	-1.15575	-1.22139	-0.400278	-0.968955	-1.0156	-0.967854	-0.584016	-0.544045	0.423809	0.00501827	0.383837	0		-0.615318	0.00026538	-0.568677	0.00394667		-0.507051	0.00133172	-0.441413	0.010341
1.75358	1.72436	1.80435	1.41273	1.38747	1.38533	1.12619	1.05263	1.14377	1.90702	1.88551	1.82111	1.479	1.33226	1.47607	1.10323	1.05775	1.09636	1.68476	1.69676	1.70575	1.26782	1.36574	1.18912	1.26268	1.50963	1.40095	1.76076	1.39518	1.10753	1.87121	1.42911	1.08578	1.69576	1.27423	1.39109	-0.304671	0.00960938	-0.421529	0.0022845		-0.785435	0.000362264	-0.442102	0.00455263		-0.653231	0	-0.365586	0.00538235
0.0445607	-0.113662	-0.108054	-0.275894	-0.281206	-0.254004	-0.444483	-0.448217	-0.368536	0.0144737	-0.0538816	-0.0253785	-0.0703232	-0.158702	-0.179177	-0.131118	-0.181297	-0.155683	-0.759603	-0.795368	-0.79626	-0.321759	-0.0927043	-0.209131	-0.321966	-0.584804	-0.382459	-0.0590519	-0.270368	-0.420412	-0.0215955	-0.136067	-0.156033	-0.783743	-0.207865	-0.429743	0.354	0.00911497	0.575879	0.00208353		-0.134437	0.00327959	-0.114472	0.0425936		-0.36136	0.00253941	-0.211316	0.0244477
2.21741	2.12667	2.18387	2.26338	2.23691	2.34943	2.13057	2.15763	2.25511	2.14448	2.1986	2.25735	2.28069	2.46161	2.24972	2.30271	2.22662	2.33343	2.27135	2.29197	2.32218	2.32904	2.3498	2.18086	2.11189	1.96148	2.1245	2.17598	2.28324	2.1811	2.20014	2.33067	2.28759	2.29517	2.28657	2.06596	-0.229208	0.00989613	-0.00860008	0.928328		0.0874454	0.0586976	0.130533	0.137301		0.00511901	0.953526	0.107256	0.0714105
-1.1215	-1.22917	-0.904569	-0.831463	-1.01094	-0.930105	-1.10626	-1.1145	-1.13678	-1.13333	-1.54816	-1.15516	-1.05376	-0.941984	-1.02649	-1.39435	-1.23006	-1.07077	-1.11164	-1.15814	-1.05634	-0.780303	-0.971098	-0.900148	-1.08451	-1.27642	-1.14704	-1.08508	-0.924171	-1.11918	-1.27889	-1.00741	-1.23173	-1.10871	-0.88385	-1.16932	-0.0606139	0.342021	0.224858	0.017024		0.0471565	0.88547	0.271475	0.11184		-0.0340988	0.837537	0.16091	0.211425
-1.64231	-1.50505	-1.56377	-1.17881	-1.40105	-1.21008	-1.15694	-1.2481	-1.32674	-1.46237	-1.47845	-1.97742	-2.22891	-1.8051	-1.86985	-1.77752	-1.68149	-1.76986	-1.27009	-1.28289	-1.44922	-1.54205	-1.63845	-1.61656	-1.6288	-1.69542	-1.3951	-1.57038	-1.26331	-1.24393	-1.63941	-1.96795	-1.74296	-1.33407	-1.59902	-1.5731	-0.239035	0.050368	-0.264951	0.0119655		-0.103544	0.656187	-0.328539	0.184646		0.326451	0.00442105	0.307063	0.0268868
-1.03195	-1.01325	-1.3352	-0.931339	-0.469828	-0.52298	-1.17503	-1.57985	-1.43013	-1.47237	-1.68321	-1.29063	-0.905759	-0.723252	-1.17757	-1.36536	-2.61042	-2.01685	-2.24669	-2.51233	-2.43028	-1.35989	-1.4173	-1.2837	-2.26493	-2.10231	-2.23688	-1.1268	-0.641382	-1.395	-1.48207	-0.935527	-1.99754	-2.39644	-1.35363	-2.20138	0.195061	0.0589389	1.04281	0.00126667		-0.515475	0.135823	0.546541	0.0370614		-0.268205	0.0962375	0.485417	0.0596219
0.930124	1.02702	0.930513	0.913949	1.08166	0.934615	0.777222	0.682297	0.724851	0.912095	0.98997	0.967713	1.11909	0.829002	0.978886	0.816689	0.835727	0.815854	1.00084	0.988147	0.948601	0.817494	0.926609	0.706638	0.720773	0.609392	0.878532	0.962554	0.976743	0.728124	0.956593	0.975661	0.822757	0.979195	0.816914	0.736233	-0.242962	0.0219806	-0.162281	0.0480108		-0.133836	0.00295928	0.019068	0.89602		-0.23443	0.00362551	0.0141887	0.888369
0.785629	0.783181	0.792188	0.766905	0.48093	0.664597	0.683574	0.624913	0.782051	0.173377	0.193101	-0.254372	-0.0467327	-0.201572	-0.0341775	-0.21338	-0.43615	-0.256622	0.398329	0.151757	0.173557	0.898888	0.888173	0.909983	0.396133	0.426187	0.587848	0.786999	0.637477	0.696846	0.0373688	-0.0941608	-0.302051	0.241214	0.899015	0.470056	0.228841	0.0448145	0.6578	0.00221156		-0.339419	0.0454306	-0.13153	0.472649		-0.0901534	0.0684764	-0.149522	0.146316
-0.233098	-0.12017	-0.268872	0.0167117	0.0558138	-0.0161614	0.327486	0.242339	0.345091	-0.375801	-0.274149	-0.255145	-0.0209067	-0.130498	-0.255018	0.345243	0.1962	0.374665	-0.0357239	0.00350118	0.00340486	-0.357378	-0.108931	-0.40312	0.0861928	0.0492899	0.0700626	-0.20738	0.018788	0.304972	-0.301699	-0.135474	0.305369	-0.00960596	-0.289809	0.0685151	0.0781211	0.00774564	-0.280203	0.0273602		0.607068	0.000850281	0.166224	0.0897167		0.512352	0.00117012	0.226168	0.0183312
0.782802	0.728855	0.852928	0.931941	0.907129	0.696438	0.97522	1.01096	0.790042	0.928623	0.865298	0.861027	1.00968	1.07782	1.15654	1.06766	1.0164	0.975922	0.809788	0.821045	0.886855	0.851954	0.704831	0.878697	1.0583	1.19134	1.11477	0.788195	0.84517	0.925408	0.884983	1.08135	1.01999	0.839229	0.811827	1.12147	0.282239	0.00345116	-0.0274021	0.752124		0.135011	0.00836162	0.196364	0.0193523		0.137212	0.0864319	0.0569743	0.595978
-0.742251	-1.02796	-1.11235	-1.44317	-1.61024	-1.70203	-0.989869	-0.885953	-0.81242	-1.05722	-1.18877	-1.32232	-1.39488	-1.58274	-1.66475	-1.0725	-1.25546	-1.00933	-1.2901	-1.53041	-0.947385	-0.680042	-0.62648	-0.375958	-0.93891	-1.25544	-1.27979	-0.960852	-1.58515	-0.896081	-1.18944	-1.54746	-1.11243	-1.25597	-0.560827	-1.15805	0.0979197	0.74751	0.69514	0.0166669		0.0770116	0.51062	-0.358019	0.0348529		0.064771	0.718887	-0.624295	0.0176686
1.17369	1.27605	1.14639	1.00321	0.939541	0.84265	0.825841	0.661467	0.762448	1.00349	0.915438	0.997571	1.1198	0.99457	1.12826	1.04838	0.732924	0.956151	1.00044	1.09664	1.02068	1.29531	1.35392	1.38283	0.940916	1.01999	0.911263	1.19871	0.928466	0.749919	0.972167	1.08088	0.912485	1.03925	1.34402	0.957389	-0.0818662	0.0778015	0.304766	0.00241851		-0.0596817	0.648047	0.108709	0.0946597		-0.448792	0.00190914	-0.270246	0.0196094
-0.021353	0.0779498	0.171363	-0.0694561	-0.106548	-0.453551	-0.255597	-0.150501	-0.186211	0.214837	0.179709	0.0745094	-0.276784	0.0209529	0.212375	-0.29599	-0.0846491	-0.653178	-0.277497	-0.23844	-0.228943	0.532625	0.144503	0.219566	-0.628071	-0.229068	-0.70618	0.0759865	-0.209852	-0.197437	0.156352	-0.0144853	-0.344606	-0.248293	0.298898	-0.521106	-0.272813	0.0814619	0.547191	0.00903956		-0.500958	0.0188651	-0.170837	0.303215		-0.273423	0.0079646	-0.285838	0.100551
1.73203	1.70409	1.69762	1.36765	1.41994	1.37436	0.873478	0.898576	1.0114	1.73654	1.78268	1.83517	1.4641	1.38402	1.26656	1.0076	0.940142	1.04343	1.35086	1.34935	1.29377	0.308635	0.384264	0.304351	0.572842	0.577014	0.539205	1.71124	1.38731	0.927819	1.7848	1.37156	0.997056	1.33133	0.332417	0.56302	-0.768309	0	-0.998912	0		-0.78774	0.000386643	-0.413238	0.00742656		-0.783425	0	-0.323931	0.00285714
0.161276	0.0974367	0.268668	0.707747	0.666256	0.585637	1.76727	1.78481	1.81879	0.317602	0.308937	0.504052	0.462098	0.542866	0.0933778	2.03966	1.95262	2.03951	0.604605	0.490448	0.523979	0.0387399	0.167866	0.113966	1.17669	1.23594	1.33977	0.175794	0.653213	1.79029	0.376864	0.366114	2.0106	0.539677	0.106857	1.2508	0.711121	0.000649351	-0.43282	0.00208837		1.63373	0.000262295	-0.0107499	0.966418		1.6145	0	0.47742	0.0065363
-1.62854	-1.28313	-1.34563	-1.03584	-1.26516	-1.31636	-1.05093	-1.14831	-0.991709	-0.51979	-1.21336	-0.643464	-1.26524	-1.32353	-1.23189	-1.05764	-0.9432	-1.18842	-1.01862	-0.8656	-0.823939	-1.916	-1.12953	-1.59951	-1.11969	-0.985502	-1.02254	-1.4191	-1.20579	-1.06365	-0.792205	-1.27355	-1.06309	-0.90272	-1.54834	-1.04258	-0.139859	0.0697634	-0.645624	0.0370773		-0.270882	0.180727	-0.481347	0.0829692		0.35545	0.0198749	0.213316	0.191507
1.04683	1.13459	1.13	1.17278	1.19489	1.19728	0.988595	0.962346	0.93794	1.17857	1.13243	1.18155	1.3028	1.21545	1.32712	0.949466	0.920525	0.877282	1.3614	1.38008	1.37259	1.35547	1.49037	1.42729	1.2094	1.13091	1.08432	1.10381	1.18832	0.96296	1.16418	1.28179	0.915757	1.37136	1.42438	1.14155	-0.229812	0.00337068	0.0530178	0.210499		-0.248425	0.000715048	0.117608	0.037074		-0.140848	0.00750714	0.0845098	0.0522848
-0.879967	-1.03959	-0.834573	-0.491438	-0.506642	-0.532203	0.00145841	0.0491579	0.0383117	-0.711641	-0.729544	-0.573769	-0.334846	-0.414473	-0.544112	0.0668502	0.0414295	0.0935636	-0.156943	-0.334582	-0.230817	-0.146472	-0.0619998	-0.314276	0.0820177	0.052233	0.11894	-0.918042	-0.510094	0.0296427	-0.671651	-0.431144	0.0672811	-0.24078	-0.174249	0.0843968	0.325177	0.00416939	0.0665313	0.544726		0.738932	0.000227038	0.240508	0.0388655		0.947685	0.000381538	0.407948	0.00998176
-0.664145	-0.842841	-0.793296	-0.676821	-0.507466	-0.539672	-1.46932	-0.973233	-0.673753	-0.664758	-0.960381	-1.07525	-0.126506	-0.422295	0.00464082	-1.10793	-1.15756	-0.762924	-0.59288	-0.57597	-0.617769	0.556157	0.228714	0.324504	-0.924493	-1.08083	-0.884604	-0.766761	-0.574653	-1.03877	-0.900129	-0.181387	-1.00947	-0.59554	0.369792	-0.963308	-0.367768	0.00391535	0.965332	0.0013621		-0.109341	0.628195	0.718743	0.0196926		-0.272008	0.227984	0.192107	0.0662729
-0.837964	-1.06979	-0.608395	-1.18578	-0.521004	-0.918528	-2.04964	-2.17148	-2.53557	-1.20655	-1.33235	-1.16772	-0.493549	-1.21927	-1.50841	-0.744848	-0.86161	-0.70525	-0.659701	-1.31349	-0.894146	-0.422702	-0.627942	-0.240045	-1.46386	-1.25632	-1.26815	-0.838718	-0.875104	-2.25223	-1.23554	-1.07374	-0.770569	-0.955778	-0.43023	-1.32944	-0.373666	0.0807805	0.525548	0.053255		0.464971	0.00177557	0.161799	0.707242		-1.41351	0.00188653	-0.0363861	0.927089
-0.398042	-0.717504	-0.703579	0.132561	0.107403	0.186634	0.662211	0.720683	-0.00437474	-1.07831	-1.01151	-2.04708	-0.281788	-1.23754	-0.315291	-0.289007	-0.306885	-1.33052	-1.73052	-0.999107	-1.52375	-0.662894	-1.03156	-0.584394	-0.683622	-1.84276	-1.12924	-0.606375	0.142199	0.459506	-1.37897	-0.611539	-0.642136	-1.41779	-0.759617	-1.21854	0.199249	0.739273	0.658172	0.0442283		0.736832	0.1024	0.767428	0.153612		1.06588	0.00857827	0.748574	0.00904682
1.19163	1.12301	1.13633	1.30767	1.25371	1.2169	0.988368	1.06599	1.12626	1.10569	1.08553	1.21186	1.16323	1.2576	1.116	0.983797	0.866359	1.00967	1.51285	1.46844	1.63274	1.69801	1.51108	1.73927	1.24009	0.95561	0.996932	1.15032	1.25943	1.06021	1.13436	1.17894	0.953274	1.53801	1.64945	1.06421	-0.4738	0.00752901	0.111444	0.225854		-0.181085	0.0165195	0.0445832	0.520169		-0.0901133	0.0655391	0.109107	0.0393906
3.77296	3.84905	3.86831	4.10806	4.08031	3.98288	3.886	3.9608	3.87291	3.58529	3.55634	3.45258	3.94281	3.79903	3.98803	3.747	3.69556	3.72592	3.50452	3.58589	3.53635	3.97867	3.77837	3.86373	3.87146	3.98657	3.79963	3.83011	4.05708	3.90657	3.5314	3.90996	3.72282	3.54225	3.87359	3.88589	0.343635	0.00451163	0.331336	0.00676079		0.191419	0.00570104	0.378553	0.0111888		0.0764643	0.0729425	0.226974	0.0172207
-0.552358	-0.633602	-0.438285	-0.290905	-0.123081	-0.102354	-0.11109	-0.159949	-0.0721548	-0.383797	-0.345452	-0.439399	-0.103338	-0.00868535	-0.194437	0.232227	0.210022	0.202354	-0.734123	-0.804446	-0.629247	-0.0232508	0.0696087	-0.162688	-0.0617368	-0.201949	-0.0139494	-0.541415	-0.172113	-0.114398	-0.389549	-0.102153	0.214868	-0.722605	-0.0387766	-0.092545	0.63006	0.00166166	0.683829	0.00235172		0.604417	0.000211454	0.287396	0.0142749		0.427017	0.00211331	0.369302	0.0194742
-0.438302	-0.46366	-0.431562	-0.656003	-0.671158	-0.637417	-0.413687	-0.433599	-0.38045	-0.752183	-0.548219	-0.57933	-0.568049	-0.682479	-0.853092	-0.360244	-0.452432	-0.344234	-0.156156	-0.280629	-0.213117	-0.425056	-0.513049	-0.441978	-0.525873	-0.550717	-0.38944	-0.444508	-0.65486	-0.409245	-0.626577	-0.701207	-0.385636	-0.216634	-0.460028	-0.488677	-0.272043	0.00901181	-0.243394	0.00666107		0.240941	0.0122986	-0.0746295	0.568803		0.0352627	0.0719691	-0.210351	0.00507317
0.853174	0.829558	0.902469	1.61673	1.46848	1.4676	1.74499	1.83594	1.72912	0.184886	0.181521	0.227531	1.01127	1.02055	1.11618	1.49231	1.51394	1.52441	0.329856	0.383281	0.359	1.60395	1.3313	1.6399	1.2373	1.20229	1.18556	0.861734	1.5176	1.77002	0.197979	1.04933	1.51022	0.357379	1.52505	1.20838	0.851001	0	1.16767	0.00125768		1.31224	0	0.851355	0.00344444		0.908283	0	0.655869	0.00618667
-1.31883	-1.92258	-0.925131	-1.25468	-0.892452	-1.05929	-1.24776	-1.3702	-1.21066	-0.647688	-1.66195	-0.77971	-1.43934	-1.40479	-1.33353	-1.5439	-1.5125	-1.50193	-1.95784	-0.915871	-1.68233	-1.23725	-1.77903	-1.45788	-1.62109	-1.46084	-1.35352	-1.38885	-1.06881	-1.27621	-1.02978	-1.39255	-1.51944	-1.51868	-1.49139	-1.47848	0.040196	0.948688	0.027293	0.966446		-0.489657	0.10204	-0.362766	0.310759		0.11264	0.822078	0.320042	0.375449
-1.95358	-1.87103	-1.9801	-1.82469	-1.72193	-2.06317	-1.7931	-1.62758	-1.86698	-1.60139	-1.93455	-1.76932	-1.17088	-1.46255	-1.74326	-1.86493	-1.67203	-1.4199	-1.77085	-1.66767	-1.80168	-2.12319	-1.93098	-1.86986	-1.47691	-1.53205	-1.51319	-1.9349	-1.86993	-1.76255	-1.76842	-1.4589	-1.65229	-1.74673	-1.97468	-1.50739	0.239347	0.00502382	-0.227945	0.040703		0.116133	0.512724	0.309521	0.165761		0.172351	0.0501281	0.0649707	0.651214
-0.788511	-0.515532	-0.636499	-0.88054	-0.796887	-0.811979	-0.915113	-0.771629	-1.05144	-0.615161	-0.670444	-0.595047	-0.645419	-0.757279	-0.771047	-0.842346	-0.804016	-0.663625	-0.418044	-0.36724	-0.36925	-1.17897	-0.984575	-1.28078	-0.765003	-0.889251	-0.761933	-0.646847	-0.829802	-0.912727	-0.626884	-0.724582	-0.769996	-0.384845	-1.14811	-0.805396	-0.420551	0.00124351	-0.763265	0.00211792		-0.143111	0.0311232	-0.0976973	0.0911297		-0.265879	0.0420603	-0.182955	0.092715
-1.24778	-1.45084	-1.3887	-1.11039	-1.03917	-1.09155	-0.804348	-0.928595	-0.83932	-1.36923	-1.30235	-1.42897	-1.13541	-0.866275	-1.16007	-0.939144	-0.993826	-0.936004	-1.60131	-1.48419	-1.44367	-1.3896	-1.2125	-1.44438	-1.40715	-1.47377	-1.51227	-1.36244	-1.08037	-0.857421	-1.36685	-1.05392	-0.956325	-1.50972	-1.34883	-1.4644	0.045326	0.457324	0.160899	0.095708		0.410524	0.000700173	0.31293	0.0380815		0.505018	0.0018884	0.282067	0.0196959
-1.1444	-1.08342	-1.08457	-0.935999	-0.868617	-0.74974	-0.629477	-0.619621	-0.730241	-1.86612	-1.9773	-1.86452	-1.51474	-1.55229	-1.53488	-1.16249	-1.00072	-1.16718	-1.58048	-1.38343	-1.63182	-1.23208	-1.28145	-1.19307	-0.912514	-1.15548	-1.2735	-1.10413	-0.851452	-0.659779	-1.90265	-1.53397	-1.11013	-1.53191	-1.23553	-1.11383	0.418077	0.0195784	0.296374	0.0151037		0.79252	0.000259623	0.36868	0.00439552		0.444351	0.00039541	0.252678	0.0206836
-1.66968	-1.71357	-1.488	-1.30568	-1.49114	-1.50261	-1.19455	-1.32868	-1.32609	-1.61341	-1.73468	-1.6262	-1.40157	-1.36487	-1.3893	-1.32276	-1.24817	-1.16188	-1.40627	-1.42002	-1.27115	-1.48076	-1.33492	-1.43846	-1.12681	-1.23919	-1.16535	-1.62375	-1.43314	-1.28311	-1.6581	-1.38524	-1.24427	-1.36581	-1.41805	-1.17712	0.188698	0.0186577	-0.0522323	0.48843		0.413826	0.00169189	0.272852	0.00631376		0.340646	0.00878714	0.19061	0.111207
-0.340104	-0.577463	-0.463123	-0.382279	-0.56145	-0.551849	-0.371382	-0.277773	-0.497357	-0.449703	-0.445814	-0.656724	-0.808818	-0.620893	-0.673616	-0.240384	-0.132635	-0.150089	-0.389745	-0.714377	-0.576121	-0.811703	-0.971375	-0.509017	-0.112765	-0.152651	0.0358582	-0.46023	-0.498526	-0.382171	-0.517414	-0.701109	-0.174369	-0.560081	-0.764031	-0.076519	0.483562	0.00914211	-0.203951	0.249892		0.343044	0.00584322	-0.183695	0.100578		0.0780595	0.415179	-0.0382963	0.775139
-1.01742	-1.0075	-1.12252	-0.852675	-0.684404	-0.79877	-0.745664	-0.805159	-1.1217	-0.661777	-0.798562	-0.996046	-0.819114	-0.453753	-0.641326	-0.934105	-1.00496	-0.69189	-0.776869	-0.560054	-0.478325	-0.210977	-0.326125	-0.401311	-0.708976	-0.908989	-0.840356	-1.04914	-0.778616	-0.890842	-0.818795	-0.638064	-0.876984	-0.605083	-0.312804	-0.81944	-0.214357	0.0653003	0.292278	0.0350883		-0.0581892	0.807239	0.180731	0.263004		0.158301	0.176032	0.270526	0.0203172
0.85529	1.02974	1.0149	1.13797	1.19573	1.1798	1.38462	1.33137	1.41156	1.00063	0.886728	1.09945	1.27703	1.06846	1.06369	1.51977	1.40758	1.50026	1.23797	1.24251	1.22131	1.06448	1.24934	1.01632	1.36735	1.28713	1.40629	0.966644	1.17117	1.37585	0.995605	1.13639	1.47587	1.23393	1.11005	1.35359	0.119661	0.0176025	-0.123878	0.118652		0.480265	0.00177897	0.140787	0.191387		0.409207	0.00212264	0.204525	0.0329701
-1.10686	-1.19164	-1.11128	-1.14125	-1.13706	-1.17421	-1.2619	-1.31809	-1.27262	-1.27637	-1.28184	-1.25014	-1.25965	-1.25758	-1.17163	-1.29833	-1.3565	-1.42539	-0.771617	-0.777153	-0.759165	-0.791766	-0.646192	-0.778043	-0.900635	-0.97465	-1.04004	-1.13659	-1.15084	-1.2842	-1.26945	-1.22962	-1.36007	-0.769312	-0.738667	-0.971774	-0.202462	0.00652254	0.0306446	0.60616		-0.0906207	0.0330263	0.0398297	0.249824		-0.14761	0.00680902	-0.0142478	0.742903
-1.71188	-1.51394	-1.23651	-0.543543	-0.752558	-1.58731	-0.440906	-0.491201	-0.220169	-0.555699	-0.169868	-0.217635	-0.414115	-0.574606	-0.38153	-0.0307689	-0.228673	-0.335599	1.73343	1.75262	1.71778	0.466861	0.216259	0.847415	-0.0508826	0.216604	-0.284615	-1.48745	-0.961137	-0.384092	-0.314401	-0.45675	-0.198347	1.73461	0.510178	-0.0396309	-1.77424	0.000653595	-1.22443	0.00411875		0.116053	0.456841	-0.14235	0.350719		1.10335	0.00210338	0.526308	0.20269
-1.39999	-1.45122	-1.49289	-1.67961	-1.91323	-1.81932	-2.0299	-1.84373	-2.20354	-1.32712	-1.25431	-1.29863	-1.64132	-1.65758	-1.67727	-2.20006	-2.33946	-2.0759	-1.22796	-1.33457	-1.12113	-1.74664	-1.59636	-1.61353	-1.48954	-1.28422	-1.4863	-1.44803	-1.80405	-2.02572	-1.29335	-1.65872	-2.20514	-1.22789	-1.65218	-1.42002	-0.192132	0.0587927	-0.42429	0.00649549		-0.911787	0.00048	-0.365367	0.00297368		-0.577691	0.0039286	-0.35602	0.0164642
2.51796	2.56428	2.69182	2.84618	2.89778	2.99941	2.57827	2.6764	2.75661	2.6974	2.70812	2.75573	2.857	2.93703	2.78056	2.6215	2.60413	2.73369	3.04817	2.9098	2.95261	3.04241	3.03468	2.83292	2.55152	2.61701	2.66337	2.59136	2.91446	2.67043	2.72041	2.85819	2.65311	2.97019	2.97	2.61064	-0.359555	0.00276874	-0.000188351	0.998281		-0.0673057	0.105201	0.137779	0.0467602		0.0790707	0.255009	0.3231	0.0174582
0.104733	0.081928	-0.0431135	-0.452869	-0.61406	-0.778101	-1.56022	-1.3748	-1.49319	0.324193	0.255891	0.131818	-0.22075	-0.158737	-0.0592883	-1.06294	-1.12862	-1.13286	0.0821693	0.104767	0.236324	-0.15552	-0.161757	0.230402	-0.613618	-0.90282	-0.72437	0.0478491	-0.61501	-1.47607	0.237301	-0.146258	-1.10814	0.141087	-0.0289586	-0.746936	-0.888023	0.00147653	-0.170045	0.252691		-1.34544	0.000237624	-0.383559	0.0124018		-1.52392	0	-0.662859	0.0105069
0.278389	0.31793	0.363351	0.52995	0.617618	0.617218	0.716342	0.755883	0.764117	0.0837772	0.0678077	0.136967	0.376734	0.324939	0.349593	0.573033	0.590223	0.577606	0.139173	0.133544	0.0973399	0.310267	0.378953	0.243648	0.482466	0.664623	0.629607	0.31989	0.588262	0.745447	0.0961839	0.350422	0.580288	0.123352	0.310956	0.592232	0.46888	0.00176235	0.187604	0.00927742		0.484104	0.000244898	0.254238	0.00459714		0.425557	0.000383308	0.268372	0.00872068
3.7286	3.68116	3.55281	3.32858	3.33093	3.26088	2.59668	2.64161	2.60127	3.7378	3.7283	3.50775	3.42451	3.58715	3.62822	2.7767	2.70536	2.59548	3.37643	3.30304	3.27968	3.29675	3.08587	3.34498	3.00216	3.00193	2.76408	3.65419	3.3068	2.61319	3.65795	3.54663	2.69251	3.31972	3.24253	2.92272	-0.396994	0.00740756	-0.0771858	0.420677		-0.965436	0.000630137	-0.111321	0.307617		-1.041	0	-0.347393	0.011048
-2.04471	-1.91771	-1.91054	-1.51617	-1.63466	-1.60075	-1.76024	-1.95487	-1.80426	-1.86066	-1.99906	-1.7209	-1.24059	-1.19758	-1.24419	-1.44518	-1.69364	-1.55018	-1.92097	-1.72587	-1.87693	-1.45827	-1.5908	-1.27618	-1.35987	-1.36063	-1.7235	-1.95765	-1.58386	-1.83979	-1.86021	-1.22746	-1.563	-1.84125	-1.44175	-1.48133	0.359922	0.0312362	0.399504	0.0153549		0.297208	0.0224933	0.632752	0.00471446		0.117865	0.108728	0.373796	0.00978495
-0.443048	-0.453657	-0.857226	-0.833357	-0.238773	-0.268545	-0.630345	-1.12234	-1.7139	-0.221468	-0.221138	-0.163765	0.102546	-1.49555	-0.745296	-0.134564	-0.324894	-0.181204	-0.133173	0.439204	0.0769317	-0.309342	-0.6003	-0.164326	-0.363351	-0.125293	-0.263196	-0.584644	-0.446892	-1.15553	-0.202124	-0.712765	-0.213554	0.127654	-0.357989	-0.250613	-0.378267	0.0589734	-0.485643	0.0578856		-0.0114304	0.928332	-0.510642	0.323455		-0.570886	0.10025	0.137752	0.670361
-0.266932	-0.585596	-0.251479	-1.03443	-1.5945	-1.40851	-1.42793	-1.15006	-1.64234	-0.262663	-0.302559	-0.0325315	-1.37995	-1.30572	-1.47764	-1.64758	-1.35767	-1.87729	-0.241622	-0.143895	-0.203121	-1.30908	-1.53053	-1.32851	-2.03278	-1.74642	-2.54055	-0.368003	-1.34581	-1.40677	-0.199251	-1.38777	-1.62751	-0.196213	-1.38937	-2.10658	-1.91037	0.00175766	-1.19316	0		-1.42826	0.00104979	-1.18852	0.00385185		-1.03877	0.00310902	-0.97781	0.0157083
0.222543	0.331404	0.266803	0.271004	0.453242	0.505059	0.425001	0.207269	0.346711	-0.0281932	0.125039	-0.0232685	0.0729301	0.184199	-0.0553548	0.144226	0.179132	0.144857	-0.0380003	-0.0266964	-0.00788856	0.0449135	0.0366139	0.000437737	-0.0400321	-0.0938265	-0.0382352	0.273583	0.409768	0.326327	0.0245258	0.0672581	0.156072	-0.0241951	0.0273217	-0.0573646	-0.0331695	0.107874	0.0515169	0.0243281		0.131546	0.0279123	0.0427323	0.728475		0.0527439	0.506037	0.136185	0.151791
-0.589788	-0.5173	-0.561847	-0.729792	-0.884551	-0.880863	-0.604685	-0.511343	-0.585325	-0.0238411	-0.102609	-0.15989	-0.448805	-0.571195	-0.410085	-0.457588	-0.447265	-0.435944	-0.306977	-0.136036	-0.263821	-0.1619	-0.286271	-0.181551	-0.124862	-0.0473406	0.0255432	-0.556312	-0.831735	-0.567118	-0.0954467	-0.476695	-0.446932	-0.235611	-0.209908	-0.0488865	0.186725	0.0281574	0.0257037	0.793839		-0.351486	0.000944664	-0.381248	0.0078746		-0.0108062	0.865456	-0.275423	0.0155547
-0.43126	-0.344342	-0.385329	-0.353964	-0.596295	-0.282516	-0.436072	-0.295498	-0.706906	-0.484254	-0.30747	-0.377512	-0.502522	-0.5385	-0.585089	-0.484973	-0.26794	-0.284608	-0.566497	-0.418411	-0.808414	-0.159996	-0.0437174	-0.140682	-0.195347	-0.492008	-0.129483	-0.386977	-0.410925	-0.479492	-0.389745	-0.542037	-0.34584	-0.597774	-0.114799	-0.272279	0.325495	0.0626216	0.482975	0.0124283		0.0439046	0.747748	-0.152292	0.0525795		-0.092515	0.497975	-0.0239481	0.880682
0.470776	0.506479	0.535312	0.798139	1.00094	0.889599	0.797934	0.736008	0.775621	0.772903	0.964892	0.922158	0.965024	0.984983	0.990345	0.823263	0.830033	0.849394	0.771902	0.924341	0.849549	0.973394	0.862329	0.885258	0.799687	0.745178	0.743091	0.504189	0.896227	0.769854	0.886651	0.980117	0.83423	0.848598	0.906994	0.762652	-0.0859457	0.0854839	0.0583962	0.334476		-0.0524208	0.339153	0.0934664	0.170547		0.265665	0.000709626	0.392038	0.010366
-0.418204	-0.22661	-0.511339	-1.807	-0.357313	-0.444086	-0.696234	-1.76258	-0.8439	-0.171925	-0.394621	-0.133286	-0.534302	-0.72973	-0.667651	-0.466589	-0.641768	-0.949949	-0.0285003	-0.252382	0.336668	-0.624364	0.44012	-0.139452	0.176357	-0.357363	-0.690948	-0.385384	-0.869466	-1.1009	-0.233277	-0.643895	-0.686102	0.0185951	-0.107898	-0.290651	-0.309246	0.30365	-0.126494	0.8188		-0.452825	0.0221389	-0.410617	0.0193043		-0.715519	0.059142	-0.484082	0.387646
-0.48022	-0.372671	-0.384699	-0.0442419	-0.0839591	-0.0552158	0.0148962	0.00925183	0.0694726	-0.304921	-0.309905	-0.311963	-0.0872629	-0.0558045	-0.110782	0.187913	0.189122	0.219695	-0.172873	-0.257849	-0.248482	-0.0558808	0.0889521	-0.207298	0.00765729	-0.134176	-0.092957	-0.41253	-0.0611389	0.0312068	-0.30893	-0.0846166	0.19891	-0.226401	-0.0580757	-0.0731587	0.153243	0.0217506	0.168326	0.0990009		0.50784	0	0.224313	0.00433161		0.443737	0.00042344	0.351391	0.00566834
-0.51946	-0.437289	-0.408067	-0.0479436	0.234454	0.102895	1.18385	1.18762	1.27242	-0.0550053	-0.0255284	0.0753882	0.173601	0.220377	0.157295	1.27542	1.19642	1.26797	0.175933	0.169215	0.242227	-0.118494	-0.13355	-0.180971	0.824176	0.905303	0.884945	-0.454939	0.0964686	1.21463	-0.00171518	0.183758	1.2466	0.195792	-0.144338	0.871475	0.675683	0.000510288	-0.34013	0.00114409		1.24832	0.000359551	0.185473	0.0182316		1.66957	0	0.551407	0.0109552
-0.251856	-0.290591	-0.114449	-0.672992	-0.366579	-0.258105	-0.197438	-0.271989	-0.177454	-0.0476363	-0.0885878	0.0734646	-0.298085	-0.10847	-0.348921	-0.145526	-0.0727854	0.00987148	-0.138717	-0.0434721	-0.010874	-0.698733	-0.748937	-0.874421	-0.528331	-0.606249	-0.443897	-0.218965	-0.432559	-0.215627	-0.0209198	-0.251825	-0.0694799	-0.0643545	-0.77403	-0.526159	-0.461804	0.00232665	-0.709676	0.00125349		-0.0485601	0.499336	-0.230906	0.0550808		0.00333786	0.977471	-0.213593	0.1871
-1.22326	-0.913804	-1.12656	-0.791461	-1.32988	-1.02361	-0.16645	0.0294788	-0.0410593	-1.18785	-1.45306	-1.19895	-2.07678	-1.97055	-1.37875	-0.24334	-0.840978	-0.264068	-1.68367	-1.44087	-1.56783	-1.45248	-1.72409	-1.99793	-0.561584	-0.638981	-1.27084	-1.08787	-1.04832	-0.0593436	-1.27995	-1.80869	-0.449462	-1.56412	-1.72483	-0.823803	0.740321	0.0202708	-0.160708	0.407603		0.83049	0.00864277	-0.52874	0.080626		1.02853	0.000969439	0.0395567	0.893754
-0.546898	-0.402157	-0.26381	-0.251423	-0.305891	-0.37351	-0.335012	-0.147304	-0.325155	-0.434808	-0.739281	-0.704277	-0.456927	-0.226002	-0.383184	-0.277938	-0.396981	-0.185537	-0.377332	-0.480166	-0.785487	-0.0303733	-1.11761	-0.24348	-0.346208	-0.586543	-0.602204	-0.404288	-0.310275	-0.269157	-0.626122	-0.355371	-0.286819	-0.547662	-0.46382	-0.511652	0.0360099	0.895989	0.0838413	0.887689		0.339303	0.0178778	0.270752	0.0775053		0.135132	0.16699	0.0940138	0.366002
-1.35164	-1.11891	-1.2372	-1.07991	-1.09873	-1.02309	-1.50149	-1.15397	-1.38652	-1.07968	-1.12071	-1.23836	-1.13164	-0.854461	-0.748592	-1.24939	-1.38965	-1.30968	-0.536008	-0.32464	-0.338822	-0.702991	-0.600261	-0.60184	-0.985317	-0.906831	-1.07601	-1.23592	-1.06724	-1.34733	-1.14625	-0.911565	-1.31624	-0.399823	-0.635031	-0.989385	-0.589562	0.00269712	-0.235207	0.026034		-0.169986	0.0236136	0.234687	0.118485		-0.111409	0.35548	0.168674	0.0789597
0.0180323	0.0455472	0.00201058	-0.045125	0.0967169	0.0450535	0.365291	0.433473	0.516236	-0.240696	-0.225218	-0.228637	-0.129994	-0.190189	-0.246364	0.468018	0.428079	0.503119	-0.0292108	-0.140679	-0.169665	-0.136455	-0.0713468	-0.220671	0.142096	-0.0188529	0.221468	0.0218634	0.0322151	0.438333	-0.231517	-0.188849	0.466405	-0.113185	-0.142824	0.114904	0.228089	0.0284694	-0.0296392	0.73511		0.697922	0.000564706	0.0426679	0.264019		0.41647	0.00114324	0.0103517	0.883193
1.34783	1.30973	1.44187	1.81578	1.72316	1.71048	1.69596	1.71748	1.59808	1.22479	1.31388	1.2419	1.7308	1.72054	1.84628	1.50836	1.55719	1.58953	1.59037	1.61604	1.6585	1.96569	1.75964	1.82811	1.92237	2.09572	1.91675	1.36648	1.7498	1.67051	1.26019	1.76587	1.55169	1.62164	1.85115	1.97828	0.356643	0.00461052	0.229509	0.0166585		0.291497	0.00116187	0.505678	0.00412065		0.304026	0.00337866	0.383323	0.00686721
0.000887632	-0.0123422	0.158637	0.482052	0.224605	0.369564	0.122751	0.163324	0.11552	-0.0807798	-0.167944	-0.121547	0.346844	0.311067	0.507312	0.125995	0.16571	-0.0340858	0.141797	0.209834	0.380001	0.95523	0.81626	0.933313	0.632192	0.594708	0.35253	0.0490609	0.35874	0.133865	-0.123424	0.388408	0.0858733	0.243877	0.901601	0.526476	0.282599	0.0370907	0.657724	0.00236743		0.209297	0.0148186	0.511832	0.00483791		0.0848041	0.129611	0.309679	0.0365243
-0.531094	-0.451855	-0.546899	-0.994922	-0.724507	-0.569016	-0.182139	0.0876243	-0.245965	-0.544008	-0.510948	-0.445044	-1.32217	-0.945551	-1.26225	-0.507901	-0.496209	-0.5657	-0.949746	-0.995176	-1.00241	-0.550303	-0.486745	-0.383268	-0.62686	-1.16184	-0.652514	-0.509949	-0.762815	-0.113493	-0.5	-1.17666	-0.52327	-0.982445	-0.473439	-0.813739	0.168706	0.33437	0.509007	0.00138125		-0.0232704	0.610265	-0.676658	0.00963636		0.396456	0.0119264	-0.252866	0.116577
-1.7254	-1.80548	-1.49975	-1.34549	-1.47486	-1.12025	-1.50415	-1.86733	-1.7508	-1.62824	-1.90928	-1.6984	-1.66678	-1.48324	-1.87222	-2.05478	-1.90289	-1.53923	-1.37377	-1.24606	-1.27124	-1.11671	-1.07758	-1.05903	-1.09172	-1.01872	-1.38622	-1.67688	-1.31353	-1.70743	-1.74531	-1.67408	-1.8323	-1.29702	-1.08444	-1.16555	0.131469	0.257207	0.212579	0.00748515		-0.0869942	0.754728	0.0712256	0.723967		-0.0305511	0.908192	0.363346	0.064
-1.15797	-1.36	-1.30262	-1.30001	-1.1389	-1.15099	-1.242	-1.44601	-1.31679	-1.37965	-1.40102	-1.2197	-1.00598	-1.06717	-1.1058	-0.913181	-1.03425	-0.933894	-1.34675	-1.26507	-1.39162	-1.17867	-0.917087	-1.17515	-1.11611	-1.21688	-1.24377	-1.27353	-1.19663	-1.33493	-1.33346	-1.05965	-0.960442	-1.33448	-1.0903	-1.19225	0.142223	0.0319411	0.244176	0.0428802		0.373014	0.00327331	0.273804	0.018196		-0.0614038	0.523752	0.0768961	0.412396
-0.598065	-0.697003	-0.6852	-0.790827	-0.935991	-0.90481	-0.292543	-0.330362	-0.253408	-0.691326	-0.957596	-1.00741	-0.685723	-0.510952	-0.996753	-0.592655	-0.623577	-0.429104	-1.51176	-1.66092	-1.34459	-1.54123	-1.54165	-1.44281	-0.848803	-0.766411	-0.896447	-0.660089	-0.87721	-0.292104	-0.885445	-0.731143	-0.548445	-1.50576	-1.50856	-0.83722	0.668537	0.00292133	-0.00280364	0.987539		0.337	0.018861	0.154303	0.440523		0.367985	0.000982709	-0.21712	0.0244558
-0.652883	-0.762775	-0.612546	-0.470994	-0.483223	-0.299583	-0.648157	-0.529186	-0.854364	-0.126843	-0.225673	-0.352504	-0.415651	-0.310055	-0.319612	-1.09638	-1.12743	-0.940311	-0.143107	-0.156086	-0.0772755	-1.42274	-1.19966	-1.10932	-0.403788	-0.245132	-0.217908	-0.676068	-0.417933	-0.677236	-0.235007	-0.348439	-1.05471	-0.125489	-1.24391	-0.288943	-0.163453	0.0337185	-1.11842	0.00120362		-0.819699	0.00070937	-0.113433	0.182052		-0.00116746	0.996083	0.258135	0.0334307
0.959493	0.844105	1.01417	1.37286	1.15653	1.06366	1.13114	1.00899	1.22778	0.874373	0.953137	0.881138	0.878266	1.00745	0.99593	1.05795	1.02839	0.952345	0.633968	0.7191	0.87712	0.469228	0.124794	0.739978	1.47081	1.59906	1.35592	0.939257	1.19768	1.12264	0.902882	0.960549	1.0129	0.743396	0.444667	1.47526	0.731867	0.00245235	-0.298729	0.152584		0.110014	0.0231983	0.0576667	0.287717		0.183381	0.0464516	0.258427	0.0722944
1.44651	1.48892	1.52713	1.50926	1.52911	1.50244	1.13075	1.11824	1.10498	1.70113	1.70851	1.74411	1.59423	1.49012	1.4823	1.15765	1.18476	1.14187	1.99385	2.0236	1.95794	1.70597	1.65733	1.51048	1.30832	1.29179	1.41542	1.48752	1.5136	1.11799	1.71792	1.52222	1.16143	1.9918	1.62459	1.33851	-0.653285	0.000812095	-0.367203	0.0058872		-0.556488	0.000518919	-0.1957	0.0130719		-0.369524	0.000399356	0.0260874	0.364157
1.81046	1.80798	1.82402	1.92512	1.88517	1.8939	1.72725	1.70682	1.84241	2.08548	2.03387	1.99627	1.98085	2.02743	2.02848	1.74895	1.69854	1.74321	2.041	2.05375	2.05897	1.92433	1.83886	1.95007	2.00103	2.02898	2.02327	1.81415	1.9014	1.75883	2.03854	2.01225	1.73023	2.05124	1.90442	2.01776	-0.0334822	0.0178857	-0.146824	0.0105915		-0.308303	0.000716736	-0.0262849	0.457285		-0.0553284	0.173969	0.0872405	0.00972222
0.644871	0.712253	0.558348	0.129531	0.0747905	0.0806937	0.714429	0.671193	0.752561	-0.00490832	0.0811176	-0.0617769	-0.261041	-0.417826	-0.361254	0.476866	0.439677	0.359042	-0.503977	-0.496226	-0.581833	0.122334	0.113204	0.155201	0.340492	0.494744	0.462758	0.638491	0.0950052	0.712728	0.00481081	-0.346707	0.425195	-0.527345	0.130246	0.432665	0.96001	0.000738095	0.657591	0		0.420384	0.00126198	-0.351518	0.00922727		0.0742369	0.132891	-0.543486	0.00674419
-0.18659	-0.169563	-0.151864	-0.1094	-0.070785	0.0122776	-0.192119	-0.154374	-0.25191	-0.0376871	-0.0988626	-0.0474288	0.0372965	-0.00206876	0.010833	-0.22207	-0.236465	-0.142863	-0.041476	0.0447032	-0.0548365	-0.0286915	0.117526	-0.0414519	-0.24339	-0.284129	-0.293306	-0.169339	-0.0559692	-0.199468	-0.0613262	0.0153536	-0.200466	-0.0172031	0.0157942	-0.273609	-0.256406	0.00247079	0.0329973	0.687389		-0.13914	0.00772809	0.0766798	0.0296594		-0.030129	0.297336	0.11337	0.044884
-1.56355	-1.21402	-1.21807	-1.0462	-0.849426	-0.898214	-1.35669	-1.16498	-1.22683	-1.41967	-1.31946	-1.37855	-1.35232	-1.23158	-1.39227	-1.47563	-1.20614	-1.29093	-1.36189	-1.59544	-1.59398	-1.94393	-1.46784	-1.80405	-2.08979	-1.78939	-1.85781	-1.33188	-0.931281	-1.2495	-1.37256	-1.32539	-1.32424	-1.51711	-1.73861	-1.91233	-0.395225	0.0183184	-0.221502	0.202078		0.0483281	0.68932	0.0471725	0.479295		0.0823801	0.615705	0.400598	0.0440256
-2.28843	-2.63168	-2.3023	-1.95296	-1.66002	-1.78357	-1.19866	-0.933598	-0.96618	-2.86739	-2.76437	-2.20023	-2.46894	-2.30893	-2.273	-0.984702	-1.18874	-1.14314	-2.16699	-2.37506	-2.86085	-2.16641	-2.56449	-2.20211	-1.43061	-1.26531	-1.34287	-2.40747	-1.79885	-1.03281	-2.61066	-2.35029	-1.10553	-2.46763	-2.31101	-1.34626	1.12137	0.00519033	0.156626	0.612016		1.50514	0.00147697	0.260369	0.283253		1.37466	0.000929323	0.608625	0.0209707
0.471879	0.623744	0.683222	0.873439	0.78067	0.681981	0.894115	0.965875	1.07409	1.10606	1.1267	1.00799	1.16163	1.08062	1.1599	1.2855	1.26283	1.32123	0.529727	0.510144	0.545094	0.503359	0.402546	0.285304	0.973933	1.03495	0.994613	0.592948	0.778697	0.978027	1.08025	1.13405	1.28985	0.528322	0.39707	1.00117	0.472843	0	-0.131252	0.0787371		0.209603	0.00387938	0.0537989	0.290099		0.385079	0.0060981	0.185748	0.0914817
0.979901	1.17238	1.04814	0.913448	0.799737	0.757077	0.297693	0.27722	0.218611	1.20231	1.194	1.13989	0.971656	0.772689	1.05637	0.0830255	0.176149	0.110767	1.40687	1.44518	1.38502	1.35681	1.18229	1.51139	1.04221	1.11031	1.02046	1.06681	0.823421	0.264508	1.17873	0.933573	0.123314	1.41236	1.35016	1.05766	-0.354696	0.000789863	-0.062194	0.615081		-1.05542	0.000554913	-0.245161	0.0465336		-0.802298	0.000416157	-0.243386	0.0369144
-1.13722	-1.09168	-1.06964	-0.910389	-0.863454	-0.872716	-0.176574	-0.134982	-0.224078	-1.07	-1.05858	-0.924075	-0.956403	-0.979089	-1.01255	-0.277328	-0.244195	-0.265241	-0.76597	-0.859231	-0.873573	-1.40408	-1.27176	-1.39195	-0.488625	-0.447654	-0.365447	-1.09951	-0.882186	-0.178545	-1.01755	-0.982679	-0.262254	-0.832925	-1.35593	-0.433908	0.399016	0.00180079	-0.523004	0.00162482		0.755294	0.000269608	0.0348693	0.578349		0.92097	0	0.217328	0.00483757
0.479512	0.482451	0.576397	0.514937	0.649748	0.578765	0.807791	0.863753	0.798576	0.627875	0.646677	0.72242	0.524106	0.502548	0.463403	1.05066	1.1118	1.17574	0.384666	0.350886	0.429547	0.378177	0.596909	0.396887	0.70459	0.518063	0.582914	0.512787	0.58115	0.823373	0.665658	0.496685	1.11273	0.388366	0.457325	0.601856	0.21349	0.0146161	0.0689584	0.405111		0.447075	0.000740331	-0.168972	0.0135062		0.310587	0.00140672	0.0683634	0.245253
0.206681	0.256951	0.312402	0.148839	0.0823908	0.0506787	-0.0183041	0.0146043	-0.0788524	0.0647652	0.134315	0.244749	0.0435917	-0.146139	-0.157669	-0.092443	-0.0452719	-0.130701	0.24167	0.250404	0.207401	0.0341403	0.102537	-0.0869298	-0.223148	-0.274708	-0.113064	0.258678	0.0939695	-0.0275174	0.147943	-0.086739	-0.089472	0.233158	0.0165824	-0.20364	-0.436798	0.00173835	-0.216576	0.0141781		-0.237415	0.00717406	-0.234682	0.0477543		-0.286195	0.00205577	-0.164709	0.0256545
2.86481	2.90125	2.88721	2.97677	3.08304	3.01632	2.64902	2.62908	2.73653	2.63253	2.52273	2.73066	2.63655	2.64267	2.43229	2.49387	2.60134	2.58254	2.70213	2.75747	2.68117	2.73567	2.82812	2.46102	2.53046	2.49533	2.54111	2.88442	3.02538	2.67154	2.62864	2.5705	2.55925	2.71359	2.67493	2.5223	-0.19129	0.00258021	-0.0386561	0.827195		-0.0693911	0.260508	-0.0581348	0.628441		-0.212879	0.00282363	0.140954	0.0213383
0.126824	-0.06898	-0.0967419	-0.879124	-1.0418	-0.779213	-0.391372	-0.441681	-0.467935	0.186307	0.187191	0.242285	-0.978659	-0.915162	-0.963073	-0.248107	-0.243092	-0.281362	-0.784705	-0.793948	-0.597765	-0.754718	-0.351233	-0.60528	-0.71639	-0.762549	-0.578346	-0.0129661	-0.900046	-0.433663	0.205261	-0.952298	-0.25752	-0.725473	-0.57041	-0.685762	0.0397111	0.758839	0.155063	0.283006		-0.462781	0.000210526	-1.15756	0		-0.420697	0.00328681	-0.88708	0.00544465
-0.918343	-1.14129	-1.06999	-1.06362	-1.31082	-1.14375	-1.29939	-1.3164	-1.16839	-1.02653	-1.0751	-1.12065	-1.23928	-1.23604	-1.38194	-1.33051	-1.72576	-1.48169	-1.04821	-1.33808	-1.28625	-1.96924	-1.79034	-1.69863	-1.2233	-1.37012	-1.14721	-1.04321	-1.17273	-1.26139	-1.07409	-1.28575	-1.51265	-1.22418	-1.8194	-1.24688	-0.022694	0.914743	-0.595222	0.00752542		-0.438561	0.00964447	-0.211661	0.0225837		-0.218185	0.029044	-0.129524	0.257819
0.424462	0.457183	0.464081	0.553179	0.691819	0.605149	0.545149	0.461478	0.536608	0.252137	0.239341	0.443676	0.502191	0.409549	0.483599	0.466289	0.477478	0.465666	0.478258	0.456256	0.367901	0.418497	0.458169	0.204553	0.308968	0.225963	0.355743	0.448575	0.616716	0.514412	0.311718	0.465113	0.469811	0.434138	0.360406	0.296891	-0.137247	0.0304337	-0.0737319	0.455809		0.158093	0.032912	0.153395	0.0914846		0.0658363	0.0474756	0.16814	0.0248599
0.736322	0.25022	0.82319	1.33623	0.841768	1.18784	0.827935	0.618391	0.918089	0.586153	0.080709	0.270042	0.332464	1.01737	0.472631	0.196175	0.395134	0.400244	-0.572271	0.419494	0.423669	0.267939	0.328429	0.349013	0.391575	-0.0843947	0.485137	0.603244	1.12195	0.788138	0.312301	0.607487	0.330517	0.0902973	0.315127	0.264106	0.173808	0.763743	0.22483	0.590462		0.018216	0.958058	0.295186	0.301867		0.184894	0.342812	0.518702	0.0889304
-0.280826	-0.526478	-0.533585	-0.347631	-0.556135	-0.595356	-0.604888	-0.302236	-0.394341	-0.0589917	-0.24645	-0.137605	-0.102035	-0.177162	-0.247943	-0.588294	-0.294932	-0.590167	-0.689979	-0.53488	-0.426405	-0.964765	-0.679609	-0.461905	-0.493778	0.0228922	-0.18876	-0.446963	-0.499707	-0.433822	-0.147682	-0.175713	-0.491131	-0.550421	-0.702093	-0.219882	0.33054	0.0693274	-0.151672	0.41378		-0.343449	0.0165809	-0.028031	0.788582		0.0131416	0.954951	-0.0527438	0.749368
1.32382	1.47539	1.29603	1.65805	1.67356	1.55996	1.78165	1.63412	1.69308	1.28031	1.22399	1.25976	1.75995	1.32893	1.71632	1.68507	1.75208	1.64406	1.23397	1.34403	1.23017	1.2098	1.15232	1.1481	1.45231	1.40694	1.55443	1.36508	1.63052	1.70295	1.25468	1.60173	1.69374	1.26939	1.17007	1.47122	0.201836	0.0157726	-0.0993145	0.0549523		0.439054	0.000278768	0.34705	0.0622277		0.337869	0.00560877	0.265442	0.0245844
2.86678	2.71742	2.70434	0.633425	1.65936	1.62574	1.72014	0.869583	0.371069	1.77395	1.95235	1.99654	1.07458	-0.402954	0.855049	-0.313182	0.205667	-0.632934	1.13127	1.28281	1.37903	-0.198267	0.628896	0.449063	0.70925	0.449475	-0.416429	2.76285	1.30617	0.986931	1.90761	0.50889	-0.246816	1.26437	0.293231	0.247432	-1.01694	0.0244598	-0.971138	0.0150981		-2.15443	0.000951567	-1.39872	0.0410189		-1.77592	0.00715803	-1.45667	0.0214559
-1.248	-1.13816	-1.22026	-1.3485	-1.38273	-1.25129	-1.29052	-1.21589	-1.10899	-1.0675	-1.47199	-1.25866	-1.07788	-0.88596	-0.916855	-1.07001	-1.08736	-1.03987	-0.970371	-1.02651	-0.923903	-0.824363	-1.04877	-0.750303	-0.847047	-1.1611	-1.0217	-1.20214	-1.3275	-1.20513	-1.26605	-0.960233	-1.06574	-0.973595	-0.87448	-1.00995	-0.0363519	0.819672	0.0991141	0.336048		0.200301	0.079743	0.305812	0.0751033		-0.00299724	0.979414	-0.125368	0.0744076
-2.18475	-1.96882	-2.10446	-1.75417	-1.7107	-1.64939	-1.61578	-1.7136	-1.61824	-1.81996	-1.81668	-1.73162	-1.53453	-1.7615	-1.48224	-1.2413	-1.32418	-1.22171	-1.54324	-1.57095	-1.7918	-3.72268	-2.22456	-2.16456	-1.36238	-1.27978	-1.25423	-2.08601	-1.70475	-1.64921	-1.78942	-1.59276	-1.2624	-1.63533	-2.70394	-1.29879	0.336535	0.0115352	-1.06861	0.0769926		0.527024	0.000277643	0.196662	0.0873976		0.436803	0.00275158	0.381258	0.0128284
-0.53304	-0.567633	-0.643039	-0.781984	-0.787226	-0.833877	-0.495131	-0.550864	-0.483357	-0.555124	-0.716915	-0.544342	-0.612475	-0.511342	-0.632348	-0.294424	-0.115087	-0.202333	-0.610739	-0.604316	-0.476486	-0.573303	-0.826803	-0.55653	-0.488576	-0.41885	-0.612594	-0.581237	-0.801029	-0.509784	-0.60546	-0.585388	-0.203948	-0.563847	-0.652212	-0.506673	0.0571738	0.461744	-0.0883644	0.4252		0.401512	0.00362935	0.0200721	0.850299		0.0714533	0.0785595	-0.219792	0.0111387
-0.173305	-0.0778005	0.0263155	0.0954461	0.183122	0.252033	0.759199	0.686278	0.66271	-0.194958	-0.279464	-0.0724723	0.210344	0.162929	-0.0960939	0.814783	0.755747	0.806998	0.492519	0.516196	0.510393	0.407799	0.394787	0.253066	0.567373	0.450638	0.591005	-0.0749301	0.176867	0.702729	-0.182298	0.0923928	0.792509	0.506369	0.351884	0.536339	0.0299696	0.573078	-0.154485	0.0260558		0.974808	0.000258519	0.274691	0.0669798		0.777659	0.000354906	0.251797	0.0340362
0.663738	0.755957	0.701345	0.474499	0.475166	0.385725	-0.462425	-0.6716	-0.662147	0.572091	0.554459	0.462531	0.462953	0.347932	0.488182	-0.781162	-0.574863	-0.751701	0.815662	0.767991	0.622669	0.960473	0.892819	1.16908	-0.0525262	0.179312	0.0680356	0.707013	0.44513	-0.598724	0.529694	0.433022	-0.702576	0.735441	1.00746	0.0649405	-0.6705	0.00237028	0.272018	0.0390875		-1.23227	0.000310734	-0.0966715	0.138946		-1.30574	0	-0.261883	0.00977362
-0.52895	-0.417843	-0.458567	-0.825268	-0.632331	-0.664112	-0.797053	-0.739027	-0.93167	-0.632181	-0.671268	-0.43373	-0.518251	-0.546508	-0.68793	-0.35674	-0.414845	-0.458096	-0.43504	-0.247409	-0.255548	0.0384214	0.0320854	-0.0710254	-0.443168	-0.417678	-0.551589	-0.468453	-0.707237	-0.822584	-0.57906	-0.58423	-0.409894	-0.312666	-0.000172853	-0.470812	-0.158146	0.0553904	0.312493	0.0100668		0.169166	0.0438291	-0.00516995	0.973283		-0.35413	0.00393864	-0.238784	0.0327108
0.607018	0.72217	0.713183	0.477667	0.400666	0.4282	0.80015	0.796815	0.722865	0.543702	0.511747	0.463061	0.370669	0.243204	0.216562	0.50426	0.451636	0.471938	0.705807	0.704766	0.543714	0.122337	0.254444	0.0370502	0.427039	0.527499	0.566483	0.68079	0.435511	0.773277	0.50617	0.276812	0.475945	0.651429	0.137944	0.507007	-0.144422	0.0569182	-0.513485	0.00552026		-0.0302253	0.227826	-0.229358	0.0175005		0.0924864	0.060467	-0.245279	0.0121009
-1.63834	-1.49153	-1.59588	-1.24597	-1.19777	-1.16697	-1.02316	-1.04115	-1.01736	-0.903867	-0.819292	-0.904632	-0.355204	-0.430219	-0.338155	-0.307542	-0.344382	-0.257362	-0.796662	-0.829254	-0.767421	0.100286	-0.107361	-0.158188	-0.0689805	0.233036	0.0548878	-1.57525	-1.20357	-1.02722	-0.87593	-0.374526	-0.303095	-0.797779	-0.0550878	0.0729812	0.87076	0.000939551	0.742691	0.00161691		0.572835	0.000246637	0.501404	0.00423704		0.548026	0.000375691	0.37168	0.00659474
0.46265	0.349348	0.266829	0.789346	0.544892	0.374188	0.796993	0.703005	0.76389	0.353483	0.167531	0.287544	0.405368	0.398642	0.276768	0.683556	0.607943	0.544342	0.200795	0.142492	0.128398	0.255687	0.328017	0.182638	0.436194	0.336511	0.478634	0.359609	0.569475	0.754629	0.269519	0.360259	0.611947	0.157229	0.255447	0.417113	0.259884	0.00499558	0.0982184	0.0770949		0.342427	0.0042245	0.0907401	0.243305		0.39502	0.00254919	0.209866	0.187717
0.201793	0.457704	-0.0357759	0.554677	0.619493	0.541991	0.247609	0.390492	0.116564	0.306026	0.381341	0.249328	1.07258	1.346	1.48542	0.494312	0.563265	0.357545	0.361024	0.355265	0.36702	1.79519	1.509	1.94654	0.624913	0.74281	0.617972	0.207907	0.572053	0.251555	0.312232	1.30133	0.471707	0.361103	1.75024	0.661899	0.300796	0.00248372	1.38914	0.00147082		0.159475	0.0397817	0.989101	0.00477833		0.0436479	0.884966	0.364146	0.0699816
-0.0843031	-0.119485	-0.0716841	-0.238595	-0.19344	-0.0966268	-0.193979	-0.170616	-0.202018	-0.364498	-0.573324	-0.455745	-0.366648	-0.567023	-0.492615	-0.126124	-0.089891	-0.112252	-0.498947	-0.603134	-0.564939	-0.329122	-0.105378	-0.31635	-0.182012	-0.307513	-0.266403	-0.0918241	-0.176221	-0.188871	-0.464523	-0.475429	-0.109422	-0.555673	-0.250283	-0.251976	0.303697	0.00339561	0.30539	0.0136774		0.3551	0.00261043	-0.010906	0.940399		-0.097047	0.00334781	-0.0843964	0.12654
-0.526337	-0.497545	-0.513207	-0.454875	-0.591804	-0.573477	-0.410678	-0.535214	-0.540818	-0.413149	-0.478997	-0.416372	-0.524647	-0.580746	-0.456755	-0.458665	-0.46468	-0.451676	-0.500986	-0.497232	-0.511719	-0.517604	-0.353066	-0.288174	-0.502874	-0.591356	-0.396335	-0.512363	-0.540052	-0.49557	-0.436172	-0.520716	-0.45834	-0.503312	-0.386281	-0.496855	0.00645757	0.953609	0.117031	0.122848		-0.022168	0.256737	-0.0845436	0.104037		0.0167928	0.81935	-0.0276891	0.634617
1.8825	1.91811	1.87858	1.87676	2.00703	2.20779	2.083	2.30161	2.2089	1.26112	1.32414	1.42469	1.4642	1.56511	1.36946	1.8912	1.8103	1.82704	1.41213	1.24417	1.39319	1.44676	1.41769	1.3439	1.41411	1.3059	1.43315	1.89306	2.03053	2.19784	1.33665	1.46626	1.84285	1.34983	1.40278	1.38439	0.0345562	0.719245	0.0529504	0.453412		0.506196	0.000714667	0.129604	0.139776		0.304776	0.00599541	0.137467	0.229843
-0.375764	-0.580372	-0.679642	-0.983331	-1.04982	-0.998254	-1.03091	-0.841853	-0.956813	-0.717554	-0.55619	-0.861914	-1.05258	-1.0473	-1.26944	-0.813694	-0.904953	-0.900342	-1.12692	-0.916578	-0.816517	-1.0922	-0.863515	-0.924342	-0.923797	-0.772788	-0.743839	-0.545259	-1.01047	-0.943193	-0.711886	-1.12311	-0.872996	-0.953338	-0.960018	-0.813475	0.139863	0.18028	-0.00668065	0.975581		-0.16111	0.0764943	-0.41122	0.0262148		-0.397934	0.0113437	-0.465208	0.0153963
0.246319	0.227308	0.365775	0.0304422	0.172676	0.178139	-0.252117	-0.366522	-0.244421	0.615938	0.622541	0.718862	0.388181	0.310373	0.307005	-0.0792384	-0.13434	-0.051343	0.356177	0.337685	0.298928	-0.389174	-0.186877	-0.590916	-0.493081	-0.383228	-0.389099	0.279801	0.127086	-0.287687	0.652447	0.335186	-0.0883072	0.33093	-0.388989	-0.421803	-0.752732	0.000449275	-0.719919	0.00555164		-0.740754	0.000346457	-0.317261	0.00486364		-0.567487	0.000997805	-0.152715	0.0805901
-0.00650096	0.0684717	0.246556	0.496036	0.367434	0.435841	0.506968	0.57769	0.517045	0.325951	0.469102	0.222359	0.60219	0.563478	0.702235	0.753554	0.652359	0.779368	0.322355	0.328405	0.428973	0.550482	0.358096	0.518694	0.525834	0.752078	0.613215	0.102842	0.433103	0.533901	0.339138	0.622634	0.728427	0.359911	0.475757	0.630376	0.270465	0.0141996	0.115846	0.127663		0.38929	0.00466705	0.283497	0.0302699		0.431059	0.00370442	0.330261	0.0252493
2.01752	2.00377	1.92274	1.79741	1.83631	1.96693	1.61492	1.54833	1.5944	1.94484	2.02671	1.91534	1.7564	1.80917	1.84399	1.29368	1.24973	1.25628	1.67051	1.89362	1.83958	1.40766	1.37541	1.5481	1.36491	1.37813	1.51934	1.98135	1.86688	1.58588	1.9623	1.80319	1.26656	1.80124	1.44372	1.4208	-0.380442	0.00806736	-0.357518	0.0115479		-0.695736	0.000404412	-0.159111	0.0228727		-0.395464	0.000405063	-0.114465	0.122071
2.31148	2.41028	2.39944	2.60776	2.2103	2.26329	2.54954	2.87658	2.74964	2.02959	2.23319	2.10837	2.28227	2.60257	2.55882	2.80155	2.81639	2.79034	1.82218	1.98697	2.14076	1.71566	1.31479	1.58133	2.40444	2.71048	2.61349	2.37374	2.36045	2.72525	2.12372	2.48122	2.80276	1.98331	1.53726	2.57614	0.592831	0.0078138	-0.446045	0.0288391		0.67904	0.000543175	0.357499	0.0388785		0.351518	0.0137147	-0.0132867	0.950992
-0.894931	-1.13665	-0.899164	-1.14165	-1.50541	-1.13201	-2.14068	-1.91501	-1.31583	-0.913448	-1.27498	-0.978876	-1.05287	-1.00162	-1.13948	-1.23177	-1.3459	-1.31875	-0.980902	-1.1134	-1.28922	-1.86618	-1.88609	-1.5598	-1.5435	-1.19239	-1.83737	-0.976916	-1.25969	-1.79051	-1.05577	-1.06465	-1.29881	-1.12784	-1.77069	-1.52442	-0.396581	0.0733772	-0.64285	0.00850479		-0.243038	0.0469144	-0.0088853	0.964645		-0.813589	0.0185201	-0.282773	0.123012
-0.978433	-1.15154	-1.38198	-1.43201	-1.51876	-1.3682	-1.1335	-1.33446	-1.14582	-1.53551	-1.79319	-1.6789	-1.89622	-2.08096	-1.86158	-1.24373	-1.12494	-1.12734	-1.40392	-1.71922	-1.40276	-0.949667	-0.493812	-0.557387	-0.962686	-1.5361	-1.00851	-1.17065	-1.43966	-1.20459	-1.6692	-1.94626	-1.16534	-1.50863	-0.666955	-1.1691	0.339534	0.11453	0.841678	0.00806964		0.503863	0.00246951	-0.277056	0.0497343		-0.0339421	0.891313	-0.269005	0.0974676
1.03801	1.10009	1.08723	0.361819	0.281569	0.272937	-0.503549	-0.468094	-0.495878	0.788591	0.758238	0.591036	-0.247981	-0.306089	-0.20912	-0.538491	-0.456364	-0.54592	0.11291	0.0489552	0.105124	0.401288	0.412943	0.441086	-0.00583196	-0.0279338	-0.153837	1.07511	0.305442	-0.489173	0.712622	-0.254397	-0.513592	0.0889963	0.418439	-0.0625342	-0.151531	0.0227125	0.329443	0		-1.22621	0.00035313	-0.967018	0.00404372		-1.56428	0	-0.769667	0.00282353
-2.09264	-1.74651	-1.69929	-1.3326	-1.37853	-1.63501	-1.91549	-1.65308	-1.72302	-2.0902	-2.06732	-1.72816	-1.1733	-1.27617	-1.50387	-1.79723	-1.78869	-1.82119	-1.69864	-1.42522	-1.44622	-0.582083	-0.478921	-0.537868	-1.4933	-1.40535	-1.28633	-1.84614	-1.44871	-1.76386	-1.96189	-1.31778	-1.80237	-1.52336	-0.532957	-1.39499	0.128366	0.214949	0.990402	0.00141573		0.159524	0.138325	0.644109	0.0183348		0.0822797	0.691196	0.397433	0.0684564
0.896248	1.10226	0.987313	1.29115	1.26948	1.23147	1.41435	1.19569	1.22803	1.20833	1.25878	1.2707	1.4717	1.25413	1.34649	1.2224	1.19595	1.19168	1.16637	1.21255	1.05064	0.910311	0.829497	0.720695	0.672913	0.882477	0.82133	0.995273	1.26403	1.27936	1.24594	1.35744	1.20335	1.14318	0.820167	0.79224	-0.350944	0.00869848	-0.323016	0.0100791		-0.0425897	0.0537463	0.111506	0.149648		0.284084	0.0186509	0.26876	0.0209038
0.536175	0.45345	0.465023	0.82527	0.886237	0.815118	1.20223	1.18265	1.18879	0.330629	0.32465	0.316226	0.834514	0.836482	0.934545	1.42527	1.38342	1.38428	0.234956	0.199079	0.268224	0.714258	0.632864	0.487057	0.820039	0.712442	0.698193	0.484883	0.842208	1.19122	0.323835	0.868514	1.39766	0.234086	0.611393	0.743558	0.509472	0.000606796	0.377307	0.00658712		1.07383	0	0.544679	0.00185075		0.706342	0	0.357325	0.0055015
-2.03138	-2.18496	-1.72786	-1.43061	-1.88853	-1.91113	-1.76864	-1.77032	-1.80136	-1.57899	-1.61029	-1.35964	-1.4414	-1.32124	-1.18506	-1.27442	-1.65264	-1.31668	-1.20137	-1.60588	-1.5905	-0.95929	-0.944329	-1.10817	-1.4944	-1.6622	-1.46454	-1.9814	-1.74342	-1.7801	-1.51631	-1.3159	-1.41458	-1.46592	-1.00393	-1.54038	-0.0744614	0.727751	0.46199	0.022784		0.101729	0.527956	0.200409	0.124778		0.201294	0.128848	0.237975	0.320458
-1.12807	-1.01337	-1.00611	-1.09409	-1.12899	-1.01755	-1.23896	-1.34712	-1.11078	-0.926964	-0.820761	-0.9339	-0.895638	-0.993949	-1.05807	-0.993822	-1.04363	-0.955605	-0.815793	-0.889749	-0.893928	-1.06948	-0.925943	-1.05282	-1.05998	-1.10855	-1.03674	-1.04918	-1.08021	-1.23229	-0.893875	-0.982553	-0.997687	-0.86649	-1.01608	-1.06842	-0.201932	0.00364318	-0.149591	0.0322468		-0.103813	0.0355506	-0.0886786	0.197109		-0.183108	0.0438211	-0.0310295	0.656183
-0.591794	-0.860951	-1.22679	-0.858498	-0.977617	-0.771882	-0.0050199	-0.0654743	-0.0378563	-0.730845	-0.795889	-1.00841	-0.840699	-0.720734	-0.851229	0.0208473	0.11156	0.0437775	-1.94853	-1.83714	-1.93757	-0.547794	-0.643525	-0.435065	-0.82955	-0.75928	-0.590178	-0.893179	-0.869332	-0.0361168	-0.845049	-0.804221	0.0587282	-1.90775	-0.542128	-0.726336	1.18141	0.0010142	1.36562	0		0.903777	0.000726183	0.040828	0.770004		0.857062	0.00626783	0.0238467	0.942357
-1.93814	-2.34085	-1.78802	-1.53136	-1.1688	-1.80063	-1.46318	-1.48451	-1.26763	-1.82413	-2.20522	-1.57457	-1.42651	-1.5278	-1.56251	-1.77573	-1.41376	-1.48585	-1.6487	-1.88263	-1.49189	-1.17113	-1.34124	-1.04543	-1.42483	-1.3295	-1.33537	-2.02234	-1.50026	-1.40511	-1.86797	-1.50561	-1.55844	-1.67441	-1.18593	-1.36324	0.311171	0.0320625	0.488473	0.0192104		0.309529	0.118107	0.362366	0.114993		0.617229	0.014644	0.522074	0.101495
-3.19453	-2.51587	-2.54601	-2.15389	-2.09481	-1.86067	-1.56819	-1.64779	-1.40681	-2.42985	-2.09211	-2.46231	-2.48144	-2.09689	-2.14012	-1.68641	-1.72261	-1.81937	-2.41233	-2.34069	-2.42119	-3.12854	-2.5241	-3.30664	-2.4767	-2.85534	-2.96785	-2.75213	-2.03646	-1.54093	-2.32809	-2.23948	-1.7428	-2.3914	-2.98643	-2.76663	-0.375227	0.0377469	-0.595022	0.0469934		0.585294	0.00507836	0.0886095	0.712251		1.2112	0.00433642	0.715674	0.0461012
-0.144912	-0.654296	-0.754511	-0.974022	-1.15233	-0.771236	-0.272567	-0.195689	-0.559323	-1.21788	-0.365658	-1.61397	-1.55762	-2.1092	-2.79456	-0.616429	-0.593707	-0.796684	-0.841799	-1.40331	-0.979188	-1.68758	-1.58014	-2.01037	-1.18504	-1.19934	-1.11772	-0.517906	-0.965864	-0.342526	-1.06584	-2.15379	-0.66894	-1.07477	-1.75936	-1.16737	-0.0926022	0.702575	-0.684599	0.0235289		0.396896	0.236254	-1.08796	0.093015		0.17538	0.445869	-0.447958	0.108631
1.88238	2.11598	2.2836	2.34921	2.65399	2.91482	2.64259	2.65274	2.90009	3.02896	2.93283	3.18702	3.24004	3.42391	3.20141	3.33554	3.18756	3.12641	3.29425	3.16604	3.23752	3.31328	3.50191	3.066	3.05183	2.77518	2.76191	2.09399	2.63934	2.73181	3.0496	3.28845	3.2165	3.2326	3.29373	2.86298	-0.369628	0.0141737	0.0611272	0.751067		0.166902	0.0766859	0.23885	0.0724926		0.63782	0.00724368	0.545356	0.0594348
0.348305	0.310068	0.34724	0.357481	0.253989	0.252465	0.0470517	0.177358	0.157095	0.437566	0.337821	0.540107	0.328152	0.482793	0.387689	0.232066	0.249966	0.239764	0.699106	0.631831	0.701021	0.488441	0.572904	0.455153	0.244749	0.272278	0.278912	0.335204	0.287978	0.127168	0.438498	0.399545	0.240599	0.677319	0.505499	0.265313	-0.412006	0.000637532	-0.17182	0.0119157		-0.197899	0.0121432	-0.0389532	0.707642		-0.208036	0.00524468	-0.047226	0.272714
-3.00933	-2.82672	-2.87329	-2.30453	-2.53235	-2.03869	-1.73828	-1.08726	-1.27674	-2.68285	-2.72027	-2.11507	-2.06905	-1.52426	-1.7275	-2.15806	-2.09063	-1.68587	-1.35844	-1.63547	-0.983401	-0.806008	-0.663861	-0.563521	-1.03308	-0.852058	-1.16157	-2.90311	-2.29185	-1.36742	-2.50606	-1.7736	-1.97819	-1.32577	-0.677796	-1.01557	0.310201	0.136232	0.647972	0.023637		0.527877	0.0431356	0.732459	0.0440806		1.53569	0.00169231	0.611256	0.0246299
-1.21312	-1.0307	-1.19426	-1.12201	-1.17032	-1.02429	-0.296593	-0.325253	-0.652413	-0.939217	-0.814129	-0.890798	-0.803044	-0.86408	-0.97331	-0.0117836	0.0388384	-0.10273	-1.36472	-1.30024	-1.27346	-2.35948	-2.16997	-2.23745	-0.54519	-0.375219	-0.452554	-1.14603	-1.10554	-0.424753	-0.881382	-0.880144	-0.0252252	-1.31281	-2.25563	-0.457654	0.855153	0.000822757	-0.942824	0		0.856156	0.000259128	0.00123715	0.990146		0.721274	0.00336715	0.0404871	0.686289
0.101903	0.0282815	0.312845	0.394314	0.081244	0.302976	1.9537	2.13008	1.96503	0.538664	0.520613	0.523255	0.54181	0.557283	0.504234	2.08655	2.08344	1.95056	0.318805	0.335744	0.263195	-0.025594	-0.0174928	-0.088233	1.49677	1.72796	1.54152	0.147677	0.259511	2.01627	0.527511	0.534442	2.04018	0.305915	-0.0437733	1.58875	1.28283	0.000694678	-0.349688	0.00110373		1.51267	0.000685714	0.00693154	0.784453		1.86859	0	0.111835	0.460137
-1.58928	-1.5434	-1.68215	-1.81586	-1.74212	-1.52945	-2.06688	-2.57832	-2.32285	-1.88686	-2.17061	-1.95324	-1.67433	-2.39145	-1.81249	-2.24187	-1.88766	-2.03827	-1.73791	-1.72023	-1.97157	-1.38711	-1.84764	-2.12213	-2.3293	-2.1056	-1.96133	-1.60494	-1.69581	-2.32268	-2.00357	-1.95942	-2.05594	-1.80991	-1.78563	-2.13208	-0.322172	0.040869	0.0242772	0.953548		-0.0523658	0.830607	0.0441452	0.912975		-0.71774	0.00617898	-0.0908633	0.41926
3.06615	3.05803	3.06115	3.04243	3.15987	3.08073	2.80087	2.82917	2.7977	3.10867	3.0761	3.13669	3.0795	2.96822	3.0325	2.82782	2.79401	2.89716	3.05516	3.02712	2.96676	2.7627	2.77189	2.77771	2.70075	2.72685	2.88069	3.06178	3.09434	2.80925	3.10715	3.02674	2.83966	3.01634	2.77077	2.76943	-0.246914	0.0112379	-0.245579	0.00165854		-0.267492	0.00133617	-0.0804152	0.0859582		-0.252527	0	0.0325663	0.428348
0.252231	0.351569	0.280038	0.407389	0.300397	0.417773	0.680384	0.689659	0.770392	0.244397	0.314708	0.439873	0.429316	0.526822	0.240171	0.833166	0.743445	0.776373	0.303519	0.409497	0.411978	-0.0496051	-0.00674677	0.0597081	0.641505	0.673999	0.607427	0.294613	0.375186	0.713478	0.332993	0.39877	0.784328	0.374998	0.00111874	0.640977	0.265978	0.00315726	-0.37388	0.00241154		0.451335	0.00148811	0.0657771	0.620167		0.418866	0.000705696	0.0805733	0.16429
-0.367738	-0.589959	-0.543667	-0.791772	-0.462246	-0.694442	-0.323611	-0.376796	-0.102746	-0.195073	-0.207711	-0.272566	-0.769056	-0.56985	-0.82168	-0.508965	-0.512223	-0.436599	-0.254045	-0.433852	-0.475095	-0.94622	-0.762383	-1.0287	-0.622739	-0.36439	-0.402689	-0.500455	-0.649487	-0.267717	-0.225117	-0.720195	-0.485929	-0.387664	-0.912435	-0.463273	-0.0756087	0.535141	-0.524771	0.00743349		-0.260812	0.00142301	-0.495079	0.00773727		0.232737	0.0529432	-0.149032	0.281515
0.00125146	-0.142861	-0.19146	-0.539645	-0.414275	-0.354179	-0.168334	-0.209381	-0.1373	-0.67615	-0.707641	-0.751372	-0.89603	-1.10176	-1.00108	-0.585956	-0.479198	-0.460702	-0.916941	-0.935115	-1.08902	-0.673538	-0.603324	-0.61835	-0.384206	-0.380518	-0.207885	-0.111023	-0.436033	-0.171672	-0.711721	-0.999624	-0.508618	-0.980359	-0.631737	-0.324203	0.656156	0.00171429	0.348622	0.00589078		0.203103	0.00545946	-0.287903	0.0158635		-0.0606483	0.3059	-0.32501	0.0238419
-1.55503	-1.26211	-1.1179	-1.51261	-1.28817	-1.17832	-1.7042	-1.84052	-2.16508	-1.06909	-1.29806	-1.1102	-1.13868	-1.22253	-1.28184	-1.44301	-1.51835	-1.73323	-1.94803	-1.89081	-1.95467	-1.59082	-1.26124	-1.52682	-1.50613	-1.84454	-1.91481	-1.31168	-1.32637	-1.90327	-1.15912	-1.21435	-1.56487	-1.93117	-1.45963	-1.75516	0.176013	0.160066	0.471543	0.00886823		-0.405746	0.010167	-0.0552262	0.599038		-0.591588	0.0184012	-0.0146856	0.956436
0.29758	0.340836	0.230393	0.476594	0.376703	0.308919	0.47113	0.35519	0.406599	0.484864	0.432165	0.3374	0.446603	0.411695	0.253516	0.2035	0.154033	0.0731201	0.647282	0.605174	0.264207	0.485202	0.317666	0.39521	0.238185	0.175572	0.321212	0.289603	0.387406	0.410973	0.418143	0.370605	0.143551	0.505554	0.399359	0.24499	-0.260565	0.0639706	-0.106195	0.488184		-0.274592	0.0046944	-0.0475385	0.619328		0.12137	0.0315155	0.0978027	0.166504
0.838179	0.886481	0.928989	1.09648	0.996645	0.942387	0.69443	0.764119	0.699216	0.771317	0.734725	0.760121	0.895138	0.892013	0.966283	0.433623	0.447248	0.429564	0.772859	0.821977	0.817316	0.371438	0.384136	0.389379	0.81561	1.09258	0.902561	0.88455	1.01184	0.719255	0.755387	0.917811	0.436812	0.804051	0.381651	0.936916	0.132866	0.11512	-0.4224	0		-0.318576	0.000340426	0.162424	0.00763077		-0.165295	0.00573452	0.127288	0.0744129
0.518581	0.541186	0.580855	0.348734	0.214984	0.212455	-0.191756	-0.195654	-0.155613	0.706587	0.679257	0.772613	0.492499	0.33705	0.32588	-0.285398	-0.17188	-0.221332	0.462034	0.51765	0.507951	-0.0103014	0.0319257	0.0664978	-0.452124	-0.129472	-0.213009	0.546874	0.258724	-0.181007	0.719486	0.385143	-0.226203	0.495879	0.029374	-0.264869	-0.760747	0.00202601	-0.466505	0		-0.945689	0.000234146	-0.334343	0.0106585		-0.727881	0	-0.28815	0.0115733
0.175548	0.176821	0.249318	0.305994	0.288549	0.442565	0.416929	0.243407	0.427128	0.317308	0.149429	0.365913	0.200507	0.3667	0.397295	0.292878	0.435421	0.351414	0.0498908	-0.339502	-0.187838	-0.0696785	0.331026	0.13348	0.322187	0.219927	0.275524	0.200563	0.345703	0.362488	0.27755	0.321501	0.359904	-0.15915	0.131609	0.272546	0.431696	0.0135347	0.290759	0.109423		0.0823544	0.235995	0.0439508	0.735263		0.161925	0.0348797	0.14514	0.0617164
0.0213325	0.437831	0.104384	0.0168171	0.252433	0.224546	0.369695	0.531554	0.435789	-0.0611041	-0.116919	-0.232658	-0.0970876	-0.0164554	-0.0587089	0.385855	0.334095	0.561175	0.00701213	-0.0332067	0.0160158	-0.398424	0.186361	-0.310595	0.217903	-0.0524209	0.146178	0.187849	0.164599	0.445679	-0.136894	-0.0574173	0.427042	-0.00339293	-0.174219	0.103887	0.10728	0.180643	-0.170826	0.40609		0.563935	0.00202224	0.0794763	0.21246		0.25783	0.0741428	-0.0232503	0.925574
0.159345	0.167113	0.141888	0.385839	0.229202	0.441819	0.413226	0.199101	0.571318	0.174059	0.164101	0.193613	-0.113728	-0.203233	0.0477574	0.0824318	0.112332	0.376395	0.973747	0.979188	1.10974	0.463662	0.291096	0.482854	0.720115	0.544669	0.604328	0.156116	0.352287	0.394549	0.177258	-0.0897346	0.190386	1.02089	0.412537	0.623037	-0.397854	0.00437173	-0.608354	0.00246027		0.0131288	0.947083	-0.266992	0.025852		0.238433	0.0502845	0.196171	0.0441485
1.06744	0.935426	0.999989	1.02031	0.999788	1.11872	1.6306	1.49899	1.513	1.32985	1.29107	1.23527	1.06326	1.20478	1.38279	1.59264	1.49813	1.57355	1.1314	1.25921	1.22789	1.25745	1.33519	1.13728	1.62967	1.43741	1.51672	1.00095	1.04627	1.54753	1.2854	1.21694	1.55477	1.20616	1.24331	1.52793	0.321771	0.00736776	0.0371448	0.699266		0.269377	0.00176346	-0.0684564	0.572861		0.546575	0.00099562	0.0453185	0.479908
-0.0486352	-0.035135	-0.0121062	0.193712	0.115873	0.299656	0.213862	0.358379	0.413488	0.0303934	-0.00494814	-0.108203	0.214438	0.281379	0.256259	0.227484	0.180101	0.220385	0.140885	0.175737	0.162033	0.291918	-0.0446124	0.228925	0.717172	0.614745	0.670394	-0.0319588	0.20308	0.328576	-0.027586	0.250692	0.209323	0.159552	0.158743	0.667437	0.507886	0.000616915	-0.00080808	0.9966		0.236909	0.0035082	0.278278	0.00798411		0.360535	0.00287122	0.235039	0.0209418
-1.32818	-1.37848	-1.49598	-1.42337	-1.51715	-1.56778	-1.28526	-1.14725	-1.21888	-1.41322	-1.45371	-1.24989	-1.33693	-1.6621	-1.4467	-1.08542	-1.33323	-0.962503	-1.38185	-1.48218	-1.3272	-1.75663	-1.5321	-1.69773	-1.27254	-1.24107	-1.22626	-1.40088	-1.50277	-1.21713	-1.37228	-1.48191	-1.12705	-1.39708	-1.66215	-1.24662	0.150455	0.0199308	-0.265077	0.0225175		0.245226	0.0565291	-0.109633	0.398926		0.183755	0.0239434	-0.101884	0.19107
1.04994	0.952244	0.862618	0.986487	0.930671	0.957234	1.40311	1.44106	1.47002	0.907422	0.987852	0.902922	0.832491	1.03468	0.751071	1.47685	1.42906	1.45186	1.37921	1.40844	1.35822	1.17561	1.19001	1.01472	1.46939	1.39012	1.50315	0.954935	0.958131	1.43806	0.932732	0.872747	1.45259	1.38196	1.12678	1.45422	0.0722628	0.0681533	-0.255181	0.0102339		0.51986	0.000307263	-0.0599849	0.598399		0.483128	0.0013939	0.00319537	0.972367
0.120974	0.161566	0.159669	0.332587	0.260642	0.248244	0.725736	0.65999	0.629705	0.489782	0.516457	0.395722	0.517757	0.549504	0.593681	0.918517	0.941118	0.86241	0.147983	0.21474	0.124618	0.0343573	0.115914	0.225261	0.675925	0.676427	0.729403	0.147403	0.280491	0.67181	0.46732	0.553647	0.907348	0.162447	0.125178	0.693918	0.531471	0.000635897	-0.0372693	0.645827		0.440028	0.000714202	0.0863272	0.104447		0.524408	0.000242187	0.133088	0.0190102
2.05778	2.24364	2.11925	2.31162	2.26278	2.15892	2.13098	2.07862	2.05278	2.16496	2.19242	2.06838	2.26421	2.07529	2.30505	2.04424	2.10319	1.98474	1.84673	2.05461	1.90224	2.27126	2.03209	2.13624	2.24976	2.28951	2.24209	2.14022	2.24444	2.08746	2.14192	2.21485	2.04406	1.93453	2.14653	2.26045	0.325926	0.00617771	0.212001	0.060062		-0.0978608	0.058497	0.0729328	0.429938		-0.0527649	0.371086	0.104216	0.213859
0.136386	0.220272	0.232633	0.0844517	0.14622	0.0654254	0.185231	0.0788786	0.0233815	-0.0929301	-0.324222	-0.215505	-0.351974	-0.409114	-0.351742	-0.627089	-0.488782	-0.698801	-0.293988	-0.0531504	-0.0831106	-0.145715	-0.227683	-0.2154	-0.119299	-0.013376	-0.163141	0.19643	0.0986991	0.0958305	-0.210886	-0.370943	-0.604891	-0.143416	-0.196266	-0.0986052	0.0448112	0.727855	-0.0528495	0.602752		-0.394005	0.00615178	-0.160058	0.0772363		-0.1006	0.085207	-0.0977312	0.0701869
-0.0640867	-0.104864	-0.509577	-1.41458	-1.19247	-1.39291	-1.22421	-1.5919	-1.73029	-0.792033	-0.986781	-1.06971	-1.69534	-1.98726	-1.82357	-1.57583	-1.39821	-1.77023	-1.9363	-1.88646	-2.11099	-2.25275	-1.95612	-1.69367	-2.40436	-2.38211	-2.30273	-0.226176	-1.33332	-1.51547	-0.949508	-1.83539	-1.58142	-1.97792	-1.96751	-2.36307	-0.385151	0.00593328	0.0104059	0.975058		-0.631915	0.00512803	-0.885883	0.00458131		-1.28929	0.00262532	-1.10714	0.00911905
1.31683	1.17389	1.26847	1.32663	1.4142	1.17043	1.27919	1.44725	1.41307	0.980454	0.879919	0.879061	1.09275	0.925855	0.925786	1.16113	1.19629	1.17741	0.740016	0.794533	0.868547	0.917539	1.11613	0.703484	1.05256	1.21112	1.15834	1.25306	1.30375	1.37983	0.913145	0.981463	1.17828	0.801032	0.912386	1.14068	0.339643	0.00479798	0.111353	0.43355		0.265131	0.00141463	0.068318	0.351104		0.126772	0.0729708	0.0506918	0.650333
-0.612121	-0.709719	-0.734217	-1.20709	-1.32276	-0.75561	-0.624343	-1.8179	-1.59904	-0.338076	-0.137103	-0.147534	-0.220054	-0.474233	-0.366316	-1.06293	-1.06073	-1.03223	-0.482325	-0.58348	-0.447382	-0.948367	-0.281139	-0.73438	-0.889218	-0.881454	-1.00556	-0.685352	-1.09515	-1.34709	-0.207571	-0.353535	-1.05196	-0.504396	-0.654629	-0.92541	-0.421014	0.00246367	-0.150233	0.537089		-0.844393	0.000294269	-0.145964	0.197318		-0.661742	0.0839188	-0.409801	0.0835254
-0.073241	-0.0997598	-0.394205	-0.0428581	-0.140453	0.0331392	-0.367666	-0.276974	-0.449185	-0.294952	-0.251749	-0.200505	0.173144	0.212641	0.136072	0.0282435	-0.21198	-0.0153747	0.433997	0.216435	0.30637	0.696215	0.762508	0.794436	-0.0944464	-0.308629	-0.0160418	-0.189069	-0.0500574	-0.364608	-0.249069	0.173952	-0.0663703	0.318934	0.751053	-0.139706	-0.45864	0.00954159	0.432119	0.00551823		0.182698	0.0358145	0.423021	0.00375082		-0.17554	0.12098	0.139011	0.296457
1.19905	1.19941	1.20925	1.13439	0.995039	1.04969	1.08172	1.08651	1.13549	1.23805	1.25106	1.36028	1.09035	1.02447	0.910152	1.18475	1.20467	1.23044	1.29417	1.23864	1.26193	1.28114	1.36212	1.18173	1.14581	1.02097	1.10867	1.20257	1.05971	1.10124	1.28313	1.00832	1.20662	1.26491	1.275	1.09182	-0.173093	0.0094925	0.0100849	0.913826		-0.076509	0.0634851	-0.274805	0.0185272		-0.101334	0.00310415	-0.142866	0.0327878
-0.422938	-0.340629	-0.427908	-1.1199	-1.07109	-1.13125	-0.434988	-0.440824	-0.411873	0.0432703	0.100603	0.158266	-1.05523	-1.20869	-1.31415	-0.456872	-0.39088	-0.418665	-0.400581	-0.379491	-0.446589	-0.923564	-0.629781	-0.969136	-0.689183	-0.602688	-0.654601	-0.397158	-1.10741	-0.429229	0.100713	-1.19269	-0.422139	-0.408887	-0.840827	-0.648824	-0.239937	0.00246517	-0.43194	0.0130428		-0.522852	0.000327619	-1.2934	0.00235616		-0.0320703	0.254235	-0.710256	0.00417778
0.0150425	0.071687	-0.0730164	0.032877	-0.0642591	0.168653	0.0594423	0.0361373	0.0488298	-0.294493	-0.287887	-0.192545	-0.0486281	-0.100338	-0.0317843	-0.0159001	-0.0429854	0.13301	-0.168864	-0.0759451	-0.129714	0.159424	0.335477	0.0560617	-0.158266	-0.226998	-0.125811	0.00457104	0.045757	0.0481365	-0.258308	-0.0602502	0.0247083	-0.124841	0.183654	-0.170358	-0.045517	0.245556	0.308495	0.0167214		0.283016	0.00583211	0.198058	0.0131278		0.0435654	0.286099	0.0411859	0.713449
-0.94951	-1.40421	-1.76537	-2.46939	-1.2257	-2.49882	-2.06451	-0.900891	-0.805553	-1.74294	-2.15399	-1.74666	-4.23071	-1.76305	-1.55235	-1.37	-2.31859	-2.69706	-1.79355	-1.66289	-1.64931	-1.93297	-1.45761	-1.21136	-1.24363	-1.44819	-1.68237	-1.37303	-2.06464	-1.25698	-1.8812	-2.51537	-2.12855	-1.70191	-1.53398	-1.45807	0.243848	0.0848512	0.167935	0.515611		-0.24735	0.667828	-0.63417	0.559052		0.116049	0.894196	-0.691605	0.223951
-0.0122764	-0.0336506	-0.0360796	-0.238211	0.0723715	-0.0325336	0.158895	0.477087	0.179788	0.28436	0.283194	-0.0948164	0.158141	0.239027	0.214194	0.539125	0.306177	0.40939	-0.284025	-0.0651805	-0.109768	-0.766845	-0.405908	-0.42561	0.323763	0.217618	0.329807	-0.0273356	-0.0661243	0.271923	0.157579	0.203787	0.418231	-0.152991	-0.532787	0.290396	0.443388	0.00441427	-0.379796	0.0339725		0.260652	0.0675688	0.0462081	0.817636		0.299259	0.0236562	-0.0387887	0.776609
-1.97646	-3.55198	-2.35438	-3.54527	-3.52907	-2.4	-4.33142	-2.84806	-3.8992	-4.39	-3.75456	-3.47935	-4.7336	-3.9718	-5.10372	-3.33319	-4.50746	-4.01109	-5.00203	-4.99603	-4.25163	-5.14881	-4.55633	-4.32163	-5.02664	-4.39674	-4.17677	-2.62761	-3.15811	-3.6929	-3.87463	-4.60304	-3.95058	-4.74989	-4.67559	-4.53338	0.216509	0.643292	0.0743049	0.900102		-0.0759466	0.934844	-0.728407	0.148553		-1.06529	0.103579	-0.530504	0.468906
0.0242136	0.421939	0.438011	-0.0461721	0.183606	-0.00403309	-0.394009	-0.400754	-0.541097	-0.734508	0.030622	0.191104	0.113357	-0.0777786	-0.257827	-0.188858	-0.212853	-0.359412	-0.0440609	0.121213	-0.148908	-0.000262976	-0.221668	-0.25262	-0.502354	-0.66854	-0.518174	0.294721	0.0444668	-0.445287	-0.170927	-0.0740828	-0.253707	-0.0239185	-0.158184	-0.563023	-0.539104	0.00478788	-0.134265	0.263986		-0.08278	0.886248	0.0968446	0.840835		-0.740008	0.00450968	-0.250254	0.174479
2.25273	2.18881	2.26223	1.8398	1.9323	1.92918	1.76968	1.74287	1.75018	2.31091	2.27991	2.32818	1.79462	1.77291	1.72966	1.7316	1.66976	1.76397	2.22035	2.20671	2.18679	1.90169	2.07561	1.9019	1.82879	1.76765	1.73055	2.23459	1.90043	1.75424	2.30633	1.76573	1.72178	2.20462	1.95973	1.77566	-0.428956	0.000905797	-0.244886	0.0116084		-0.584553	0.000380623	-0.540602	0.00604878		-0.480344	0	-0.334161	0.00490249
-1.28481	-1.29138	-1.2628	-1.09928	-1.14191	-1.17561	-1.40739	-1.35324	-1.34406	-1.44363	-1.39352	-1.49188	-1.23595	-1.15568	-1.31549	-1.6215	-1.58097	-1.5239	-1.27823	-1.13988	-1.19038	-1.18571	-1.37393	-1.24017	-1.2822	-1.23118	-1.36328	-1.27966	-1.13893	-1.36823	-1.44301	-1.23571	-1.57545	-1.20283	-1.2666	-1.29222	-0.0893889	0.114423	-0.0637717	0.412736		-0.132445	0.0129529	0.207304	0.0225555		-0.0885666	0.00925576	0.140731	0.0115528
-0.107993	-0.13286	0.0502841	-0.211638	-0.204839	-0.0774655	0.530783	0.64152	0.535523	-0.0507019	-0.0318193	-0.00251555	-0.11355	0.00664258	-0.235537	0.698182	0.776726	0.749497	0.472107	0.359723	0.539572	0.285686	0.200328	0.10365	0.820724	0.849526	0.858146	-0.0635229	-0.164648	0.569275	-0.0283456	-0.114148	0.741468	0.457134	0.196555	0.842798	0.385664	0.0025831	-0.260579	0.0181027		0.769814	0.000428571	-0.0858025	0.284491		0.632798	0.00117175	-0.101125	0.233162
-0.962919	-1.05766	-0.859273	-0.758195	-0.772881	-0.866937	-0.240488	-0.229748	-0.223338	-0.691235	-0.770525	-0.778646	-0.763915	-0.760289	-0.756662	-0.247134	-0.251817	-0.342379	-0.709953	-0.560123	-0.628858	-1.10696	-1.05431	-1.09616	-0.184263	-0.184128	-0.195399	-0.959951	-0.799338	-0.231191	-0.746802	-0.760289	-0.280443	-0.632978	-1.08581	-0.18793	0.445048	0.00102545	-0.452833	0.0015122		0.466359	0.00061413	-0.0134868	0.739735		0.728759	0.000390805	0.160613	0.0765866
-0.620456	-0.660405	-0.532631	-0.979067	-1.17406	-1.07207	-1.34666	-1.15783	-1.13111	-0.382278	-0.547456	-0.600511	-1.11709	-1.13535	-0.971096	-1.15214	-1.08307	-1.23875	-1.39312	-1.05533	-1.13451	-0.828163	-0.920014	-0.67477	-1.05239	-1.16975	-1.13423	-0.604498	-1.07507	-1.21187	-0.510082	-1.07451	-1.15799	-1.19432	-0.807649	-1.11879	0.0755324	0.552944	0.386672	0.0257116		-0.647906	0.00111869	-0.564433	0.00647871		-0.607371	0.00151405	-0.470568	0.00910329
3.1283	2.93203	2.87843	2.59252	2.66886	2.70334	2.71894	2.87491	2.71823	2.35097	2.34415	2.25435	2.24073	2.39261	2.14622	2.56311	2.55735	2.55082	2.03726	2.04424	1.92064	2.34927	2.47206	2.34623	2.38644	1.95553	2.22516	2.97959	2.65491	2.77069	2.31649	2.25985	2.5571	2.00072	2.38919	2.18904	0.188327	0.14828	0.38847	0.00402657		0.240606	0.00125064	-0.0566372	0.561856		-0.208892	0.046611	-0.324681	0.0254326
-1.96859	-2.03298	-1.80597	-1.62468	-1.56228	-1.61745	-1.48269	-1.60141	-1.65912	-2.3208	-2.41226	-2.41543	-1.7769	-1.74066	-1.52746	-1.71385	-1.7756	-2.01701	-2.50555	-2.31984	-2.33088	-1.73104	-2.00766	-1.36782	-1.54938	-1.48322	-1.51283	-1.93584	-1.60147	-1.58108	-2.38283	-1.68167	-1.83549	-2.38542	-1.70217	-1.51514	0.870278	0.000846024	0.683249	0.0180969		0.547339	0.00283728	0.701156	0.00450142		0.354767	0.00874419	0.334375	0.0172276
0.50613	0.593286	0.585452	0.739248	0.774648	0.772855	0.458882	0.438189	0.396742	0.213676	0.11639	0.20863	0.555938	0.388653	0.562365	0.207073	0.110789	0.110412	0.512985	0.566909	0.542279	0.622402	0.628361	0.764364	0.616064	0.451688	0.472542	0.561623	0.76225	0.431271	0.179565	0.502318	0.142758	0.540724	0.671709	0.513431	-0.0272928	0.731437	0.130985	0.0392659		-0.0368074	0.407344	0.322753	0.0136921		-0.130352	0.010514	0.200628	0.00974304
-1.52691	-2.33237	-1.02264	-2.3479	-1.42206	-1.62226	-1.5331	-0.804311	-1.32994	-2.09352	-1.56496	-2.26244	-2.25311	-2.07568	-3.4043	-2.46542	-2.68083	-1.92816	-1.42525	-1.29541	-1.85724	-1.72122	-2.82268	-2.10353	-1.29256	-1.91484	-1.57071	-1.62731	-1.7974	-1.22245	-1.97364	-2.5777	-2.35814	-1.52597	-2.21581	-1.59271	-0.0667388	0.882386	-0.689844	0.0971495		-0.384502	0.166121	-0.604057	0.251858		0.40486	0.346733	-0.170095	0.815327
-1.27277	-1.40876	-1.04528	-1.0325	-0.920128	-0.921474	-0.91665	-0.770139	-0.707652	-1.30073	-1.42728	-1.28989	-1.21014	-1.10761	-1.07989	-0.67699	-0.753097	-0.574474	-1.07651	-1.37597	-1.07175	-0.911415	-0.970556	-1.08467	-0.936436	-1.19766	-0.902456	-1.24227	-0.958035	-0.798147	-1.3393	-1.13255	-0.668187	-1.17474	-0.988882	-1.01218	0.162561	0.22317	0.185863	0.134487		0.671112	0.00068552	0.206749	0.0287864		0.444125	0.0127972	0.284237	0.0695716
-1.93845	-1.68713	-1.72837	-2.59204	-2.31893	-2.70635	-1.48183	-1.95027	-1.4872	-1.26491	-1.44238	-1.34602	-1.95357	-1.9355	-1.90961	-1.2294	-1.31304	-1.3181	-2.20325	-2.09996	-1.97392	-1.19076	-1.02848	-0.98964	-1.23028	-0.791591	-1.43576	-1.78465	-2.53911	-1.63977	-1.3511	-1.93289	-1.28685	-2.09237	-1.06962	-1.15254	0.939831	0.00756399	1.02275	0.00113191		0.0642567	0.221903	-0.58179	0.00361804		0.144884	0.415338	-0.754459	0.0128638
0.789736	0.732725	0.730665	0.863381	0.863901	0.902411	0.789497	0.819404	0.89053	0.716	0.78957	0.835963	0.901672	0.935746	0.77057	0.829947	0.871406	0.845863	1.01059	0.967507	0.962991	0.991974	1.05302	0.948164	0.801691	0.744519	0.791047	0.751042	0.876565	0.833144	0.780511	0.869329	0.849072	0.980364	0.997718	0.779086	-0.201279	0.00178723	0.0173535	0.718641		0.0685608	0.0643999	0.0888182	0.206113		0.0821018	0.0449182	0.125523	0.0131433
-1.02239	-0.725394	-0.863935	-1.72669	-1.35623	-0.759421	-0.402276	-0.374674	-0.191009	-0.496444	-1.06476	-0.70104	-0.722512	-0.714754	-0.807927	-0.0992742	-0.0508151	0.0628777	-1.44781	-1.0155	-1.52348	-1.14309	-1.25772	-1.02288	-0.301564	-0.540307	-0.613283	-0.870572	-1.28078	-0.322653	-0.754082	-0.748398	-0.0290705	-1.32893	-1.14123	-0.485051	0.843878	0.00794723	0.187702	0.314684		0.725011	0.00669853	0.00568398	0.983788		0.547919	0.005	-0.410206	0.235956
-0.28994	-0.252073	-0.0780771	0.282492	0.255052	0.189753	0.467239	0.423245	0.439245	0.358157	0.396194	0.337709	0.529629	0.525684	0.568168	0.60885	0.590349	0.595833	0.0391877	0.0727608	0.104635	-0.126889	-0.238867	-0.215615	0.550784	0.652844	0.550643	-0.206697	0.242432	0.443243	0.36402	0.54116	0.598344	0.0721947	-0.19379	0.584757	0.512562	0.000766871	-0.265985	0.00369231		0.234324	0.000303084	0.17714	0.00463186		0.64994	0.000916234	0.449129	0.0105172
-1.03141	-0.771355	-0.912266	-0.855084	-0.9105	-0.95049	-0.958798	-1.05236	-0.974544	-0.801575	-0.959997	-1.0365	-0.836474	-0.825694	-0.559735	-0.857051	-0.723662	-0.822165	-1.12154	-1.04559	-1.06713	-0.596854	-0.755155	-0.357533	-0.328846	-0.414813	-0.548068	-0.90501	-0.905358	-0.995234	-0.93269	-0.740634	-0.800959	-1.07809	-0.569847	-0.430576	0.647512	0.000915825	0.50824	0.0106041		0.131731	0.086016	0.192055	0.151254		-0.0902239	0.23768	-0.000348488	0.998345
0.0579398	-0.351741	-0.171433	-0.044045	-0.149431	-0.0450106	-0.475999	-0.317228	-0.377822	-0.484763	-0.285316	-0.188847	-0.230466	-0.210603	-0.502808	-0.706123	-0.463273	-0.538191	-0.153149	-0.25368	-0.386528	-0.300262	-0.616356	-0.51521	-1.00176	-0.991514	-0.927603	-0.155078	-0.0794956	-0.390349	-0.319642	-0.314626	-0.569196	-0.264452	-0.477276	-0.973625	-0.709173	0.000975785	-0.212824	0.103157		-0.249554	0.0407825	0.00501609	0.981359		-0.235272	0.078826	0.0755823	0.651088
-0.261271	-0.334124	-0.221308	0.193834	0.0433254	0.156743	0.452308	0.591694	0.50109	-1.10129	-1.00927	-1.08867	-0.674376	-0.727968	-0.574167	-0.222105	-0.00282669	-0.252804	-0.518768	-0.62915	-0.580369	-0.471328	-0.424797	-0.213307	0.41254	0.38754	0.213325	-0.272234	0.131301	0.51503	-1.06641	-0.658837	-0.159245	-0.576096	-0.369811	0.337801	0.913897	0.000748503	0.206285	0.051393		0.907167	0.000587776	0.407575	0.00462455		0.787265	0.000390551	0.403535	0.00836735
0.262096	0.734232	0.350464	0.254859	0.0978842	0.20358	-0.0573375	-0.193039	-0.329832	0.297951	0.209883	0.121852	-0.198045	-0.229806	0.184808	-0.913269	-1.29366	-0.827484	0.36035	0.487004	0.237105	0.114879	-0.0542474	0.672461	-0.578049	-1.05253	-0.344695	0.448931	0.185441	-0.193403	0.209895	-0.0810142	-1.01147	0.361486	0.244364	-0.658425	-1.01991	0.00778537	-0.117122	0.721526		-1.22137	0.00115667	-0.29091	0.102289		-0.642334	0.0105945	-0.263489	0.15562
1.02233	0.937601	1.00533	1.0638	1.04448	0.956588	0.896308	0.960411	0.968109	1.2727	1.10657	1.16864	1.22224	1.26029	1.26267	1.00284	0.957244	0.933724	0.865	0.853017	0.904533	1.00168	0.988788	1.07979	1.00916	1.11878	1.08399	0.988421	1.02162	0.941609	1.18264	1.2484	0.964602	0.874183	1.02342	1.07064	0.196459	0.00500966	0.149238	0.00860163		-0.218035	0.0067453	0.0657659	0.247241		-0.0468114	0.158978	0.0332024	0.523088
-1.03282	-0.971012	-1.19442	-0.768384	-0.525952	-0.550256	-0.927768	-0.837073	-0.912392	-1.21934	-1.15534	-0.900584	-0.681101	-0.840979	-0.675026	-0.699725	-0.771898	-0.732122	-1.16624	-1.24082	-1.27022	-0.409805	-0.573386	-0.570616	-0.683715	-0.87631	-0.76278	-1.06609	-0.614864	-0.892411	-1.09175	-0.732369	-0.734582	-1.22576	-0.517936	-0.774268	0.451492	0.00264696	0.707825	0.00114655		0.357173	0.0104279	0.359386	0.0351401		0.173674	0.039914	0.451221	0.0196994
-0.919604	-1.17655	-0.508815	-0.891675	-0.812897	-1.31108	-0.882207	-1.11724	-0.992162	-1.45254	-1.40365	-1.21293	-1.77342	-1.34141	-1.64896	-0.869587	-1.43324	-0.628819	-2.04693	-1.3789	-1.45932	-1.38573	-1.07909	-0.816354	-1.30318	-1.2182	-1.58691	-0.868322	-1.00522	-0.997203	-1.35637	-1.58793	-0.977214	-1.62838	-1.09373	-1.36943	0.258949	0.266058	0.534655	0.0846758		0.379159	0.10471	-0.231556	0.176318		-0.128882	0.630193	-0.136896	0.692791
-0.339307	-0.512444	-0.555299	-0.303618	-0.098978	-0.182798	-0.370198	-0.41338	-0.111511	-0.487003	-0.551827	-0.824884	-0.320097	-0.129295	-0.248217	0.0832839	0.0587921	0.0831685	-0.657164	-0.927743	-0.665742	-0.499744	-0.286549	-0.484744	-0.353556	-0.433097	-0.551171	-0.469016	-0.195131	-0.298363	-0.621238	-0.232536	0.0750815	-0.750216	-0.423679	-0.445941	0.304275	0.0254403	0.326537	0.0312896		0.696319	0.00183076	0.388702	0.0330432		0.170654	0.13125	0.273885	0.0439886
-3.49508	-1.84802	-1.84359	-1.51773	-2.16621	-1.62291	-0.273158	-0.545783	-0.611898	-1.57607	-1.57783	-1.44645	-1.35079	-1.32434	-1.36755	-0.570095	-0.404341	-0.314966	-1.63575	-1.34637	-1.2189	-1.35511	-1.5521	-1.46526	-0.365586	-0.561333	-0.933954	-2.39556	-1.76895	-0.476946	-1.53345	-1.34756	-0.429801	-1.40034	-1.45749	-0.620291	0.780051	0.0126921	-0.0571465	0.779783		1.10365	0.000293265	0.185887	0.0193608		1.91862	0.0147875	0.626612	0.358641
1.23413	1.19809	1.28488	1.34566	1.20964	1.25198	1.47759	1.55181	1.51381	1.43525	1.42229	1.35705	1.29447	1.35939	1.32997	1.62484	1.561	1.54836	1.00827	0.969863	1.05685	0.945401	0.949133	1.04164	1.362	1.36934	1.42751	1.23904	1.26909	1.5144	1.40486	1.32794	1.57807	1.01166	0.978726	1.38628	0.374621	0.00058548	-0.0329366	0.48508		0.173205	0.0040841	-0.0769196	0.0623257		0.275369	0.00143329	0.0300591	0.634384
-1.26775	-1.42029	-1.39452	-1.10128	-1.07923	-1.16011	-1.07905	-0.909209	-1.07365	-1.07912	-1.04924	-0.870279	-0.992165	-0.988369	-0.983797	-0.939193	-0.979169	-0.960165	-1.12777	-1.17749	-1.11168	-1.24509	-1.13221	-1.1473	-1.03421	-1.14135	-1.2322	-1.36086	-1.11354	-1.02063	-0.999547	-0.98811	-0.959509	-1.13898	-1.17487	-1.13592	0.00306153	0.979611	-0.0358877	0.43846		0.0400376	0.653624	0.0114364	0.918754		0.340221	0.00626217	0.247313	0.0177549
-0.501856	-0.457474	-0.546022	-0.484274	-0.473344	-0.543634	-0.116615	-0.132869	-0.210807	-0.670173	-0.590549	-0.456565	-0.601259	-0.533926	-0.626238	0.0884886	0.100685	0.0272021	-0.488341	-0.624926	-0.601119	-0.71179	-0.513337	-0.796326	-0.469664	-0.380413	-0.231438	-0.501784	-0.500418	-0.15343	-0.572429	-0.587141	0.0721253	-0.571462	-0.673818	-0.360505	0.210957	0.0338107	-0.102356	0.314613		0.644554	0.000745687	-0.0147121	0.898132		0.348354	0.00117137	0.00136606	0.980582
1.85147	1.89042	1.78391	2.00149	2.11281	2.04406	1.7137	1.54787	1.74568	1.7981	1.85247	1.73204	2.0943	1.93162	1.96593	1.67947	1.66954	1.67595	1.69467	1.75533	1.6535	1.95341	2.05416	1.86806	1.78394	1.54315	1.73345	1.84194	2.05279	1.66908	1.79421	1.99729	1.67498	1.70117	1.95854	1.68685	-0.0143193	0.925038	0.257376	0.0112977		-0.119221	0.0118139	0.20308	0.0316298		-0.172855	0.0348875	0.21085	0.017453
1.14696	1.17336	1.07741	1.22987	1.14579	1.28409	1.16997	1.05108	1.10199	1.29522	1.06929	1.31477	1.32183	1.48653	1.38241	1.55756	1.39832	1.53718	1.5603	1.64065	1.73282	1.98701	1.85765	2.15223	1.80041	1.71194	1.5808	1.13258	1.21992	1.10768	1.22643	1.39692	1.49769	1.64459	1.99896	1.69772	0.0531277	0.59701	0.354373	0.0167568		0.271257	0.0193206	0.170496	0.125542		-0.0248979	0.694961	0.0873396	0.149399
0.65025	0.348329	0.539681	0.405172	0.523482	0.662115	0.376567	0.375848	0.286445	0.383052	0.335885	0.141834	0.390893	0.537405	0.247734	0.379107	0.202176	0.210423	0.284412	0.207601	0.116503	0.437625	0.73815	0.545949	0.260641	-0.00959516	0.118892	0.512753	0.530256	0.346287	0.286923	0.39201	0.263902	0.202839	0.573908	0.123313	-0.0795259	0.405823	0.37107	0.0151493		-0.0230211	0.903321	0.105087	0.410882		-0.166467	0.0851187	0.017503	0.928643
0.0827796	0.262156	0.26879	0.520193	0.44704	0.500215	1.52136	1.6007	1.46145	0.438573	0.416543	0.387689	0.524615	0.472378	0.700674	1.54298	1.58729	1.53959	0.152768	0.246289	0.232108	0.194481	0.103433	0.263771	1.18701	1.23459	1.23783	0.204575	0.489149	1.52784	0.414268	0.565889	1.55662	0.210388	0.187228	1.21981	1.00942	0	-0.02316	0.778892		1.14235	0	0.15162	0.0899421		1.32326	0	0.284574	0.0198209
0.367251	0.402392	0.308461	0.583612	0.57592	0.619482	0.605191	0.554961	0.470761	0.173594	0.0191679	0.117394	0.405737	0.123752	0.25922	0.318782	0.270227	0.202243	0.00246739	-0.08202	0.0152147	0.282058	0.0986362	0.246654	0.114988	-0.14707	-0.185884	0.359368	0.593005	0.543638	0.103385	0.262903	0.263751	-0.021446	0.209116	-0.0726554	-0.0512094	0.723887	0.230562	0.0165023		0.160365	0.0207556	0.159518	0.14644		0.184269	0.0110895	0.233636	0.00645235
-1.31405	-1.50867	-1.4123	-1.31822	-1.6509	-1.59435	-1.50108	-1.41663	-1.25106	-0.849127	-0.85569	-0.916962	-1.27621	-1.32701	-1.36753	-1.19864	-1.13961	-1.17198	-1.05353	-0.914122	-0.982268	-1.54531	-1.20862	-1.36846	-1.46843	-1.25534	-1.42677	-1.41168	-1.52116	-1.38959	-0.873926	-1.32359	-1.17008	-0.983307	-1.37413	-1.38351	-0.400205	0.00554992	-0.390824	0.0150878		-0.296149	0.000582099	-0.44966	0.00442017		0.0220866	0.898383	-0.109481	0.430849
0.0558555	0.190961	-0.0725925	0.159903	0.133026	0.0740833	-0.0526736	-0.484116	-0.0547473	-0.238087	-0.0991311	-0.1015	-0.30151	-0.452604	-0.201786	-0.439462	-0.311986	-0.312006	0.0402844	0.130075	-0.164848	-0.679302	-0.674336	-0.754282	-0.443157	-0.388438	-0.2473	0.0580746	0.122337	-0.197179	-0.14624	-0.318633	-0.354484	0.00183702	-0.70264	-0.359632	-0.361469	0.0163366	-0.704477	0.0023863		-0.208245	0.0126808	-0.172394	0.106468		-0.255253	0.114978	0.0642628	0.516295
-0.941208	-0.245764	-0.493572	-0.119738	-0.00734901	-0.105641	0.721707	0.70974	1.01508	-0.280002	-0.39279	-0.16366	0.389057	0.26638	0.481105	1.37966	1.27919	1.31824	-0.253904	-0.0208685	-0.104878	-0.236103	-0.0286574	-0.214952	0.872072	0.710589	0.663842	-0.560182	-0.0775762	0.81551	-0.278817	0.378847	1.3257	-0.12655	-0.159904	0.748834	0.875385	0.0010033	-0.0333536	0.822816		1.60451	0.000238213	0.657665	0.00518124		1.37569	0.00278628	0.482605	0.0816069
1.60323	1.56884	1.59268	1.76864	1.81481	1.80403	1.5695	1.58552	1.50539	1.60563	1.53834	1.54909	1.78635	1.81767	1.90702	1.64509	1.63866	1.63769	1.59176	1.60145	1.59204	1.86605	1.76693	2.07242	1.78126	1.64003	1.64388	1.58825	1.79583	1.55347	1.56435	1.83701	1.64048	1.59508	1.9018	1.68839	0.0933117	0.0657794	0.30672	0.0198117		0.0761266	0.0101695	0.272658	0.00707027		-0.0347821	0.171217	0.207573	0.00648035
-0.447114	-0.982928	-1.19399	-0.71126	-0.733554	-1.45011	-0.578024	-0.854975	-0.509868	-1.00284	-0.743767	-0.893341	-0.851377	-1.17639	-1.00276	-0.917958	-0.691095	-0.948213	-0.863057	-1.9778	-1.25281	-0.762446	-1.19852	-0.80672	-0.55366	-0.582684	-0.609871	-0.874677	-0.964975	-0.647622	-0.879982	-1.01018	-0.852422	-1.36456	-0.922564	-0.582072	0.782485	0.0411581	0.441993	0.246497		0.0275596	0.902029	-0.130195	0.334351		0.227055	0.346601	-0.0902978	0.865276
1.17954	1.0138	1.15383	0.70671	0.633883	0.64111	0.441109	0.458872	0.276928	1.14381	1.02247	1.08463	0.824451	0.835598	0.878107	0.556115	0.61177	0.562692	1.20439	1.1076	1.17514	1.2429	1.3116	1.37786	0.815391	0.906737	0.800233	1.11573	0.660568	0.392303	1.08364	0.846052	0.576859	1.16238	1.31079	0.840787	-0.321589	0.00245658	0.148411	0.0264659		-0.506779	0.000300175	-0.237586	0.00771195		-0.723424	0.00117337	-0.455159	0.00612283
-0.102905	0.414873	0.166516	-0.675044	-0.26292	-0.678759	-0.627508	-0.707407	-0.977005	0.877253	1.04383	0.888005	0.115189	0.240115	0.063803	-0.607114	-0.499758	-0.493838	0.995233	0.404433	0.585414	-0.236075	-0.108688	-0.021781	-0.676455	-0.52395	-0.507844	0.159494	-0.538908	-0.77064	0.936362	0.139702	-0.53357	0.661693	-0.122181	-0.569417	-1.23111	0.00295518	-0.783875	0.0112171		-1.46993	0.000245524	-0.796659	0.00405797		-0.930135	0.00480832	-0.698402	0.034159
-3.09607	-2.37919	-4.15336	-2.48004	-3.7646	-2.85436	-3.38989	-4.0439	-2.92456	-2.991	-1.90515	-2.60692	-2.6666	-2.14342	-2.50123	-0.769417	-0.882995	-0.738193	-2.79995	-3.35249	-2.28476	-2.03021	-2.31106	-2.76784	-1.89596	-1.49898	-1.68675	-3.20954	-3.033	-3.45278	-2.50102	-2.43709	-0.796868	-2.8124	-2.3697	-1.69389	1.11851	0.0169141	0.442697	0.274127		1.70415	0.00362101	0.0639362	0.915817		-0.243245	0.811314	0.176538	0.865004
2.02027	1.95215	1.94567	1.9033	1.69969	1.72195	2.25329	2.17433	2.2676	2.03835	1.9984	1.88192	1.68253	1.9175	1.90365	2.41478	2.26291	2.22747	1.48336	1.61863	1.70272	1.73156	1.66521	1.75302	1.97083	1.98162	1.95971	1.9727	1.77498	2.23174	1.97289	1.83456	2.30172	1.60157	1.7166	1.97072	0.369152	0.00460855	0.115029	0.131593		0.328828	0.00583687	-0.138332	0.180946		0.259043	0.00211731	-0.197715	0.0516865
0.903073	0.990851	0.98814	0.300046	0.342081	0.260283	-0.770993	-0.625737	-0.749737	1.0995	1.02536	1.11264	0.390181	0.0970786	0.335091	-0.76244	-0.863463	-0.679258	0.771668	0.800321	0.890742	0.104396	-0.0405755	0.21286	-0.834975	-0.803871	-0.964946	0.960688	0.300803	-0.715489	1.07917	0.274117	-0.768387	0.82091	0.0922266	-0.867931	-1.68884	0	-0.728684	0.00197007		-1.84755	0.000542373	-0.80505	0.00456548		-1.67618	0	-0.659885	0.00241026
-1.75598	-1.74707	-2.28959	-2.15123	-1.52118	-1.18978	-1.26298	-1.82885	-1.2471	-2.15567	-2.74025	-2.33685	-1.44066	-1.38892	-1.33023	-1.09722	-1.03738	-0.96635	-3.31866	-2.51728	-2.35798	-1.99015	-1.50591	-1.85936	-1.39076	-2.10103	-1.59436	-1.93088	-1.62073	-1.44631	-2.41092	-1.3866	-1.03365	-2.73131	-1.78514	-1.69539	1.03592	0.0264434	0.946168	0.0327736		1.37727	0.001268	1.02432	0.00901559		0.484568	0.0788561	0.310148	0.434453
-0.306884	-0.748996	-0.133769	-0.267004	-0.802574	-0.450641	-0.616289	-0.799304	-0.791633	-0.422645	-0.766296	-0.276842	-0.64212	-0.647602	-2.00788	-3.774	-0.851795	-0.751664	-0.61218	-0.685126	-0.91868	-1.05467	-1.08348	-1.65816	-0.998331	-0.951445	-1.1743	-0.396549	-0.50674	-0.735742	-0.488594	-1.0992	-1.79249	-0.738662	-1.26544	-1.04136	-0.302696	0.0322569	-0.526777	0.0508497		-1.30389	0.151716	-0.610606	0.256389		-0.339193	0.08802	-0.11019	0.754971
-0.189739	-0.242516	-0.294212	-0.24703	-0.273892	-0.231899	0.0755613	0.127053	0.106315	-0.24798	-0.148421	-0.134435	-0.0750868	0.0595663	-0.148786	0.288672	0.225757	0.34785	-0.106351	-0.24105	-0.172395	-0.0197265	0.0114665	-0.0639992	0.0920498	0.00194383	0.000558853	-0.242156	-0.25094	0.102977	-0.176945	-0.054769	0.287426	-0.173265	-0.0240864	0.0315175	0.204783	0.0103706	0.149179	0.0213568		0.464372	0.000752599	0.122176	0.144169		0.345133	0.000714171	-0.00878469	0.86728
-1.36821	-1.58075	-1.3469	-1.35691	-1.37494	-1.4414	-1.60054	-1.51369	-1.83326	-1.50175	-1.41071	-1.6283	-1.34556	-1.32341	-1.75429	-1.61017	-1.70116	-1.49886	-0.674377	-1.13904	-0.992686	-0.163	-0.296875	-0.428502	-1.48202	-1.45266	-1.49437	-1.43195	-1.39108	-1.64916	-1.51358	-1.47442	-1.6034	-0.935367	-0.296125	-1.47635	-0.540983	0.0116634	0.639241	0.0121086		-0.0898116	0.244588	0.0391641	0.875722		-0.217212	0.0841747	0.0408679	0.713419
0.925649	0.671401	1.08152	-0.716578	0.189219	0.218716	-1.64449	-1.91902	-1.37784	0.425681	0.240068	0.357357	-1.82305	-1.58096	-1.12719	-1.39422	-0.926018	-2.45582	0.344915	0.405635	0.430403	-0.907397	-0.161448	-0.620756	-3.27408	-2.06614	-1.08206	0.892858	-0.102881	-1.64712	0.341035	-1.5104	-1.59202	0.393651	-0.5632	-2.14076	-2.53441	0.0112514	-0.956851	0.0102719		-1.93305	0.00646146	-1.85144	0.00483912		-2.53998	0.000404762	-0.995739	0.045501
-0.805759	-0.749453	-0.67616	-0.96956	-1.12024	-1.03677	-0.232221	-0.509104	-0.424349	-1.4015	-1.73746	-1.28115	-1.34574	-1.54673	-1.44386	-0.844	-0.647468	-0.780731	-0.676531	-0.704971	-0.975504	-0.93122	-0.753592	-0.767108	-0.711502	-0.997757	-0.596237	-0.743791	-1.04219	-0.388558	-1.47337	-1.44544	-0.7574	-0.785669	-0.817307	-0.768499	0.0171699	0.954031	-0.0316381	0.859605		0.715969	0.00454267	0.0279294	0.912691		0.355233	0.0103379	-0.298399	0.0144884
-1.38265	-1.10762	-1.36211	-1.47604	-1.37936	-1.44344	-1.51823	-1.34885	-1.23222	-1.5701	-1.5455	-1.31505	-1.53121	-1.7215	-1.53139	-1.3644	-1.3967	-1.65753	-1.36914	-1.38904	-1.3832	-1.76376	-1.24444	-1.62128	-1.27229	-1.45091	-1.43568	-1.28413	-1.43294	-1.36643	-1.47688	-1.5947	-1.47287	-1.38046	-1.54316	-1.3863	-0.0058372	0.959234	-0.162702	0.335822		0.00400861	0.988835	-0.117822	0.306395		-0.0823078	0.573877	-0.148818	0.182079
-1.22721	-1.64567	-1.56566	-1.59895	-1.49028	-1.65403	-1.2594	-1.18333	-1.71213	-1.38711	-1.29418	-1.24619	-1.43495	-1.40922	-1.26062	-1.54053	-1.35712	-1.47392	-1.4514	-1.43446	-1.55713	-1.90129	-1.78951	-2.15403	-2.72369	-1.94633	-1.79098	-1.47951	-1.58109	-1.38495	-1.30916	-1.36826	-1.45719	-1.481	-1.94828	-2.15367	-0.67267	0.0450692	-0.467281	0.0119925		-0.14803	0.0418308	-0.0591033	0.459354		0.0945595	0.77439	-0.101577	0.557301
0.000536203	0.0196102	-0.0914686	-0.148736	-0.0712972	-0.1819	0.139504	0.18906	0.129391	-0.0336597	0.0395126	-0.0428455	-0.139488	-0.106318	-0.123299	0.198964	0.187027	0.244602	0.093209	-0.0193894	-0.0620301	0.0557058	-0.0584407	-0.0397344	-0.0617998	-0.0749829	0.128399	-0.0237741	-0.133978	0.152652	-0.0123308	-0.123035	0.210198	0.00392985	-0.0141564	-0.00279442	-0.00672428	0.96756	-0.0180863	0.845722		0.222529	0.00150278	-0.110704	0.0208707		0.176426	0.00691971	-0.110204	0.0828198
-0.260332	-0.286121	-0.28294	-0.213376	-0.405261	-0.327705	-0.278336	-0.216125	-0.319335	-0.185058	-0.221773	-0.295743	-0.122929	-0.156367	0.0732281	-0.168126	-0.196493	-0.184509	-0.267703	-0.241099	-0.206786	0.0263989	0.0226989	0.361405	0.107495	0.237512	-0.0141339	-0.276465	-0.315447	-0.271266	-0.234191	-0.0686891	-0.183043	-0.238529	0.136834	0.110291	0.34882	0.00758032	0.375364	0.0219042		0.0511489	0.104291	0.165502	0.0944103		0.00519896	0.930719	-0.0389826	0.592687
-0.984326	-0.95876	-0.966769	-0.852834	-0.85147	-0.871831	-0.850317	-0.788563	-0.965825	-0.99182	-1.17691	-1.16233	-1.0317	-0.871825	-0.918622	-0.996986	-1.00262	-1.10223	-1.64212	-1.43705	-1.45852	-1.06465	-1.04274	-0.987458	-0.813095	-0.677276	-0.730254	-0.969951	-0.858712	-0.868235	-1.11035	-0.940714	-1.03394	-1.51256	-1.03162	-0.740208	0.772354	0.00101304	0.480946	0.00330298		0.0764074	0.212581	0.169638	0.0832215		0.101716	0.0709982	0.11124	0.00610526
-1.85078	-1.50569	-1.36129	-1.69865	-1.67312	-1.81192	-2.07468	-1.95128	-2.24749	-1.74895	-1.7678	-1.64149	-1.70848	-1.60695	-1.71014	-2.02491	-1.67319	-1.68895	-1.03576	-1.1048	-1.21986	-0.764207	-1.14442	-0.817547	-1.51607	-1.80859	-1.88902	-1.57259	-1.7279	-2.09115	-1.71941	-1.67519	-1.79568	-1.12014	-0.908726	-1.73789	-0.617752	0.00684657	0.211415	0.139597		-0.0762706	0.627106	0.0442235	0.470172		-0.518565	0.0198798	-0.155311	0.381948
0.756142	0.700621	0.713496	0.733582	0.821826	0.83349	0.605486	0.613885	0.521117	0.686393	0.56587	0.530341	0.685934	0.758137	0.796419	0.651485	0.599663	0.571265	0.497098	0.594686	0.583059	0.844073	0.777775	1.03892	0.863429	0.692225	0.61915	0.72342	0.796299	0.580163	0.594201	0.74683	0.607471	0.558281	0.886924	0.724935	0.166654	0.0571993	0.328643	0.0135905		0.0132699	0.901015	0.152629	0.0533559		-0.143257	0.00848525	0.0728794	0.109776
-2.31481	-2.50059	-2.15172	-2.05385	-2.30259	-2.06264	-2.07309	-2.15106	-2.01705	-2.5244	-2.3179	-2.50938	-2.22507	-2.25776	-2.58959	-1.90921	-2.15851	-2.53618	-2.43767	-2.29888	-2.31712	-2.26405	-2.23151	-2.47071	-2.25477	-2.2126	-2.0203	-2.32237	-2.13969	-2.0804	-2.45056	-2.35747	-2.2013	-2.35122	-2.32209	-2.16256	0.188669	0.049142	0.0291341	0.830954		0.249266	0.15638	0.0930889	0.584687		0.24197	0.0481955	0.182679	0.231303
-2.15065	-2.16203	-2.34911	-2.27526	-2.65398	-2.66036	-2.18571	-2.21351	-2.38161	-1.99459	-2.46675	-2.29668	-2.01081	-2.06531	-1.99336	-1.75045	-1.87384	-1.75456	-2.51641	-3.18576	-3.4097	-2.3211	-2.45929	-2.36258	-2.39094	-2.40614	-2.6519	-2.2206	-2.52987	-2.26028	-2.25267	-2.02316	-1.79295	-3.03729	-2.38099	-2.48299	0.554298	0.0688079	0.656301	0.0512027		0.459723	0.0142631	0.229512	0.160948		-0.0396775	0.777918	-0.309267	0.0960063
-2.07227	-1.82897	-2.04286	-2.19058	-2.03528	-2.17782	-0.16592	-0.231647	-0.651466	-2.2303	-2.15467	-2.26371	-2.46338	-2.0215	-1.92956	-1.07994	-0.969428	-1.23475	-0.893658	-1.03315	-0.578488	-1.36857	-1.29144	-1.08185	0.441235	0.888248	0.618222	-1.98137	-2.13456	-0.349678	-2.21623	-2.13814	-1.09471	-0.835099	-1.24728	0.649235	1.48433	0.00191148	-0.412186	0.0432012		1.12152	0.00031793	0.0780839	0.75021		1.63169	0.00098059	-0.153194	0.166603
-0.140032	-0.366605	-0.335654	-0.432131	-0.471281	-0.463249	0.443203	0.509165	0.3787	0.0623558	-0.137674	-0.24745	-0.455406	-0.40531	-0.386704	0.599375	0.524153	0.570144	-0.782158	-0.775388	-0.691972	-0.449908	-0.469779	-0.419518	0.35314	0.351747	0.291158	-0.280764	-0.455554	0.443689	-0.107589	-0.415807	0.564557	-0.749839	-0.446401	0.332015	1.08185	0	0.303438	0.00167213		0.672146	0.00149413	-0.308217	0.0327313		0.724453	0.00117756	-0.17479	0.0750675
-0.350142	-0.625192	-0.709278	-0.302972	-0.471371	-0.42873	-0.341675	-0.247665	-0.293866	-0.942933	-0.826785	-1.0267	-0.897137	-0.77951	-0.774825	-0.657271	-0.631584	-0.535216	-1.17319	-1.00471	-1.09547	-0.78815	-1.29269	-0.741185	-0.822091	-0.877519	-0.730111	-0.561538	-0.401024	-0.294402	-0.932139	-0.817157	-0.608024	-1.09112	-0.940674	-0.809907	0.281216	0.00936214	0.150449	0.482361		0.324115	0.00498781	0.114982	0.163078		0.267135	0.0405168	0.160513	0.250767
-0.236239	-0.283378	0.292242	0.00908709	-0.0477257	0.24197	0.352199	0.0784967	0.293135	0.334591	0.497781	0.0241268	0.426895	0.25611	0.410397	-0.00342417	-0.316384	-0.0862088	0.481585	0.251746	0.205241	0.516909	0.22964	0.426514	0.693263	0.834871	0.623746	-0.0757914	0.067777	0.241277	0.2855	0.364467	-0.135339	0.312857	0.391021	0.717293	0.404436	0.012564	0.0781639	0.610796		-0.420839	0.0292127	0.0789677	0.707012		0.317068	0.11587	0.143568	0.587126
0.556539	0.723218	0.777664	1.06443	1.05345	0.997797	0.548	0.511777	0.468543	0.387858	0.364283	0.330786	0.88264	0.751628	0.931809	0.328486	0.541373	0.489635	0.0260994	0.144106	0.133477	1.01737	0.669757	0.724194	0.0904119	0.258825	0.0314727	0.685807	1.03856	0.50944	0.360976	0.855359	0.453165	0.101228	0.803774	0.126903	0.0256755	0.849654	0.702547	0.00554337		0.0921893	0.129878	0.494383	0.00486984		-0.176367	0.0350914	0.352755	0.0153234
1.53217	1.59209	1.64118	1.90144	1.88809	1.85325	1.63775	1.6851	1.67904	1.71484	1.77702	1.70675	2.02878	1.9405	1.97324	1.81468	1.79482	1.80001	1.84555	1.81238	1.78355	1.77704	1.71513	1.59364	1.66298	1.82523	1.75493	1.58848	1.88093	1.66729	1.73287	1.98084	1.80317	1.81383	1.69527	1.74771	-0.0661124	0.177174	-0.118555	0.075629		0.0703015	0.0166185	0.24797	0.00524838		0.0788129	0.0469372	0.292445	0.00578648
1.22809	1.30317	1.09292	0.971339	1.11519	0.977722	0.294329	0.312209	0.384944	1.23416	1.32157	1.28591	1.05356	1.03388	0.896278	0.22406	0.319616	0.23598	1.34259	1.25837	1.12139	0.700207	0.915752	0.585402	0.103467	0.118059	0.261437	1.20806	1.02142	0.330494	1.28055	0.994572	0.259885	1.24078	0.733787	0.160988	-1.07979	0.000769231	-0.506996	0.0103442		-1.02066	0.000329897	-0.285976	0.0128619		-0.877564	0.000409639	-0.186641	0.0764557
-1.49462	-1.57	-1.4573	-1.52523	-1.59908	-1.65551	-1.19503	-0.983687	-1.01437	-1.86171	-1.82254	-1.79183	-1.70312	-1.69911	-1.76596	-1.43332	-1.46092	-1.59938	-1.53194	-1.67627	-1.62615	-1.68743	-1.97555	-1.97311	-1.32682	-1.48092	-1.59268	-1.5073	-1.59327	-1.06436	-1.82536	-1.72273	-1.49787	-1.61145	-1.8787	-1.46681	0.144644	0.106628	-0.267246	0.0441994		0.327495	0.00251622	0.102633	0.0293448		0.44294	0.00279821	-0.0859679	0.159416
0.483531	0.586721	0.382337	0.415578	0.179118	0.475378	1.27617	1.24026	1.28583	0.640217	0.611352	0.487141	0.589624	0.700518	0.745004	1.28696	1.29645	1.17527	0.530219	0.541509	0.585367	1.01658	0.912145	0.876512	0.977892	1.07473	1.02545	0.484196	0.356691	1.26742	0.57957	0.678382	1.25289	0.552365	0.935079	1.02602	0.473658	0.000961538	0.382714	0.00212975		0.673322	0.000605492	0.098812	0.192708		0.783223	0.000405244	-0.127505	0.309956
-1.51942	-1.75153	-1.73614	-1.80704	-2.32601	-1.48468	-1.88722	-1.87448	-1.8986	-1.72769	-1.91984	-1.61168	-2.16228	-1.79062	-2.04061	-1.82635	-1.72315	-1.86136	-2.48887	-3.05116	-2.20731	-2.34558	-2.37015	-2.59305	-2.46805	-2.32467	-2.81301	-1.66903	-1.87258	-1.88677	-1.75307	-1.99784	-1.80362	-2.58244	-2.43626	-2.53524	0.0472004	0.932082	0.146186	0.680239		-0.0505487	0.744439	-0.244763	0.144174		-0.217737	0.0237769	-0.203549	0.521528
-1.15664	-1.02605	-1.06487	-0.873915	-0.766078	-0.666257	-0.587506	-0.544531	-0.608473	-0.904458	-0.804938	-0.739293	-0.798514	-0.809653	-0.784946	-0.444905	-0.518534	-0.431228	-0.897008	-0.870421	-0.869462	-1.31087	-1.29612	-1.39576	-1.06726	-1.18444	-1.01693	-1.08252	-0.76875	-0.58017	-0.81623	-0.797704	-0.464889	-0.878963	-1.33425	-1.08954	-0.210581	0.0100476	-0.455289	0		0.351341	0.00223525	0.0185252	0.805504		0.502349	0.000333988	0.313769	0.0198777
-0.162303	-0.358529	-0.209522	-0.37524	-0.314179	-0.279956	-0.152424	-0.0530803	-0.0742824	-0.52588	-0.523747	-0.58956	-0.46347	-0.488218	-0.522067	-0.214358	-0.20034	-0.182829	-0.486766	-0.657748	-0.528063	-0.07951	-0.0385852	-0.190669	-0.144806	-0.194655	-0.224163	-0.243452	-0.323125	-0.0932623	-0.546396	-0.491252	-0.199176	-0.557526	-0.102921	-0.187875	0.369651	0.00315411	0.454604	0.00422366		0.34722	0.000236305	0.0551442	0.105706		0.150189	0.0469442	-0.0796737	0.294743
1.2425	1.2335	0.707752	1.23793	1.11074	1.26266	1.19704	1.3912	1.3049	1.20387	-0.328497	0.936343	0.908402	0.840697	0.979201	-0.942469	0.820056	0.840669	1.2217	1.19378	1.18648	1.41847	1.31838	1.45574	1.24839	1.10781	0.834427	1.06125	1.20377	1.29771	0.603904	0.909433	0.239419	1.20065	1.39753	1.06354	-0.137112	0.249196	0.196874	0.0084937		-0.364485	0.766832	0.305529	0.621431		0.236465	0.181454	0.142526	0.530903
-0.0778239	0.106142	-0.0727837	-0.202312	0.0795765	0.0396152	-0.0449193	-0.0851557	-0.0800083	-0.186246	-0.138558	-0.200632	-0.216017	-0.402838	-0.261649	-0.06109	-0.0443416	-0.067729	-0.497434	-0.400472	-0.521295	-0.621665	-0.543285	-0.710595	-0.459323	-0.504163	-0.386837	-0.0148219	-0.0277069	-0.0700277	-0.175145	-0.293502	-0.0577202	-0.473067	-0.625182	-0.450108	0.0229593	0.768867	-0.152115	0.0469075		0.117425	0.00254484	-0.118356	0.107		-0.0552058	0.36844	-0.012885	0.942955
-2.03128	-2.47538	-1.91929	-1.85649	-2.01592	-1.56574	-1.69216	-1.41884	-1.69043	-2.11315	-2.64397	-2.46513	-1.84664	-1.97776	-2.21554	-1.67404	-1.77351	-1.64419	-2.09227	-2.52967	-2.11785	-1.97669	-2.00021	-2.2475	-1.84084	-1.82541	-1.57278	-2.14198	-1.81272	-1.60048	-2.40741	-2.01331	-1.69725	-2.2466	-2.0748	-1.74634	0.500254	0.0227917	0.171797	0.344765		0.710168	0.00584874	0.3941	0.0976575		0.541505	0.0256612	0.329267	0.197998
-2.33891	-2.15388	-2.26782	-3.06527	-2.79448	-2.5983	-2.5837	-2.68332	-2.49568	-1.54548	-1.62586	-1.48071	-3.07167	-2.11877	-2.05343	-2.33732	-2.83768	-2.73399	-1.90291	-1.92061	-1.80083	-3.30836	-2.90213	-3.12622	-2.80075	-2.46122	-2.61051	-2.25354	-2.81935	-2.58757	-1.55068	-2.41462	-2.63633	-1.87478	-3.11224	-2.62416	-0.749378	0.00255169	-1.23745	0.0012096		-1.08565	0.00164615	-0.863942	0.0561791		-0.334031	0.00755665	-0.565816	0.0264527
-0.493095	-0.3346	-0.4718	-0.360057	-0.379926	-0.363222	0.0158203	-0.0358493	-0.0309188	-0.656846	-0.525201	-0.550902	-0.429153	-0.310672	-0.362973	-0.0149312	-0.0482216	-0.0988617	-0.547838	-0.531893	-0.614646	-1.00508	-1.07165	-0.746789	-0.331962	-0.447694	-0.247187	-0.433165	-0.367735	-0.0169826	-0.57765	-0.367599	-0.0540048	-0.564792	-0.941174	-0.342281	0.222512	0.0157991	-0.376381	0.0152197		0.523645	0.000610398	0.210051	0.0209049		0.416182	0.00146451	0.0654298	0.262589
-1.14441	-1.32861	-1.32883	-1.48249	-1.33652	-1.66367	-1.17726	-1.09967	-1.02788	-1.14512	-1.24901	-1.15862	-1.25509	-1.2453	-1.16719	-1.02378	-0.980892	-0.983835	-1.34796	-1.4957	-1.40144	-1.28411	-1.37046	-1.25683	-0.889181	-0.963622	-0.911116	-1.26728	-1.49423	-1.1016	-1.18425	-1.22253	-0.99617	-1.41503	-1.3038	-0.921306	0.493726	0.0010216	0.111231	0.0823949		0.188079	0.00361875	-0.0382771	0.440922		0.16568	0.0502344	-0.226944	0.113005
-1.02779	-0.950449	-1.17705	-0.820752	-0.706348	-0.684423	-0.351401	-0.373471	-0.463836	-0.796831	-0.846076	-0.89172	-0.815324	-0.606752	-0.570861	-0.558059	-0.562675	-0.549941	-0.923481	-0.782088	-0.958594	-0.37893	-0.547797	-0.43874	-0.340921	-0.345549	-0.27419	-1.05176	-0.737174	-0.396236	-0.844875	-0.664312	-0.556891	-0.888054	-0.455156	-0.32022	0.567834	0.00093071	0.432899	0.00590602		0.287984	0.000678967	0.180563	0.0833085		0.655526	0.00112484	0.314588	0.0247563
-2.4915	-1.25621	-1.70229	-1.11661	-2.24122	-2.79627	-2.62717	-1.6556	-2.43915	-2.38014	-2.27813	-2.415	-1.98078	-2.50002	-3.33174	-2.33581	-3.82806	-2.12449	-1.56025	-1.92832	-3.84763	-2.66498	-3.31926	-3.8497	-2.01894	-2.11366	-2.63679	-1.81667	-2.05137	-2.24064	-2.35775	-2.60418	-2.76279	-2.4454	-3.27798	-2.25646	0.188937	0.889194	-0.832577	0.33158		-0.405035	0.474987	-0.246429	0.637746		-0.423977	0.358679	-0.234701	0.802456
-0.912523	-0.876034	-0.851685	-0.784228	-0.979658	-0.975286	-0.782906	-0.695173	-0.809254	-0.663045	-0.793218	-0.821467	-0.656424	-0.721632	-0.558213	-0.687082	-0.639201	-0.581407	-0.916129	-1.02017	-0.9061	-0.570039	-0.628647	-0.357111	-0.22747	-0.167565	-0.403967	-0.880081	-0.913057	-0.762445	-0.759243	-0.645423	-0.635897	-0.947466	-0.518599	-0.266334	0.681132	0.00173257	0.428867	0.00807325		0.123347	0.0436233	0.11382	0.154143		0.117636	0.0206718	-0.0329765	0.730645
-0.732019	-0.866253	-0.904856	-0.90648	-0.860277	-0.866347	-0.84979	-0.917269	-0.85566	-0.968383	-0.927596	-0.834228	-1.07354	-1.11265	-1.10523	-0.863984	-0.873134	-0.898986	-1.14893	-1.04152	-1.12882	-1.32379	-1.12085	-1.44411	-1.12623	-1.1361	-1.03436	-0.834376	-0.877701	-0.874239	-0.910069	-1.09714	-0.878701	-1.10642	-1.29625	-1.0989	0.00752076	0.933179	-0.189828	0.0963036		0.0313679	0.464113	-0.187068	0.0162409		-0.0398634	0.5467	-0.0433255	0.518902
-1.60236	-1.76323	-1.8244	-2.10248	-2.01363	-1.8121	-1.49932	-1.39398	-1.5927	-1.94418	-1.88274	-2.12255	-2.19908	-1.96473	-2.11251	-1.52124	-1.80084	-1.58233	-2.19775	-2.28789	-2.00393	-2.19215	-2.24732	-1.88302	-2.14394	-1.87619	-2.01676	-1.73	-1.97607	-1.49533	-1.98316	-2.09211	-1.6348	-2.16319	-2.1075	-2.0123	0.150894	0.17439	0.0556924	0.79639		0.348354	0.015155	-0.108951	0.327121		0.234661	0.0296532	-0.246073	0.0871172
-0.107709	-0.109597	-0.139647	-0.103915	0.0102901	0.117766	-0.113582	-0.110933	-0.162983	0.305175	0.28002	0.398494	0.455678	0.477896	0.52277	0.411839	0.457306	0.41449	0.445377	0.522928	0.581978	0.49443	0.482252	0.592767	0.265543	0.129892	0.0976052	-0.118984	0.0080471	-0.129166	0.327897	0.485448	0.427878	0.516761	0.52315	0.164347	-0.352414	0.00500399	0.00638882	0.945723		0.0999818	0.0273795	0.157551	0.0225813		-0.0101814	0.729595	0.127032	0.119095
2.7471	2.66652	2.60117	2.50459	2.41188	2.38001	3.5199	3.43794	3.52836	2.64436	2.72766	2.46736	2.57871	2.52532	2.59037	3.33138	3.24876	3.33929	2.04588	2.11175	2.07944	2.8174	2.6958	2.7201	3.01589	3.08188	3.03285	2.67159	2.43216	3.4954	2.61313	2.5648	3.30647	2.07902	2.74443	3.04354	0.964521	0	0.665411	0		0.693347	0.000948415	-0.0483256	0.648235		0.823808	0.000445242	-0.239433	0.0219415
-0.696722	-0.778152	-0.824137	-0.664998	-0.66572	-0.521296	-0.516799	-0.645802	-0.765247	-0.752492	-0.608095	-0.545995	-0.657837	-0.345017	-0.520335	-0.158002	-0.766698	-0.425636	-0.743653	-0.932782	-0.750963	-0.605595	-0.594235	-0.580803	-0.577631	-0.606436	-0.570855	-0.766337	-0.617338	-0.642616	-0.635527	-0.50773	-0.450112	-0.809133	-0.593545	-0.584974	0.224159	0.0150258	0.215588	0.0189019		0.185415	0.270485	0.127798	0.296581		0.123721	0.122002	0.148999	0.0738155
-0.677868	-1.0866	-1.49597	-1.58519	-1.57714	-0.89381	-1.09797	-1.37338	-1.90219	-1.02263	-0.940636	-1.51816	-1.30846	-0.958112	-1.31001	-1.69422	-1.52725	-1.58058	-1.43199	-1.4755	-1.79561	-2.25602	-2.47524	-2.09711	-1.58334	-1.94035	-2.06219	-1.08681	-1.35205	-1.45785	-1.16047	-1.19219	-1.60068	-1.5677	-2.27612	-1.86196	-0.294261	0.114646	-0.708424	0.00982103		-0.440209	0.034209	-0.0317185	0.931703		-0.371034	0.241102	-0.265235	0.513084
-2.03289	-2.17772	-1.99432	-1.55729	-1.82137	-2.07912	-1.68312	-1.83307	-1.82232	-1.81637	-2.02162	-2.07707	-1.67767	-1.57626	-1.42073	-1.46235	-1.45197	-1.37682	-2.30008	-2.06957	-1.90098	-1.38961	-1.54875	-1.5047	-1.20859	-1.56253	-1.58464	-2.06831	-1.81926	-1.7795	-1.97168	-1.55822	-1.43038	-2.09021	-1.48102	-1.45192	0.638291	0.0126285	0.609191	0.0076978		0.541306	0.00214291	0.413465	0.0228915		0.288808	0.0105342	0.249048	0.193536
1.18301	0.90438	0.791517	0.964253	0.802118	0.880474	1.17703	1.24949	1.25143	0.0235169	0.144466	-0.0629814	0.304332	0.298609	0.467641	0.575276	0.763869	0.703117	0.271305	0.214863	0.169114	0.69102	0.499413	0.932137	1.09569	1.10742	1.09828	0.959634	0.882282	1.22598	0.0350005	0.356861	0.680754	0.218428	0.707523	1.10046	0.882035	0	0.489096	0.014201		0.645754	0.00122861	0.32186	0.0214258		0.26635	0.0481525	-0.0773523	0.647512
-0.356421	-0.39498	-0.402364	-0.260508	-0.359165	-0.242834	-0.128872	-0.0717304	0.0259612	-0.45929	-0.246366	-0.308285	-0.130122	-0.264736	0.0507157	-0.141838	0.0262432	-0.0752888	-0.540742	-0.459091	-0.470864	0.221682	-0.13061	0.0280089	0.0815289	0.16227	0.278282	-0.384588	-0.287502	-0.0582138	-0.33798	-0.114714	-0.0636279	-0.490232	0.0396936	0.174027	0.664259	0.000961117	0.529926	0.00741929		0.274352	0.0117231	0.223266	0.105561		0.326374	0.00211631	0.0970859	0.0711328
-0.519775	-0.393898	-0.287571	-0.417141	-0.24561	-0.302005	-1.03375	-0.871814	-1.12609	0.0219738	0.110207	0.275302	-0.0264747	0.156697	0.0724642	-0.897388	-0.820622	-0.730176	0.564613	0.444358	0.529792	-0.360956	-0.167828	-0.375561	-0.961594	-0.791007	-0.650728	-0.400415	-0.321585	-1.01055	0.135827	0.067562	-0.816062	0.512921	-0.301448	-0.80111	-1.31403	0.000822368	-0.814369	0.00143182		-0.951889	0.000650386	-0.0682654	0.543466		-0.610134	0.00279668	0.0788294	0.429
2.08561	2.0262	2.07758	1.76553	1.71495	1.62812	2.6583	2.66369	2.70137	2.27702	2.28488	2.20847	1.78022	1.84388	1.81641	2.89949	2.8695	2.90261	2.04772	2.0633	2.13206	2.42253	2.5123	2.47617	2.56983	2.56622	2.61321	2.06313	1.70287	2.67445	2.25679	1.8135	2.89053	2.08103	2.47033	2.58309	0.502058	0.000656085	0.389303	0.00139483		0.633737	0.000279883	-0.44329	0.00422857		0.611321	0	-0.360265	0.00632195
-1.48735	-1.60663	-1.624	-1.31182	-1.36453	-1.41579	-1.87317	-1.8257	-1.94529	-1.75951	-1.83481	-2.22135	-1.71535	-1.4658	-1.42626	-1.79562	-1.91673	-2.31309	-2.26865	-2.0106	-2.08445	-1.17142	-1.1898	-0.94407	-1.45128	-1.61623	-1.83092	-1.57266	-1.36405	-1.88139	-1.93856	-1.5358	-2.00848	-2.12123	-1.10176	-1.63281	0.48842	0.0140408	1.01947	0.00165182		-0.0699255	0.865259	0.402753	0.0714192		-0.308723	0.00345304	0.208613	0.0248717
0.578317	0.57515	0.615842	0.821874	0.882858	0.90967	1.25594	1.26601	1.29449	0.617345	0.614815	0.651084	0.953934	0.865015	0.837067	1.42491	1.3732	1.40628	0.402692	0.375502	0.418134	0.387117	0.41132	0.241965	0.689483	0.729259	0.801069	0.58977	0.871467	1.27215	0.627748	0.885339	1.40146	0.398776	0.346801	0.739937	0.341161	0.000943625	-0.0519754	0.391574		0.773716	0	0.257591	0.00596204		0.682378	0	0.281698	0.00555665
-1.24118	-1.10524	-1.15044	-0.787706	-0.717488	-0.884679	-0.454568	-0.448216	-0.451284	-1.49286	-1.56367	-1.21217	-0.667239	-0.684066	-0.63165	-0.865926	-0.904732	-0.87316	-1.08285	-0.367011	-0.723332	-0.215036	-0.225348	-0.0398979	-0.00501943	0.136016	-0.0168433	-1.16562	-0.796625	-0.451356	-1.4229	-0.660985	-0.881273	-0.724399	-0.160094	0.038051	0.76245	0.0147912	0.564305	0.0416595		0.541628	0.0044152	0.761915	0.00576147		0.714264	0	0.368995	0.011678
0.775144	0.738815	0.815245	0.85	0.736618	0.767981	0.747349	0.726798	0.76785	0.654065	0.706901	0.644058	0.79413	0.775182	0.792073	0.741278	0.80582	0.770103	0.289829	0.225659	0.263288	0.138666	0.0766335	0.103961	0.577769	0.574764	0.381739	0.776401	0.784866	0.747332	0.668341	0.787129	0.7724	0.259592	0.10642	0.511424	0.251832	0.0131267	-0.153172	0.00592029		0.104059	0.00874263	0.118787	0.00908741		-0.0290693	0.220981	0.00846505	0.898836
1.41664	0.462468	0.734574	0.706148	1.26225	1.51315	1.99562	1.94872	2.04934	1.36483	1.48744	1.51593	1.49444	1.69728	1.5944	1.66352	1.91009	1.66961	1.703	1.63585	1.88329	1.24484	1.54723	1.58291	2.25806	2.19929	2.22266	0.871228	1.16052	1.9979	1.45606	1.59537	1.74774	1.74071	1.45832	2.22667	0.48596	0.00325662	-0.282388	0.0683356		0.291677	0.0153209	0.139309	0.122818		1.12667	0.0102757	0.289288	0.530077
0.243222	0.321463	0.3439	0.271969	0.283278	0.272404	0.301182	0.188621	0.13885	0.148628	0.257518	0.326282	0.204662	0.0953414	0.166058	0.252877	0.234904	0.253369	0.148267	0.126241	0.0199587	-0.0525162	0.0450172	-0.0925283	0.11877	-0.0948145	0.00457478	0.302862	0.275884	0.209551	0.244143	0.155354	0.24705	0.0981557	-0.0333424	0.00951004	-0.0886457	0.214089	-0.131498	0.0574333		0.00290759	0.980511	-0.0887889	0.203674		-0.0933107	0.104353	-0.0269779	0.465844
-0.909912	-1.08862	-0.891112	-1.20277	-1.163	-0.935068	-1.2356	-1.44238	-1.15278	-1.2331	-1.15226	-1.16777	-0.936769	-0.961679	-1.03843	-1.27363	-1.31568	-1.14328	-1.04915	-0.894183	-1.09069	-1.13179	-1.18443	-1.64596	-1.38188	-1.29219	-1.14652	-0.963216	-1.10028	-1.27692	-1.18438	-0.97896	-1.2442	-1.01134	-1.32073	-1.27353	-0.262189	0.0252739	-0.309388	0.111573		-0.0598186	0.246307	0.205418	0.0124388		-0.313703	0.0227948	-0.137065	0.26095
1.15794	1.23859	1.31679	1.26943	1.27316	0.925068	0.447669	0.35243	0.389275	1.47458	1.31308	1.21536	1.34104	1.24611	1.39394	0.195175	0.274624	0.279132	1.12395	1.02462	1.13363	0.96473	0.738833	0.873448	0.010474	0.616847	0.0945263	1.23778	1.15589	0.396458	1.33434	1.32703	0.249644	1.09407	0.859004	0.240616	-0.853451	0.0089249	-0.235064	0.0244856		-1.0847	0.000321796	-0.00730872	0.961234		-0.841317	0.000430556	-0.0818883	0.615667
0.128832	0.190375	-0.0512931	0.0698428	-0.0447178	-0.123922	0.130596	-0.12486	-0.0199649	-0.040354	-0.178704	0.131827	0.202701	-0.0859492	0.0343029	-0.16243	-0.215037	-0.233402	-0.330703	-0.0983503	-0.0128653	-0.52917	-0.231133	-0.472184	0.204931	0.223487	-0.00435543	0.0893045	-0.0329323	-0.00474286	-0.0290769	0.0503515	-0.203623	-0.147306	-0.410829	0.141354	0.28866	0.0407151	-0.263522	0.0846947		-0.174546	0.0612652	0.0794284	0.619901		-0.0940474	0.358463	-0.122237	0.254208
0.342202	0.131152	0.0651801	-0.0228767	-0.216901	-0.182034	0.466339	0.522562	0.452711	-0.449911	-0.254001	-0.329905	-0.130299	-0.161509	-0.306682	0.436864	0.49073	0.423087	-0.635341	-0.624156	-0.729707	-0.351097	-0.340868	-0.0481625	0.106885	-0.23336	-0.175674	0.179511	-0.140604	0.480537	-0.344605	-0.199497	0.450227	-0.663068	-0.246709	-0.100716	0.562352	0.00621152	0.416358	0.0131766		0.794833	0.000305506	0.145109	0.12605		0.301026	0.0137924	-0.320115	0.0425582
1.85772	1.92266	2.0528	2.20961	2.14501	2.1229	2.14026	2.14605	2.13369	1.9627	1.95718	1.87162	2.06693	2.03532	2.10319	2.12624	2.14041	2.11057	1.97011	1.96415	1.96083	1.78934	1.64616	1.60193	2.1385	2.34028	2.22876	1.94439	2.15918	2.14	1.9305	2.06848	2.12574	1.96503	1.67914	2.23585	0.270818	0.00767989	-0.285888	0.00742994		0.195239	0.00223126	0.137979	0.0218208		0.195611	0.0150856	0.214783	0.034541
-1.9503	-1.81244	-1.92944	-2.1448	-1.39285	-1.55228	-1.62876	-2.01363	-1.54738	-2.23167	-1.77895	-2.08084	-1.77352	-1.77482	-1.8933	-1.90943	-1.62728	-1.75223	-1.70281	-1.52341	-1.5454	-1.72122	-1.48915	-1.35538	-1.09681	-1.41735	-1.44366	-1.89739	-1.69664	-1.72992	-2.03048	-1.81388	-1.76298	-1.59054	-1.52192	-1.31927	0.271266	0.0536116	0.068622	0.675391		0.267503	0.0783104	0.216601	0.177847		0.167468	0.239384	0.200749	0.475711
-0.250973	0.0997908	-0.0149057	-0.0126839	0.321491	-0.0287156	-0.128266	-0.1062	-0.137806	0.260257	0.33293	0.357455	0.294116	0.121329	0.0232871	-0.211204	-0.0354147	-0.0743942	0.304459	0.435274	0.262953	0.435461	0.298445	0.132957	-0.165066	-0.410694	-0.311263	-0.0553625	0.0933639	-0.124091	0.316881	0.146244	-0.107004	0.334229	0.288954	-0.295674	-0.629903	0.00255734	-0.0452744	0.764368		-0.423885	0.00148102	-0.170637	0.104396		-0.0687283	0.590273	0.148726	0.413554
2.46401	2.30186	2.20517	2.19274	1.98207	2.08175	2.77159	2.77713	2.64411	2.47936	2.29042	2.24354	2.0768	2.16514	2.0764	2.94895	2.94659	3.00586	1.59374	1.75963	1.76237	2.29603	2.22207	2.35681	2.65157	2.9206	2.74246	2.32368	2.08552	2.73094	2.33777	2.10611	2.96713	1.70525	2.29164	2.77154	1.06629	0.000799145	0.586388	0.00211046		0.629359	0.00100472	-0.231663	0.041766		0.407264	0.00616894	-0.238162	0.0735382
2.03164	1.9911	1.96073	2.19054	2.1592	2.28711	1.93275	1.92016	2.04331	2.02766	2.09134	2.10185	2.23345	2.39426	2.2428	2.19092	2.09134	2.17569	2.01135	2.05163	2.02012	2.20272	2.16098	2.06302	1.66524	1.54193	1.55637	1.99449	2.21228	1.96541	2.07362	2.29017	2.15265	2.0277	2.14224	1.58785	-0.439855	0.000876151	0.114539	0.0403111		0.0790296	0.0499448	0.216552	0.022901		-0.0290845	0.596048	0.217793	0.0155649
-0.735166	-1.56748	-0.710691	-1.61836	-3.05502	-1.25997	-0.740787	-2.05034	-1.92358	-1.35953	-1.80868	-1.9558	-2.51046	-2.16089	-1.78138	-1.64172	-1.78791	-1.61071	-1.30315	-2.43796	-1.78841	-1.09443	-0.962625	-0.975574	-1.23661	-1.4839	-1.54563	-1.00445	-1.97778	-1.57157	-1.708	-2.15091	-1.68011	-1.84317	-1.01088	-1.42205	0.421126	0.205524	0.832296	0.0464405		0.0278937	0.943865	-0.442909	0.169129		-0.567122	0.234553	-0.973338	0.187236
-2.35963	-1.93748	-1.91375	-2.08872	-1.82269	-2.24164	-2.94871	-2.87772	-2.86149	-2.05786	-2.32247	-2.64876	-2.52287	-2.55698	-1.75689	-2.62272	-2.61859	-3.24623	-2.58993	-2.62389	-3.40069	-3.26516	-2.79792	-2.28797	-3.63009	-2.98811	-3.24267	-2.07029	-2.05102	-2.89597	-2.34303	-2.27892	-2.82918	-2.8715	-2.78368	-3.28696	-0.415456	0.187862	0.0878169	0.892733		-0.486149	0.0696473	0.0641135	0.904507		-0.825687	0.00346606	0.019271	0.951773
-1.14871	-1.05899	-0.999698	-1.16484	-0.909046	-1.0069	-0.444642	-0.894593	-0.578351	-1.39172	-1.20078	-1.72326	-1.52446	-1.75805	-1.9044	-1.66785	-1.701	-1.82186	-1.41792	-1.21972	-1.46294	-1.25855	-1.94449	-2.03351	-1.24257	-1.23762	-1.1152	-1.06913	-1.02693	-0.639196	-1.43859	-1.72897	-1.73024	-1.36686	-1.74552	-1.19846	0.168398	0.0689308	-0.378657	0.171471		-0.29165	0.0669549	-0.290382	0.182733		0.429935	0.0199024	0.0421999	0.733517
-0.232306	-0.261552	-0.0598109	-0.566966	-0.77049	-0.318897	-0.778613	-0.546309	-0.826138	-0.33097	-0.651629	-0.563959	-0.408568	-0.556119	-0.360684	-0.801122	-0.97082	-1.05051	-0.500748	-0.526287	-0.657272	0.0764983	0.211975	0.586977	-0.110778	-0.41745	-0.18054	-0.184556	-0.552118	-0.71702	-0.515519	-0.44179	-0.940818	-0.561436	0.291816	-0.236256	0.32518	0.0210216	0.853252	0.00674139		-0.425299	0.0108571	0.073729	0.613064		-0.532464	0.00511482	-0.367561	0.0691494
2.73794	2.74017	2.82687	2.6352	2.8207	2.77706	2.334	2.40152	2.41381	2.75218	2.63995	2.79259	2.64141	2.60213	2.58474	2.37058	2.2991	2.38294	2.78797	2.72253	2.61672	2.56929	2.57278	2.39292	2.18817	2.26257	2.30623	2.76832	2.74432	2.38311	2.72824	2.60942	2.35087	2.70907	2.51167	2.25232	-0.456748	0.00240618	-0.197404	0.0449373		-0.377368	0.00148571	-0.118815	0.0667325		-0.385212	0.000790047	-0.0240015	0.804577
2.1074	1.76696	2.08762	2.1321	2.06213	1.89319	2.09287	2.1256	2.09468	1.84487	1.93011	1.8892	1.91284	1.99726	1.64949	2.06529	2.15252	2.0887	2.0569	1.92354	1.91973	1.8284	1.77013	1.49864	1.82098	1.87789	1.97178	1.98732	2.02914	2.10438	1.88806	1.8532	2.10217	1.96672	1.69906	1.89022	-0.0765053	0.211754	-0.267664	0.0514674		0.21411	0.00246614	-0.034862	0.837356		0.11706	0.267496	0.0418138	0.837691
0.417077	0.325316	0.388358	0.455368	0.393017	0.44623	0.279104	0.246252	0.357399	0.352544	0.368177	0.282778	0.422033	0.383334	0.335501	0.464518	0.436516	0.415219	0.292262	0.333534	0.199965	0.459798	0.447943	0.421547	0.208084	0.0907629	0.197318	0.376917	0.431538	0.294251	0.3345	0.380289	0.438751	0.275254	0.443096	0.165388	-0.109866	0.0646069	0.167842	0.012006		0.104251	0.0112254	0.04579	0.262499		-0.0826658	0.0710548	0.0546213	0.174813
2.21798	2.06383	1.8361	1.93898	2.2228	1.92955	1.89603	1.99602	1.68503	1.70187	1.9587	1.76879	1.80963	1.96128	1.67742	1.79642	1.75092	1.57711	1.37597	1.5784	1.2279	1.13124	1.11612	1.39434	1.30325	1.31744	1.30478	2.0393	2.03044	1.85903	1.80979	1.81611	1.70815	1.39409	1.2139	1.30849	-0.0856008	0.42499	-0.180191	0.21781		-0.101637	0.268651	0.00632246	0.973363		-0.180277	0.188474	-0.00886003	0.970656
-0.664087	-0.593339	-0.514676	-1.01654	-0.80573	-0.913705	-0.877689	-0.93518	-1.06658	-0.745943	-0.606477	-0.693034	-0.857971	-0.997322	-0.946348	-0.937317	-0.948179	-0.897955	-0.932482	-0.830533	-0.939192	-0.92628	-0.780969	-0.958879	-0.942145	-0.949462	-0.998797	-0.590701	-0.911991	-0.959817	-0.681818	-0.933881	-0.927817	-0.900735	-0.888709	-0.963468	-0.0627325	0.115783	0.0120265	0.913911		-0.245999	0.0027809	-0.252063	0.016991		-0.369116	0.00429989	-0.32129	0.0213291
0.218737	0.411038	0.346925	0.673186	0.488867	0.546155	1.14497	1.08286	1.2945	0.197182	0.199796	0.162748	0.55394	0.706793	0.712824	1.11624	1.1306	1.19324	0.571786	0.547963	0.504951	0.767936	0.634463	0.813745	0.981734	1.30661	1.21824	0.325567	0.569403	1.17411	0.186575	0.657852	1.14669	0.541567	0.738714	1.16886	0.627294	0.00339238	0.197148	0.0190925		0.960118	0	0.471277	0.00472552		0.848545	0.000791277	0.243836	0.0429899
-0.715868	-0.329254	-0.952321	-0.686344	-0.290198	-0.695008	-0.523346	-0.689405	-0.466258	-0.965587	-0.773948	-0.824465	-0.760227	-0.489017	-0.473947	-0.588551	-0.834287	-0.529624	-0.728884	-1.02883	-1.12567	-0.769274	-0.931993	-0.182163	-0.584749	-1.38359	-0.801311	-0.665814	-0.557183	-0.55967	-0.854667	-0.574397	-0.65082	-0.961128	-0.62781	-0.923218	0.0379099	0.941134	0.333318	0.227101		0.203846	0.0638454	0.28027	0.0584495		0.106144	0.701225	0.108631	0.739048
-0.28553	-0.0669529	-0.208445	0.0850544	0.116161	-0.151966	-0.0268939	-0.154087	-0.294992	-0.418194	-0.595502	-0.445169	-0.043762	0.0137346	-0.0700295	-0.0917697	-0.461231	-0.107579	-0.503428	-0.717464	-0.478187	-0.261931	-0.0967216	-0.11747	0.0736649	0.0916917	-0.175299	-0.186976	0.0164164	-0.158657	-0.486288	-0.0333523	-0.220193	-0.56636	-0.158708	-0.00331418	0.563046	0.00697477	0.407652	0.0099557		0.266095	0.052795	0.452936	0.00456028		0.0283186	0.87773	0.203392	0.124681
2.20681	2.08292	2.15655	2.51122	2.636	2.64683	2.61428	2.59351	2.60128	2.10932	2.10696	2.16454	2.64028	2.67557	2.77071	2.82251	2.7702	2.79425	2.60051	2.60582	2.66635	3.15951	3.1683	3.31314	3.04018	2.84638	2.85254	2.14876	2.59802	2.60302	2.12694	2.69552	2.79566	2.62423	3.21365	2.91303	0.288805	0.00941033	0.589421	0.00149703		0.668718	0.000401674	0.568582	0.00436515		0.454263	0.000380739	0.449256	0.00641104
2.29789	2.27684	2.24182	2.3874	2.3864	2.38066	1.91557	1.92858	2.00685	1.71125	1.75765	1.79977	1.85081	1.88694	1.72623	1.53081	1.47378	1.55627	2.67018	2.63517	2.61005	3.0346	2.95658	2.84904	1.97976	1.9421	1.9883	2.27218	2.38482	1.95033	1.75623	1.82133	1.52028	2.63847	2.94674	1.97005	-0.668418	0	0.30827	0.00653545		-0.235941	0.00191395	0.0651022	0.290928		-0.321852	0.000920328	0.112638	0.00902157
-0.858302	-0.795131	-0.787103	-0.31149	-0.4449	-0.559254	0.606634	0.485594	0.618322	-0.129936	-0.0653281	-0.14433	-0.147117	0.00465989	-0.239072	0.178169	0.169907	0.170702	0.250129	0.111642	-0.032572	-1.12328	-1.26541	-1.16278	-0.0315101	0.298315	0.0489173	-0.813512	-0.438548	0.570183	-0.113198	-0.127176	0.172926	0.109733	-1.18382	0.105241	-0.00449204	0.985654	-1.29355	0		0.286124	0.000343273	-0.0139781	0.913525		1.3837	0	0.374964	0.015535
-0.51808	-0.573853	-0.697918	-0.363237	-0.670877	-0.735613	-0.419652	-0.543854	-0.41269	-0.860952	-0.61488	-0.67125	-0.580921	-0.846959	-0.886792	-0.312468	-0.376454	-0.330616	-0.800884	-0.709957	-0.793634	-0.992728	-0.733766	-0.700257	-0.0825398	-0.00674415	-0.0913644	-0.596617	-0.589909	-0.458732	-0.715694	-0.771558	-0.339846	-0.768158	-0.808917	-0.0602161	0.707942	0.00075841	-0.0407589	0.77968		0.375848	0.0044559	-0.0558638	0.753151		0.137885	0.0635436	0.00670775	0.973846
0.878978	0.764841	0.746123	0.875408	0.779263	0.758195	1.46099	1.5241	1.5032	0.787833	0.853332	0.689494	1.06241	1.13043	1.06399	1.49064	1.49245	1.44101	0.488735	0.475217	0.530377	1.34431	0.925639	1.18838	1.15389	1.26052	1.28312	0.796647	0.804289	1.4961	0.776886	1.08561	1.4747	0.49811	1.15278	1.23251	0.734401	0.000673913	0.654668	0.00669663		0.697811	0.000334956	0.308721	0.00868614		0.699452	0.000416807	0.00764139	0.934982
-0.629278	-0.699215	-0.956897	-0.849478	-0.98764	-0.886052	-0.081485	-0.0841029	-0.240327	-1.02806	-1.18083	-0.844685	-0.877908	-1.19973	-1.16423	-0.149785	-0.219677	-0.258485	-1.45679	-1.2953	-1.46423	-0.947847	-0.795174	-1.21313	-0.603703	-0.683492	-0.646417	-0.761797	-0.907723	-0.135305	-1.01786	-1.08062	-0.209316	-1.40544	-0.985383	-0.644538	0.760905	0.000719424	0.420059	0.0251109		0.808544	0.00123239	-0.0627615	0.763216		0.626492	0.00348445	-0.145926	0.247335
-0.307101	-0.178793	-0.178223	-0.0927763	-0.118855	-0.0376654	-0.0269549	0.00780177	-0.0976064	-0.173332	-0.202711	-0.0327084	-0.08655	-0.12894	-0.224083	-0.076694	-0.060708	-0.110898	-0.178762	-0.21044	-0.199374	-0.483047	-0.54888	-0.508076	-0.115902	-0.0413148	-0.114144	-0.221372	-0.083099	-0.0389198	-0.13625	-0.146525	-0.0827665	-0.196192	-0.513334	-0.0904538	0.105738	0.0110367	-0.317142	0		0.053484	0.278182	-0.010274	0.928413		0.182453	0.0146566	0.138273	0.0541914
-2.03354	-2.08475	-1.79173	-1.38294	-1.2382	-1.55555	-1.99261	-1.62248	-1.95119	-1.33732	-1.61321	-1.40991	-1.41852	-1.48525	-1.17113	-1.24508	-1.26539	-1.08884	-1.76069	-1.37823	-1.80521	-1.79642	-1.62431	-1.47173	-1.38912	-1.49571	-1.27173	-1.97001	-1.39223	-1.85543	-1.45348	-1.3583	-1.19977	-1.64804	-1.63082	-1.38552	0.262522	0.0926451	0.0172264	0.954149		0.253705	0.0279926	0.0951784	0.540145		0.114579	0.473297	0.577777	0.0194632
-2.00901	-1.83492	-2.0558	-1.58843	-1.64456	-1.86239	-1.9364	-2.24695	-2.03631	-2.3847	-2.08137	-2.09072	-2.21911	-1.78379	-2.06739	-2.21224	-2.39577	-2.43605	-2.11677	-2.12126	-2.57127	-2.32255	-2.02701	-2.31568	-2.14183	-2.15862	-2.56822	-1.96657	-1.69846	-2.07322	-2.1856	-2.02343	-2.34802	-2.26977	-2.22175	-2.28956	-0.0197907	0.962229	0.048021	0.870159		-0.16242	0.142006	0.162167	0.377247		-0.106648	0.335728	0.268112	0.0709558
0.858912	0.876616	0.893417	1.05919	1.14632	1.18118	0.867281	0.845799	1.05071	1.20579	1.28113	1.29592	1.3885	1.31444	1.21587	1.29651	1.21804	1.34814	0.827719	0.83919	0.731883	0.466254	0.495057	0.271383	0.28388	0.22406	0.241345	0.876315	1.1289	0.921264	1.26095	1.30627	1.28757	0.799597	0.410898	0.249762	-0.549835	0.000929368	-0.388699	0.00752188		0.0266191	0.693656	0.0453242	0.511139		0.0449489	0.568655	0.252583	0.0095694
-1.57357	-1.0071	-1.73958	-0.94359	-0.910474	-0.848278	-1.05416	-0.929015	-0.844661	-1.35893	-1.19233	-1.39435	-1.41223	-1.22801	-1.16864	-0.709429	-1.09047	-0.641883	-0.823788	-1.59057	-1.48682	-1.18035	-1.16054	-1.13352	-1.62923	-1.27389	-0.918554	-1.44008	-0.900781	-0.942613	-1.3152	-1.26963	-0.813928	-1.30039	-1.15814	-1.27389	0.0265009	0.967721	0.142255	0.65708		0.501274	0.0132251	0.0455747	0.744732		0.49747	0.0527119	0.539302	0.076441
0.928073	0.824669	1.12789	1.21387	1.35905	1.10328	1.372	1.3792	1.25611	1.27221	1.09548	1.03595	0.888648	0.754616	0.797931	0.722923	0.762953	0.796513	1.11195	1.01037	0.962715	0.927024	0.735997	0.820636	1.14344	1.22868	1.19162	0.960212	1.2254	1.33577	1.13455	0.813732	0.760796	1.02834	0.827886	1.18792	0.159572	0.0200638	-0.200457	0.0334077		-0.37375	0.00434526	-0.320815	0.0211384		0.375559	0.0110864	0.265189	0.0852736
1.01422	1.09181	0.901422	1.18389	1.20213	1.24556	1.45816	1.44733	1.50981	1.03812	0.955754	0.957644	1.03073	1.15964	1.13149	1.5901	1.33151	1.32184	1.03929	1.21775	1.28312	1.59171	1.65526	1.466	1.63482	1.68841	1.49673	1.00248	1.21053	1.47177	0.983841	1.10729	1.41448	1.18005	1.57099	1.60665	0.4266	0.00779843	0.390936	0.0110251		0.430643	0.00510477	0.123447	0.0568032		0.469286	0.00147689	0.208045	0.0313218
-1.60486	-1.65647	-1.85806	-1.9468	-2.29878	-1.91592	-2.13491	-2.31797	-2.35214	-1.68667	-1.65021	-1.66503	-2.39091	-2.28358	-2.48251	-2.04969	-2.0484	-1.9559	-1.70288	-1.82251	-1.69803	-2.05855	-1.87154	-2.19574	-2.42662	-2.47195	-2.17358	-1.70646	-2.05383	-2.26834	-1.6673	-2.38567	-2.018	-1.74114	-2.04194	-2.35738	-0.616243	0.00375592	-0.300805	0.0305629		-0.350692	0.000642948	-0.718362	0.00394483		-0.561875	0.00380643	-0.347371	0.0778053
-0.137202	-0.267559	0.02999	0.125392	0.0459051	0.0540776	0.223505	0.321945	0.337744	0.119692	0.19286	0.302314	0.188822	-0.0118358	0.241032	-0.152023	-0.27521	-0.433567	0.346874	0.538838	0.47969	-0.180486	-0.13379	-0.130559	0.4733	0.639188	0.610789	-0.124924	0.0751251	0.294398	0.204955	0.13934	-0.286933	0.455134	-0.148278	0.574426	0.119292	0.1213	-0.603412	0.00125581		-0.491888	0.00422323	-0.0656156	0.57951		0.419322	0.00705207	0.200049	0.0905204
0.266601	0.302533	0.38906	0.487036	0.489911	0.455857	0.386389	0.333656	0.416236	0.34248	0.235132	0.315628	0.54526	0.553033	0.728589	0.612404	0.590075	0.580586	0.417892	0.42958	0.386826	0.882526	0.701735	0.9405	0.850946	0.706127	0.747863	0.319398	0.477601	0.37876	0.297746	0.608961	0.594355	0.411433	0.841587	0.768312	0.356879	0.00191887	0.430154	0.00593309		0.296608	0.000947942	0.311214	0.0157215		0.0593621	0.158405	0.158203	0.0226462
-0.401963	-0.555405	-0.427973	-0.23877	-0.419858	-0.532545	-0.286779	-0.179559	-0.210277	-0.492189	-0.67733	-0.419518	-0.06866	-0.0407088	0.153705	0.266623	0.427951	0.48139	-0.168331	-0.133259	-0.0724795	0.461501	0.29705	0.807816	0.697802	0.453448	0.32711	-0.46178	-0.397057	-0.225538	-0.529679	0.0147789	0.391988	-0.12469	0.522122	0.492787	0.617476	0.00500527	0.646812	0.0112084		0.921667	0.000748707	0.544458	0.0123408		0.236242	0.00899317	0.0647231	0.614476
-0.839524	-0.766516	-1.06138	-1.45868	-0.566224	-0.919082	-1.20848	-1.14128	-0.968598	-1.12425	-0.858387	-0.949228	-0.788636	-1.18594	-0.998122	-0.964288	-0.961536	-0.949249	-1.47154	-1.25514	-1.1063	-0.823501	-1.09774	-0.743259	-1.22214	-1.64649	-1.43255	-0.889139	-0.981327	-1.10612	-0.97729	-0.9909	-0.958358	-1.27766	-0.888167	-1.43373	-0.156064	0.334609	0.389494	0.0433027		0.018932	0.905277	-0.0136098	0.954996		-0.216979	0.0735648	-0.092188	0.82738
-0.643089	-0.73009	-0.501278	-0.491667	-0.396142	-0.517513	-0.843614	-0.936519	-0.784786	-0.551687	-0.64108	-0.613732	-0.417357	-0.405596	-0.22408	-0.825316	-0.824785	-0.80404	-0.47259	-0.447801	-0.330939	-0.267252	-0.449008	-0.390273	-0.555266	-0.308177	-0.372323	-0.624819	-0.468441	-0.854973	-0.602166	-0.349011	-0.818047	-0.41711	-0.368845	-0.411922	0.00518823	0.976042	0.0482653	0.573516		-0.215881	0.00122969	0.253155	0.0241614		-0.230154	0.024067	0.156378	0.108595
0.373305	0.390126	0.430905	0.509673	0.499864	0.465896	0.352702	0.349974	0.330048	0.440782	0.355564	0.419108	0.603923	0.548572	0.686855	0.465006	0.414865	0.41881	0.404022	0.452008	0.466294	0.762386	0.658729	0.90233	0.658219	0.64474	0.587304	0.398112	0.491811	0.344242	0.405151	0.613117	0.432893	0.440775	0.774482	0.630088	0.189313	0.00310955	0.333707	0.00908163		0.0277422	0.319665	0.207965	0.0170989		-0.0538702	0.023673	0.0936991	0.0209262
0.198869	0.274161	0.360665	0.617007	0.684878	0.579546	0.507293	0.50715	0.46734	0.443884	0.410009	0.336394	0.716151	0.698212	0.807939	0.786225	0.761744	0.738732	0.16235	0.237528	0.240965	0.485153	0.356315	0.435266	0.755666	0.784258	0.718472	0.277898	0.627144	0.493928	0.396762	0.740768	0.762234	0.213614	0.425578	0.752799	0.539184	0.000664879	0.211964	0.00835536		0.365472	0.000633688	0.344005	0.00488098		0.21603	0.007255	0.349246	0.0109952
1.03848	0.905882	0.91246	0.10124	-0.404412	-0.0970411	0.599344	0.597561	0.585428	0.890969	0.798386	0.901103	-0.0368445	-0.0970008	-0.085253	0.269098	0.172047	0.298882	1.13064	1.0037	0.976319	0.675958	0.539214	0.460708	0.447039	0.475931	0.542008	0.952274	-0.133404	0.594111	0.863486	-0.0730328	0.246676	1.03689	0.558627	0.488326	-0.54856	0.000978417	-0.478259	0.0056375		-0.61681	0.000273016	-0.936519	0.00476923		-0.358164	0.00141492	-1.08568	0.00866749
-1.53556	-1.33905	-1.38133	-1.26859	-1.31357	-1.40625	-1.89176	-2.03804	-1.66652	-1.38626	-1.36176	-1.71373	-1.36707	-1.3646	-1.44502	-2.05384	-1.8813	-1.76761	-0.623988	-0.677409	-0.937199	-1.79265	-1.25905	-1.62372	-1.02014	-0.800898	-1.09084	-1.41865	-1.32947	-1.86544	-1.48725	-1.39223	-1.90092	-0.746199	-1.55848	-0.970625	-0.224426	0.0961616	-0.812278	0.0102256		-0.413667	0.0184763	0.0950213	0.494262		-0.446791	0.0127741	0.089178	0.288488
-0.667425	-0.672937	-0.539671	-0.507509	-0.464462	-0.395679	-0.207784	-0.229474	-0.153049	-0.545084	-0.540643	-0.432599	-0.341851	-0.301272	-0.467657	-0.0669899	-0.101895	-0.0292411	-0.425052	-0.498845	-0.437783	-0.705168	-0.479939	-0.653247	-0.39581	-0.450646	-0.30657	-0.626677	-0.455884	-0.196769	-0.506109	-0.37026	-0.0660421	-0.453893	-0.612785	-0.384342	0.0695514	0.141766	-0.158891	0.0647243		0.440066	0.000675643	0.135849	0.0863327		0.429908	0.00112272	0.170794	0.0418456
0.105492	0.234138	0.247983	0.447836	0.387221	0.228323	-0.0270836	-0.0614593	0.115522	0.259518	0.220245	0.25034	0.511176	0.528758	0.717914	0.181102	0.1087	0.203142	0.485365	0.428949	0.575346	1.1323	0.928329	1.27379	0.632145	0.717163	0.476253	0.195871	0.35446	0.00899307	0.243368	0.585949	0.164315	0.496553	1.11147	0.60852	0.111967	0.164935	0.61492	0.00609503		-0.0790531	0.0276807	0.342582	0.0131198		-0.186878	0.0305882	0.158589	0.1153
1.20426	1.13175	1.02705	0.770115	0.517268	0.608889	0.561653	0.435446	0.524807	1.11139	1.15959	1.202	0.697401	0.822418	0.701926	0.701229	0.659237	0.648863	1.20523	1.14443	1.2658	1.27427	1.23074	1.42599	0.887342	1.02758	0.857131	1.12102	0.632091	0.507302	1.15766	0.740582	0.669776	1.20515	1.31033	0.924017	-0.281135	0.00875686	0.105182	0.159152		-0.487883	0.000274314	-0.417078	0.00458595		-0.613719	0.000990559	-0.48893	0.0130075
-0.973858	-0.98016	-1.17885	-1.21042	-1.28035	-1.41444	-0.875272	-0.739433	-0.663237	-1.02621	-0.908385	-0.948605	-1.3792	-1.39949	-1.44074	-0.504063	-0.409537	-0.54014	-1.16649	-1.18131	-1.15718	-0.782546	-0.715141	-0.80536	-0.850129	-1.08447	-0.871838	-1.04429	-1.30174	-0.759314	-0.961067	-1.40648	-0.48458	-1.16833	-0.767682	-0.935479	0.232851	0.0211657	0.400648	0		0.476487	0.00079096	-0.445411	0.00356322		0.284976	0.0190883	-0.257447	0.0522674
-0.965832	-0.957432	-1.04292	-0.848992	-0.807521	-0.650787	-0.723525	-0.539842	-0.586332	-1.15202	-1.25762	-0.800629	-0.871125	-0.61836	-0.843152	-0.841405	-0.805989	-0.718099	-0.844686	-1.05061	-0.923331	-0.729637	-1.08222	-0.866422	-0.808132	-0.844721	-0.832779	-0.988727	-0.7691	-0.616567	-1.07009	-0.777546	-0.788498	-0.939543	-0.892761	-0.828544	0.110999	0.083263	0.0467825	0.79759		0.281592	0.0553871	0.292544	0.127571		0.372161	0.00277595	0.219627	0.0373174
-0.41537	-0.598626	-0.27428	-0.5913	-0.412	-0.451047	-1.02058	-0.731373	-0.88746	-0.877307	-0.822852	-1.07217	-1.07697	-0.905155	-0.837708	-1.37159	-0.805256	-1.07677	-1.79702	-1.40676	-0.925285	-0.642733	-0.948092	-0.975307	-1.23183	-1.20201	-0.90248	-0.429425	-0.484782	-0.879805	-0.92411	-0.939945	-1.08454	-1.37635	-0.855378	-1.11211	0.264247	0.332277	0.520977	0.0959588		-0.160431	0.340878	-0.0158346	0.929611		-0.450379	0.0131705	-0.0553567	0.7185
0.142215	0.329104	0.261053	0.381776	0.252228	0.182839	0.188606	0.210213	0.235353	0.218006	0.244275	0.126976	0.2347	0.149611	0.348777	0.12159	0.125966	0.14951	0.0130589	0.160306	0.117029	0.119172	-0.0458307	0.0703273	0.0100954	0.197634	0.102249	0.244124	0.272281	0.211391	0.196419	0.244363	0.132356	0.0967979	0.0478896	0.103326	0.0065283	0.963183	-0.0489082	0.538823		-0.0640634	0.0744524	0.0479437	0.574169		-0.0327336	0.674166	0.0281567	0.818276
-1.87244	-1.65518	-1.56612	-1.72643	-1.53813	-1.58696	-1.2787	-1.13142	-1.07433	-1.67766	-1.80596	-1.64128	-1.62251	-1.77789	-1.74597	-1.03378	-0.862844	-0.915905	-1.77958	-1.81006	-1.56888	-1.34303	-1.1794	-1.56466	-1.24676	-1.44079	-1.29615	-1.69791	-1.61718	-1.16148	-1.7083	-1.71546	-0.93751	-1.71951	-1.36236	-1.3279	0.391607	0.0108176	0.357143	0.0406552		0.770789	0.00059085	-0.00715661	0.952893		0.536428	0.00527757	0.080734	0.548372
0.0990031	-0.0238416	0.340346	0.479942	0.50699	0.598907	0.987731	1.26489	1.00589	0.151988	0.180938	0.414208	0.576985	0.918838	0.86072	1.37707	1.21179	1.29362	0.577308	0.655453	0.545811	0.343024	0.194901	0.418935	1.03458	0.969473	0.90014	0.138502	0.528613	1.08617	0.249045	0.785515	1.29416	0.592857	0.318953	0.968065	0.375207	0.00248661	-0.273904	0.0149808		1.04512	0.00059552	0.53647	0.0208455		0.94767	0.00213742	0.390111	0.03376
-1.21119	-1.24785	-1.19715	-1.14721	-1.2174	-1.00284	-0.979758	-0.861576	-0.764724	-1.11888	-1.17282	-1.32932	-1.03878	-1.06392	-1.31936	-0.964691	-0.971416	-0.886753	-1.15916	-1.18278	-1.25252	-1.22	-1.02576	-1.20408	-1.01364	-0.903074	-1.02194	-1.21873	-1.12249	-0.868686	-1.20701	-1.14069	-0.940953	-1.19815	-1.14995	-0.97955	0.218602	0.00782177	0.0482014	0.568314		0.266055	0.00863411	0.0663203	0.650915		0.350045	0.00380221	0.0962454	0.21128
1.29009	1.49413	1.27642	1.60708	1.38761	1.2917	1.36423	1.41715	1.16426	1.1979	1.06589	1.08635	1.56509	0.979544	1.32996	1.22096	1.49162	1.30888	0.503726	0.525681	0.583935	0.891367	0.735796	0.893364	1.53654	1.70633	1.40016	1.35355	1.4288	1.31521	1.11672	1.29153	1.34049	0.537781	0.840176	1.54767	1.00989	0.000794899	0.302395	0.00679131		0.22377	0.0293672	0.174813	0.378719		-0.0383336	0.830948	0.0752499	0.626957
-1.26212	-1.29399	-1.1615	-0.645194	-0.669131	-0.826256	0.269974	0.255634	0.137181	-1.12635	-1.00829	-1.28105	-1.06101	-0.893416	-1.3174	-0.0317659	-0.331588	-0.372391	-0.393775	-0.643337	-0.846055	-1.02276	-1.34834	-1.42048	-0.0137975	-0.292814	-0.0241613	-1.23921	-0.713527	0.22093	-1.13856	-1.09061	-0.245248	-0.627722	-1.26386	-0.110257	0.517465	0.0190335	-0.636138	0.0172586		0.893315	0.00183008	0.0479542	0.836351		1.46014	0	0.525679	0.00648122
1.58836	1.45634	1.42615	1.4045	1.45903	1.57048	1.81608	1.63392	1.80241	0.0190942	0.746872	0.338331	0.29454	0.093086	-0.352481	0.925007	0.930593	1.36879	-0.947416	-0.486033	-0.30877	0.487747	0.620262	0.587115	0.412995	0.0899265	0.44601	1.49029	1.47801	1.75081	0.368099	0.011715	1.0748	-0.58074	0.565041	0.31631	0.89705	0.0110314	1.14578	0.00594375		0.706697	0.0226461	-0.356384	0.265823		0.260521	0.0152914	-0.0122805	0.915453
0.657364	0.624294	0.552739	0.714382	0.822935	0.894278	0.634156	0.421783	0.59834	0.214476	0.390337	0.317321	0.72538	0.528167	0.477273	0.50336	0.335388	0.434947	0.184836	0.251249	0.243171	0.065367	-0.0470381	0.0151305	0.06972	-0.0137937	0.109944	0.611466	0.810532	0.551426	0.307378	0.57694	0.424565	0.226419	0.0111531	0.0552901	-0.171129	0.0108697	-0.215266	0.00622027		0.117187	0.084418	0.269562	0.0423325		-0.0600395	0.421536	0.199066	0.038411
1.44825	1.53473	1.42265	1.75283	1.67974	1.6382	1.75496	1.67131	1.73669	1.4736	1.39399	1.27745	1.86367	1.72136	1.92793	1.75557	1.7739	1.63322	1.34306	1.49972	1.42227	2.10087	1.9996	1.87237	1.84286	1.93597	1.82342	1.46854	1.69026	1.72099	1.38168	1.83765	1.72089	1.42168	1.99095	1.86742	0.445732	0.00186483	0.569264	0.0031759		0.339213	0.00498639	0.455973	0.010933		0.252442	0.00287006	0.221711	0.0177254
-0.0273826	0.0275886	0.0122254	-0.0718861	0.125574	0.106361	0.0360663	0.125679	0.0243633	-0.0301359	-0.064065	0.0109527	0.136126	0.160704	0.0335114	0.0408778	0.0281143	0.161413	0.139037	0.0914915	0.0610173	-0.279954	-0.128311	-0.219418	-0.124944	-0.200881	-0.125263	0.00414379	0.0533497	0.0620361	-0.0277494	0.110114	0.0768018	0.097182	-0.209228	-0.150363	-0.247545	0.00250172	-0.30641	0.00551671		0.104551	0.0415852	0.137863	0.0381019		0.0578923	0.108431	0.0492059	0.54641
-2.26993	-1.77559	-1.39096	-1.64903	-1.85788	-1.71005	-0.729466	-0.727988	-0.734373	-1.33682	-1.47338	-1.68775	-1.6615	-1.3108	-1.46488	-0.739547	-0.612728	-0.463025	-1.65952	-1.81735	-1.65937	-2.24955	-2.06774	-2.90247	-0.618519	-0.896663	-0.790341	-1.81216	-1.73899	-0.730609	-1.49932	-1.47906	-0.6051	-1.71208	-2.40659	-0.768508	0.943572	0.000945265	-0.694508	0.0390696		0.894217	0.00155916	0.0202579	0.935196		1.08155	0.00819296	0.0731765	0.862616
-3.42974	-2.56646	-2.76544	-2.85941	-2.60509	-2.35636	-2.36287	-2.60594	-2.73314	-3.0603	-2.8766	-2.59556	-2.93432	-2.88554	-2.93542	-2.19207	-2.6639	-2.13162	-2.90975	-2.54915	-2.77046	-3.13555	-2.9595	-2.58514	-2.3145	-2.94558	-2.21217	-2.92055	-2.60695	-2.56731	-2.84415	-2.91842	-2.3292	-2.74312	-2.8934	-2.49075	0.252368	0.311197	-0.150279	0.514095		0.514956	0.0329428	-0.074273	0.694713		0.353237	0.189597	0.313595	0.36864
1.65002	1.61684	1.66475	1.60332	1.28884	1.1541	1.19092	0.993241	1.22256	1.85265	1.80161	1.99949	1.79739	1.7777	1.61267	1.49624	1.47634	1.60978	1.87016	2.02431	2.09675	1.92217	1.97435	1.86625	1.70835	1.93866	1.71271	1.64387	1.34875	1.13557	1.88458	1.72926	1.52745	1.99707	1.92092	1.78657	-0.210504	0.0599654	-0.076152	0.345641		-0.357127	0.00445034	-0.155326	0.12294		-0.508294	0.0021406	-0.295116	0.0925713
3.08699	3.16923	3.07377	2.91166	2.96891	2.90261	2.52887	2.51701	2.52046	3.07727	3.05205	3.17095	3.03664	2.86643	2.85328	2.50558	2.54505	2.57526	3.00192	2.92165	2.83838	2.7157	2.72448	2.52089	2.40252	2.4056	2.57975	3.11	2.92773	2.52211	3.10009	2.91879	2.54196	2.92065	2.65369	2.46262	-0.458023	0.00367518	-0.266958	0.0224446		-0.558128	0.000319703	-0.181304	0.0556096		-0.587886	0	-0.182269	0.0154096
2.27799	2.15034	2.33708	2.08441	2.27035	2.21976	1.67857	1.75045	1.62538	2.25992	2.13149	2.39699	2.28101	2.12473	1.96868	1.66592	1.78992	1.76506	2.14237	2.11803	2.29302	1.80453	1.89774	1.66109	1.86452	1.9337	1.98146	2.25513	2.19151	1.6848	2.2628	2.12481	1.7403	2.18447	1.78778	1.92656	-0.257916	0.0111333	-0.396691	0.00962108		-0.522503	0.00246761	-0.137996	0.297991		-0.570333	0.0012302	-0.0636261	0.508383
-0.791549	-0.734426	-0.749285	-0.482682	-0.595979	-0.556066	-0.433345	-0.348526	-0.377687	-0.692239	-0.765983	-0.813929	-0.49561	-0.472089	-0.40281	-0.30041	-0.341917	-0.265967	-0.758971	-0.718337	-0.683136	-0.259958	-0.365567	-0.17239	-0.330265	-0.463329	-0.464451	-0.75842	-0.544909	-0.386519	-0.757383	-0.456836	-0.302765	-0.720148	-0.265972	-0.419348	0.300799	0.00377889	0.454176	0.00251231		0.454619	0.000595128	0.300547	0.0069935		0.371901	0.000371991	0.213511	0.0118743
0.86178	0.969133	0.970023	0.807298	0.937724	0.88107	0.546628	0.542097	0.579386	1.22786	1.27275	1.2818	1.21669	1.03643	1.05231	0.890495	0.88201	0.811333	1.1798	1.23504	1.17629	0.409104	0.549147	0.354356	0.639776	0.71966	0.776172	0.933645	0.875364	0.556037	1.2608	1.10181	0.861279	1.19705	0.437536	0.711869	-0.485178	0.000803437	-0.759511	0.000572917		-0.399525	0.000311594	-0.158993	0.0540244		-0.377608	0.00078214	-0.0582817	0.335662
0.492964	0.44108	0.360537	0.453281	0.544778	0.556815	0.176832	0.0992463	0.0329678	-0.0797074	0.131907	0.116398	0.166901	-0.0336773	0.0366948	-0.0470295	-0.0669708	-0.443254	0.458017	0.384975	0.429134	0.291427	0.365051	0.157446	-0.319708	-0.183515	-0.183951	0.431527	0.518291	0.103016	0.0561989	0.0566396	-0.185752	0.424042	0.271308	-0.229058	-0.6531	0.00075643	-0.152734	0.053215		-0.241951	0.0845034	0.000440677	0.996734		-0.328511	0.00311146	0.0867646	0.158448
0.60373	0.699322	0.662323	0.530386	0.885677	0.869398	0.608969	0.63373	0.417351	0.728529	0.833766	0.853086	0.895839	0.85262	0.959832	0.694478	0.704223	0.705003	0.704558	0.614702	0.561315	0.459047	0.524399	0.369243	0.321647	0.189784	0.344955	0.655125	0.76182	0.55335	0.805127	0.902764	0.701234	0.626858	0.450897	0.285462	-0.341396	0.00517878	-0.175962	0.0327211		-0.103892	0.0244909	0.0976368	0.110561		-0.101775	0.154157	0.106695	0.453936
-0.696388	-0.737159	-0.768174	-0.843542	-0.85923	-0.91799	-0.977569	-0.989093	-0.994772	-0.896399	-1.01569	-0.995845	-0.966268	-0.932022	-0.865732	-1.12792	-1.0512	-0.938493	-0.959294	-0.931552	-0.824666	-0.775069	-0.879349	-0.742744	-1.0077	-0.991711	-1.01906	-0.733907	-0.873587	-0.987145	-0.969312	-0.921341	-1.0392	-0.905171	-0.799054	-1.00616	-0.100985	0.0406037	0.106116	0.105935		-0.0698921	0.239117	0.0479713	0.370246		-0.253237	0.00034413	-0.13968	0.0189317
0.287472	0.0597022	0.233113	-0.209101	-0.487672	-0.204987	0.0853455	-0.159186	-0.110218	0.375616	0.307847	0.144185	-0.503329	-0.0440361	-0.0108583	0.345112	-0.00926828	0.133332	0.0741336	-0.136197	-0.0591285	-0.458597	-0.482836	-0.481247	-0.11776	-0.0228779	0.143144	0.193429	-0.300587	-0.0613528	0.275883	-0.186074	0.156392	-0.0403974	-0.474227	0.000835419	0.0412328	0.792845	-0.433829	0.00334234		-0.119491	0.288086	-0.461957	0.0533582		-0.254782	0.0350197	-0.494016	0.0218075
-0.705091	-0.768357	-0.580587	-0.208988	-0.352519	-0.234602	-0.559473	-0.659037	-0.561195	-0.46734	-0.434378	-0.567931	-0.402021	-0.116492	-0.185152	-0.635137	-0.444158	-0.436376	-0.335206	-0.212309	-0.190907	-0.194214	-0.25054	-0.0308156	-0.457127	-0.431743	-0.414401	-0.684678	-0.26537	-0.593235	-0.489883	-0.234555	-0.505223	-0.24614	-0.158523	-0.434424	-0.188283	0.0110258	0.0876174	0.310394		-0.0153403	0.922889	0.255328	0.0525578		0.0914432	0.143628	0.419308	0.0115426
-1.26126	-1.0389	-0.719461	-0.535748	-0.662687	-0.4428	-0.307344	-0.35688	-0.503567	-1.35392	-1.02815	-0.855828	-1.42961	-0.661932	-0.545325	-0.429121	-0.0914664	-0.631506	-0.750582	-0.376667	-0.663998	-1.28441	-0.818811	-0.38476	-0.0809853	-0.193577	0.0820889	-1.00654	-0.547079	-0.389264	-1.0793	-0.878954	-0.384031	-0.597082	-0.829328	-0.0641576	0.532924	0.0124437	-0.232246	0.483481		0.695268	0.0136854	0.200345	0.625162		0.617275	0.0124534	0.45946	0.0596596
1.2938	1.38492	1.31098	0.307694	0.370496	0.524329	0.503178	0.433883	0.476516	1.36138	1.3912	1.49934	-0.196158	-0.188308	-0.176096	0.0194187	-0.00353718	0.0869441	1.37323	1.31965	1.36095	-0.0857918	0.084332	-0.106616	0.101125	0.0686467	0.189814	1.3299	0.40084	0.471192	1.41731	-0.186854	0.0342752	1.35128	-0.0360254	0.119862	-1.23141	0	-1.3873	0		-1.38303	0.0004	-1.60416	0		-0.858706	0	-0.929058	0.00651429
-0.700036	-0.719486	-0.686226	-0.440226	-0.573953	-0.445322	-0.525364	-0.518296	-0.51953	-0.657343	-0.46023	-0.555879	-0.606784	-0.385897	-0.550518	-0.398904	-0.418748	-0.286064	-0.572896	-0.510088	-0.520321	-0.553813	-0.471982	-0.636379	-0.554057	-0.548405	-0.447614	-0.701916	-0.4865	-0.521063	-0.557817	-0.5144	-0.367905	-0.534435	-0.554058	-0.516692	0.0177426	0.775298	-0.019623	0.804245		0.189912	0.0239009	0.0434175	0.730494		0.180853	0	0.215416	0.0168724
-0.519828	-0.521597	-0.577792	-0.167172	0.10141	-0.181342	1.1552	1.12581	1.21784	-1.06312	-0.942653	-0.990826	0.0448258	-0.0759356	-0.0722215	1.24929	1.32854	1.37022	-0.519148	-0.471814	-0.481233	0.107475	-0.209783	-0.205788	0.592292	0.748131	0.67646	-0.539739	-0.0823677	1.16628	-0.998867	-0.0344438	1.31602	-0.490732	-0.102699	0.672294	1.16303	0	0.388033	0.0155625		2.31489	0	0.964423	0.00272527		1.70602	0	0.457371	0.0164121
-0.877253	-0.562531	-0.941021	-0.45778	-0.41355	-0.115666	-0.00796866	0.124755	-0.202467	-1.0098	-0.958846	-0.976346	-0.0755231	-0.42726	-0.0698841	-0.0726366	-0.0443292	-0.157989	-1.83311	-1.49414	-1.97772	-1.18555	-1.35373	-0.769448	-0.340701	-0.2204	-0.568862	-0.793602	-0.328999	-0.0285604	-0.981666	-0.190889	-0.0916514	-1.76833	-1.10291	-0.376654	1.39167	0.00190415	0.665417	0.0297703		0.890014	0.000277457	0.790777	0.00723318		0.765042	0.00480499	0.464603	0.0493751
0.111135	0.147691	0.125219	0.250558	0.111622	0.0563498	-0.38189	-0.462817	-0.216915	-0.0898664	0.0496621	0.0359414	0.038172	0.0479486	0.197688	-0.349108	-0.24208	-0.246796	-0.18735	-0.0948012	-0.217146	-0.0296161	-0.126623	0.0117168	-0.285505	-0.243606	-0.428185	0.128015	0.13951	-0.353874	-0.00142097	0.0946028	-0.279328	-0.166432	-0.048174	-0.319099	-0.152666	0.0467235	0.118258	0.0704146		-0.277907	0.00447031	0.0960238	0.217421		-0.481889	0.00211585	0.0114952	0.906075
-0.435229	-0.282993	-0.466035	-0.4788	-0.489311	-0.596379	-0.710927	-0.680194	-0.49062	-0.578972	-0.702148	-0.55393	-0.615575	-1.01835	-0.725177	-0.653815	-0.618598	-0.646796	-1.2126	-1.39707	-1.19693	-1.49534	-1.71898	-1.96994	-1.78959	-1.45634	-1.43016	-0.394752	-0.521497	-0.627247	-0.611683	-0.786369	-0.639736	-1.26887	-1.72809	-1.5587	-0.289831	0.0522766	-0.45922	0.0274239		-0.0280531	0.663157	-0.174685	0.233145		-0.232495	0.0317345	-0.126745	0.133235
0.390017	0.216175	0.176399	0.10982	0.249393	0.207778	0.418662	0.436134	0.473269	0.321044	0.371062	0.296667	0.233477	0.21289	0.189829	0.50143	0.557858	0.569044	0.128392	0.0402095	0.0739415	0.157861	0.214074	0.121513	0.245849	0.102218	0.16124	0.260864	0.188997	0.442689	0.329591	0.212065	0.542777	0.0808477	0.164482	0.169769	0.0889213	0.0838142	0.0836347	0.0621841		0.213186	0.00149388	-0.117526	0.015276		0.181825	0.0292108	-0.0718671	0.435179
0.199956	0.234609	0.16292	-0.0264463	0.0461173	0.133577	0.143124	0.244371	0.234487	-0.0678589	-0.176095	-0.00259757	-0.00716186	-0.0731008	-0.192274	0.327329	0.390377	0.413	0.176554	0.198881	0.176138	0.177486	0.280541	0.143013	0.00551677	-0.123511	-0.138789	0.199162	0.0510826	0.207327	-0.082184	-0.0908457	0.376902	0.183858	0.200347	-0.0855945	-0.269452	0.00439324	0.0164889	0.798085		0.459086	0.00111011	-0.00866167	0.946478		0.00816568	0.910052	-0.148079	0.0495245
0.0254047	-0.107525	-0.0447352	-0.0388417	0.0434747	0.116186	0.0752761	0.110236	0.0249169	-0.173393	-0.390019	-0.280878	-0.0334914	0.110045	-0.105151	0.0411119	0.0883098	0.075624	-0.226066	-0.364126	-0.261245	-0.151476	-0.175128	-0.126105	-0.113016	-0.262637	-0.195334	-0.042285	0.0402729	0.0701431	-0.28143	-0.00953253	0.0683486	-0.283812	-0.150903	-0.190329	0.0934832	0.121264	0.132909	0.0273059		0.349778	0.00327226	0.271897	0.0393583		0.112428	0.0372657	0.0825579	0.233966
2.16761	2.24694	2.44486	2.12862	2.30963	2.36721	2.36555	2.31873	2.37107	1.98357	2.06615	2.08157	1.89669	1.62189	1.3792	2.07305	1.9854	2.23146	2.02681	1.99206	1.786	1.50911	1.49684	1.16296	1.79325	1.7358	1.93557	2.28647	2.26849	2.35178	2.04376	1.63259	2.09664	1.93496	1.38964	1.82154	-0.113414	0.223552	-0.545316	0.0129046		0.0528744	0.56963	-0.411168	0.0521558		0.0653114	0.471044	-0.0179861	0.922331
-1.08568	-1.30922	-1.21564	-1.56631	-1.64058	-1.8724	-2.0893	-2.10002	-1.75107	-1.11429	-1.2679	-1.3294	-1.43804	-1.39976	-1.30693	-1.99905	-2.05134	-1.77102	-1.86708	-1.86549	-1.77052	-1.01887	-1.08399	-0.953527	-1.56106	-1.60228	-1.80706	-1.20351	-1.69309	-1.98013	-1.2372	-1.38158	-1.94047	-1.83436	-1.0188	-1.6568	0.17756	0.0547701	0.815566	0		-0.703275	0.0020022	-0.14438	0.114996		-0.776616	0.00288402	-0.48958	0.0209608
2.15786	2.24058	2.28129	2.31512	2.35785	2.39197	2.5287	2.57044	2.51711	1.83716	1.86456	1.78918	1.78223	1.66617	1.65782	2.20058	2.28585	2.1781	2.00246	2.07975	1.98109	1.88963	1.78716	1.77573	2.1046	2.0954	2.27035	2.22658	2.35498	2.53875	1.8303	1.70207	2.22151	2.0211	1.81751	2.15678	0.135683	0.0575488	-0.203592	0.0104878		0.39121	0.00068942	-0.128228	0.0478852		0.312172	0.00151907	0.128406	0.0455741
1.45656	1.40737	1.38645	1.5931	1.36519	1.35005	1.9952	2.06952	2.06985	1.35777	1.13164	1.02138	1.17361	1.30916	1.26774	2.18695	2.02496	2.03703	0.854345	0.93952	0.812373	1.72612	1.49702	1.83232	1.93298	1.92389	1.82574	1.41679	1.43612	2.04486	1.17026	1.25017	2.08298	0.868746	1.68515	1.8942	1.02546	0.000525424	0.816405	0.00248536		0.91272	0.0011238	0.0799054	0.543816		0.628066	0	0.019323	0.883838
-0.156696	-0.0300176	-0.0407712	0.117315	0.171614	0.196547	0.0330622	0.10662	0.028249	-0.744355	-0.75725	-0.731027	-0.683005	-0.689285	-0.553206	-0.867157	-0.916558	-0.853153	-0.0830858	-0.02472	-0.0350602	0.14635	0.00647497	0.0103064	0.125911	0.0400231	0.0551987	-0.0758282	0.161825	0.0559769	-0.744211	-0.641832	-0.878956	-0.047622	0.0543772	0.0737108	0.121333	0.0126461	0.101999	0.0775717		-0.134745	0.00199051	0.102379	0.0796768		0.131805	0.0273363	0.237654	0.0154173
-0.170549	-0.309671	-0.29093	-0.256498	-0.0517426	-0.0827179	-0.383143	-0.315829	-0.339015	-0.32654	-0.312104	-0.345343	-0.365122	-0.320641	-0.427082	-0.311994	-0.307247	-0.361744	-0.379369	-0.654595	-0.532747	-0.856169	-0.565166	-0.543365	-0.375601	-0.656218	-0.681053	-0.25705	-0.13032	-0.345995	-0.327996	-0.370948	-0.326995	-0.522237	-0.6549	-0.570958	-0.0487206	0.816158	-0.132663	0.345619		0.00100088	0.982464	-0.0429523	0.241295		-0.0889454	0.078058	0.12673	0.174222
-2.56999	-2.49782	-2.43219	-2.38314	-2.72567	-2.36093	-3.02569	-3.27669	-2.83419	-2.27412	-2.28398	-2.01566	-2.05785	-2.2078	-2.60869	-2.76221	-2.74165	-2.33769	-3.05621	-2.92937	-2.49316	-3.72301	-2.92307	-2.56433	-2.4261	-2.54082	-2.4226	-2.5	-2.48992	-3.04552	-2.19125	-2.29144	-2.61385	-2.82625	-3.07014	-2.46318	0.363071	0.0602229	-0.243891	0.619873		-0.4226	0.0271703	-0.100193	0.700919		-0.545526	0.00962058	0.0100814	0.961644
-1.24727	-1.22151	-1.06617	-1.1237	-1.1761	-1.11573	-1.05027	-1.02308	-0.95168	-1.19043	-1.27395	-1.12279	-1.06834	-1.00143	-1.20938	-1.12164	-1.05675	-1.02134	-1.39286	-1.40244	-1.21896	-1.68404	-1.43925	-1.66272	-1.22639	-1.20645	-1.17583	-1.17832	-1.13851	-1.00834	-1.19572	-1.09305	-1.06658	-1.33809	-1.59534	-1.20289	0.135198	0.0511998	-0.257251	0.0418382		0.129147	0.0306591	0.102675	0.231102		0.169978	0.0299664	0.0398118	0.610116
-1.31991	-1.06179	-1.16553	-1.937	-1.71099	-1.21369	-1.14276	-0.95286	-1.38904	-1.08002	-1.51091	-1.55546	-1.5177	-1.29121	-1.28518	-0.951507	-0.859222	-0.747777	-1.29802	-1.45847	-0.930364	-1.85597	-1.43747	-1.46657	-1.11003	-0.460697	-0.77507	-1.18241	-1.62056	-1.16155	-1.38213	-1.3647	-0.852835	-1.22895	-1.58667	-0.781931	0.447021	0.0819391	-0.357716	0.119197		0.529295	0.0134835	0.0174313	0.952665		0.0208594	0.941074	-0.438148	0.121879
2.18465	2.38389	2.27088	2.22431	2.19864	2.06225	1.81514	1.94635	1.92644	2.48994	2.42146	2.47539	2.41543	2.14805	2.39992	1.93519	1.95302	1.85945	1.86317	2.00462	1.95476	2.01151	1.96654	2.12724	2.04412	2.28887	2.05798	2.27981	2.16174	1.89598	2.46226	2.32113	1.91589	1.94085	2.0351	2.13032	0.189473	0.0572596	0.0942467	0.168894		-0.546375	0.000256112	-0.141127	0.172573		-0.383831	0.00382092	-0.118073	0.19504
-1.2784	-1.02671	-1.36511	-1.02522	-0.916409	-0.844246	-1.08219	-1.06831	-1.43745	-1.37405	-1.59458	-1.33045	-1.01464	-1.30461	-1.50136	-1.3142	-1.13501	-1.16561	-1.31257	-1.19368	-1.35687	-1.16781	-1.00671	-1.2937	-1.44478	-1.41917	-1.65139	-1.22341	-0.928626	-1.19598	-1.43303	-1.27354	-1.20494	-1.2877	-1.15607	-1.50512	-0.217413	0.0385914	0.13163	0.204206		0.228088	0.0360567	0.159492	0.390676		0.0274243	0.927492	0.294781	0.0665352
-0.869053	-0.805422	-0.760069	-0.12031	-0.253161	-0.232584	0.361655	0.351888	0.352768	-0.988052	-0.829981	-1.07616	-0.556713	-0.615015	-0.455395	0.256698	0.345057	0.242782	-0.894546	-0.934306	-0.739632	-0.139928	-0.433469	-0.195359	0.294372	0.357153	0.300031	-0.811514	-0.202019	0.355437	-0.96473	-0.542374	0.281512	-0.856162	-0.256252	0.317185	1.17335	0.000849315	0.599909	0.00620667		1.24624	0.000271605	0.422356	0.0137889		1.16695	0	0.609496	0.00618333
1.72106	1.83959	1.7475	1.46744	1.65808	1.61655	1.10761	1.16474	1.11258	1.93691	1.95153	1.99885	1.75143	1.56767	1.55163	1.24134	1.27332	1.24844	1.86101	1.9539	1.86772	1.1326	1.38451	1.12185	1.08614	1.11265	1.12247	1.76939	1.58069	1.12831	1.96243	1.62358	1.25436	1.89421	1.21298	1.10709	-0.787123	0	-0.681224	0.00266667		-0.708065	0.000695652	-0.338849	0.0130861		-0.641075	0.000439716	-0.188696	0.0569407
-1.13188	-1.17115	-1.1015	-1.6077	-1.36131	-1.08857	-0.697246	-0.676327	-0.618481	-1.54711	-1.43974	-1.37436	-1.50364	-1.41655	-1.44935	-1.08689	-1.0175	-0.94351	-1.25851	-1.30209	-1.2291	-1.75627	-1.42321	-1.75826	-1.34086	-1.3726	-1.34336	-1.13484	-1.35253	-0.664018	-1.45374	-1.45651	-1.01597	-1.26323	-1.64591	-1.35227	-0.0890392	0.0126774	-0.38268	0.0206121		0.437767	0.00175349	-0.00277845	0.976559		0.470826	0.000405892	-0.217682	0.223378
-0.251761	-0.575266	-0.566382	-0.907495	-1.87211	-1.3762	-1.59952	-1.27079	-1.44975	-0.608013	-0.785699	-1.04997	-1.14588	-1.36853	-0.989354	-2.08013	-1.91872	-1.99196	-1.32404	-1.56827	-1.31702	-1.84945	-2.43766	-2.10939	-2.18761	-2.32654	-1.73297	-0.46447	-1.38527	-1.44002	-0.814561	-1.16792	-1.99694	-1.40311	-2.13216	-2.08237	-0.679263	0.0163279	-0.729055	0.0139235		-1.18238	0.000927255	-0.353361	0.0963268		-0.975548	0.00215846	-0.920796	0.0439614
1.02614	0.947797	0.894925	0.62652	0.373766	0.234561	1.42249	1.51458	1.15538	0.188003	-0.0708942	-0.012995	-0.114422	-0.214822	-0.203192	1.00102	1.3472	1.0911	0.454207	0.493559	0.300631	0.97874	0.799681	0.987728	0.679768	1.1909	1.22412	0.956286	0.411616	1.36415	0.0347045	-0.177479	1.14644	0.416132	0.922049	1.0316	0.615466	0.0182656	0.505917	0.00590511		1.11173	0.000958393	-0.212183	0.0625531		0.407864	0.0132039	-0.544671	0.0192225
0.417522	0.500373	0.602052	0.844564	0.663927	0.714205	0.61633	0.757598	0.498667	0.903764	1.05097	0.886131	0.866419	0.975718	1.07169	0.70004	0.895636	0.710167	1.27452	1.26508	1.06536	1.4947	1.37393	1.69207	1.17214	1.02109	1.0652	0.506649	0.740899	0.624198	0.946955	0.971277	0.768614	1.20166	1.52023	1.08614	-0.115512	0.151818	0.318577	0.0358679		-0.178341	0.0424888	0.0243215	0.846364		0.117549	0.1802	0.23425	0.0438196
0.707891	0.71193	0.881981	0.855911	0.899393	0.915884	0.466909	0.429101	0.424234	0.967522	1.06391	1.18929	1.17226	1.27505	1.00671	0.780068	0.665622	0.796872	1.32307	1.29675	1.28726	0.955745	1.07757	0.854009	0.576616	0.479052	0.467663	0.767267	0.890396	0.440081	1.07358	1.15134	0.747521	1.30236	0.96244	0.507777	-0.794584	0.000666667	-0.339921	0.00689231		-0.326056	0.00633812	0.0777619	0.528847		-0.327186	0.00352695	0.123128	0.108711
0.621988	0.595638	0.532179	0.0948	-0.0509944	-0.196712	-0.895297	-0.885155	-1.09508	0.688123	0.650045	0.725093	0.277054	0.267196	0.0786359	-0.681817	-0.833775	-0.725652	0.510688	0.651388	0.618766	-0.190187	0.309837	0.129542	-0.329071	-0.411963	-0.390966	0.583268	-0.050969	-0.958511	0.687754	0.207629	-0.747081	0.593614	0.083064	-0.377333	-0.970947	0.000488189	-0.51055	0.0211639		-1.43483	0.000430493	-0.480125	0.00579098		-1.54178	0	-0.634237	0.00846076
5.21246	5.31335	5.22506	5.39999	5.27321	5.37022	5.21068	5.24902	5.16862	5.30874	5.32226	5.15354	5.35642	5.41355	5.4209	5.24932	5.11583	5.04133	4.93754	4.97471	4.98137	4.94106	5.00405	5.07456	5.28639	5.45261	5.24985	5.25029	5.34781	5.20944	5.26151	5.39696	5.13549	4.96454	5.00656	5.32962	0.365077	0.00471725	0.042017	0.34817		-0.126022	0.100566	0.135442	0.074301		-0.0408478	0.276624	0.0975188	0.118869
-0.873229	-0.9321	-0.790412	-0.475502	-0.498903	-0.388997	-0.436833	-0.468537	-0.46583	-0.910477	-0.963975	-0.6039	-0.493804	-0.623477	-0.500078	-0.634821	-0.634408	-0.480334	-0.125186	-0.167676	-0.300781	-0.0818274	-0.112297	-0.345648	-0.296226	-0.259405	-0.155546	-0.865247	-0.454467	-0.457066	-0.826117	-0.53912	-0.583188	-0.197881	-0.179924	-0.237059	-0.0391778	0.67026	0.0179569	0.915187		0.242929	0.0553696	0.286998	0.070191		0.40818	0.000989123	0.41078	0.00649779
-0.377096	-0.429288	-0.459954	-0.756541	-0.66766	-0.694043	-0.835193	-0.797142	-0.865356	-0.519614	-0.448995	-0.353787	-0.565893	-0.547138	-0.707857	-0.623905	-0.717123	-0.64095	-0.491803	-0.496907	-0.514059	-0.797231	-0.629481	-0.766114	-0.933789	-0.907869	-0.969707	-0.422113	-0.706081	-0.832564	-0.440799	-0.606963	-0.660659	-0.500923	-0.730942	-0.937121	-0.436198	0	-0.230019	0.010072		-0.219861	0.00834488	-0.166164	0.0715347		-0.410451	0.000416667	-0.283969	0.00637195
-2.33513	-2.29855	-1.38373	-1.83789	-1.94733	-1.06029	-1.71357	-1.57122	-1.53748	-1.45192	-1.42488	-2.69054	-3.34621	-1.09847	-1.56522	-1.65691	-1.62519	-2.13024	-1.6022	-1.54859	-2.11399	-3.18897	-1.68696	-1.59795	-1.71142	-1.43553	-1.57829	-2.0058	-1.61517	-1.60742	-1.85578	-2.0033	-1.80411	-1.75493	-2.15796	-1.57508	0.179844	0.36976	-0.403035	0.544524		0.0516659	0.956949	-0.147523	0.914683		0.398378	0.185941	0.390635	0.431009
-1.01311	-0.70436	-0.389826	-0.496927	-0.918819	-0.875913	-1.69151	-1.32868	-2.53404	-0.450838	-0.604083	-0.428104	-0.950779	-1.14319	-0.601634	-2.31947	-1.52006	-1.55149	-0.293322	-0.296177	-0.262099	-1.69296	-1.26813	-1.33961	-0.788542	-0.460026	-0.487541	-0.702431	-0.763886	-1.85141	-0.494342	-0.898535	-1.79701	-0.283866	-1.43357	-0.578703	-0.294837	0.0278961	-1.1497	0.00206295		-1.30267	0.004439	-0.404194	0.0693767		-1.14898	0.0241065	-0.0614552	0.865497
1.04889	1.09717	1.12909	1.07716	1.31379	1.25369	0.82447	0.791422	0.611612	0.716746	1.21855	0.895435	1.06906	1.17092	1.28902	0.672649	0.624395	0.736801	1.39503	1.46801	1.45229	1.65961	1.11126	1.95121	1.26178	1.32427	0.902012	1.09172	1.21488	0.742501	0.943578	1.17633	0.677949	1.43844	1.57403	1.16268	-0.27576	0.0608295	0.135586	0.689792		-0.265629	0.0728399	0.232756	0.204886		-0.349215	0.00511656	0.12316	0.172798
-1.61293	-1.68762	-1.58476	-1.38768	-1.96741	-1.45016	-2.17403	-1.92092	-2.19122	-1.59353	-1.38726	-1.48055	-1.86844	-1.74837	-1.88732	-2.49526	-2.09124	-2.45476	-1.36704	-1.61496	-1.39783	-2.09319	-2.19833	-1.78759	-2.0239	-2.30983	-1.72103	-1.62844	-1.60175	-2.09539	-1.48711	-1.83471	-2.34709	-1.45994	-2.02637	-2.01825	-0.558312	0.0232873	-0.566429	0.0136871		-0.859974	0.0024574	-0.347598	0.014714		-0.466955	0.00502861	0.0266871	0.932918
-1.94214	-1.43885	-1.31714	-0.532176	-0.639102	-0.731987	-1.0203	-1.04811	-0.766027	-1.28181	-1.01659	-1.24265	-0.335048	-0.438587	-0.344159	-0.774065	-0.877683	-0.725512	-1.24639	-1.88307	-1.38795	-0.0269153	-0.0419521	0.139159	-0.5949	-0.387374	-0.545487	-1.56604	-0.634422	-0.944813	-1.18035	-0.372598	-0.79242	-1.5058	0.0234304	-0.509254	0.996551	0.00689884	1.52924	0.00253309		0.387931	0.00705025	0.807753	0.00470345		0.62123	0.0228379	0.931622	0.0177025
-0.956181	-0.931639	-0.759782	-1.09741	-0.844033	-1.07509	-0.94287	-1.17575	-1.01057	-1.22964	-1.31618	-1.08438	-1.19611	-1.08468	-1.16029	-0.932148	-1.08746	-1.00332	-1.10854	-1.2419	-1.23951	-1.91448	-1.68332	-1.67699	-1.38773	-1.39425	-1.2034	-0.882534	-1.00551	-1.04306	-1.21007	-1.14703	-1.00765	-1.19665	-1.75826	-1.32846	-0.131806	0.0961555	-0.56161	0.005413		0.202423	0.0293747	0.0630403	0.478131		-0.16053	0.0918195	-0.122975	0.299563
0.231769	0.133244	0.22103	0.572845	0.511268	0.575688	0.541742	0.660167	0.603559	-0.255597	-0.308319	-0.0587642	0.508486	0.656434	0.382588	0.69521	0.714699	0.732385	-0.322217	-0.170608	-0.083328	0.599041	0.646219	0.436042	0.529577	0.393375	0.397725	0.195348	0.553267	0.601822	-0.20756	0.515836	0.714098	-0.192051	0.560434	0.440226	0.632277	0.00232807	0.752485	0.00238639		0.921658	0.000264209	0.723396	0.00715406		0.406475	0.00113054	0.357919	0.00572222
-2.50381	-2.82062	-2.45972	-2.56764	-2.38531	-2.8476	-3.17463	-2.85844	-2.86946	-2.74838	-2.67354	-2.66475	-2.81722	-2.87198	-3.08236	-3.14658	-3.23021	-3.30346	-2.9001	-2.88206	-2.7622	-2.66711	-3.5958	-3.51655	-3.11044	-3.36255	-3.33508	-2.59472	-2.60018	-2.96751	-2.69556	-2.92386	-3.22675	-2.84812	-3.25982	-3.26936	-0.421235	0.00769041	-0.411697	0.203122		-0.531196	0.000712941	-0.228298	0.0526469		-0.372795	0.0389634	-0.00546606	0.985381
0.0587862	-0.148475	-0.0378706	0.0910707	-0.322666	-0.11326	-0.148574	-0.126591	-0.118448	-1.41378	0.19676	-1.90535	-0.481952	-0.234933	-0.217597	-0.579231	-0.837227	-0.548518	-2.35482	-2.47553	-1.45063	0.0891364	-0.132876	-0.0630121	-0.383276	-0.0826423	-0.0646839	-0.0425198	-0.114952	-0.131204	-1.04079	-0.311494	-0.654992	-2.09366	-0.0355839	-0.176867	1.91679	0.00481032	2.05807	0.00546571		0.385798	0.657071	0.729296	0.308797		-0.0886846	0.134789	-0.072432	0.697808
0.0441911	0.0495231	0.310725	0.381189	0.0287066	0.320147	0.288844	0.591458	0.462599	0.426236	0.24113	0.193478	0.472949	0.550948	0.497144	0.392507	0.456428	0.358994	0.244981	0.247781	0.332099	0.510599	0.213207	0.517108	0.55255	0.777679	0.536024	0.134813	0.243348	0.447634	0.286948	0.507013	0.402643	0.274954	0.413638	0.622084	0.347131	0.0100665	0.138684	0.216116		0.115695	0.105807	0.220065	0.0425316		0.31282	0.0347727	0.108534	0.533138
-0.463833	-0.656427	-0.695823	-0.941901	-0.939353	-0.917202	-0.299413	-0.342972	-0.352173	-0.436707	-0.469094	-0.653382	-0.774214	-0.724417	-0.819242	-0.258034	-0.227683	-0.243431	-0.49424	-0.58725	-0.581829	-0.491489	-0.603951	-0.586951	-0.475439	-0.316771	-0.362548	-0.605361	-0.932819	-0.33152	-0.519728	-0.772624	-0.243049	-0.554439	-0.560797	-0.384919	0.16952	0.0224477	-0.00635735	0.937937		0.276679	0.0073638	-0.252897	0.0292365		0.273842	0.0119198	-0.327458	0.0189101
1.05148	1.05924	1.01116	0.947131	0.96805	0.953134	0.874537	0.881509	0.91074	0.794127	0.781472	0.870279	0.708544	0.613342	0.583657	0.639795	0.615202	0.660871	0.969274	0.92862	0.957975	0.473693	0.728761	0.487131	0.657089	0.649442	0.792859	1.04062	0.956105	0.888928	0.815293	0.635181	0.638623	0.951956	0.563195	0.699797	-0.252159	0.00548439	-0.388761	0.00849001		-0.17667	0.00264109	-0.180112	0.0225103		-0.151696	0.0013954	-0.0845188	0.0139843
-0.859589	-0.58954	-0.787931	-0.431296	-0.465645	-0.589193	-0.765891	-1.37192	-0.958009	-1.04784	-1.2216	-1.23926	-0.45601	-0.86604	-1.22015	-1.56161	-1.13959	-1.23478	-1.29253	-1.45096	-1.34977	-0.314064	-0.652365	-0.311896	-0.83366	-0.939958	-0.939105	-0.745687	-0.495378	-1.03194	-1.16957	-0.8474	-1.31199	-1.36442	-0.426108	-0.904241	0.460181	0.0018993	0.938314	0.00246904		-0.142425	0.26384	0.322168	0.218308		-0.286254	0.135954	0.250309	0.0617271
-1.63952	-1.46206	-1.61794	-1.86047	-1.89297	-2.35219	-2.2743	-2.31315	-2.46181	-1.25674	-1.05007	-1.00545	-1.75667	-1.5691	-1.82518	-2.0391	-1.96607	-1.90984	-1.37195	-1.42967	-1.70927	-1.48348	-2.09979	-2.28897	-2.43952	-2.24903	-2.6694	-1.57317	-2.03521	-2.34975	-1.10409	-1.71698	-1.97167	-1.50363	-1.95741	-2.45265	-0.949017	0.00399292	-0.453782	0.121948		-0.867585	0.000711268	-0.612897	0.00958935		-0.776584	0.00100147	-0.462041	0.0577145
-2.55656	-2.10385	-2.32344	-2.39945	-2.80164	-2.71907	-2.21347	-2.52502	-2.60442	-3.05279	-2.64927	-3.02295	-2.72551	-2.59329	-2.78828	-2.67436	-3.05791	-2.5636	-2.41325	-2.84781	-2.92933	-2.60377	-2.39909	-3.00605	-2.61071	-2.86971	-2.79004	-2.32795	-2.64005	-2.44764	-2.90834	-2.70236	-2.76529	-2.73013	-2.66964	-2.75682	-0.0266941	0.937892	0.0604922	0.878646		0.143049	0.513519	0.20598	0.205775		-0.119686	0.576474	-0.3121	0.153802
-2.39658	-2.39002	-2.38162	-2.38477	-2.10172	-2.51686	-2.26657	-2.2375	-2.01961	-2.59274	-2.50704	-2.68153	-2.34325	-2.3991	-2.29309	-1.69637	-1.68962	-1.70403	-2.80152	-2.7971	-2.65143	-2.42973	-2.30037	-2.27397	-2.34478	-2.62298	-2.33505	-2.38941	-2.33445	-2.17456	-2.59377	-2.34515	-1.69667	-2.75002	-2.33469	-2.43427	0.31575	0.0235243	0.415329	0.00593556		0.897098	0.000339506	0.248622	0.0183601		0.214846	0.0274633	0.0549559	0.760276
0.295014	0.181018	0.390969	0.258343	0.636147	0.432856	0.573521	0.629658	0.530706	0.483092	0.512805	0.0317357	0.0596378	0.206854	0.183956	0.536473	0.319425	0.441846	-0.368617	0.00659966	-0.653965	0.00584292	-0.346529	-0.00504112	0.599746	0.453152	0.745988	0.289	0.442449	0.577962	0.342544	0.150149	0.432581	-0.338661	-0.115242	0.599629	0.93829	0.00854018	0.223419	0.36539		0.090037	0.722677	-0.192395	0.290394		0.288962	0.00797677	0.153449	0.291182
-0.256169	0.0715697	-0.257398	-0.214978	-0.247937	-0.440037	-0.307561	-0.241297	-0.267324	-0.000523329	0.224392	0.0519145	-0.115723	-0.0537908	-0.106974	-0.304089	-0.601408	-0.190801	-0.294094	-0.0339224	-0.0457213	-0.988292	-0.785389	-0.789572	-0.698794	-0.539406	-0.435987	-0.147332	-0.300984	-0.272061	0.0919278	-0.0921625	-0.365433	-0.124579	-0.854418	-0.558062	-0.433483	0.0126607	-0.729839	0.00395256		-0.457361	0.0134112	-0.18409	0.0561404		-0.124729	0.236746	-0.153651	0.309695
-1.67403	-1.49847	-1.6136	-1.42729	-1.43923	-1.36711	-1.21538	-1.11203	-1.22255	-1.87543	-1.82464	-2.06829	-1.4083	-1.25403	-1.24697	-1.03354	-1.2682	-1.06651	-1.88593	-1.84634	-1.60248	-1.46591	-1.84926	-1.2867	-1.01398	-0.888288	-1.02775	-1.59537	-1.41121	-1.18332	-1.92279	-1.3031	-1.12275	-1.77825	-1.53396	-0.976671	0.801581	0.00180789	0.244296	0.226461		0.800038	0.00124851	0.619686	0.00646743		0.412046	0.00211111	0.184151	0.0382272
1.42957	1.41373	1.39513	1.5828	1.41194	1.39353	1.49425	1.57317	1.44695	1.36153	1.41657	1.19323	1.62541	1.52289	1.52816	1.34395	1.42954	1.34984	1.56325	1.56239	1.36844	1.82694	1.64821	1.90505	1.71172	1.84779	1.81299	1.41281	1.46276	1.50479	1.32378	1.55882	1.37445	1.49803	1.7934	1.79083	0.292807	0.012553	0.295372	0.0295962		0.0506676	0.541982	0.235043	0.0371576		0.0919793	0.0396507	0.0499483	0.505269
0.498597	0.610348	0.459685	0.890469	0.944003	0.880867	1.03402	0.944783	0.999992	0.577753	0.677049	0.666949	0.761248	0.72981	0.77617	1.17208	1.08753	1.13632	0.603812	0.597459	0.632519	1.04535	0.888142	0.912556	0.848208	0.696255	0.837046	0.522876	0.905113	0.992931	0.640584	0.755743	1.13198	0.611263	0.948681	0.793836	0.182573	0.0139955	0.337418	0.0040355		0.491394	0.00027476	0.115159	0.0318989		0.470055	0.00117834	0.382236	0.00652663
-0.384269	-0.333037	-0.281981	-0.695253	-0.620903	-0.602019	-0.482935	-0.495008	-0.426732	-0.468714	-0.511355	-0.471782	-0.585265	-0.646696	-0.670913	-0.239043	-0.289503	-0.300996	-0.838824	-0.944345	-0.850946	-0.832346	-0.678266	-0.864306	-0.901386	-0.826346	-0.767943	-0.333096	-0.639392	-0.468225	-0.48395	-0.634292	-0.276514	-0.878038	-0.791639	-0.831892	0.0461465	0.376177	0.0863989	0.225836		0.207437	0.000949826	-0.150341	0.0124444		-0.135129	0.0119297	-0.306296	0.00687653
-1.11502	-0.968385	-1.05365	-1.08769	-0.613131	-0.807902	-0.770642	-0.463425	-0.843336	-1.22827	-0.919873	-2.12909	-1.42282	-1.14971	-1.31995	-1.25005	-1.51009	-2.38916	-1.47611	-1.88836	-1.61559	-1.78842	-1.59852	-1.59107	-0.992082	-0.940917	-1.09422	-1.04568	-0.83624	-0.692468	-1.42575	-1.29749	-1.71643	-1.66002	-1.65934	-1.00907	0.650944	0.00648312	0.000679811	0.997698		-0.290688	0.679062	0.128251	0.826098		0.353215	0.0246227	0.209443	0.2196
-1.20608	-0.986105	-0.858336	-0.769946	-0.732717	-0.648002	-0.399739	-0.256752	-0.365449	-1.18907	-1.17969	-1.36882	-0.893657	-1.07115	-1.06412	-0.512576	-0.498497	-0.274605	-1.51689	-1.39588	-1.61497	-1.02437	-0.929036	-1.18812	-0.980264	-1.20314	-1.0316	-1.01684	-0.716888	-0.340647	-1.24586	-1.00964	-0.42856	-1.50925	-1.04717	-1.07167	0.437583	0.0073394	0.462077	0.00835227		0.817299	0.00104833	0.236217	0.0480268		0.676194	0.00282008	0.299953	0.056454
-0.896931	-1.43862	-0.817701	-0.117753	-0.144673	-0.218122	-0.170041	-0.292906	-0.405263	-0.843574	-0.940893	-2.08098	-0.599111	-0.507947	-0.147386	-0.476229	-0.393975	-0.372656	-0.806262	-1.78828	-1.0142	0.186477	0.0344553	0.299458	-0.0472124	-0.301367	-0.259756	-1.05108	-0.160183	-0.289403	-1.28848	-0.418148	-0.414287	-1.20291	0.173463	-0.202778	1.00013	0.019158	1.37638	0.00981294		0.874195	0.0415595	0.870333	0.0987024		0.761681	0.0123866	0.890901	0.019135
-0.719404	-0.698473	-0.749994	-0.670656	-0.753588	-0.756459	-0.948684	-0.964251	-0.985525	-0.866078	-1.03278	-0.937693	-0.861655	-0.713659	-0.754323	-1.11022	-0.959957	-1.03966	-0.696651	-0.712772	-0.671207	-0.302362	-0.366991	-0.123247	-0.631751	-0.704384	-0.744355	-0.722623	-0.726901	-0.966153	-0.945515	-0.776545	-1.03661	-0.693543	-0.2642	-0.693497	4.66506e-05	0.99953	0.429343	0.0061193		-0.0910943	0.127146	0.16897	0.0575247		-0.24353	0.000421314	-0.00427747	0.937122
-1.6831	-1.52696	-1.88049	-1.37661	-1.91821	-1.65852	-1.67547	-1.61418	-1.5025	-1.3051	-1.64754	-1.79646	-2.11728	-2.00682	-1.86834	-2.07044	-1.9977	-2.01736	-2.11796	-2.54022	-2.14561	-2.22201	-2.4926	-2.82962	-2.04127	-3.49193	-2.26123	-1.69685	-1.65112	-1.59738	-1.58304	-1.99748	-2.0285	-2.26793	-2.51475	-2.59814	-0.330213	0.553597	-0.246816	0.305348		-0.445464	0.0172492	-0.414443	0.0595699		0.0994673	0.384725	0.0457337	0.88052
-1.24542	-0.742397	-0.809174	-1.09034	-1.18751	-1.15911	-1.17809	-1.20714	-1.63102	-0.770809	-0.967756	-0.433276	-0.580016	-0.9849	-0.617548	-0.758946	-0.690168	-0.781022	-0.582435	-0.883263	-0.788384	-1.28909	-1.07348	-1.2782	-1.32968	-1.44536	-1.08123	-0.93233	-1.14565	-1.33875	-0.723947	-0.727488	-0.743379	-0.751361	-1.21359	-1.28542	-0.534062	0.012558	-0.462231	0.011997		-0.0194317	0.95412	-0.00354091	0.991815		-0.406422	0.0753016	-0.213324	0.254692
0.268102	0.106022	0.0381377	0.375202	0.14823	0.424637	0.343551	0.229415	0.387068	-0.126569	0.183618	0.147467	-0.0910552	0.22323	0.361877	-0.0300498	0.0149455	-0.049015	0.150433	0.517354	0.495496	0.792229	0.618998	1.15707	0.571271	0.464995	0.262496	0.137421	0.316023	0.320011	0.0681723	0.164684	-0.0213731	0.387761	0.8561	0.432921	0.0451596	0.864132	0.468339	0.0538636		-0.0895454	0.334795	0.0965118	0.668033		0.18259	0.0503881	0.178603	0.174817
-1.01243	-1.0704	-0.766247	-0.472399	-0.480038	-0.652246	-0.725641	-0.539339	-0.733454	-1.36731	-1.44134	-1.58548	-1.04709	-1.14226	-1.11801	-0.804455	-1.00009	-0.934552	-0.504534	-0.60826	-0.637327	-0.0390875	-0.34972	-0.757221	-0.672204	-0.813578	-0.536754	-0.949694	-0.534894	-0.666144	-1.46471	-1.10245	-0.913031	-0.583374	-0.38201	-0.674179	-0.0908053	0.302664	0.201364	0.395557		0.551677	0.0021617	0.362256	0.0128015		0.283549	0.0348952	0.414799	0.027533
-1.67397	-1.6485	-1.42173	-0.915304	-1.47255	-1.63227	-1.10923	-1.055	-1.02857	-1.18824	-1.42518	-1.25608	-1.16279	-1.41688	-1.00777	-1.41187	-0.970769	-0.855531	-1.44727	-1.51641	-1.4622	-1.6884	-2.00507	-2.03879	-1.25183	-1.09499	-1.29258	-1.5814	-1.34004	-1.06426	-1.28983	-1.19582	-1.07939	-1.47529	-1.91075	-1.21313	0.26216	0.0106683	-0.435457	0.0140366		0.210443	0.200509	0.0940184	0.596156		0.517136	0.00271682	0.241358	0.372788
-1.29777	-1.22549	-1.20941	-1.25011	-1.26744	-0.978053	-0.944649	-0.774204	-0.977815	-1.23492	-1.30202	-1.38329	-1.2641	-1.24191	-1.14175	-1.49262	-1.24061	-1.06015	-1.12801	-1.29213	-1.0213	-0.872448	-1.44806	-0.967216	-1.26565	-0.644646	-1.43506	-1.24423	-1.1652	-0.898889	-1.30675	-1.21592	-1.26446	-1.14715	-1.09591	-1.11512	0.0320308	0.947832	0.05124	0.872659		0.0422862	0.871164	0.0908269	0.170696		0.345338	0.00500274	0.0790271	0.510223
4.67515	4.76013	4.89356	4.83101	4.69012	4.75855	4.33179	4.28197	4.47352	4.9084	4.91969	5.02091	4.83169	4.79052	4.57388	4.32798	4.29382	4.30211	4.83102	5.14655	5.11632	4.90586	4.99816	4.71726	4.59125	4.63264	4.4521	4.77628	4.7599	4.36243	4.94967	4.73203	4.30797	5.0313	4.87376	4.55866	-0.472634	0.0105273	-0.157537	0.260174		-0.641697	0.0003207	-0.217636	0.0638997		-0.413851	0.00548549	-0.0163821	0.894688
-1.55058	-1.58083	-1.53175	-1.2156	-1.38	-1.2657	-1.21717	-1.01633	-1.25053	-1.47555	-1.32559	-1.33563	-1.21318	-1.01259	-1.01989	-1.31715	-1.29091	-1.26923	-1.2506	-1.30334	-1.25775	-1.10802	-1.3145	-1.11818	-1.0343	-0.784467	-0.894036	-1.55439	-1.2871	-1.16134	-1.37892	-1.08189	-1.29243	-1.27056	-1.18023	-0.904269	0.366295	0.00674344	0.0903306	0.224233		0.0864991	0.0776966	0.297038	0.0254157		0.393047	0.00423555	0.26729	0.0136035
0.587559	0.783417	0.637233	0.78622	0.684066	0.607557	0.643563	0.684052	0.593179	0.136997	0.0918102	0.0719435	0.275789	0.136944	0.234175	0.158638	0.196942	0.175105	0.64529	0.564965	0.563411	0.127568	0.273098	0.359553	0.726087	1.02769	0.906403	0.669403	0.692614	0.640264	0.10025	0.215636	0.176895	0.591222	0.253406	0.886726	0.295504	0.0193101	-0.337816	0.00846427		0.0766452	0.011528	0.115386	0.0604775		-0.0291389	0.774375	0.0232108	0.85142
1.00558	1.04858	1.16679	1.26563	1.18459	1.22258	0.972543	1.0781	1.01092	1.23209	1.18815	1.35015	1.29326	1.46013	1.47784	1.17217	1.14026	1.19908	1.23338	1.26803	1.38304	1.44743	1.41863	1.54176	1.2192	1.27185	1.08599	1.07365	1.22426	1.02052	1.2568	1.41041	1.1705	1.29482	1.46927	1.19235	-0.102473	0.146789	0.174454	0.0289812		-0.0862915	0.0820408	0.153612	0.104606		-0.0531244	0.342853	0.150617	0.0543622
-0.606098	-0.143342	-0.134701	0.311863	0.100415	-0.0983872	0.470886	0.253932	0.436138	0.601394	0.731086	0.801594	0.580539	0.727984	0.559516	0.801796	0.799034	0.965657	0.54132	0.997635	0.898349	0.641319	0.543619	0.672375	0.890059	1.01997	1.08807	-0.294714	0.10463	0.386985	0.711358	0.62268	0.855496	0.812435	0.619104	0.999367	0.186932	0.200926	-0.19333	0.211908		0.144138	0.0706416	-0.0886781	0.316137		0.681699	0.0099768	0.399344	0.109733
-1.04943	-0.557042	-0.676525	-0.358484	-0.862904	-0.757178	-0.711094	-0.584264	-0.649933	-0.951355	-1.49548	-0.840442	-2.78394	-1.21526	-0.85823	-2.29915	-1.87942	-2.1634	-1.45755	-1.46441	-1.51042	-1.55021	-1.47015	-1.08404	-1.08503	-0.957874	-1.42895	-0.760998	-0.659522	-0.64843	-1.09576	-1.61914	-2.11399	-1.47746	-1.36813	-1.15728	0.320178	0.0478924	0.10933	0.531962		-1.01823	0.00623112	-0.523386	0.478996		0.112568	0.511445	0.101476	0.743018
1.78549	1.74643	1.76135	1.60957	1.58697	1.56917	1.82021	1.80264	1.85989	1.89863	1.88587	1.99407	1.76475	1.75646	1.67129	2.14135	2.13421	2.14504	1.57783	1.59431	1.59324	1.63299	1.62693	1.43493	1.67491	1.6308	1.70368	1.76442	1.58857	1.82758	1.92619	1.73083	2.1402	1.58846	1.56495	1.66979	0.0813329	0.0131606	-0.0235114	0.817813		0.21401	0.00231831	-0.195358	0.0176992		0.0631555	0.0194275	-0.175858	0.00587179
1.26768	1.31174	1.29147	1.2358	1.45854	1.47024	1.06284	0.959611	1.04048	1.43572	1.36828	1.12433	1.26551	1.38359	1.05115	0.842036	0.682232	0.945566	1.2838	1.42543	1.40661	1.35526	1.06529	1.60554	0.656756	0.572547	0.851946	1.2903	1.38819	1.02098	1.30944	1.23342	0.823278	1.37194	1.34203	0.69375	-0.678195	0.00260644	-0.0299153	0.913948		-0.486167	0.0078714	-0.0760251	0.684271		-0.269319	0.00146532	0.0978971	0.276818
-0.283344	-0.234028	-0.408543	-0.226951	-0.31941	-0.216886	-0.474464	-0.227758	-0.322503	-0.308826	-0.1925	-0.337098	-0.303468	-0.485091	-0.642009	-1.00031	-0.835413	-1.21539	-0.0128939	0.0493267	-0.0775292	-0.441965	-0.302466	-0.516511	-0.763365	-0.610541	-0.697701	-0.308638	-0.254416	-0.341575	-0.279475	-0.476856	-1.01704	-0.0136988	-0.420314	-0.690536	-0.676837	0.000609756	-0.406615	0.00619305		-0.737563	0.00235368	-0.197381	0.126482		-0.0329367	0.828959	0.0542228	0.462262
3.32585	3.27709	3.27959	3.45397	3.19793	3.24754	2.83222	2.90273	2.96065	3.38334	3.38664	3.23383	3.43274	3.5634	3.49611	2.87	2.8521	2.84956	3.58195	3.49455	3.50852	3.9246	3.7822	4.05013	3.09245	3.22715	3.05138	3.29418	3.29981	2.89853	3.3346	3.49742	2.85722	3.52834	3.91898	3.12366	-0.404677	0.00276394	0.390639	0.00809132		-0.47738	0.000710122	0.162813	0.0569782		-0.395642	0.000921013	0.00563486	0.965067
-0.100061	0.0537837	-0.0349085	0.0396008	0.141631	0.0628471	-0.356901	-0.330705	-0.344405	-0.03	0.218002	0.12097	0.196903	0.0383561	-0.055258	-0.324452	-0.449599	-0.305334	0.198516	0.0636799	0.0155795	-0.0480645	0.00906086	-0.0582175	-0.611991	-0.695125	-0.562856	-0.0270619	0.0813597	-0.344004	0.102991	0.0600005	-0.359795	0.0925917	-0.032407	-0.623324	-0.715916	0.000973737	-0.124999	0.071518		-0.462786	0.00337217	-0.0429903	0.783194		-0.316942	0.00206172	0.108422	0.11432
2.23917	2.16623	2.22238	1.86864	1.71992	1.71817	2.43837	2.44384	2.40298	2.41786	2.33762	2.36026	1.35224	1.24244	1.23267	1.37147	1.45568	1.37876	1.44335	1.47454	1.55624	0.979189	1.06843	1.04044	1.8746	2.17324	1.95174	2.20926	1.76891	2.4284	2.37191	1.27578	1.40197	1.49138	1.02935	1.99986	0.508487	0.00519641	-0.462022	0.00145665		-0.969943	0.000369231	-1.09613	0.00427586		0.219133	0.00122263	-0.440353	0.00619108
1.21117	1.30367	1.25976	1.06334	0.822677	0.785466	0.304147	0.244077	0.257704	1.18953	1.16827	1.09405	0.873049	0.73037	0.85601	0.113978	0.0853043	0.0170178	1.39471	1.47346	1.42022	1.43849	1.35245	1.61787	0.833758	1.0212	0.816183	1.2582	0.890494	0.268643	1.15061	0.81981	0.0721	1.42946	1.4696	0.890381	-0.539081	0.00202475	0.0401425	0.73171		-1.07851	0.000345324	-0.330805	0.00760791		-0.989555	0	-0.367704	0.0243696
-2.7921	-2.71579	-2.66172	-2.82641	-2.5988	-2.15062	-2.28974	-2.0761	-2.66437	-2.60875	-2.50931	-2.66731	-2.41857	-2.4678	-2.25859	-2.06079	-2.79065	-2.07589	-2.3016	-3.09458	-2.01229	-1.56537	-2.19369	-1.31389	-1.8272	-2.48916	-2.11421	-2.7232	-2.52528	-2.3434	-2.59512	-2.38166	-2.30911	-2.46949	-1.69098	-2.14352	0.325967	0.404611	0.778506	0.0998345		0.286009	0.193325	0.213465	0.0504236		0.379802	0.0530441	0.197929	0.406655
-1.27135	-1.21388	-1.24664	-1.05037	-0.99679	-1.10752	-1.28976	-1.29016	-1.37714	-1.095	-1.13912	-1.0853	-0.800354	-0.83739	-0.685843	-1.28467	-1.39903	-1.33509	-1.01704	-0.831836	-0.902632	-0.259994	-0.347403	-0.0250945	-0.792166	-0.724159	-0.956176	-1.24396	-1.05156	-1.31902	-1.10647	-0.774529	-1.33959	-0.917169	-0.21083	-0.824167	0.0930018	0.276875	0.706339	0.0047924		-0.233121	0.00226001	0.331944	0.00623382		-0.0750653	0.0481138	0.192399	0.0132317
-0.889823	-0.960718	-1.11747	-0.734052	-1.06255	-0.880984	-0.609107	-0.709412	-0.638238	-1.68607	-1.40767	-1.61555	-0.669703	-0.788033	-0.441989	-0.656687	-0.739348	-0.774855	-0.889322	-0.570919	-0.572976	0.667267	0.409113	0.74014	-0.357688	-0.203453	-0.564222	-0.989337	-0.89253	-0.652252	-1.56976	-0.633242	-0.72363	-0.677739	0.605507	-0.375121	0.302618	0.0634381	1.28325	0.00208824		0.846132	0.000760904	0.93652	0.00577547		0.337084	0.00646607	0.0968066	0.49623
-0.0523646	-0.10907	-0.0485003	0.118812	0.211564	0.289911	0.404579	0.213023	0.454074	-0.235999	-0.217494	-0.194016	0.558327	0.647606	0.498551	0.556279	0.468143	0.551732	0.0293519	0.0646641	0.0612838	0.872811	0.894494	0.647023	0.329668	0.181827	0.261434	-0.0699783	0.206762	0.357225	-0.215836	0.568161	0.525385	0.0517666	0.804776	0.257643	0.205876	0.00757511	0.753009	0.00170474		0.741221	0.000274286	0.783998	0.00231776		0.427204	0.00343181	0.276741	0.0141625
-2.54501	-2.63509	-2.00268	-2.03788	-2.2027	-2.10864	-1.58634	-1.67243	-1.93395	-2.36382	-1.86466	-1.67781	-1.68159	-1.70934	-1.97278	-2.18593	-2.36747	-2.31209	-1.34473	-1.4033	-1.95671	-2.06315	-2.42054	-1.63263	-1.78823	-1.70758	-1.57673	-2.39426	-2.11641	-1.73091	-1.96876	-1.7879	-2.2885	-1.56825	-2.03878	-1.69085	-0.122601	0.651743	-0.470528	0.150191		-0.319734	0.105997	0.180862	0.502314		0.663356	0.0219827	0.277856	0.242971
-0.718374	-0.944107	-0.90035	-0.907516	-0.778911	-0.816507	-0.666511	-0.806208	-0.728822	-1.17684	-0.990593	-1.08201	-0.971577	-0.851984	-1.12886	-0.803256	-0.648826	-0.56877	-0.93251	-0.879483	-0.911481	-0.788977	-0.780432	-1.02103	-1.01215	-1.16375	-0.905092	-0.854277	-0.834311	-0.733847	-1.08315	-0.98414	-0.673617	-0.907824	-0.86348	-1.027	-0.119173	0.12204	0.0443443	0.68733		0.409532	0.0050798	0.0990094	0.365068		0.12043	0.126817	0.0199662	0.876077
-2.65097	-1.37896	-2.84124	-2.61177	-2.79293	-3.06062	-2.35199	-1.60456	-2.51673	-2.01471	-2.17808	-1.52942	-2.0394	-2.37709	-2.23923	-2.17774	-1.88828	-1.73007	-1.6365	-1.85976	-1.48178	-2.91013	-3.48578	-3.60963	-1.94107	-2.39908	-1.7372	-2.29039	-2.82177	-2.15776	-1.9074	-2.21857	-1.93203	-1.65935	-3.33518	-2.02578	-0.366431	0.10878	-1.67583	0.00343832		-0.0246259	0.961501	-0.311171	0.21293		0.13263	0.894789	-0.531381	0.337875
-2.21214	-2.13874	-2.32881	-3.16527	-2.67477	-2.58371	-2.47763	-2.62359	-2.63416	-2.47645	-2.9726	-3.27823	-4.00877	-3.30701	-3.74881	-3.35355	-3.16453	-3.42565	-2.35956	-2.77157	-2.43901	-3.21585	-2.73881	-3.12169	-3.30108	-2.7447	-2.99707	-2.22656	-2.80792	-2.57846	-2.9091	-3.6882	-3.31458	-2.52338	-3.02545	-3.01428	-0.490904	0.0408668	-0.502071	0.0423644		-0.405483	0.0862248	-0.779102	0.0625968		-0.351899	0.00611818	-0.581354	0.043963
0.235344	0.155608	0.195355	0.268519	0.442002	0.403978	0.404995	0.410086	0.401821	0.224472	0.0820837	0.0800884	0.0298731	0.0901058	0.289804	-0.0682411	0.337639	0.175311	0.0502136	0.295313	0.0262473	0.316961	-0.000340939	0.156439	0.345773	0.392001	0.0989161	0.195435	0.3715	0.405634	0.128881	0.136594	0.148236	0.123925	0.157686	0.278897	0.154972	0.203032	0.0337618	0.869394		0.0193548	0.942876	0.00771292	0.961129		0.210199	0.00112951	0.176064	0.0442267
2.34018	2.36702	2.42053	2.95779	2.75652	2.80385	2.2693	2.3981	2.37343	2.45676	2.42808	2.44812	2.87136	2.91344	2.99018	2.48108	2.40932	2.39431	2.50909	2.50993	2.63619	3.33364	3.05115	3.29977	2.83181	2.88568	2.67172	2.37591	2.83939	2.34694	2.44432	2.92499	2.42824	2.55173	3.22819	2.7964	0.244669	0.0199124	0.676455	0.00357525		-0.0160848	0.687174	0.480674	0.00433028		-0.0289672	0.6258	0.463477	0.00872139
-0.116562	-0.0391567	-0.257222	-0.0304117	0.130144	0.0579329	-0.0739238	-0.0382288	-0.0438941	-0.686175	-0.848787	-0.769154	-0.244678	-0.553995	-0.330994	-0.492447	-0.448448	-0.555959	-0.506392	-0.395925	-0.336137	-0.705468	-0.372108	0.0803232	-0.120312	-0.424674	-0.222056	-0.137647	0.0525551	-0.0520155	-0.768039	-0.376556	-0.498951	-0.412818	-0.332418	-0.255681	0.157137	0.125896	0.0804003	0.82676		0.269087	0.00469037	0.391483	0.0231537		0.0856312	0.167876	0.190202	0.0766303
-0.808848	-0.788407	-0.925732	-0.575169	-0.366153	-0.352357	-0.048321	-0.0540111	-0.0510871	-0.702468	-0.597005	-0.504779	-0.313217	-0.493977	-0.385312	-0.299578	-0.225462	-0.456293	-5.65052e-05	-0.225934	-0.247096	-1.11547	-1.00752	-1.11206	-0.295163	0.136536	-0.194733	-0.840996	-0.431226	-0.0511398	-0.601417	-0.397502	-0.327111	-0.157696	-1.07835	-0.117787	0.0399091	0.886687	-0.920654	0.0014026		0.274306	0.0160647	0.203915	0.0550492		0.789856	0	0.409769	0.0165587
-1.26801	-1.36226	-0.926402	-0.778929	-1.06469	-1.00999	-0.899092	-0.621587	-1.24254	-0.750322	-1.39876	-0.839229	-0.575685	-0.726373	-0.563285	-0.759153	-0.634177	-0.607459	-1.03601	-0.793508	-0.784318	-0.428078	-0.932558	-0.470095	-0.744603	-0.491887	-0.904989	-1.18556	-0.951202	-0.921072	-0.996102	-0.621781	-0.66693	-0.871279	-0.610244	-0.713826	0.157453	0.268685	0.261036	0.182067		0.329172	0.0954669	0.374321	0.135482		0.264486	0.211743	0.234355	0.213003
-1.64499	-1.36149	-1.83351	-2.37905	-1.91781	-1.60458	-1.61163	-1.60384	-1.62878	-1.23023	-1.09221	-1.07572	-1.33461	-1.30676	-1.2534	-1.24571	-1.48525	-1.55094	-1.05021	-1.38369	-1.16201	-1.23742	-1.16389	-1.26427	-1.73618	-1.4295	-1.58973	-1.61333	-1.96715	-1.61475	-1.13272	-1.29826	-1.4273	-1.19864	-1.22186	-1.58513	-0.386498	0.0244717	-0.0232251	0.892815		-0.29458	0.02154	-0.165537	0.0398473		-0.00142256	0.996165	-0.353818	0.250378
1.44913	1.38846	1.36158	0.658952	0.721642	0.719596	0.227304	0.223753	0.22425	1.32036	1.34718	1.35781	0.654939	0.548758	0.568195	0.0876055	0.146255	0.124832	0.878582	0.864459	0.897675	-0.266796	0.20504	-0.0653682	0.103406	0.167784	0.178633	1.39972	0.700064	0.225102	1.34178	0.590631	0.119564	0.880239	-0.0423747	0.149941	-0.730298	0	-0.922614	0.0040236		-1.22222	0	-0.751151	0.0052766		-1.17462	0	-0.699658	0.00447619
0.48755	0.560451	0.5105	0.295113	0.34926	0.3922	-0.0520089	-0.0834601	-0.0267951	0.538758	0.534972	0.603624	0.418074	0.407268	0.363152	-0.15708	-0.107662	-0.0740309	0.616713	0.682617	0.667543	0.364685	0.479516	0.416191	-0.138996	0.0836127	-0.0238166	0.519501	0.345524	-0.054088	0.559118	0.396165	-0.112924	0.655624	0.42013	-0.0264001	-0.682025	0.00101021	-0.235494	0.00564103		-0.672042	0.000200418	-0.162953	0.00904244		-0.573589	0	-0.173976	0.0163936
-0.53685	-0.681962	-0.622847	-0.282413	-0.228296	-0.277289	-0.047652	-0.292383	-0.342203	-0.956446	-0.801667	-0.452392	-0.381523	-0.51068	-0.293715	-0.0141473	-0.0031538	0.0310779	-0.455673	-0.415145	-0.371012	-0.444934	-0.624593	-0.578873	-0.239264	-0.167972	-0.0645723	-0.613886	-0.262666	-0.227413	-0.736835	-0.395306	0.00459226	-0.413944	-0.549467	-0.157269	0.256674	0.00810101	-0.135523	0.0592828		0.741427	0.00447407	0.341529	0.0936852		0.386474	0.0110957	0.35122	0.00659302
0.0761936	-0.12653	0.0528872	-0.0347514	-0.296653	-0.428834	-0.495259	-0.756826	-0.576174	0.222098	0.181494	0.132756	-0.0200231	0.0603735	0.0789244	-0.346464	-0.53997	-0.524532	-0.0709636	0.185532	0.23517	0.128566	0.103763	0.466805	0.00518632	0.0329101	-0.233799	0.00085028	-0.253413	-0.609419	0.178783	0.0397583	-0.470322	0.11658	0.233045	-0.065234	-0.181814	0.147743	0.116465	0.517644		-0.649105	0.000738292	-0.139024	0.0288584		-0.61027	0.00279089	-0.254263	0.124
-1.86632	-1.68176	-1.66139	-1.69479	-1.99535	-2.00819	-1.75815	-1.41839	-1.57696	-1.14177	-1.33451	-1.23491	-1.84591	-1.78321	-1.61365	-1.49698	-1.38522	-1.33085	-1.52937	-1.54248	-1.35819	-1.67107	-1.55755	-1.52066	-1.32271	-1.43815	-1.40298	-1.73649	-1.89944	-1.5845	-1.23706	-1.74759	-1.40435	-1.47668	-1.58309	-1.38795	0.0887311	0.183174	-0.106414	0.186111		-0.167285	0.0384167	-0.510524	0.00914535		0.151987	0.177134	-0.162952	0.25047
0.0828569	0.261552	0.208633	0.694964	0.64956	0.520944	0.727675	0.69494	0.653453	0.280585	0.23018	0.241539	0.565716	0.584544	0.717806	0.455854	0.476748	0.399387	0.477567	0.437247	0.367124	0.395554	0.120757	0.294015	0.807927	0.993768	0.862195	0.184347	0.621823	0.692023	0.250768	0.622688	0.443997	0.427313	0.270109	0.887963	0.460651	0.00259472	-0.157204	0.106474		0.193229	0.0014816	0.371921	0.00488641		0.507675	0.00114801	0.437476	0.0117191
-0.831782	-1.00404	-0.811077	-0.715251	-0.392284	-0.426266	-0.0374062	0.0952628	0.0491436	-0.483091	-0.482022	-0.394448	-0.386104	-0.294075	-0.443243	0.595457	0.596414	0.582489	-1.81939	-1.43593	-1.56928	-0.814949	-0.576336	-0.658532	-0.272189	-0.406664	-0.17902	-0.882301	-0.511267	0.0356667	-0.453187	-0.374474	0.591453	-1.6082	-0.683272	-0.285958	1.32224	0.00101115	0.924929	0.00332385		1.04464	0	0.0787127	0.192586		0.917968	0.000390356	0.371034	0.042978
-1.15046	-1.54762	-1.30976	-1.9015	-0.936475	-1.02983	-0.584198	-0.932349	-1.41205	-1.38704	-1.20089	-1.4721	-1.19779	-0.890437	-0.945195	-0.95335	-0.683721	-0.674366	-1.39836	-1.17838	-2.12534	-0.567388	-0.855232	-0.757139	-0.719716	-0.844956	-0.679238	-1.33595	-1.28927	-0.9762	-1.35334	-1.01114	-0.770479	-1.56736	-0.726586	-0.74797	0.819392	0.0269924	0.840776	0.0339558		0.582865	0.00464267	0.342204	0.0492573		0.359745	0.16044	0.0466777	0.933155
0.411938	0.419453	0.409969	0.52302	0.423039	0.454388	0.0392764	0.0147994	0.0579097	0.309055	0.339683	0.179882	0.501294	0.498157	0.585387	0.0573401	0.0587358	0.0299964	0.454249	0.446588	0.478706	0.777435	0.666708	0.824891	0.306632	0.458973	0.258831	0.413787	0.466816	0.0373285	0.276206	0.528279	0.0486908	0.459848	0.756345	0.341479	-0.118369	0.0717452	0.296497	0.00554522		-0.227516	0.00542572	0.252073	0.016551		-0.376458	0	0.053029	0.146182
-0.354691	-0.614969	-0.547448	-0.649427	-0.752565	-0.690563	-0.230826	-0.189278	-0.293063	-0.807023	-0.728541	-0.764673	-0.71303	-0.751281	-0.876828	-0.108732	-0.0556035	-0.107944	-0.935286	-0.855726	-1.01381	-0.341331	-0.276714	-0.346209	-0.568994	-0.748299	-0.718851	-0.505703	-0.697518	-0.237723	-0.766746	-0.78038	-0.0907596	-0.93494	-0.321418	-0.678715	0.256225	0.0150516	0.613522	0.000845209		0.675986	0.000266667	-0.013634	0.877822		0.26798	0.017623	-0.191816	0.0848344
1.41745	1.44738	1.45051	1.57383	1.52564	1.50864	0.998268	1.02484	0.993805	1.58779	1.52706	1.55244	1.63621	1.58851	1.72247	1.38845	1.35905	1.34579	1.32021	1.37256	1.40794	1.95729	1.85745	2.00718	1.36982	1.37674	1.29154	1.43845	1.53604	1.00564	1.55576	1.64906	1.36443	1.3669	1.94064	1.34603	-0.0208736	0.68852	0.573735	0.00112474		-0.191334	0.000949355	0.0932972	0.0877983		-0.43281	0	0.0975891	0.0197639
-0.320481	-0.304942	-0.293992	-0.424942	-0.341327	-0.331876	-0.48798	-0.53299	-0.466651	-0.745919	-0.664673	-0.652142	-0.719775	-0.709505	-0.82917	-0.839507	-0.903722	-0.89914	-0.10605	-0.05353	-0.0638068	-0.521768	-0.327096	-0.576968	-0.362593	-0.292083	-0.30793	-0.306471	-0.366048	-0.495874	-0.687578	-0.752817	-0.880789	-0.0744623	-0.475278	-0.320868	-0.246406	0.00130337	-0.400815	0.00701924		-0.193212	0.00351152	-0.0652389	0.234871		-0.189402	0.00117523	-0.0595771	0.120267
0.668479	0.870449	0.88592	0.908169	0.652496	0.638598	-1.80973	-2.00997	-1.98085	0.65459	0.706326	0.720381	0.700533	0.536345	0.639009	-1.63049	-1.72971	-1.78215	1.58233	1.66164	1.62432	1.77381	1.62904	1.47013	-1.66463	-1.05948	-1.4009	0.808282	0.733088	-1.93351	0.693766	0.625296	-1.71412	1.62276	1.62432	-1.375	-2.99776	0.00067027	0.0015626	0.99254		-2.40788	0	-0.0684701	0.244441		-2.7418	0	-0.0751948	0.608333
0.425143	0.279826	0.541105	0.814917	0.638288	0.710184	0.712887	0.913274	0.953977	0.633086	0.535549	0.547211	0.745056	0.994178	0.97766	1.19628	1.27162	1.22647	0.453388	0.567351	0.685923	0.621814	0.578941	0.664784	1.1796	1.28636	1.06663	0.415358	0.72113	0.860046	0.571949	0.905631	1.23146	0.568887	0.621846	1.17753	0.608641	0.00311735	0.052959	0.542398		0.659507	0.000328358	0.333682	0.0221271		0.444688	0.00855276	0.305772	0.0364626
-1.81053	-2.19396	-1.84558	-2.16879	-2.16267	-2.44852	-1.44069	-1.42562	-1.42217	-2.15918	-2.01577	-1.99637	-2.10726	-2.43284	-2.31329	-1.10389	-1.18533	-0.846297	-2.36501	-2.52283	-2.39151	-2.31059	-2.18207	-2.49666	-1.5074	-1.9331	-1.71052	-1.95002	-2.25999	-1.42949	-2.05711	-2.28446	-1.04517	-2.42645	-2.32977	-1.71701	0.709442	0.00520949	0.0966751	0.406893		1.01193	0.000950771	-0.227359	0.0944338		0.520531	0.00818551	-0.309971	0.113491
-0.457818	-0.469077	-0.353481	-0.0929847	-0.0490851	-0.078279	0.362871	0.0220635	0.266704	-0.679648	-0.759988	-0.433087	-0.344363	-0.275198	-0.253144	0.235631	-0.00559378	0.0358124	-1.01471	-1.02188	-0.757194	-0.5294	-0.42821	-0.724628	-0.0852211	-0.251259	-0.250743	-0.426792	-0.0734496	0.217213	-0.624241	-0.290901	0.0886165	-0.931262	-0.560746	-0.195741	0.735521	0.00255451	0.370516	0.0279695		0.712858	0.00260697	0.33334	0.0340134		0.644005	0.0028747	0.353342	0.00509691
-1.75479	-1.81645	-1.65492	-2.00151	-2.07215	-1.97703	-1.67726	-1.37779	-1.45835	-1.075	-1.17372	-1.02703	-1.79436	-1.53044	-1.88181	-1.72339	-1.45266	-1.85496	-1.42595	-1.46021	-1.75956	-2.90197	-2.48142	-2.41608	-1.95677	-1.94034	-1.52934	-1.74205	-2.0169	-1.50447	-1.09192	-1.73554	-1.67701	-1.54858	-2.59982	-1.80882	-0.260243	0.136049	-1.05125	0.00608559		-0.585089	0.00522758	-0.643622	0.00963662		0.237584	0.0422009	-0.274844	0.0155248
0.537307	0.556346	0.558933	0.791629	0.960565	0.888285	0.817559	0.82496	0.958894	0.757679	0.70703	0.883671	1.172	1.05669	1.10264	1.1646	1.14297	1.14977	0.946911	0.981026	0.945904	1.04356	1.02588	0.881916	0.816144	0.702236	0.869921	0.550862	0.88016	0.867138	0.782793	1.11045	1.15245	0.957947	0.983784	0.7961	-0.161846	0.0197257	0.0258371	0.731654		0.369654	0.0014845	0.327654	0.0121046		0.316276	0.00214439	0.329298	0.00977444
-1.77725	-1.99913	-1.8099	-1.58871	-1.9278	-2.06404	-1.07695	-1.27215	-1.16124	-1.83076	-1.97124	-1.76775	-1.91856	-1.9274	-1.43085	-0.963351	-0.945045	-1.04911	-2.72976	-2.61356	-2.06969	-2.14685	-2.33789	-2.19066	-1.5094	-1.51859	-2.36429	-1.86209	-1.86018	-1.17011	-1.85658	-1.75894	-0.985835	-2.471	-2.22513	-1.79743	0.673574	0.0723787	0.245871	0.280769		0.870746	0.000294017	0.0976436	0.68528		0.69198	0.00154348	0.00191204	0.994721
-0.316906	-0.335898	-0.61637	-0.978162	-0.759013	-0.76378	-0.912171	-0.982152	-1.07648	-0.450094	-0.672483	-0.358314	-1.18125	-1.00413	-1.13571	-1.08593	-0.993433	-1.17076	-1.44534	-1.00404	-0.886752	-1.32036	-1.35566	-1.13126	-2.59849	-2.40765	-1.71654	-0.423058	-0.833652	-0.990268	-0.493631	-1.10703	-1.08337	-1.11204	-1.26909	-2.24089	-1.12885	0.0151432	-0.157051	0.459941		-0.589744	0.00294879	-0.613399	0.00911621		-0.56721	0.00422644	-0.410593	0.0352274
-0.0794036	-0.0544879	-0.0178616	0.116716	0.0718923	0.0948992	0.158165	0.150002	0.179012	0.0294502	0.0621567	0.0267069	0.235532	0.168039	0.252387	0.145036	0.0745335	0.161719	0.252362	0.187995	0.231086	0.0854833	-0.00653887	0.261425	0.259821	0.330356	0.336699	-0.0505844	0.0945024	0.162393	0.0394379	0.218653	0.127096	0.223814	0.113456	0.308959	0.0851444	0.0290731	-0.110358	0.204828		0.0876584	0.0173439	0.179215	0.00746253		0.212978	0.000659794	0.145087	0.00972565
-0.69436	-0.642814	-0.754134	-0.476738	-0.255236	-0.378072	-0.278841	-0.233984	-0.369772	-0.726291	-0.633427	-0.663416	-0.238815	-0.402188	-0.283451	-0.13441	-0.143047	-0.0842361	0.0512297	0.0163906	-0.0517724	0.0837533	0.138897	-0.0457511	0.0770524	-0.0420597	0.0871105	-0.697103	-0.370015	-0.294199	-0.674378	-0.308151	-0.120564	0.00528264	0.0589664	0.0407011	0.0354184	0.564634	0.0536838	0.457184		0.553813	0.000305981	0.366227	0.0071087		0.402904	0.00151991	0.327088	0.0185729
-0.868335	-0.77175	-0.795643	-0.702032	-0.869301	-0.85523	-1.26539	-1.17551	-1.17935	-0.604188	-0.647516	-0.596089	-0.544632	-0.640795	-0.68811	-1.23509	-1.14628	-1.13038	-0.50017	-0.52861	-0.511481	-0.707327	-0.746765	-0.849715	-0.846367	-0.919607	-0.815665	-0.811909	-0.808854	-1.20675	-0.615931	-0.624512	-1.17058	-0.51342	-0.767936	-0.860546	-0.347126	0.000775934	-0.254515	0.00592955		-0.554649	0.000252294	-0.00858124	0.912026		-0.394839	0.000977778	0.00305533	0.975013
-0.562157	-0.651145	-0.768983	-1.56305	-1.20641	-1.3667	-1.73326	-1.75892	-1.61595	-0.841014	-0.933351	-0.99517	-1.54907	-1.67351	-1.41647	-2.51234	-2.31609	-2.49417	-0.662133	-0.652013	-0.53497	-1.7142	-1.41923	-1.41092	-1.74231	-2.15688	-1.54091	-0.660762	-1.37872	-1.70271	-0.923178	-1.54635	-2.44087	-0.616372	-1.51479	-1.81337	-1.197	0.00329469	-0.898413	0.00208543		-1.51769	0.000421456	-0.623171	0.00558657		-1.04195	0.000342069	-0.717956	0.0111753
1.11006	1.15653	1.00434	0.994287	1.15553	1.04326	0.794926	0.829736	0.722925	1.21707	1.1539	1.18	1.24584	1.10777	1.19662	1.10081	1.10244	1.00463	0.846442	0.876781	0.82905	1.20799	1.14777	1.15981	0.981935	0.949353	0.983275	1.09031	1.06436	0.782529	1.18366	1.18341	1.06929	0.850757	1.17185	0.971521	0.120764	0.00282414	0.321097	0.000320557		-0.114364	0.0162605	-0.000249624	0.996418		-0.307782	0.00346084	-0.0259502	0.794192
-1.52318	-1.77085	-2.1406	-2.04613	-2.07077	-1.91788	-1.97107	-2.11259	-2.02894	-2.17385	-2.35274	-1.95642	-2.2189	-2.69328	-1.72375	-1.99695	-2.167	-1.62459	-1.9585	-2.08062	-1.87098	-1.1221	-1.03418	-1.13477	-1.73048	-2.13588	-2.07478	-1.81155	-2.0116	-2.03753	-2.16101	-2.21198	-1.92951	-1.97003	-1.09702	-1.98038	-0.0103486	0.971146	0.873016	0.000251366		0.231492	0.190008	-0.0509729	0.921316		-0.225986	0.195834	-0.200052	0.355234
0.185282	0.122411	0.176494	0.378093	0.338473	0.420881	0.422349	0.538241	0.505467	0.290356	0.213393	0.20448	0.394261	0.558831	0.51788	0.459104	0.461885	0.529669	0.317039	0.362119	0.358514	0.618042	0.42932	0.591315	0.719707	0.617596	0.599895	0.161396	0.379149	0.488686	0.236076	0.490324	0.483553	0.34589	0.546225	0.645732	0.299842	0.00245936	0.200335	0.0219854		0.247476	0.00147123	0.254248	0.0162073		0.32729	0.00141081	0.217753	0.00867399
-1.35462	-1.13196	-1.15329	-1.20693	-0.795339	-0.803823	-0.10914	-0.220776	-0.0366571	-1.6686	-1.40251	-1.19495	-1.25176	-1.16495	-1.51292	-0.6232	-0.781723	-0.879653	-0.81953	-1.10337	-1.05343	-1.37451	-1.53818	-2.07759	-1.0565	-0.679946	-0.663814	-1.21329	-0.935363	-0.122191	-1.42202	-1.30988	-0.761525	-0.992108	-1.66343	-0.800085	0.192023	0.20357	-0.671317	0.0311453		0.660497	0.00651256	0.112146	0.617361		1.0911	0.00037037	0.277926	0.141369
0.220075	0.397777	0.312567	0.483497	0.501843	0.461139	0.239039	0.143596	0.106194	0.345044	0.310195	0.23389	0.517434	0.286344	0.633935	0.477399	0.489616	0.438382	0.677867	0.782002	0.750108	0.869648	0.767775	0.964855	0.951092	0.857287	1.00003	0.31014	0.48216	0.162943	0.296377	0.479238	0.468466	0.736659	0.867426	0.936138	0.199479	0.0125147	0.130767	0.0823299		0.172089	0.00489777	0.182861	0.147684		-0.147197	0.0463715	0.17202	0.0388318
1.28621	1.26863	1.24015	1.39161	1.05075	1.06467	1.14995	0.977153	1.16354	1.28731	1.2375	1.44924	1.26446	1.29668	1.19828	1.23825	1.22546	1.20574	0.973125	1.24679	1.47471	1.48564	1.35609	1.46056	1.28769	1.21548	1.00947	1.265	1.16901	1.09688	1.32468	1.25314	1.22315	1.23154	1.4341	1.17088	-0.0606584	0.831827	0.202559	0.210538		-0.101536	0.0967209	-0.0715454	0.368063		-0.168117	0.0279788	-0.0959884	0.480424
-0.0886614	-0.162561	-0.140614	-0.623075	-0.490287	-0.532288	-0.374874	-0.421357	-0.40864	0.013519	0.0514836	-0.0165932	-0.29513	-0.395806	-0.485249	-0.0922718	-0.123004	-0.123842	-0.59411	-0.631432	-0.573839	-1.03089	-0.877166	-0.783404	-0.817704	-0.747154	-0.763801	-0.130612	-0.54855	-0.401624	0.0161365	-0.392061	-0.113039	-0.599794	-0.897153	-0.77622	-0.176426	0.00321302	-0.29736	0.0126647		-0.129176	0.00258369	-0.408198	0.00570333		-0.271012	0.000637874	-0.417938	0.00543297
-0.314813	-0.256228	-0.230006	0.0375094	-0.0409818	-0.0799108	-0.271953	-0.258793	-0.289594	-0.287906	-0.277414	-0.391944	-0.0298979	-0.0231512	0.088661	-0.24938	-0.229219	-0.312499	-0.438956	-0.366041	-0.353648	0.0981238	0.0314908	0.266918	-0.00854373	0.0953019	-0.157487	-0.267016	-0.0277944	-0.273447	-0.319088	0.0118706	-0.263699	-0.386215	0.132177	-0.0235763	0.362639	0.0076229	0.518393	0.00352087		0.0553886	0.16713	0.330959	0.00753372		-0.0064311	0.897058	0.239221	0.012512
-1.87589	-0.478709	-3.49509	-2.19515	-1.03177	-2.16644	-1.61248	-2.21196	-1.53677	-1.30693	-1.89948	-1.5724	-1.40406	-1.29019	-0.96847	-1.30394	-1.42868	-1.3613	-0.915286	-0.946289	-1.01296	-1.08066	-0.988678	-0.717031	-0.537392	-0.911588	-0.72415	-1.9499	-1.79779	-1.78707	-1.59294	-1.2209	-1.36464	-0.958178	-0.928789	-0.724377	0.233801	0.0590124	0.0293892	0.874233		0.228295	0.150965	0.372032	0.144212		0.162825	0.924404	0.152111	0.924527
0.805911	0.945383	0.943636	0.92487	1.10733	1.03841	0.712744	0.711405	0.787041	0.607999	0.512344	0.712328	0.716173	0.615084	0.580651	0.363139	0.42226	0.406818	1.12877	1.11131	1.08062	0.59296	0.650332	0.324681	0.661899	0.600031	0.657477	0.89831	1.02354	0.737063	0.61089	0.637303	0.397406	1.1069	0.522658	0.639802	-0.467098	0.000459259	-0.584242	0.00603808		-0.213484	0.0108779	0.0264126	0.809327		-0.161247	0.0198858	0.125228	0.147751
1.12541	1.11342	1.12154	1.02305	0.964923	1.09358	1.20629	1.21075	1.12762	1.58254	1.53539	1.59234	1.10745	1.07847	1.0419	1.41276	1.17571	1.29734	1.35261	1.33591	1.37157	0.725042	0.910721	0.920021	1.30811	1.40031	1.43892	1.12012	1.02718	1.18155	1.57009	1.07594	1.29527	1.35337	0.851928	1.38244	0.0290786	0.529394	-0.501437	0.0024046		-0.274817	0.00857545	-0.494145	0.0031		0.0614303	0.0471483	-0.0929401	0.0715226
-1.28841	-1.61442	-1.34403	-1.12819	-0.900624	-1.02134	-0.591724	-0.547242	-0.46097	-1.14465	-1.90263	-1.37834	-1.09288	-1.32809	-1.0072	-0.531662	-0.614573	-0.479843	-2.06612	-1.20269	-1.2888	-1.55923	-1.15699	-1.66932	-0.923649	-1.87254	-1.21684	-1.41562	-1.01672	-0.533312	-1.47521	-1.14272	-0.542026	-1.5192	-1.46184	-1.33768	0.181524	0.7642	0.0573562	0.915311		0.933182	0.00711572	0.332485	0.231123		0.882309	0.00140185	0.398902	0.037303
0.289213	0.228318	0.474797	0.353004	0.273947	0.280877	0.267232	0.189329	0.398719	0.423499	0.389225	0.302254	0.481197	0.567352	0.491151	0.296007	0.141886	0.148041	0.32265	0.439888	0.358941	0.329836	0.279175	0.426503	0.454246	0.536079	0.416788	0.330776	0.302609	0.285093	0.37166	0.513233	0.195311	0.373826	0.345171	0.469038	0.0952111	0.0725486	-0.0286552	0.713682		-0.176349	0.0207439	0.141574	0.0371258		-0.0456829	0.758167	-0.0281669	0.814945
0.877599	0.987462	0.910526	1.18732	1.06546	1.03526	1.26682	1.22012	1.23977	0.0681851	0.103483	0.070451	0.315836	0.261842	0.365466	0.346284	0.391776	0.392313	0.42577	0.561088	0.552975	0.442881	0.285452	0.531457	1.05682	1.13621	1.08142	0.925195	1.09601	1.24224	0.0807063	0.314381	0.376791	0.513278	0.41993	1.09148	0.578206	0.000597372	-0.0933474	0.30583		0.296085	0.000260355	0.233675	0.00525974		0.31704	0.0011683	0.170818	0.0458539
-1.23162	-1.07667	-1.13682	-0.913522	-0.912669	-0.982792	-0.888877	-0.929556	-0.910051	-1.18578	-1.21944	-1.13819	-1.09708	-1.20328	-1.13538	-1.14824	-1.03717	-1.07	-0.644737	-0.605783	-0.616035	-0.685943	-0.729587	-0.717187	-0.708961	-0.754773	-0.717063	-1.14837	-0.936327	-0.909494	-1.18114	-1.14525	-1.08514	-0.622185	-0.710906	-0.726933	-0.104748	0.00472326	-0.0887211	0.00724455		0.0960035	0.0334375	0.0358948	0.42318		0.238878	0.00458721	0.212045	0.0226071
-0.429333	-0.433461	-0.316872	-0.0236707	-0.0874262	-0.314296	-0.462032	-0.495752	-0.580162	-0.363242	-0.520536	-0.441997	-0.0830219	-0.0353081	0.254631	-0.311248	-0.337023	-0.34166	-0.282073	-0.394437	-0.212727	0.536154	0.458097	0.761277	-0.0172679	0.0627482	-0.227813	-0.393222	-0.141798	-0.512649	-0.441925	0.0454336	-0.329977	-0.296412	0.585176	-0.0607775	0.235635	0.0446597	0.881588	0.00210155		0.111948	0.0318644	0.487359	0.0181553		-0.119427	0.0449485	0.251425	0.0646568
-0.420661	-0.544543	-0.306634	-0.570527	-0.314962	-0.342267	-0.526942	-0.68654	-0.564845	0.142413	-0.0755739	0.0681961	-0.325391	-0.238592	-0.1692	-0.711173	-0.594367	-0.767247	0.431873	0.199215	0.286702	-0.57858	-0.219085	-0.4517	-0.418564	-0.559306	-0.433601	-0.423946	-0.409252	-0.592776	0.0450118	-0.244394	-0.690929	0.30593	-0.416455	-0.470491	-0.776421	0.000913518	-0.722385	0.00604506		-0.735941	0.000839133	-0.289406	0.0246528		-0.16883	0.0644197	0.0146941	0.935287
-0.000719309	0.0454447	0.125517	0.10784	0.142536	0.0716753	0.418641	-0.0409729	0.0771458	-0.12879	0.17843	0.0133474	-0.165257	0.179496	-0.274445	0.495588	0.400525	0.34765	-1.03073	-0.760514	-0.840929	-0.10744	0.054235	0.122812	0.341343	-0.160133	-0.288715	0.0567474	0.10735	0.151605	0.0209958	-0.0867353	0.414588	-0.877391	0.0232023	-0.0358351	0.841556	0.0110179	0.900594	0.0020739		0.393592	0.00795414	-0.107731	0.610758		0.0948574	0.588608	0.050603	0.302287
-0.0525873	0.049588	-0.111892	-0.0883527	0.130864	-0.0340323	-0.168075	-0.0218928	-0.211204	-0.217597	-0.101493	-0.0098536	0.100477	-0.108914	-0.112128	0.042707	-0.117918	0.0585766	-0.20955	-0.109679	-0.0614278	-0.293118	-0.484749	-0.322371	-0.198655	-0.195343	-0.0363159	-0.0382973	0.00282637	-0.133724	-0.109648	-0.0401881	-0.00554498	-0.126885	-0.366746	-0.143438	-0.0165527	0.897368	-0.239861	0.0227584		0.104103	0.163091	0.06946	0.54227		-0.0954267	0.17811	0.0411236	0.720745
0.891205	0.799028	0.828765	0.262075	0.268567	0.399391	0.194186	0.228059	0.241674	0.399923	0.478878	0.4308	-0.14904	-0.181031	-0.196216	-0.217027	-0.339328	-0.351147	0.320653	0.31882	0.288318	0.0627096	0.183331	-0.00511837	-0.138571	-0.0422909	-0.129052	0.839666	0.310011	0.221306	0.436533	-0.175429	-0.302501	0.309264	0.0803074	-0.103304	-0.412568	0.000720461	-0.228957	0.0119791		-0.739034	0.000249433	-0.611962	0.0062		-0.61836	0	-0.529655	0.00557609
-0.385112	-0.703771	-1.3045	-1.34758	-1.65368	-2.07107	-2.16384	-2.34248	-2.28835	-0.85934	-1.07695	-0.990618	-1.50615	-2.14844	-1.40382	-1.60242	-1.34371	-1.49809	-1.98155	-0.901795	-0.883283	-1.02201	-1.12013	-1.20277	-1.85829	-2.67255	-1.97804	-0.797796	-1.69078	-2.26489	-0.975635	-1.68614	-1.48141	-1.25554	-1.11497	-2.16962	-0.914081	0.0611591	0.140574	0.803884		-0.505772	0.00402447	-0.710506	0.0426607		-1.46709	0.00410999	-0.892981	0.0647045
2.50461	2.49532	2.45504	2.44688	2.55745	2.56202	2.22787	2.30035	2.29022	2.5548	2.60364	2.62322	2.50594	2.53969	2.40721	2.37313	2.37068	2.34079	2.62653	2.67263	2.57971	2.29394	2.54791	2.23201	2.358	2.23024	2.32389	2.48499	2.52212	2.27281	2.59388	2.48428	2.36153	2.62629	2.35795	2.30405	-0.322243	0.00278205	-0.268336	0.039299		-0.232352	0.000718861	-0.109603	0.0658916		-0.212179	0.00155276	0.0371249	0.442581
-1.31863	-1.61683	-1.55924	-2.17754	-1.62532	-1.41398	-1.28157	-1.32767	-1.38422	-1.37083	-0.973022	-1.20961	-0.961683	-1.13793	-1.28028	-0.652703	-0.708575	-0.681071	-0.688132	-0.827648	-0.735632	-1.50524	-1.75113	-1.5294	-1.66103	-1.41298	-1.04425	-1.49823	-1.73895	-1.33115	-1.18449	-1.12663	-0.680783	-0.750471	-1.59526	-1.37275	-0.622281	0.0171277	-0.844786	0.0017561		0.503703	0.00619652	0.0578546	0.799249		0.167077	0.0906105	-0.240718	0.406259
0.556833	0.728	0.690094	0.866873	0.926316	0.816367	0.820652	0.715892	0.775624	0.638248	0.480826	0.540969	0.964313	0.739316	0.97468	0.829682	0.893046	0.842762	0.714483	0.780599	0.729065	1.1372	0.924505	1.00048	1.16683	1.13391	1.12057	0.658309	0.869852	0.770723	0.553347	0.89277	0.855164	0.741382	1.02073	1.14044	0.399055	0.000631043	0.279345	0.0109068		0.301816	0.0024557	0.339422	0.0228821		0.112413	0.0771149	0.211543	0.0333398
-0.0204909	0.0403759	-0.0617893	0.172025	0.191014	0.145315	0.104573	0.153673	0.0725224	0.0118802	0.18431	-0.0135906	0.269609	0.190859	0.267127	0.0509987	-0.00498676	-0.0442772	0.286638	0.0633242	0.121192	0.179917	0.144811	0.169394	0.471671	0.586371	0.548723	-0.0139681	0.169451	0.110256	0.0608665	0.242532	0.000578245	0.157051	0.164707	0.535588	0.378537	0.00645708	0.00765594	0.949996		-0.0602883	0.343884	0.181665	0.0519823		0.124224	0.0167747	0.183419	0.0121229
0.968902	0.946766	0.929698	0.815362	0.607765	0.585445	1.22692	1.24591	1.25681	1.24678	1.33724	1.35056	1.03818	0.891191	0.903138	1.47066	1.56276	1.49652	0.846061	0.873475	1.01001	0.63847	0.477476	0.689041	0.904073	0.885367	0.873178	0.948455	0.669524	1.24321	1.31153	0.944171	1.50998	0.909848	0.601662	0.887539	-0.0223086	0.784436	-0.308185	0.0143892		0.198452	0.00511217	-0.367357	0.00754704		0.294757	0	-0.278931	0.0275025
-0.0652907	-0.16956	-0.201381	-0.122361	-0.0929875	-0.206359	-0.284105	-0.370152	-0.288085	-0.211144	-0.21068	-0.346587	-0.0555513	-0.0544169	0.121915	-0.0866957	0.00363302	-0.180916	-0.249603	-0.237706	-0.176675	0.688681	0.48519	0.69906	0.0906193	0.170478	0.0967135	-0.145411	-0.140569	-0.314114	-0.256137	0.00398215	-0.087993	-0.221328	0.62431	0.11927	0.340598	0.000986401	0.845638	0.00119016		0.168144	0.0322709	0.260119	0.0284883		-0.168703	0.0152353	0.00484173	0.956482
-1.24469	-1.51046	-1.61286	-1.76255	-1.75843	-2.02949	-1.45215	-1.34845	-1.88653	-2.60585	-2.48448	-2.375	-2.29787	-2.31207	-2.76818	-2.74424	-2.52467	-2.41005	-1.52722	-1.6722	-1.54925	-2.02595	-1.6185	-2.29552	-2.11362	-1.61601	-1.80525	-1.456	-1.85016	-1.56238	-2.48844	-2.45937	-2.55965	-1.58289	-1.97999	-1.84496	-0.262072	0.0956572	-0.397101	0.0879329		-0.0712101	0.657697	0.0290713	0.919693		-0.106373	0.71031	-0.394154	0.0565904
0.553086	0.492519	0.470846	0.254691	0.240836	0.312278	0.299295	0.388009	0.309625	0.040777	0.0855851	0.119428	-0.147345	-0.211818	-0.242781	-0.0823965	-0.206197	-0.134027	0.0749466	-0.113438	-0.00180411	-0.0582712	0.198588	-0.0559731	0.0187504	-0.0623977	-0.00904942	0.505484	0.269269	0.33231	0.0819302	-0.200648	-0.140874	-0.0134319	0.0281146	-0.0175656	-0.00413362	0.972205	0.0415465	0.786929		-0.222804	0.00375008	-0.282578	0.00480793		-0.173174	0.00627999	-0.236215	0.00843939
-0.103986	-0.786961	0.20583	0.536481	0.289639	0.5804	1.07966	0.874507	0.913055	-0.0698535	0.0246682	-0.147141	0.20474	0.207395	0.373233	0.201345	0.322921	0.34292	0.306792	0.240082	0.0635402	0.357001	0.182622	0.376066	0.593242	0.880056	0.797997	-0.228372	0.46884	0.955741	-0.0641088	0.261789	0.289062	0.203472	0.30523	0.757098	0.553627	0.00666472	0.101758	0.325613		0.353171	0.00361762	0.325898	0.0170904		1.18411	0.0102698	0.697212	0.0868822
-0.109328	-0.143927	-0.180833	0.0319324	0.0707464	0.07444	-0.00479198	-0.0222547	-0.0206716	-0.429605	-0.317442	-0.353153	0.0782163	0.0843608	-0.0181296	0.310245	0.261342	0.269436	-0.0764487	-0.0952551	-0.118218	0.276236	0.234104	0.246638	0.0847127	-0.0100539	0.0416322	-0.144696	0.0590396	-0.0159061	-0.366733	0.0481492	0.280341	-0.0966407	0.252326	0.0387637	0.135404	0.00836193	0.348967	0		0.647074	0.000342146	0.414883	0.00476375		0.12879	0.00275439	0.203735	0.00652349
-1.9374	-1.89565	-2.22228	-1.83921	-1.76959	-1.90767	-1.85328	-1.9443	-1.87683	-1.94713	-2.40693	-2.13711	-1.90969	-1.93479	-1.87182	-1.92403	-1.71115	-1.8227	-2.34478	-2.39152	-2.22279	-1.34644	-1.52714	-1.39091	-1.41113	-1.65591	-1.47741	-2.01845	-1.83882	-1.89147	-2.16373	-1.90544	-1.8193	-2.3197	-1.4215	-1.51482	0.804878	0.00155172	0.898196	0.000855721		0.34443	0.0347192	0.258289	0.116358		0.126979	0.207923	0.179621	0.175812
-0.066047	0.134367	0.0352199	0.245956	0.227223	0.0679812	-0.109483	-0.202428	-0.198955	0.0413539	-0.00757885	-0.0171673	0.26335	0.0813468	0.384084	-0.194963	-0.0531325	-0.242418	0.0837729	0.257504	0.187558	0.541734	0.446557	0.619791	0.116595	0.207664	0.0801215	0.0345134	0.180387	-0.170288	0.00553592	0.242927	-0.163505	0.176278	0.536027	0.134793	-0.0414849	0.596265	0.359749	0.00735931		-0.169041	0.0210387	0.237391	0.0545675		-0.204802	0.0186988	0.145874	0.142979
-0.0201461	0.0641272	0.0333908	0.282288	0.231042	0.250014	-0.0200937	0.0267813	-0.0160525	0.0978143	0.132843	0.18656	0.402081	0.278054	0.303806	0.0894752	0.12465	0.112049	0.270907	0.284951	0.18571	0.337444	0.406583	0.217198	0.102665	0.0787094	0.153014	0.0257906	0.254448	-0.00312161	0.139073	0.32798	0.108724	0.247189	0.320408	0.111463	-0.135727	0.0149207	0.073219	0.284103		-0.0303481	0.222029	0.188908	0.0193272		-0.0289122	0.296149	0.228657	0.00636225
-0.307255	-0.265397	-0.284252	-0.41334	-0.338294	-0.38285	-0.718032	-0.724603	-0.625706	-0.852996	-0.875487	-0.972406	-1.17826	-0.925064	-0.987599	-1.65687	-1.48201	-1.46696	-0.86433	-0.74789	-0.712998	-0.89662	-0.757077	-0.707087	-1.04394	-0.837531	-0.782049	-0.285635	-0.378161	-0.689447	-0.900296	-1.03031	-1.53528	-0.775073	-0.786928	-0.887841	-0.112768	0.207033	-0.0118554	0.925831		-0.634985	0.000832	-0.13001	0.183251		-0.403812	0.000343434	-0.0925267	0.0282474
-0.189639	-0.531211	-0.532114	-0.984596	-1.09231	-1.04554	-0.94731	-0.807896	-0.861229	-1.29806	-1.22283	-1.3465	-1.06903	-1.05084	-1.07862	-0.684385	-0.848874	-0.651117	-1.3182	-1.31503	-1.18653	-0.625289	-0.461736	-0.676047	-1.24871	-1.33886	-1.33313	-0.417655	-1.04082	-0.872145	-1.28913	-1.06617	-0.728125	-1.27326	-0.587691	-1.3069	-0.0336443	0.608934	0.685564	0.0020908		0.561005	0.00123294	0.222964	0.00795883		-0.45449	0.011696	-0.623162	0.0136133
-1.617	-1.423	-1.57291	-1.41942	-1.40466	-1.33669	-2.13625	-2.07761	-2.31065	-1.17821	-1.52885	-1.6084	-1.2666	-0.983361	-1.16477	-1.85548	-1.70011	-1.69029	-2.48626	-2.14731	-2.62455	-1.33221	-0.934359	-1.20721	-1.52682	-1.63976	-1.40173	-1.53764	-1.38693	-2.17483	-1.43849	-1.13824	-1.74863	-2.41937	-1.15793	-1.52277	0.896603	0.00479191	1.26144	0.00363554		-0.31014	0.0421156	0.300242	0.115263		-0.637197	0.00205478	0.150713	0.0804562
-0.73774	-0.638656	-0.780267	-0.596179	-0.575946	-0.629319	-1.15969	-0.832643	-1.07824	-0.681136	-0.836571	-0.923882	-0.32653	-0.2213	-0.295346	-1.14541	-0.886062	-0.931403	-0.401138	-0.471872	-0.477782	0.0479085	-0.118859	-0.205242	-0.942581	-0.809533	-0.631212	-0.718888	-0.600482	-1.02352	-0.813863	-0.281059	-0.987626	-0.450264	-0.0920641	-0.794442	-0.344178	0.013567	0.3582	0.00900511		-0.173763	0.0889637	0.532804	0.00616374		-0.304637	0.0246343	0.118406	0.0629538
-1.91019	-1.52742	-1.84579	-1.43046	-1.76385	-1.37872	-0.866945	-1.18007	-1.147	-1.32093	-1.28376	-0.814533	-1.44077	-1.61602	-1.00712	-1.08992	-0.96949	-1.00794	-0.86064	-0.950325	-1.31798	-1.29178	-0.82098	-1.09084	-0.676259	-0.881753	-0.631477	-1.76113	-1.52434	-1.06467	-1.13974	-1.35464	-1.02245	-1.04298	-1.06787	-0.72983	0.313154	0.0694185	-0.0248837	0.942987		0.11729	0.535811	-0.214896	0.448189		0.696462	0.00706098	0.236791	0.233791
3.43354	3.54578	3.46255	3.58548	3.69273	3.62385	3.60416	3.58438	3.76854	3.50049	3.63928	3.65337	3.74833	3.64936	3.61253	3.84049	3.74186	3.82611	3.62861	3.66801	3.52239	3.60791	3.65494	3.39315	3.50391	3.40092	3.52283	3.48063	3.63402	3.65236	3.59771	3.67007	3.80282	3.60633	3.552	3.47588	-0.13045	0.0477402	-0.0543345	0.655221		0.205106	0.0105986	0.0723609	0.307715		0.171735	0.0337338	0.153395	0.036771
-0.140875	-0.0948098	-0.110782	-0.0759921	-0.334678	-0.210332	-0.421101	-0.469642	-0.435768	-0.0698535	-0.0665326	-0.094712	-0.0942113	-0.0651739	0.151695	-0.245724	-0.316733	-0.307165	0.0584309	-0.0347502	-0.114328	-0.122422	-0.138651	0.273357	0.0112751	0.122245	-0.0246935	-0.115489	-0.207001	-0.44217	-0.0770327	-0.0025634	-0.289874	-0.0302158	0.00409452	0.0362755	0.0664914	0.313522	0.0343103	0.886467		-0.212841	0.000891771	0.0744693	0.403594		-0.326681	0.000472381	-0.091512	0.300238
-1.52202	-1.61103	-1.00379	-0.396413	-0.819752	-0.572695	-0.368062	-0.0547101	-0.418935	-1.66695	-1.60196	-1.44949	-1.00157	-0.829428	-1.15882	-0.578096	-0.56324	-0.507229	-1.6087	-1.2908	-1.40231	-1.41533	-1.15001	-1.38157	-0.626	-0.887721	-0.798023	-1.37895	-0.596287	-0.280569	-1.5728	-0.996607	-0.549522	-1.43394	-1.31564	-0.770581	0.663356	0.00500324	0.118302	0.398254		1.02328	0.000244716	0.576194	0.0133262		1.09838	0.0051096	0.782661	0.0335148
-0.18905	-0.128933	0.0139349	-0.19324	-0.142495	-0.197439	0.361324	0.410097	0.358349	-0.382732	-0.513302	-0.58154	-0.253044	-0.351535	-0.200348	0.451485	0.410033	0.301915	-0.613502	-0.379649	-0.537669	-0.445269	-0.438722	-0.475299	0.203471	0.21639	0.274303	-0.101349	-0.177725	0.37659	-0.492525	-0.268309	0.387811	-0.510273	-0.453097	0.231388	0.741661	0.0010303	0.0571764	0.483917		0.880336	0.000262195	0.224216	0.0392829		0.477939	0.00169321	-0.0763751	0.295064
0.730067	0.780112	0.722606	0.937599	1.06655	1.06165	0.737462	0.749619	0.825842	0.304651	0.305582	0.350952	0.655252	0.588601	0.560385	0.288103	0.259501	0.293023	0.846265	0.805333	0.77489	0.702367	0.762842	0.514085	0.818646	0.690523	0.760083	0.744262	1.02193	0.770974	0.320395	0.601413	0.280209	0.808829	0.659765	0.756417	-0.052412	0.203867	-0.149065	0.094479		-0.0401855	0.042372	0.281018	0.00486212		0.0267127	0.439061	0.277671	0.0111897
1.06611	1.20312	1.20102	0.95184	1.01928	0.829643	0.437889	0.495687	0.527516	1.27789	1.30809	1.10074	1.00453	0.78836	0.975777	0.198441	0.260179	0.293349	1.16765	1.10695	1.04988	0.490262	0.759302	0.436058	0.484359	0.757298	0.538961	1.15675	0.933589	0.487031	1.22891	0.922889	0.250656	1.10816	0.561874	0.593539	-0.514618	0.00476376	-0.546284	0.00702617		-0.978251	0.000338583	-0.306019	0.0339816		-0.66972	0.000397661	-0.223162	0.0426209
-1.83883	-1.69248	-1.76456	-1.78292	-1.81465	-1.82164	-1.39894	-1.2495	-1.26753	-1.88201	-2.24353	-1.93712	-1.93348	-1.81636	-1.78895	-1.4184	-1.55416	-1.48339	-1.93937	-1.85142	-1.88228	-1.88718	-2.20738	-1.93395	-1.30918	-1.43409	-1.60995	-1.76529	-1.8064	-1.30532	-2.02089	-1.84627	-1.48532	-1.89102	-2.0095	-1.45107	0.439949	0.00719544	-0.118481	0.286383		0.535567	0.00554015	0.174621	0.207746		0.459969	0.00191296	-0.0411117	0.429855
0.274478	0.238327	0.271315	0.406936	0.423515	0.44198	0.791085	0.788265	0.827692	-0.154606	-0.12083	-0.0753167	0.160126	0.0795128	0.118069	0.720304	0.70442	0.6871	0.189821	0.107739	0.116875	0.442243	0.499671	0.339315	0.635841	0.492142	0.637414	0.261373	0.424144	0.802347	-0.116917	0.119236	0.703942	0.138145	0.427077	0.588466	0.45032	0.00171544	0.288932	0.00668616		0.820859	0.000648649	0.236154	0.00537131		0.540974	0	0.162771	0.00563692
-1.14014	-1.2989	-1.22093	-1.0491	-1.13114	-1.14763	-1.23742	-1.19954	-1.15358	-1.20601	-1.09595	-0.980955	-0.946874	-0.939876	-0.988567	-1.04952	-1.15593	-1.12111	-1.18275	-1.46019	-1.11111	-1.11911	-1.04219	-1.14531	-1.07569	-1.23743	-1.16141	-1.21999	-1.10929	-1.19685	-1.09431	-0.958439	-1.10886	-1.25135	-1.1022	-1.15818	0.0931755	0.459662	0.149148	0.211376		-0.0145494	0.92257	0.135868	0.102861		0.0231409	0.778197	0.110698	0.112976
0.0746849	0.0286477	-0.0144246	-0.102097	-0.252486	-0.076086	-0.280629	-0.198786	-0.214357	0.111653	0.121482	0.226233	-0.0037787	0.13216	0.0115125	0.105548	0.0190458	0.0891023	0.132708	0.170348	0.189751	0.340871	0.270082	0.220645	-0.269733	-0.281183	-0.287979	0.029636	-0.143556	-0.231257	0.153123	0.0466314	0.0712322	0.164269	0.277199	-0.279632	-0.443901	0	0.11293	0.0311023		-0.0818907	0.0690674	-0.106491	0.120343		-0.260893	0.00191104	-0.173192	0.0525126
1.88658	1.86531	2.0183	2.34124	2.22803	2.29467	2.14854	2.05586	2.13043	2.01776	2.00985	2.04909	2.35938	2.3384	2.09783	2.21148	2.11779	2.1993	1.79212	1.8378	1.86583	2.0041	2.13784	1.67721	2.1059	2.04889	1.9274	1.92339	2.28798	2.11161	2.02557	2.2652	2.17619	1.83192	1.93972	2.0274	0.195479	0.0163824	0.107801	0.513309		0.150626	0.00489498	0.239636	0.0471207		0.188217	0.0153004	0.364586	0.0108828
0.842664	0.86809	0.833032	0.709882	0.722184	0.72511	0.82133	0.711505	0.771397	0.513294	0.53417	0.592217	0.412137	0.373836	0.323809	0.850866	0.899208	0.886665	0.372759	0.400134	0.36704	0.334487	0.487337	0.282188	0.570037	0.482583	0.595864	0.847929	0.719059	0.768077	0.54656	0.369927	0.878913	0.379978	0.368004	0.549495	0.169517	0.00735226	-0.0119742	0.910406		0.332353	0.000262595	-0.176633	0.0130702		-0.0798515	0.04052	-0.12887	0.00651685
-1.57217	-0.510402	-1.31754	-1.51138	-0.778654	-0.211279	-0.137675	-0.950087	-1.59363	-0.964558	-0.886158	-1.23447	-0.135133	-1.62127	-0.900375	-1.64241	-1.1617	-2.18309	-1.55029	-1.43955	-1.36519	-2.33198	-1.79	-1.39768	-1.96256	-1.54129	-1.42016	-1.13337	-0.83377	-0.893798	-1.0284	-0.885593	-1.6624	-1.45168	-1.83989	-1.64134	-0.189664	0.261057	-0.38821	0.191702		-0.634004	0.0513045	0.142804	0.837701		0.239572	0.774174	0.2996	0.654587
-1.3443	-1.41961	-1.54702	-2.07355	-2.05282	-1.99777	-1.14968	-1.21918	-1.36429	-1.04968	-1.10019	-1.11939	-1.93287	-1.88506	-2.10414	-0.995946	-0.910605	-1.03735	-2.062	-1.85542	-1.82948	-2.45161	-2.44524	-2.38627	-1.53021	-1.46334	-1.55489	-1.43698	-2.04138	-1.24438	-1.08975	-1.97402	-0.981302	-1.91563	-2.42771	-1.51615	0.399484	0.00619752	-0.512074	0.00406706		0.108452	0.0281612	-0.884268	0.00441699		0.192596	0.0491851	-0.604402	0.00583019
-1.32308	-1.51038	-1.58133	-1.24301	-2.25261	-2.35717	-1.72496	-1.99146	-1.96082	-1.71419	-1.49719	-1.76312	-1.76503	-1.42552	-1.9942	-1.74464	-1.90752	-2.03545	-1.28652	-1.21451	-1.37507	-0.771769	-0.817276	-0.360145	-1.13192	-0.942816	-1.30967	-1.4716	-1.95093	-1.89241	-1.65817	-1.72825	-1.89587	-1.29203	-0.64973	-1.12814	0.163896	0.151331	0.642302	0.0111981		-0.237702	0.0510824	-0.0700834	0.806316		-0.420817	0.0123933	-0.479333	0.258247
-1.64218	-2.28836	-2.35378	-2.02859	-1.90186	-1.56347	-1.82816	-1.65501	-1.81652	-2.3985	-2.36883	-2.63624	-2.09145	-2.59276	-2.92074	-2.06172	-2.00616	-2.2169	-2.59333	-2.48987	-2.68043	-2.65261	-2.76101	-2.53047	-3.04514	-2.92566	-2.53812	-2.09477	-1.83131	-1.76656	-2.46786	-2.53498	-2.09493	-2.58788	-2.64803	-2.83631	-0.248433	0.127188	-0.0601549	0.575084		0.372932	0.0108727	-0.0671217	0.871262		0.328212	0.148066	0.263468	0.400949
0.0695574	0.039036	0.103832	0.261071	0.189312	0.23305	0.00230956	0.111349	0.117021	-0.18837	-0.347473	-0.300651	-0.125342	-0.0664318	0.00428557	-0.179878	-0.17825	-0.176589	0.0721338	0.125968	0.140756	0.433438	0.317387	0.632178	0.497925	0.507832	0.367003	0.0708085	0.227811	0.0768933	-0.278831	-0.0624961	-0.178239	0.112953	0.461001	0.457587	0.344634	0.0027776	0.348048	0.0151716		0.100593	0.0439977	0.216335	0.0262183		0.00608476	0.939791	0.157003	0.012482
0.601858	0.623832	0.592058	0.793384	0.864366	0.864941	0.524621	0.534423	0.531671	0.657903	0.727914	0.817177	0.89345	0.838238	0.808603	0.491213	0.487761	0.448264	1.06102	1.12289	1.11502	1.04422	1.08403	0.922012	0.585212	0.617055	0.667428	0.605916	0.840897	0.530238	0.734331	0.846763	0.475746	1.09964	1.01675	0.623232	-0.47641	0.000839286	-0.0828897	0.14768		-0.258585	0.00351041	0.112432	0.0898968		-0.0756779	0.00164871	0.234981	0.00527079
-0.988098	-0.828427	-1.03118	-0.327843	-0.494564	-0.519384	-0.718367	-0.673674	-0.761842	-1.05766	-0.925714	-1.18437	-0.931568	-0.829352	-0.404443	-0.700938	-0.632956	-0.851649	-1.20312	-1.5154	-1.30311	-0.926692	-0.78653	-0.500022	-0.936191	-0.982394	-0.662632	-0.949237	-0.447264	-0.717961	-1.05591	-0.721788	-0.728514	-1.34054	-0.737748	-0.860406	0.480139	0.015347	0.602797	0.0137544		0.327401	0.0128352	0.334127	0.121379		0.231276	0.0143971	0.501973	0.0119449
-1.87892	-2.16317	-1.84851	-2.09163	-2.08653	-1.9801	-2.20787	-2.21569	-1.72423	-1.67059	-1.51745	-1.52869	-1.78006	-1.7672	-1.73614	-3.90678	-1.85804	-1.84822	-1.85773	-1.96834	-2.04156	-1.73265	-2.54538	-1.5721	-2.74485	-1.99255	-1.80407	-1.96353	-2.05275	-2.04927	-1.57224	-1.76113	-2.53768	-1.95588	-1.95004	-2.18049	-0.224611	0.488332	0.00583569	0.992055		-0.96544	0.126458	-0.188891	0.0245506		-0.0857348	0.776293	-0.0892214	0.49271
-0.824781	-0.832484	-1.28747	-0.441937	-1.24955	-1.04003	-1.18893	-0.980116	-1.00254	-1.24785	-1.64434	-1.16111	-2.06847	-1.58467	-1.36067	-1.13035	-1.98544	-1.17175	-1.49257	-1.76162	-1.741	-1.23146	-1.04419	-1.33486	-2.14336	-2.37839	-1.82318	-0.98158	-0.910506	-1.05719	-1.3511	-1.67127	-1.42918	-1.66507	-1.2035	-2.11498	-0.449912	0.0386344	0.461567	0.0141831		-0.0780781	0.902809	-0.320171	0.267272		-0.0756133	0.77356	0.0710739	0.878216
-0.501436	-0.597979	-0.480869	-0.575891	-0.559207	-0.629812	-0.720477	-0.703328	-0.741786	-0.306459	-0.444529	-0.410876	-0.706537	-0.569944	-0.439678	-0.577215	-0.685436	-0.562682	-0.789408	-0.665468	-0.734392	-0.534088	-0.693306	-0.486483	-0.518188	-0.621669	-0.742839	-0.526761	-0.588303	-0.721864	-0.387288	-0.572053	-0.608444	-0.729756	-0.571292	-0.627565	0.102191	0.16004	0.158464	0.0657061		-0.221156	0.00857977	-0.184765	0.0936507		-0.195103	0.00441793	-0.0615424	0.214794
-1.43861	-1.54523	-1.65622	-1.12732	-1.18343	-1.19846	-0.944004	-0.913077	-0.865466	-1.6822	-1.77776	-1.8883	-1.23317	-0.969585	-1.20563	-0.83696	-0.880116	-0.73185	-1.8704	-2.3124	-2.37436	-0.699353	-0.821363	-0.432874	-0.842338	-0.704992	-0.971574	-1.54669	-1.16974	-0.907515	-1.78275	-1.13613	-0.816309	-2.18572	-0.651197	-0.839635	1.34608	0.0023309	1.53452	0.00242788		0.966444	0.000303619	0.646626	0.00752421		0.639172	0.000977077	0.37695	0.0121603
1.73792	1.80135	1.83375	1.73617	1.79387	1.75982	1.31717	1.265	1.29551	1.95465	1.99791	2.03089	1.86467	1.75591	1.76595	1.34305	1.39313	1.3631	2.29159	2.25652	2.21756	1.99702	2.03927	1.85279	1.49154	1.50125	1.55881	1.791	1.76329	1.29256	1.99448	1.79551	1.36642	2.25522	1.96303	1.5172	-0.738021	0	-0.292195	0.00767695		-0.628059	0.000270423	-0.198975	0.01414		-0.498445	0.000426117	-0.0277183	0.486689
-1.03721	-1.01315	-0.903527	-0.62171	-0.628197	-0.575199	-0.598178	-0.651915	-0.635182	-1.3634	-1.41174	-1.5116	-0.912069	-1.01315	-0.978755	-1.01828	-1.09373	-1.16961	-1.31369	-1.4827	-1.24318	-1.16327	-1.21726	-1.29618	-0.836611	-0.807925	-0.944294	-0.984629	-0.608369	-0.628425	-1.42891	-0.96799	-1.09388	-1.34652	-1.22557	-0.862943	0.483581	0.00428509	0.120955	0.16705		0.335033	0.00336682	0.460918	0.00472		0.356204	0.00143654	0.37626	0.00579679
-0.38235	-0.469898	-0.456683	-0.252812	-0.305965	-0.247013	-0.230252	-0.190595	-0.184278	-0.699389	-0.886016	-0.848739	-0.481661	-0.658358	-0.43488	-0.485075	-0.408726	-0.384418	-0.830637	-0.769648	-0.781958	-0.0450156	-0.18748	-0.119063	-0.0444086	-0.311459	-0.173651	-0.43631	-0.268597	-0.201709	-0.811381	-0.524966	-0.426073	-0.794081	-0.117186	-0.176506	0.617575	0.00190926	0.676895	0		0.385309	0.0024966	0.286415	0.035046		0.234602	0.0017504	0.167714	0.0153754
1.57731	1.49855	1.37718	1.45392	1.46481	1.4485	1.57859	1.56851	1.51271	1.40135	1.28379	1.37734	1.53638	1.51073	1.47949	1.51685	1.70105	1.68968	1.61465	1.58732	1.61855	1.69146	1.79175	1.57316	1.44009	1.35205	1.49846	1.48435	1.45575	1.55327	1.35416	1.50887	1.63586	1.60684	1.68546	1.4302	-0.17664	0.011028	0.0786144	0.252608		0.281702	0.00750425	0.154708	0.0215365		0.0689217	0.239278	-0.0286005	0.733562
-1.12879	-1.17763	-1.22284	-1.41071	-1.23699	-0.801937	-0.515578	-0.654166	-0.90424	-0.744025	-0.658034	-0.371266	-2.39807	-0.400217	-0.397065	-0.314726	-0.717302	-0.00525236	-0.655744	-0.512718	-0.550194	-0.974973	-1.5469	-1.27326	-0.670942	-0.500351	-0.411979	-1.17642	-1.14988	-0.691328	-0.591108	-1.06512	-0.34576	-0.572886	-1.26505	-0.527757	0.0451283	0.722494	-0.69216	0.0123368		0.245348	0.244357	-0.474008	0.579556		0.485093	0.0089033	0.0265435	0.931878
0.729254	0.569251	0.342534	-0.15662	-0.0778656	-0.2201	-0.10517	-0.136306	-0.135817	0.415241	0.309266	0.180859	0.116409	0.08902	0.17126	-0.177288	-0.239424	-0.28643	-0.0154397	0.119914	0.0585191	0.507203	0.480475	0.603304	-0.135758	-0.251938	-0.177861	0.547013	-0.151529	-0.125764	0.301789	0.125563	-0.234381	0.0543311	0.530327	-0.188519	-0.24285	0.00743471	0.475996	0.00209337		-0.536169	0.00148452	-0.176226	0.0663026		-0.672777	0.00288052	-0.698542	0.0119757
1.11588	0.950024	1.04409	0.955044	1.06137	1.12975	1.15611	1.12488	1.15902	1.03088	1.12112	1.12951	1.16171	1.23564	1.07035	1.33717	1.21559	1.30347	1.12295	1.15896	1.18505	0.815009	1.06654	0.931194	1.12291	0.908105	0.970657	1.03666	1.04872	1.14667	1.09384	1.1559	1.28541	1.15565	0.93758	1.00056	-0.155096	0.0439046	-0.218073	0.0311702		0.191576	0.00795617	0.062065	0.334196		0.110009	0.048553	0.0120579	0.917378
-0.0473349	-0.140819	-0.0534832	0.0938053	0.00112581	-0.159119	-0.149052	0.0235088	-0.229367	-0.158695	-0.120308	-0.0482261	-0.0318425	-0.120622	-0.117387	0.0678658	0.0882826	0.124964	-0.141078	-0.00677085	-0.0950787	0.0789111	0.113339	-0.0416322	-0.269611	-0.285727	-0.137177	-0.0805458	-0.021396	-0.118304	-0.109076	-0.0899506	0.0937041	-0.0809759	0.0502061	-0.230838	-0.149863	0.0394631	0.131182	0.0708854		0.20278	0.00293049	0.0191257	0.767428		-0.0377577	0.762022	0.0591498	0.557618
0.716085	0.696558	0.696306	0.0361967	0.186733	0.196361	-1.25359	-1.1122	-0.879489	0.584988	0.691283	0.669694	0.161844	0.228748	0.139637	-1.09149	-1.3092	-1.14494	0.583453	0.475633	0.552052	-0.109323	0.0780401	-0.0435004	-1.40102	-1.18964	-1.41746	0.702983	0.139764	-1.08176	0.648655	0.176743	-1.18187	0.537046	-0.0249279	-1.33604	-1.87309	0	-0.561974	0.00210111		-1.83053	0.000307692	-0.471912	0.00373699		-1.78474	0.000456722	-0.563219	0.00583439
-0.603444	-0.701437	-0.71178	-0.525639	-0.559505	-0.482137	-0.269184	-0.234485	-0.278043	-0.52809	-0.526974	-0.509636	-0.624947	-0.473913	-0.599638	-0.0926604	-0.0660801	-0.155638	-0.510371	-0.475925	-0.434142	-0.564094	-0.48096	-0.605515	-0.360079	-0.296568	-0.384422	-0.67222	-0.522427	-0.260571	-0.521567	-0.566166	-0.104793	-0.47348	-0.55019	-0.347023	0.126457	0.0134283	-0.0767101	0.109497		0.416774	0.000253749	-0.0445991	0.407317		0.41165	0.000404697	0.149794	0.0297638
-0.521712	-0.548125	-0.521423	-0.48902	-0.206087	-0.306846	-0.31621	-0.117646	-0.219988	-0.704697	-0.746317	-0.594254	-0.545401	-0.396789	-0.609622	-0.302796	-0.45625	-0.444852	-0.631313	-0.64453	-0.629058	-0.744359	-0.588769	-0.724956	-0.49124	-0.622586	-0.669336	-0.53042	-0.333984	-0.217948	-0.681756	-0.517271	-0.4013	-0.634967	-0.686028	-0.594388	0.0405794	0.497414	-0.051061	0.342356		0.280457	0.00668624	0.164485	0.092996		0.312472	0.0039329	0.196436	0.0803304
0.574237	0.378504	0.396171	0.490333	0.352741	0.262108	1.08974	1.02614	1.18872	0.118486	0.0603676	-0.112434	-0.0108879	0.241751	0.223198	0.908786	0.790207	0.867549	0.265853	0.387995	0.476435	0.160156	0.100434	0.288158	1.37982	1.44042	1.25476	0.449637	0.368394	1.10153	0.0221399	0.151354	0.855514	0.376761	0.182916	1.35833	0.981573	0.000633714	-0.193845	0.0547065		0.833374	0.000649968	0.129214	0.282106		0.651896	0.00142824	-0.081243	0.456816
0.330916	0.411085	0.352076	0.486958	0.521799	0.41187	0.341683	0.302626	0.36901	0.606219	0.56764	0.765594	0.751661	0.826402	0.916357	0.7206	0.657788	0.663882	0.653806	0.813424	0.821775	1.0436	0.954454	1.05752	0.719214	0.59573	0.606101	0.364692	0.473542	0.337773	0.646484	0.831473	0.680757	0.763002	1.01853	0.640348	-0.122654	0.0837388	0.255525	0.0125354		0.0342727	0.722249	0.184989	0.0699464		-0.0269194	0.382075	0.10885	0.0599899
-0.865832	-0.822797	-0.918991	-0.865068	-0.976727	-0.873388	-0.705263	-0.695209	-0.732355	-0.601209	-0.583524	-0.59711	-0.659984	-0.750511	-0.666827	-0.506604	-0.471508	-0.391382	-0.551217	-0.636041	-0.628088	-1.00897	-0.920613	-0.908432	-0.786508	-0.886453	-0.826175	-0.869207	-0.905061	-0.710942	-0.593948	-0.692441	-0.456498	-0.605115	-0.946004	-0.833046	-0.22793	0.00464191	-0.340889	0.00227484		0.13745	0.00797657	-0.098493	0.0322714		0.158264	0.00420129	-0.0358541	0.524519
-0.702096	-0.854396	-0.76786	-0.211332	-0.864488	-1.06821	-0.749072	-0.477894	-0.762109	-0.428487	-0.610627	-0.628761	-0.281622	-0.359285	-1.10784	-0.476023	-0.546972	-1.2561	-0.959025	-0.630189	-1.92698	-1.41407	-0.83328	-0.976	-1.11267	-1.32641	-1.14133	-0.774784	-0.714677	-0.663025	-0.555958	-0.582915	-0.759697	-1.17206	-1.07445	-1.19347	-0.0214059	0.978184	0.0976157	0.891852		-0.203739	0.432521	-0.026957	0.954607		0.111759	0.251009	0.0601067	0.888323
1.24585	1.27859	1.30201	1.22204	1.34219	1.3029	1.25037	1.25994	1.43074	1.398	1.47998	1.56047	1.29681	1.35964	1.18465	1.41871	1.33899	1.46372	1.99431	2.03001	2.01275	1.58275	1.59849	1.44037	1.39064	1.43228	1.47777	1.27548	1.28904	1.31369	1.47948	1.28037	1.40714	2.01236	1.54054	1.43356	-0.578795	0.000616915	-0.471822	0.00162983		-0.0723437	0.176734	-0.199116	0.0453367		0.0382023	0.627622	0.0135593	0.820617
0.513861	0.627579	0.536548	0.775444	0.944002	0.882056	0.836699	0.879704	0.839118	0.685844	0.587476	0.721937	1.0514	0.907026	0.981539	1.17865	1.13062	1.10322	0.716666	0.714367	0.753032	1.0585	1.0186	1.0041	0.759215	0.678894	0.835327	0.55933	0.867167	0.85184	0.665086	0.979988	1.1375	0.728022	1.02707	0.757812	0.0297903	0.616344	0.299047	0		0.472411	0.000733656	0.314902	0.0111195		0.292511	0.00151238	0.307838	0.0152159
0.742326	0.740635	0.791038	0.951276	0.98513	0.950659	0.936087	0.979619	0.958995	1.11811	1.09691	1.14503	1.07389	1.07203	1.20731	1.06738	1.0592	1.03641	1.05959	1.0826	1.04483	0.605946	0.780594	0.772173	0.996395	1.06494	1.12417	0.757999	0.962355	0.958233	1.12002	1.11774	1.05433	1.06234	0.719571	1.06183	-0.000507911	0.994689	-0.34277	0.00591315		-0.0656873	0.00833855	-0.00227396	0.976907		0.200234	0.00098984	0.204356	0.00565289
-0.788298	-0.74856	-0.877024	-0.289883	-0.589916	-0.55156	-0.390703	-0.384634	-0.250028	-0.18535	-0.198958	-0.447446	-0.33226	-0.301906	-0.326902	-0.159431	-0.146295	-0.132945	-0.968447	-1.12008	-0.989877	-1.67569	-1.80328	-1.21624	-1.10517	-0.858227	-0.998366	-0.804627	-0.47712	-0.341788	-0.277251	-0.320356	-0.146224	-1.02614	-1.56507	-0.987254	0.038882	0.770953	-0.538932	0.0311367		0.131028	0.102866	-0.0431047	0.726004		0.462839	0.00155022	0.327507	0.0397773
0.063215	0.143677	0.192708	0.198447	0.201731	0.0369792	-0.0878937	-0.176917	-0.111972	0.234769	0.183738	0.0469725	0.173087	-0.0204847	0.288474	-0.280725	-0.378008	-0.29102	0.0238235	0.193251	0.156566	0.0886447	0.0255947	-0.037117	0.340015	0.501629	0.428027	0.1332	0.145719	-0.125594	0.15516	0.147026	-0.316584	0.124547	0.0257075	0.423224	0.298677	0.0094283	-0.0988394	0.150201		-0.471744	0.00142798	-0.00813444	0.964188		-0.258794	0.00346345	0.0125186	0.909068
2.08336	2.24559	2.20806	2.5258	2.45636	2.35996	1.90205	1.93919	1.97692	1.66155	1.71755	1.57768	1.88762	1.81069	2.04944	1.35157	1.34218	1.31361	2.18798	2.16146	2.16597	2.32582	2.13863	2.20344	2.09302	2.20092	2.11168	2.179	2.44737	1.93939	1.65226	1.91592	1.33578	2.1718	2.22263	2.13521	-0.0365969	0.274728	0.0508285	0.417924		-0.316478	0.00140577	0.263656	0.0345075		-0.239611	0.00713361	0.268373	0.0258708
0.553516	0.638674	0.440436	0.634492	0.779062	0.648973	-0.242806	-0.343619	-0.331756	0.17837	0.198501	0.0958054	0.297556	0.127291	0.253472	-0.71218	-0.730989	-0.864907	0.676432	0.748839	0.663321	0.383745	0.545277	0.666294	-0.204852	-0.332461	-0.267	0.544209	0.687509	-0.30606	0.157559	0.226106	-0.769359	0.696197	0.531772	-0.268104	-0.964302	0.000607843	-0.164425	0.0952512		-0.926917	0.000282051	0.0685475	0.306338		-0.850269	0.000407674	0.1433	0.120319
-0.706554	-0.615059	-0.706142	-0.766146	-0.872591	-0.940135	-0.452451	-0.292929	-0.327558	-0.694858	-0.668015	-0.645517	-0.81114	-0.902906	-0.819342	-0.178874	-0.366595	-0.229981	-0.633733	-0.698254	-0.517	-0.708515	-0.784329	-0.568722	-0.633611	-0.182895	-0.444077	-0.675918	-0.859624	-0.357646	-0.669463	-0.844463	-0.258483	-0.616329	-0.687189	-0.420194	0.196134	0.156799	-0.0708599	0.456599		0.41098	0.00147444	-0.175	0.0117846		0.318272	0.00348576	-0.183706	0.0429935
-0.242834	-0.305757	-0.379873	-0.103981	-0.0942364	-0.135054	0.0683134	0.125297	0.15464	-0.110531	-0.192564	-0.152518	0.0718114	-0.00233054	-0.0139229	0.207625	0.0301566	0.264842	-0.014128	0.0496385	0.0911334	-0.294654	-0.26649	-0.291984	-0.040724	-0.0913208	-0.000323772	-0.309488	-0.111091	0.116084	-0.151871	0.0185193	0.167541	0.0422146	-0.284376	-0.0441229	-0.0863375	0.0558842	-0.32659	0.00126421		0.319412	0.00632365	0.17039	0.014408		0.425571	0.00118381	0.198397	0.017145
1.41131	1.41226	1.44427	2.04333	1.77059	1.7893	2.20025	2.19768	2.2729	0.891741	0.857026	0.836184	1.44963	1.57454	1.58061	1.9123	1.84126	1.86237	1.30519	1.40234	1.4167	2.61779	2.35927	2.72189	2.33017	2.36677	2.12747	1.42261	1.86774	2.22361	0.86165	1.53493	1.87197	1.37474	2.56632	2.2748	0.900062	0.000784067	1.19158	0.00136709		1.01032	0	0.673277	0.00376608		0.800994	0	0.445124	0.015492
-1.65151	-1.84901	-1.73568	-1.50808	-1.542	-1.56847	-1.6631	-1.51298	-1.8416	-1.79874	-1.99796	-2.02966	-1.70948	-1.45863	-1.47951	-1.64859	-1.72384	-1.78261	-1.71102	-1.69152	-1.69377	-1.39191	-1.40095	-1.08497	-1.30549	-1.28622	-1.48784	-1.7454	-1.53952	-1.67256	-1.94212	-1.54921	-1.71835	-1.69877	-1.29261	-1.35985	0.338922	0.00541213	0.406162	0.0135954		0.223774	0.0232349	0.392912	0.0254802		0.0728383	0.597231	0.205882	0.0339252
0.448329	0.704439	0.607187	0.744074	0.876793	0.773897	0.497264	0.384274	0.432065	0.491552	0.562349	0.668008	1.03431	0.718669	0.89725	0.583427	0.62733	0.635393	0.56873	0.676519	0.577108	0.954658	0.92158	0.640315	0.707113	0.442504	0.640766	0.586651	0.798254	0.437868	0.573969	0.88341	0.615383	0.607452	0.838851	0.596794	-0.0106579	0.949925	0.231399	0.0663496		0.0414141	0.456109	0.309441	0.0422644		-0.148784	0.080731	0.211603	0.0711849
0.0261834	0.0736296	0.0998209	-0.54809	-0.530463	-0.491181	-0.355942	-0.429175	-0.343139	0.266895	0.275659	0.349473	-0.203209	-0.296904	-0.38885	-0.240238	-0.267467	-0.255786	0.323522	0.23543	0.278654	-0.284579	-0.0617828	-0.324889	-0.309144	-0.21383	-0.242044	0.0665446	-0.523245	-0.376085	0.297342	-0.296321	-0.254497	0.279202	-0.22375	-0.255006	-0.534208	0.000884956	-0.502952	0.00595249		-0.551839	0.000193548	-0.593663	0.00444444		-0.44263	0.000401891	-0.58979	0.00246154
3.67913	3.63048	3.63927	3.75834	3.83853	3.78727	3.80967	3.81212	3.8558	3.61297	3.63144	3.51683	3.88975	3.86595	3.9561	3.9536	3.87456	3.9223	3.44483	3.40765	3.42157	3.82755	3.72542	3.73794	3.72717	3.77503	3.76268	3.64963	3.79471	3.82586	3.58708	3.90394	3.91682	3.42468	3.76364	3.75496	0.330276	0.000807818	0.338954	0.00139873		0.329739	0.00126965	0.316853	0.00583884		0.176237	0.0014316	0.145087	0.0140567
-1.06933	-1.06147	-1.13207	-1.34984	-1.43678	-1.09794	-0.665745	-0.654774	-0.832481	-0.907857	-0.808017	-0.798042	-1.11747	-1.32714	-1.3705	-0.526016	-0.497147	-0.567163	-1.06863	-1.09455	-1.14294	-1.79797	-1.57276	-1.58898	-1.19482	-1.26014	-1.10471	-1.08762	-1.29485	-0.717666	-0.837972	-1.2717	-0.530108	-1.10204	-1.65324	-1.18656	-0.0845176	0.100717	-0.551198	0.0028455		0.307864	0.00142663	-0.433729	0.0131681		0.369958	0.00279479	-0.207229	0.115186
-3.25147	-2.81511	-2.541	-2.13223	-2.22777	-1.90948	-3.03762	-2.61344	-2.34727	-2.98395	-2.44888	-2.88999	-2.4814	-2.29166	-2.39	-2.30473	-2.60865	-2.44539	-2.88763	-2.7683	-2.55403	-2.42263	-2.32238	-2.29973	-2.61557	-2.18674	-2.45839	-2.86919	-2.08983	-2.66611	-2.77427	-2.38769	-2.45292	-2.73665	-2.34825	-2.42023	0.316423	0.0668525	0.388409	0.0150827		0.321353	0.0775275	0.386586	0.0837523		0.203086	0.54629	0.779364	0.034296
-0.43763	-0.343007	-0.436235	-0.0726857	-0.20098	-0.30278	-0.304173	-0.374395	-0.314663	-0.356087	-0.365758	-0.257223	-0.177347	-0.172999	0.0037291	-0.217422	-0.264327	-0.142111	-0.913047	-0.860037	-0.948313	-0.601876	-0.756368	-0.649009	-0.692919	-0.576541	-0.559341	-0.405624	-0.192149	-0.331077	-0.326356	-0.115539	-0.207953	-0.907133	-0.669084	-0.609601	0.297532	0.00382813	0.238048	0.00941544		0.118403	0.0330387	0.210817	0.039405		0.074547	0.0695711	0.213476	0.0503579
-3.21665	-1.45009	-3.37536	-1.40713	-0.807981	-0.982478	0.347999	0.544977	0.186666	-1.37292	-1.09406	-1.50582	-0.918519	-0.564602	-0.829647	-0.575624	-0.0312729	0.0299087	-0.383585	-0.341398	-0.633014	-0.204245	-0.405678	-0.255136	-1.85879	-0.498022	-1.15683	-2.6807	-1.06586	0.359881	-1.32427	-0.770923	-0.19233	-0.452666	-0.288353	-1.17121	-0.718546	0.0881587	0.164313	0.165069		1.13194	0.00445317	0.553343	0.0302475		3.04058	0.00543346	1.61484	0.0702301
-1.81117	-2.0166	-1.68001	-2.01813	-2.12535	-1.90755	-2.43081	-2.23834	-2.34509	-2.12421	-2.3277	-2.323	-2.07844	-2.18911	-1.95103	-2.38411	-2.36017	-2.72766	-2.41135	-2.2047	-2.05424	-2.11541	-1.76338	-1.24328	-2.16	-1.81527	-2.10592	-1.83593	-2.01701	-2.33808	-2.2583	-2.07286	-2.49065	-2.22343	-1.70736	-2.02706	0.196368	0.176031	0.516072	0.0979148		-0.232347	0.0794146	0.185441	0.114721		-0.502154	0.00723982	-0.181085	0.192122
-0.69219	-0.774941	-0.684231	-0.452187	-0.484344	-0.475101	-0.244174	-0.17987	-0.270322	-0.333931	-0.31607	-0.48132	-0.179484	-0.316157	-0.0665066	-0.147445	-0.164888	-0.189985	-0.811983	-0.845375	-0.71602	-0.338914	-0.443608	-0.455551	-0.298042	-0.190905	-0.232921	-0.717121	-0.470544	-0.231455	-0.377107	-0.187382	-0.167439	-0.791126	-0.412691	-0.240623	0.550503	0.000806034	0.378435	0.00322705		0.209668	0.00855502	0.189725	0.0921862		0.485665	0.000370774	0.246577	0.00618124
1.61206	1.70664	1.68522	1.69994	1.75024	1.73711	0.950613	0.915816	0.923731	1.79278	1.83819	1.95274	1.77973	1.612	1.62578	0.944863	0.963828	0.968606	2.32529	2.30487	2.2053	2.34309	2.2942	2.04921	0.777683	0.811411	0.899584	1.66797	1.7291	0.930053	1.86124	1.6725	0.959099	2.27849	2.22883	0.829559	-1.44893	0	-0.0496554	0.722324		-0.902137	0.000378007	-0.188733	0.0550967		-0.737921	0	0.0611219	0.129682
-1.92477	-1.87473	-1.86866	-2.48754	-1.82006	-2.12762	-2.01984	-2.34117	-2.16434	-1.7358	-1.83873	-1.91347	-1.91659	-1.89061	-2.13236	-1.96216	-2.53394	-2.13908	-2.01683	-2.16556	-1.86008	-1.62918	-2.45614	-1.74182	-1.74274	-1.74489	-1.94187	-1.88939	-2.14507	-2.17512	-1.82933	-1.97986	-2.21172	-2.01416	-1.94238	-1.80983	0.204326	0.0795682	0.0717796	0.872956		-0.38239	0.0425884	-0.150524	0.16368		-0.285732	0.0210819	-0.255686	0.257862
-0.818872	-0.398787	-0.79801	-0.0955806	-0.219063	-0.187125	0.224742	0.257916	0.366878	-0.962787	-0.904782	-1.0044	-0.278302	-0.464707	-0.307088	0.364367	0.433537	0.352275	-0.649765	-0.751115	-0.821498	-0.497904	-0.371801	-0.461208	-0.0203955	-0.0440085	0.152337	-0.67189	-0.167256	0.283179	-0.957325	-0.350032	0.383393	-0.740793	-0.443638	0.0293109	0.770103	0.000934708	0.297155	0.00804657		1.34072	0.000761905	0.607293	0.00475182		0.955068	0.00214085	0.504634	0.0315993
-0.438409	-0.337613	-0.33015	-0.755166	-0.652227	-0.748357	-0.202397	-0.162994	-0.136269	-0.193511	-0.156736	-0.335465	-0.461965	-0.620088	-0.638131	-0.0731039	-0.108164	-0.0375028	-0.172548	-0.222539	-0.178069	-0.821131	-0.698897	-0.897931	-0.112241	-0.118491	-0.0705767	-0.368724	-0.718583	-0.16722	-0.228571	-0.573395	-0.0729235	-0.191052	-0.805986	-0.100436	0.090616	0.0104349	-0.614934	0.0012621		0.155647	0.024496	-0.344824	0.0166899		0.201504	0.00496061	-0.34986	0.00802581
1.13854	1.13694	1.10978	0.563058	0.625584	0.6184	0.322849	0.372268	0.344475	0.994021	1.03159	1.06147	0.697665	0.538047	0.521153	0.368705	0.369107	0.370873	1.06899	1.05845	1.02089	0.746955	0.8228	0.6923	0.188174	0.204597	0.322308	1.12842	0.602347	0.346531	1.02903	0.585622	0.369562	1.04944	0.754018	0.23836	-0.811084	0.000789809	-0.295425	0.00284792		-0.659464	0.000705882	-0.443405	0.00483616		-0.781891	0	-0.526074	0
-2.33339	-1.09165	-0.982744	-1.29122	-0.962696	-1.34369	-1.62098	-1.96965	-1.86516	-0.826919	-0.225364	-0.399681	-0.402203	-0.490125	-0.47124	-0.886374	-1.14711	-1.15523	0.0473778	-0.158325	-0.12783	-0.240227	-0.274583	-0.535602	-1.47045	-1.73861	-1.39505	-1.46926	-1.1992	-1.8186	-0.483988	-0.454523	-1.06291	-0.0795923	-0.350137	-1.5347	-1.45511	0.000621118	-0.270545	0.0522501		-0.578917	0.0194472	0.0294656	0.924423		-0.349335	0.46378	0.270058	0.65833
-0.113006	-0.21815	-0.197428	-0.0851793	-0.106431	-0.107765	-0.193146	-0.194443	-0.199896	0.138201	0.146739	-0.00805497	0.189789	0.179426	0.206867	0.197235	0.212639	0.138248	-0.235146	-0.221985	-0.27612	0.320587	0.248456	0.480488	0.202751	0.12918	0.0787182	-0.176195	-0.0997915	-0.195828	0.0922947	0.192027	0.182707	-0.244417	0.349844	0.136883	0.3813	0.000923599	0.594261	0.00212263		0.0904126	0.0870389	0.0997325	0.111113		-0.0196331	0.646738	0.0764034	0.0834612
-0.0482757	-0.10601	-0.144499	0.0731521	0.210355	0.141299	-0.0423639	-0.0831959	-0.0407522	-0.335987	-0.221791	-0.122905	0.218381	0.190188	0.143129	-0.00477934	0.100994	0.0506635	-0.119203	-0.258025	-0.411866	0.373347	0.366181	0.1276	-0.254676	-0.474916	-0.26748	-0.0995948	0.141602	-0.0554373	-0.226894	0.183899	0.0489593	-0.263032	0.289043	-0.332357	-0.0693254	0.625038	0.552074	0.00822025		0.275854	0.00765796	0.410793	0.00759288		0.0441575	0.14558	0.241197	0.0158113
-2.26925	-2.22409	-2.13226	-2.14649	-2.1184	-2.17911	-2.33097	-2.03802	-2.33508	-2.10991	-2.13308	-2.39533	-2.52751	-2.91258	-2.00489	-2.5658	-2.07297	-2.21461	-2.52042	-2.41141	-2.35759	-2.21121	-2.06922	-1.92058	-2.40849	-2.48519	-2.0988	-2.20853	-2.148	-2.23469	-2.21278	-2.48166	-2.28446	-2.4298	-2.067	-2.33082	0.0989803	0.481847	0.362801	0.0146244		-0.0716879	0.815529	-0.26888	0.396498		-0.0261545	0.894871	0.0605317	0.240196
-0.467214	-0.48468	-0.593911	-0.503626	-0.658836	-0.599836	-0.794251	-0.642904	-0.781523	-0.14333	-0.108516	-0.163672	-0.442415	-0.638602	-0.316924	-0.485358	-0.559918	-0.638699	-0.103115	-0.225497	-0.212404	-0.410836	-0.221895	-0.388914	-0.633044	-0.577563	-0.279051	-0.515268	-0.587433	-0.739559	-0.138506	-0.46598	-0.561325	-0.180339	-0.340548	-0.496553	-0.316214	0.0301187	-0.160209	0.0618326		-0.422819	0.000835761	-0.327474	0.0296374		-0.224291	0.0131563	-0.0721643	0.302316
0.807131	0.851386	0.863637	0.925534	1.01993	0.920648	1.17574	1.13978	1.09443	0.783647	0.833683	0.926658	0.957081	0.846994	0.758009	1.24283	1.29094	1.28759	1.09127	1.09937	1.04583	0.860354	0.946579	0.740334	1.01324	0.935428	1.03136	0.840718	0.955372	1.13665	0.847996	0.854028	1.27379	1.07883	0.849089	0.993342	-0.0854841	0.0363087	-0.229737	0.0150902		0.425792	0.000723933	0.00603191	0.961201		0.295931	0.000704025	0.114654	0.0421242
0.261328	0.295139	0.193208	0.560872	0.334294	0.522688	0.546245	0.617581	0.69699	0.524959	0.757991	0.382925	0.763655	0.805371	0.670495	0.463419	0.562071	0.5956	0.723493	0.812721	0.867348	0.73869	0.57118	0.950101	0.45543	0.286715	0.324266	0.249892	0.472618	0.620272	0.555292	0.746507	0.540363	0.801187	0.753324	0.35547	-0.445717	0.00296128	-0.0478635	0.788684		-0.0149283	0.951706	0.191215	0.160863		0.37038	0.00206072	0.222726	0.0495156
0.252195	-0.302656	-0.228438	0.0936093	0.143745	-0.101531	-0.202692	-0.0427239	-0.290753	-0.187227	-0.459125	-0.0117829	-0.0825841	-1.09322	-0.163892	-0.25606	-0.510179	-0.305603	-0.0866578	-0.337199	-0.0786226	-1.22324	-2.78902	-0.803021	-0.705858	-0.658504	-0.469022	-0.0929662	0.0452744	-0.178723	-0.219378	-0.446566	-0.35728	-0.167493	-1.60509	-0.611128	-0.443635	0.0113138	-1.4376	0.0544308		-0.137902	0.325682	-0.227188	0.61719		-0.0857566	0.772452	0.138241	0.565529
-0.541002	-0.525084	-0.405184	-0.535088	-0.490491	-0.487923	0.134558	0.211748	0.205022	-0.673608	-0.616547	-0.635039	-0.740328	-0.465116	-0.599272	-0.0476975	-0.0779595	-0.0963244	-0.520203	-0.436647	-0.418011	-0.44933	-0.373555	-0.684359	-0.110649	-0.262652	-0.169105	-0.490423	-0.504501	0.183776	-0.641731	-0.601572	-0.0739938	-0.458287	-0.502414	-0.180802	0.277485	0.00606631	-0.0441273	0.762867		0.567737	0.000325424	0.0401591	0.731885		0.674199	0.000443286	-0.0140773	0.84452
0.0785153	-0.236284	0.000804663	-0.230263	-0.391621	-0.624937	-0.813372	-0.904824	-0.756241	0.0504096	-0.050056	0.0846303	-0.24342	-0.116686	-0.197752	-0.898921	-0.525651	-1.05639	-0.311649	-0.577853	-0.398514	-0.40735	-0.921885	-0.506209	-0.53741	-0.265991	-0.410164	-0.0523214	-0.415607	-0.824812	0.0283279	-0.185953	-0.826988	-0.429338	-0.611815	-0.404521	0.0248169	0.904756	-0.182476	0.343337		-0.855316	0.00366108	-0.214281	0.0217236		-0.772491	0.00190271	-0.363286	0.0742604
0.129418	-0.00519538	0.163157	0.0567884	-0.0359879	0.0467672	0.073981	0.192626	0.232661	0.808961	0.472705	0.487656	0.239721	0.320458	0.406877	0.0138397	-0.0872693	0.167951	0.221548	0.371022	0.537855	0.324399	0.244479	0.358657	0.389663	0.892177	0.384582	0.0957932	0.0225226	0.166423	0.589774	0.322352	0.031507	0.376809	0.309178	0.555474	0.178665	0.354543	-0.0676303	0.576539		-0.558267	0.00658364	-0.267422	0.0832325		0.0706294	0.293606	-0.0732706	0.288013
-0.431192	-0.28406	-0.442856	-0.0824971	-0.207728	-0.11103	-0.67851	-0.727565	-0.586347	-0.163651	-0.12139	-0.115165	-0.111247	0.00175261	-0.00922513	-0.298449	-0.43765	-0.272326	-0.176487	0.0898015	0.0800664	0.0297158	-0.00356531	0.224098	-0.603112	-0.30105	-0.456838	-0.386036	-0.133752	-0.664141	-0.133402	-0.0395731	-0.336142	-0.00220625	0.0834161	-0.453667	-0.45146	0.0138031	0.0856223	0.527165		-0.20274	0.00919535	0.0938289	0.0699215		-0.278105	0.00832488	0.252284	0.0248851
0.233192	0.231872	0.232131	0.384365	0.272165	0.253975	0.314366	0.303805	0.31479	0.334125	0.31248	0.21114	0.372023	0.342284	0.478627	0.425933	0.509199	0.417665	0.348674	0.301901	0.301219	-0.000689268	-0.0735893	0.0703378	0.570196	0.608962	0.538682	0.232399	0.303502	0.310987	0.285915	0.397645	0.450932	0.317265	-0.00131361	0.572614	0.255349	0.000981064	-0.318578	0.00301645		0.165017	0.0115198	0.11173	0.107501		0.0785882	0	0.0711033	0.153319
-2.12491	-0.675229	-0.496388	-1.18343	-1.90713	-1.65261	0.222235	0.0891254	0.0544069	-1.01116	-1.05502	-1.03364	-0.600881	-2.42371	-0.54973	-0.23046	0.158728	-0.690773	-0.609839	-0.54039	-0.897974	-0.536918	-0.0207472	-0.211545	0.263249	-0.540764	-0.411547	-1.09884	-1.58106	0.121922	-1.03327	-1.19144	-0.254169	-0.682734	-0.256403	-0.229687	0.453047	0.103697	0.426331	0.059336		0.779106	0.014777	-0.158164	0.875326		1.22077	0.0419927	-0.482214	0.474292
-1.16192	-1.20347	-1.13461	-1.73429	-1.7282	-1.95001	-1.26708	-1.73716	-1.82755	-1.08248	-1.16574	-1.12528	-1.74688	-1.32267	-1.31437	-1.27626	-1.07173	-1.08651	-1.15467	-1.39382	-1.45807	-1.41356	-1.51755	-1.33495	-1.1978	-1.50769	-1.20846	-1.16667	-1.80416	-1.6106	-1.1245	-1.46131	-1.14484	-1.33552	-1.42202	-1.30465	0.030867	0.90433	-0.086503	0.488124		-0.0203358	0.884707	-0.336806	0.0756526		-0.443931	0.0340896	-0.637495	0.00592908
0.321646	0.378952	0.42698	0.374286	0.332169	0.533081	0.503963	0.599427	0.567884	0.627144	0.756026	0.666643	0.648816	0.662924	0.561417	0.766967	0.695355	0.818908	0.555069	0.659241	0.535668	0.0191634	0.219976	0.0278249	0.634336	0.602944	0.656736	0.375859	0.413178	0.557091	0.683271	0.624386	0.76041	0.583326	0.0889881	0.631339	0.0480125	0.234698	-0.494338	0.00460742		0.0771391	0.112431	-0.0588853	0.290168		0.181232	0.00753167	0.0373188	0.695329
2.1439	2.29815	2.22492	2.58052	2.641	2.60661	2.29587	2.37616	2.28135	2.1384	2.0697	2.31045	2.51639	2.53706	2.46097	2.46099	2.3717	2.39353	2.40025	2.39251	2.46294	2.54111	2.53447	2.47305	2.51243	2.29067	2.36451	2.22232	2.60938	2.31779	2.17285	2.5048	2.40874	2.41857	2.51621	2.38921	-0.029361	0.788941	0.0976418	0.0249527		0.23589	0.0161055	0.331955	0.0166441		0.0954688	0.0852235	0.387057	0.00621086
-1.44717	-1.38112	-1.5874	-1.08578	-1.27192	-1.01501	-0.599825	-0.601386	-0.562748	-2.44721	-2.04849	-1.47251	-1.03756	-2.0986	-1.36711	-2.08813	-1.10057	-1.37659	-1.11011	-1.0701	-1.35934	-1.7876	-1.72922	-2.12244	-1.07121	-0.918414	-1.06449	-1.4719	-1.12423	-0.587986	-1.98941	-1.50109	-1.52176	-1.17985	-1.87975	-1.01804	0.161813	0.120339	-0.699904	0.00871637		0.467643	0.200741	0.488315	0.301048		0.883911	0.000352774	0.347662	0.0317377
0.893551	0.756062	0.733873	0.944134	0.95458	1.00104	1.00342	1.04578	1.04888	0.464594	0.638409	0.534614	0.632056	0.724069	0.618835	0.568932	0.752133	0.745781	0.453003	0.137137	0.338788	0.984379	1.07176	0.791349	0.567371	0.315019	0.614197	0.794495	0.966584	1.03269	0.545873	0.65832	0.688949	0.309643	0.949163	0.498862	0.18922	0.144308	0.639521	0.0070378		0.143076	0.0672933	0.112448	0.123083		0.238196	0.00653406	0.172089	0.0392
-1.14116	-1.14563	-1.08173	-0.914749	-0.985022	-0.925489	-0.631814	-0.706201	-0.783067	-1.1393	-1.0876	-1.18554	-0.728193	-0.817218	-0.708604	-0.478852	-0.538926	-0.559016	-0.817505	-0.798511	-0.788817	-0.519569	-0.540114	-0.571761	-0.289372	-0.246423	-0.271771	-1.12284	-0.941753	-0.707027	-1.13748	-0.751338	-0.525598	-0.801611	-0.543815	-0.269189	0.532422	0	0.257797	0		0.611884	0.000292553	0.386143	0.0047104		0.415812	0.00122565	0.181086	0.011216
-0.215778	0.0570128	-0.138727	-0.0915651	-0.134024	0.0997996	-1.88069	-0.380223	-0.320771	-1.58213	-0.647134	-0.321243	-0.18268	-0.0629456	-0.496525	-0.605908	-0.401182	-0.547409	0.206824	0.288642	0.1428	0.403023	0.642786	0.372833	0.378434	-0.0255878	0.253489	-0.0991639	-0.0419297	-0.860562	-0.850169	-0.247384	-0.518167	0.212755	0.472881	0.202112	-0.0106432	0.967824	0.260125	0.0372185		0.332003	0.36073	0.602786	0.190803		-0.761398	0.133077	0.0572342	0.706959
-2.60272	-1.81275	-2.43039	-2.58169	-2.42112	-1.97685	-2.85652	-2.47497	-1.59421	-2.46863	-2.75278	-2.86986	-2.02127	-1.77634	-1.72993	-1.63846	-1.86075	-1.89839	-1.75413	-1.73085	-2.00917	-1.40799	-2.12402	-1.98351	-1.43687	-1.44795	-1.46731	-2.28195	-2.32655	-2.30857	-2.69709	-1.84251	-1.7992	-1.83138	-1.83851	-1.45071	0.380673	0.00961243	-0.00712395	0.987224		0.897891	0.00231261	0.854576	0.00910968		-0.0266128	0.975392	-0.0445977	0.929901
-0.53287	-0.752062	-0.103748	-0.22371	0.236732	0.219696	0.234368	-0.0353277	0.0620234	-0.4408	-0.135118	-0.435095	-0.294836	-0.187687	-0.263789	-0.192164	-0.280143	-0.448753	-0.454643	-0.227395	-0.418402	-0.231508	-0.472424	-0.204694	-0.459285	-0.673808	-0.291352	-0.462893	0.0775725	0.0870211	-0.337004	-0.248771	-0.30702	-0.366813	-0.302875	-0.474815	-0.108002	0.440365	0.063938	0.666949		0.0299842	0.906745	0.0882334	0.481383		0.549914	0.0298773	0.540466	0.0908074
-0.0227716	-0.468857	-0.312707	-0.298647	-0.261606	0.00885677	1.49483	1.33354	1.41691	-0.195345	0.342266	0.107407	-0.42446	-0.0693905	-0.220313	1.20316	1.49269	1.36672	-0.0155203	-0.0733063	-0.177397	-0.922065	-0.918068	-1.27497	0.707408	0.251454	0.284679	-0.268112	-0.183799	1.41509	0.0847759	-0.238055	1.35419	-0.0887412	-1.03837	0.414514	0.503255	0.0186529	-0.949626	0.00285917		1.26941	0.00149051	-0.322831	0.143816		1.6832	0.000361318	0.0843132	0.713118
-0.410377	-0.37248	-0.273487	-0.329838	-0.45989	-0.44442	-0.55905	-0.668141	-0.555435	-0.613703	-0.690557	-0.727029	-0.564571	-0.615069	-0.430606	-0.808694	-0.67672	-0.724655	-0.344236	-0.353662	-0.401554	-0.256322	-0.35018	-0.425038	-0.589472	-0.359555	-0.536283	-0.352115	-0.411383	-0.594209	-0.677096	-0.536749	-0.73669	-0.366484	-0.343847	-0.495103	-0.128619	0.0865474	0.0226375	0.769765		-0.0595935	0.192673	0.140348	0.0869992		-0.242094	0.00748323	-0.0592682	0.382705
0.340391	0.20959	0.172284	-0.0267916	0.0882773	0.0781703	-0.38723	-0.364509	-0.34876	0.290492	0.387848	0.317245	0.221547	0.117643	0.134958	-0.139029	-0.317833	-0.168515	0.0060308	-0.0425847	-0.130197	0.0621793	0.247895	0.0430484	-0.386225	-0.468608	-0.41204	0.240755	0.046552	-0.366833	0.331862	0.15805	-0.208459	-0.0555837	0.117707	-0.422291	-0.366707	0.0018825	0.173291	0.0608676		-0.540321	0.00092546	-0.173812	0.0205306		-0.607588	0.000333007	-0.194203	0.0439113
0.913128	0.922844	0.997977	-0.18687	-0.235111	-0.351853	-0.238762	-0.320028	-0.274292	0.852422	0.911761	0.955209	-0.55675	-0.687378	-0.559521	-0.563956	-0.433659	-0.390395	0.640298	0.589875	0.755697	-0.0791347	-0.148302	-0.20604	-0.421161	-0.224842	-0.256844	0.944649	-0.257945	-0.277694	0.906464	-0.601216	-0.46267	0.661957	-0.144492	-0.300949	-0.962906	0.000664011	-0.806449	0.00027381		-1.36913	0.000250653	-1.50768	0		-1.22234	0	-1.20259	0.0024
-0.639095	-0.552237	-0.829309	-1.00009	-0.8676	-0.870252	-0.860926	-0.941827	-0.959116	-0.288255	-0.316726	-0.288104	-0.629338	-0.604412	-0.748197	-0.567902	-0.588068	-0.598368	-0.404828	-0.379237	-0.428511	-0.832984	-0.560055	-0.819804	-0.793981	-0.905011	-0.7521	-0.673547	-0.912646	-0.920623	-0.297695	-0.660649	-0.584779	-0.404192	-0.737614	-0.817031	-0.412839	0.00177551	-0.333422	0.0150883		-0.287084	0.000233577	-0.362954	0.00451697		-0.247076	0.0249164	-0.2391	0.0667831
-3.18113	-1.68503	-2.89995	-2.36456	-2.44608	-3.15227	-2.93762	-1.93764	-1.90035	-0.952375	-0.973105	-0.965971	-1.887	-1.27912	-1.18484	-1.14178	-1.88682	-1.96723	-1.32971	-0.974775	-1.00466	-1.91157	-2.44044	-2.24052	-0.993774	-1.31824	-1.4961	-2.5887	-2.6543	-2.25854	-0.963817	-1.45032	-1.66528	-1.10305	-2.19751	-1.26937	-0.166325	0.383152	-1.09447	0.00610034		-0.701463	0.0246198	-0.486504	0.0846454		0.330166	0.677407	-0.0656005	0.941266
0.0403378	0.0650761	-0.0939629	0.310385	0.0898981	0.455546	0.395787	0.350476	0.338757	0.377682	0.506737	0.306246	0.495527	0.678983	0.317796	0.396845	0.516973	0.548734	0.506009	0.531017	0.452532	0.226354	0.506351	0.409904	0.229417	0.379983	0.407645	0.003817	0.285276	0.361674	0.396888	0.497435	0.487517	0.496519	0.38087	0.339015	-0.157504	0.0328368	-0.115649	0.207576		0.0906288	0.17824	0.100547	0.476569		0.357857	0.00215442	0.281459	0.0773546
0.5831	0.360594	0.49212	0.0600972	0.404602	0.34994	0.494003	0.502708	0.782425	0.697939	0.42708	0.800233	0.244459	0.335901	0.163097	0.390974	0.420526	0.43754	0.780137	0.802692	0.79193	0.142546	0.504529	0.110153	0.652111	0.563052	0.711509	0.478605	0.271546	0.593045	0.64175	0.247819	0.416347	0.791586	0.25241	0.642224	-0.149362	0.0165158	-0.539177	0.0110482		-0.225404	0.0525333	-0.393931	0.035007		0.114441	0.298711	-0.207058	0.170516
0.262488	0.201592	0.194996	0.0443697	0.115731	0.114297	0.0432093	-0.00702691	0.0673354	0.24124	0.254047	0.298256	0.231147	0.174331	0.131565	0.224445	0.220746	0.174747	0.324531	0.29285	0.255518	0.229318	0.281085	0.111784	0.00107837	-0.0371587	0.0489993	0.219692	0.091466	0.0345059	0.264514	0.179014	0.206646	0.290966	0.207396	0.00430632	-0.28666	0.00168389	-0.0835702	0.154512		-0.0578678	0.0304429	-0.0854998	0.0601399		-0.185186	0.00276343	-0.128226	0.0245269
0.644476	0.554749	0.690995	0.559317	0.42933	0.586439	0.451633	0.393744	0.485815	0.463471	0.524705	0.675854	0.640127	0.866013	0.658451	0.738211	0.69204	0.899104	0.71918	0.502673	0.872562	0.810757	0.906533	0.853679	0.489014	0.578	0.36867	0.630073	0.525028	0.443731	0.554677	0.72153	0.776452	0.698139	0.85699	0.478561	-0.219577	0.0881416	0.158851	0.183697		0.221775	0.0294036	0.166854	0.142664		-0.186343	0.0108891	-0.105045	0.167394
1.32559	1.00271	1.03131	1.31949	1.33593	1.33522	1.68329	1.68414	1.67891	0.330178	0.280586	0.176353	1.01889	1.08041	1.02813	1.41487	1.35713	1.49533	0.465364	0.416976	0.608295	1.9427	1.67367	1.8071	1.6249	1.51734	1.49456	1.11987	1.33021	1.68211	0.262372	1.04247	1.42244	0.496878	1.80782	1.5456	1.04872	0.00103734	1.31094	0.00029582		1.16007	0.000398551	0.780103	0.00240559		0.562243	0.00382935	0.21034	0.110147
1.03764	0.964933	0.957077	0.910467	1.04846	1.11042	0.988265	0.944482	0.998379	0.980013	1.05812	1.07545	1.01714	0.932505	0.870557	1.1108	1.05973	1.089	1.24943	1.15781	1.13508	0.792014	0.862565	0.710424	0.885949	0.728246	0.873414	0.986551	1.02312	0.977042	1.03786	0.940067	1.08651	1.18078	0.788334	0.829203	-0.351572	0.00471925	-0.392441	0.00332911		0.0486439	0.111547	-0.0977968	0.119143		-0.00950877	0.862417	0.0365663	0.681683
-0.554538	-0.632513	-0.446578	-0.436989	-0.330771	-0.432302	-0.583084	-0.586241	-0.736986	-0.73564	-0.652368	-0.580608	-0.585184	-0.54504	-0.512226	-0.362624	-0.401435	-0.147664	-0.474638	-0.474405	-0.514652	-0.775711	-0.704158	-0.693863	-0.740722	-0.765123	-0.561574	-0.544543	-0.400021	-0.635437	-0.656205	-0.547483	-0.303907	-0.487898	-0.724577	-0.68914	-0.201242	0.021688	-0.236679	0.00226288		0.352298	0.00862899	0.108722	0.0855875		-0.0908936	0.195885	0.144522	0.0882597
-0.890016	-0.945823	-1.03234	-0.746953	-0.638809	-0.762896	-0.576766	-0.65242	-0.599663	-1.1918	-1.50785	-1.43744	-1.44649	-1.55312	-2.42107	-1.44076	-2.31436	-1.65807	-0.60804	-0.58254	-0.448875	-0.871143	-0.590724	-0.880219	-0.92233	-0.903424	-0.846507	-0.95606	-0.716219	-0.609616	-1.37903	-1.80689	-1.8044	-0.546485	-0.780695	-0.890754	-0.344269	0.00338593	-0.23421	0.0666593		-0.425368	0.104573	-0.427864	0.242772		0.346444	0.00194013	0.239841	0.0220497
0.955747	0.939692	0.942158	1.00558	1.05066	0.984807	0.574051	0.660325	0.599885	0.882822	0.803357	0.837769	0.913145	0.903485	0.887971	0.638968	0.666093	0.598219	0.946528	0.985568	0.946431	1.0963	1.13539	1.06144	0.844353	0.674251	0.747957	0.945866	1.01368	0.61142	0.841316	0.901534	0.634427	0.959509	1.09771	0.75552	-0.203989	0.01113	0.138199	0.00637574		-0.206889	0.00168671	0.0602175	0.0633698		-0.334446	0.000400471	0.067817	0.0358702
-1.78862	-2.12928	-2.2458	-1.92223	-1.93381	-2.3904	-2.43242	-2.21896	-1.61382	-2.29939	-1.99067	-2.31012	-1.88411	-2.03019	-1.49324	-1.94757	-1.97871	-2.12972	-2.64902	-2.42467	-1.61356	-1.44092	-1.25926	-1.57019	-1.30335	-0.997926	-1.54453	-2.05457	-2.08215	-2.0884	-2.20006	-1.80251	-2.01867	-2.22908	-1.42346	-1.28194	0.947144	0.0308117	0.805621	0.0489096		0.181394	0.103892	0.397546	0.0979798		-0.0338341	0.949948	-0.0275829	0.93734
1.35901	1.4722	1.48534	1.55185	1.69065	1.62947	1.5714	1.46619	1.62717	1.31906	1.3549	1.48062	1.44019	1.43701	1.38962	1.43199	1.44835	1.49227	1.82085	1.76476	1.67822	1.88892	1.88337	1.67207	1.46652	1.34435	1.45268	1.43885	1.62399	1.55492	1.38486	1.42227	1.45754	1.75461	1.81479	1.42118	-0.333429	0.00423282	0.0601741	0.550963		0.0726768	0.129842	0.0374126	0.561559		0.11607	0.0769067	0.185143	0.0388913
-0.843467	-0.942919	-0.741246	-0.536649	-0.489628	-0.379542	-0.63825	-0.570317	-0.734575	-0.613421	-0.72366	-0.618118	-0.177003	-0.186393	-0.128644	-0.432531	-0.5202	-0.633608	-0.589852	-0.454328	-0.488861	-0.201806	-0.624259	-0.254388	-0.449794	-0.554255	-0.501349	-0.842544	-0.468607	-0.647714	-0.651733	-0.164013	-0.52878	-0.511014	-0.360151	-0.501799	0.00921432	0.924713	0.150863	0.317403		0.122953	0.0702792	0.48772	0.00382609		0.19483	0.0323438	0.373937	0.0154301
-0.0453074	-0.00155425	-0.0473716	0.212575	0.330678	0.348556	0.816045	0.944511	0.79112	-0.0392525	0.0704522	0.145079	0.307668	0.356976	0.359705	0.89527	0.768229	0.935748	-0.0654147	-0.0400646	-0.0637801	0.321679	0.249073	0.14318	0.405114	0.304239	0.532994	-0.0314111	0.29727	0.850559	0.0587595	0.34145	0.866416	-0.0564198	0.237977	0.414116	0.470536	0.00271186	0.294397	0.00621018		0.807656	0.000600266	0.28269	0.0132741		0.88197	0	0.328681	0.00805699
1.43945	1.50194	1.35841	1.5321	1.60432	1.63178	1.72541	1.68482	1.66686	1.25705	1.20179	1.29744	1.60093	1.37015	1.43792	1.51177	1.57147	1.45678	1.53957	1.39123	1.48663	1.29826	1.30502	1.25574	1.2959	1.33764	1.38871	1.43326	1.5894	1.69236	1.25209	1.46967	1.51334	1.47247	1.28634	1.34075	-0.131726	0.0342925	-0.186136	0.0124957		0.261247	0.00245064	0.217572	0.0426961		0.2591	0.00320497	0.156134	0.0443754
0.760765	0.693727	0.604707	0.735586	0.708307	0.60631	0.896231	0.819289	1.03846	0.317497	0.351108	0.274536	0.44427	0.512982	0.18741	0.658372	0.637453	0.725882	0.54767	0.583659	0.513508	0.971567	0.891613	0.826989	0.904978	0.665284	0.707686	0.6864	0.683401	0.917993	0.31438	0.381554	0.673902	0.548279	0.896723	0.759316	0.211037	0.0286284	0.348444	0.00267385		0.359522	0.000672351	0.0671736	0.609853		0.231594	0.022646	-0.00299843	0.974929
-1.21516	-0.916846	-0.844269	-0.602265	-0.521905	-0.367214	-0.26653	-0.338591	-0.189778	-2.0131	-1.69557	-1.52342	-1.20995	-1.37069	-1.42367	-0.848452	-1.0717	-1.00087	-0.63606	-0.835256	-0.84392	-0.795601	-0.705266	-0.909869	-0.246425	-0.552195	-0.178276	-0.992091	-0.497128	-0.264966	-1.74403	-1.33477	-0.973673	-0.771746	-0.803578	-0.325632	0.446114	0.0178056	-0.0318329	0.821812		0.770358	0.00444548	0.409263	0.0561631		0.727125	0.00279251	0.494962	0.0281428
2.60741	2.50957	2.53211	2.33453	2.47964	2.5101	2.65081	2.64215	2.64053	2.50614	2.49395	2.47364	2.44797	2.56348	2.24013	2.82596	2.74816	2.74446	2.39075	2.35923	2.38245	2.56079	2.61976	2.2954	2.47959	2.32045	2.35477	2.5497	2.44142	2.6445	2.49125	2.41719	2.77286	2.37748	2.49198	2.38494	0.00746004	0.93781	0.114505	0.289314		0.281615	0.000699769	-0.0740516	0.521105		0.0948006	0.0179049	-0.108273	0.151545
-1.8702	-1.91804	-1.70111	-0.538007	-0.836933	-0.789971	0.784868	0.729251	0.60658	-3.05501	-1.97487	-2.65282	-2.20715	-1.72809	-2.11317	-0.41333	-0.486991	-0.281328	-1.2206	-2.19124	-1.21574	-2.61973	-2.19058	-1.81297	0.266755	0.365642	0.304953	-1.82978	-0.721637	0.7069	-2.5609	-2.01614	-0.393883	-1.54253	-2.20776	0.31245	1.85498	0.0048	-0.665232	0.131374		2.16701	0.00176145	0.544761	0.176244		2.53668	0	1.10814	0.00562594
1.98669	2.18286	2.14562	2.0802	2.09633	2.05113	2.09218	2.08551	2.06955	1.80651	1.8722	1.74617	2.10275	1.94831	2.23929	2.12681	2.18832	2.08198	1.79109	1.95871	1.73033	1.89452	1.60724	1.62054	2.03332	1.6426	2.00274	2.10506	2.07589	2.08242	1.80829	2.09678	2.13237	1.82671	1.70744	1.89289	0.0661749	0.763718	-0.119276	0.347468		0.324076	0.00177287	0.28849	0.0368985		-0.0226418	0.827371	-0.0291723	0.743774
0.145614	0.16112	0.158046	-0.454249	-0.638352	-0.69619	-0.400263	-0.371703	-0.317366	-0.262026	-0.318113	-0.483986	-1.27743	-1.3604	-1.41832	-1.0439	-0.981118	-0.989882	-0.0550458	0.0267117	0.00182891	-0.142555	-0.0966072	0.209927	-0.355593	-0.0799501	-0.394263	0.154927	-0.596264	-0.363111	-0.354708	-1.35205	-1.00497	-0.00883508	-0.00974488	-0.276602	-0.267767	0.0326426	-0.000909805	0.996726		-0.650258	0.000762507	-0.997342	0.00409339		-0.518038	0	-0.751191	0.00540056
-2.81617	-2.05133	-1.95158	-1.90397	-2.57651	-2.43762	-1.28095	-1.81881	-1.22795	-1.69724	-1.94752	-1.51699	-1.85226	-1.79667	-1.9933	-1.11024	-1.09711	-1.32842	-2.34352	-1.43735	-2.91942	-1.93861	-2.55473	-1.79189	-1.67304	-2.08416	-1.91242	-2.27303	-2.30603	-1.44257	-1.72058	-1.88074	-1.17859	-2.23343	-2.09508	-1.88987	0.343559	0.489048	0.138352	0.861346		0.541996	0.0095374	-0.160161	0.299178		0.830459	0.0352512	-0.0330029	0.953908
0.0410221	0.0560148	0.0402601	0.128192	0.177213	0.203279	-0.0179403	-0.040334	0.00752711	0.0669115	0.0384207	0.0864637	0.0901563	0.0712559	0.136422	-0.210393	-0.194549	-0.223001	0.37324	0.366372	0.34383	0.460724	0.367305	0.481026	0.00925136	0.0132983	0.0905104	0.0457656	0.169561	-0.0169157	0.0639319	0.0992782	-0.209314	0.361147	0.436352	0.0376867	-0.323461	0.00059312	0.0752044	0.0759928		-0.273246	0.000307692	0.0353463	0.197772		-0.0626814	0.00818799	0.123796	0.0128561
-0.37657	-0.403307	-0.311058	-0.288356	-0.0994053	-0.040978	-0.0887458	-0.428221	-0.383381	-0.309567	-0.479587	-0.313058	-0.30563	-0.66605	-0.556751	-0.295546	-0.056766	-0.140414	-0.378804	-0.65729	-0.684994	-0.626261	-0.571802	-0.834876	-0.700836	-0.652332	-0.628519	-0.363645	-0.142913	-0.300116	-0.367404	-0.509477	-0.164242	-0.573696	-0.677646	-0.660562	-0.0868661	0.403806	-0.10395	0.482081		0.203162	0.0379894	-0.142073	0.292952		0.063529	0.677627	0.220732	0.0565922
-0.896653	-0.197429	-0.321013	-0.899488	-0.680498	-0.197095	-0.138919	0.0856164	-0.285195	0.295976	-0.00817537	0.294451	-0.315266	0.0972683	-0.149913	0.0275664	0.2277	0.227734	0.444379	0.384178	0.617943	0.0331085	0.278799	0.373568	0.411576	0.145362	0.133565	-0.471698	-0.59236	-0.112832	0.194084	-0.122637	0.161	0.482167	0.228492	0.230168	-0.251999	0.0516218	-0.253675	0.078727		-0.0330839	0.891767	-0.316721	0.104449		0.358866	0.129759	-0.120662	0.790416
-0.576961	-0.530554	-0.488207	-0.440653	-0.410145	-0.351562	-0.865717	-0.789755	-0.854985	-0.728868	-0.528885	-0.593991	-0.78474	-0.820534	-0.860213	-1.45365	-1.32564	-1.34169	-0.184057	-0.263088	-0.311907	-0.373697	-0.344832	-0.620825	-0.827358	-0.841016	-0.942988	-0.531907	-0.400787	-0.836819	-0.617248	-0.821829	-1.37366	-0.253018	-0.446452	-0.870454	-0.617437	0.000616523	-0.193434	0.0809275		-0.756415	0.000636078	-0.204581	0.0341755		-0.304911	0.00118695	0.131121	0.0310573
-1.07298	-1.12097	-1.13284	-0.636102	-0.779101	-0.948105	-1.22231	-1.2544	-1.19236	-1.20263	-1.11892	-1.3184	-0.704417	-0.798886	-0.658345	-1.33351	-1.28859	-1.38609	-1.66671	-1.58059	-1.70783	-0.994001	-1.2512	-1.01389	-1.1297	-0.899016	-1.32661	-1.10893	-0.787769	-1.22303	-1.21332	-0.720549	-1.33606	-1.65171	-1.08636	-1.11844	0.533263	0.0105175	0.565345	0.00552903		-0.122745	0.059954	0.492769	0.00593241		-0.114096	0.00723756	0.321162	0.0332756
-0.757836	-0.744655	-0.598095	-0.362445	-0.285619	-1.00067	-0.705326	-0.809183	-0.681353	-0.719134	-0.739081	-0.800181	-0.308239	-0.479257	-0.363736	-1.80403	-0.99339	-1.23088	-0.59057	-1.1035	-0.912477	-0.722616	-1.02298	-1.23222	-1.04725	-0.905334	-0.671066	-0.700195	-0.549579	-0.731954	-0.752799	-0.383744	-1.34277	-0.868847	-0.992606	-0.874551	-0.00570401	0.987219	-0.123758	0.659637		-0.589968	0.0309473	0.369055	0.00714754		-0.0317586	0.74722	0.150616	0.62413
-1.23609	-1.19038	-1.24824	-1.45333	-1.56077	-1.74376	-1.91852	-1.85446	-2.11175	-1.17525	-1.36754	-1.47425	-1.73129	-1.66962	-1.67391	-1.9851	-1.97197	-1.8051	-1.4871	-1.66281	-1.47633	-1.63664	-1.49137	-1.58693	-1.50737	-1.65453	-1.5709	-1.2249	-1.58595	-1.96158	-1.33901	-1.69161	-1.92072	-1.54208	-1.57165	-1.5776	-0.0355194	0.751101	-0.0295676	0.793995		-0.581709	0.00294974	-0.352597	0.0215279		-0.736678	0.00116289	-0.361051	0.0226694
0.782964	0.663324	0.642874	1.04175	1.06671	1.08575	1.1513	1.19559	1.23012	0.290431	0.394311	0.351155	0.69557	0.634476	0.818837	0.852695	0.820883	0.82204	1.20859	1.27228	1.34077	1.59586	1.52111	1.57206	1.52934	1.55153	1.55313	0.696387	1.06474	1.19233	0.345299	0.716294	0.831873	1.27388	1.56301	1.54467	0.270786	0.00266667	0.289128	0.00432861		0.486573	0.000251429	0.370995	0.00834392		0.495947	0.000794371	0.36835	0.0062208
3.43341	3.3763	3.40141	3.30447	3.32296	3.27735	2.86296	2.84755	2.90693	3.5618	3.45109	3.43382	3.16856	3.20748	3.28472	2.57605	2.61139	2.43899	3.57909	3.5818	3.47914	3.54838	3.25953	3.49173	3.17721	3.34736	3.39365	3.40371	3.30159	2.87248	3.48224	3.22025	2.54214	3.54668	3.43322	3.30607	-0.240606	0.0188337	-0.113461	0.264786		-0.940094	0.00022449	-0.261987	0.0136525		-0.531226	0	-0.102115	0.0168767
-0.913661	-1.07389	-0.99355	-1.03258	-0.932262	-0.778618	-1.20186	-1.1299	-1.06955	-1.00681	-0.945322	-0.916285	-0.742765	-0.770695	-0.807712	-0.901914	-0.982252	-1.03143	0.0957558	0.0847881	0.0598099	-0.125201	0.0776553	-0.102072	-0.156769	-0.145402	-0.191472	-0.993699	-0.914486	-1.13377	-0.956139	-0.773724	-0.971865	0.0801179	-0.0498725	-0.164548	-0.244666	0.000874126	-0.12999	0.0847133		-0.0157266	0.859652	0.182415	0.00977345		-0.14007	0.043003	0.0792132	0.445881
-0.718289	-0.830306	-0.735138	-0.875969	-0.811086	-0.805272	-1.20045	-0.992949	-1.05296	-1.33705	-1.28896	-1.22394	-1.19172	-1.21183	-1.36071	-1.31452	-1.26283	-1.37486	-0.968913	-0.975399	-1.0019	-1.44501	-1.2973	-1.42896	-1.45945	-1.61883	-1.28277	-0.761244	-0.830776	-1.08212	-1.28332	-1.25476	-1.3174	-0.98207	-1.39042	-1.45368	-0.471612	0.00722705	-0.408355	0.00218099		-0.0340875	0.49197	0.0285598	0.755481		-0.320876	0.00691751	-0.0695312	0.16739
0.737158	0.63447	0.562685	0.323942	0.341061	0.361319	0.424367	0.408295	0.409645	-0.403343	-0.223765	-0.273665	-0.382689	-0.495061	-0.466257	-0.408816	-0.322278	-0.448939	0.00137162	-0.0517757	-0.0617421	-0.136781	0.0711808	-0.157147	-0.104067	-0.0766218	0.126119	0.644771	0.342107	0.414102	-0.300258	-0.448002	-0.393344	-0.037382	-0.0742492	-0.0181899	0.0191921	0.889809	-0.0368671	0.734724		-0.0930866	0.122329	-0.147745	0.0747463		-0.230668	0.0069219	-0.302664	0.0119861
0.728966	0.732136	0.856902	0.895332	0.86337	1.0128	0.711918	0.706053	0.660003	0.503792	0.520168	0.584432	0.570233	0.785956	0.439587	0.477036	0.505627	0.627977	0.911791	0.551924	0.657805	0.580662	0.536644	0.453521	0.498583	0.306862	0.434422	0.772668	0.923835	0.692658	0.536131	0.598592	0.53688	0.707173	0.523609	0.413289	-0.293885	0.0398524	-0.183565	0.139402		0.000749429	0.995288	0.0624615	0.654121		-0.0800098	0.0869435	0.151167	0.0743924
-2.59161	-2.44636	-2.56464	-2.42269	-2.27797	-2.75602	-1.85806	-1.8027	-1.54774	-2.72003	-2.41771	-2.36097	-2.53387	-2.39746	-2.78956	-1.18525	-1.24107	-1.24159	-2.73447	-2.4488	-2.48944	-3.00607	-2.62409	-2.65354	-1.45707	-2.15306	-1.88681	-2.5342	-2.48556	-1.73617	-2.49957	-2.57363	-1.22264	-2.55757	-2.76123	-1.83231	0.725256	0.0185479	-0.203662	0.212377		1.27693	0.000538302	-0.0740631	0.751466		0.798038	0.00184308	0.0486435	0.831995
-0.0423687	-0.253297	-0.308899	-1.07307	-1.08895	-0.923442	-0.657412	-0.6787	-0.738671	-0.168543	-0.238944	-0.246201	-0.903494	-0.986257	-1.01313	-0.276312	-0.320172	-0.243296	-1.41265	-1.59824	-1.36626	-1.21686	-0.979795	-1.05652	-0.694879	-0.676847	-0.609683	-0.201521	-1.02849	-0.691594	-0.217896	-0.967626	-0.279926	-1.45905	-1.08439	-0.66047	0.798581	0.000955401	0.374657	0.0146159		-0.0620306	0.0638108	-0.749731	0.0026383		-0.490073	0.00313928	-0.826968	0.00545455
-0.783126	-0.777835	-0.759826	-0.517299	-0.542055	-0.545877	-0.220701	-0.271557	-0.194744	-0.688573	-0.840115	-0.807006	-0.457275	-0.551476	-0.542186	-0.00477839	-0.0972862	-0.0977793	-0.660025	-0.701845	-0.664981	-0.0807064	-0.0704684	-0.0475497	0.109091	0.0691445	-0.0380263	-0.773596	-0.535077	-0.229001	-0.778564	-0.516979	-0.0666146	-0.675617	-0.0662415	0.0467364	0.722353	0.000579439	0.609375	0		0.71195	0.000297578	0.261586	0.0143		0.544595	0	0.238519	0.00408696
-0.826836	-0.799956	-0.87014	-0.982391	-1.17293	-0.967495	-0.900858	-0.838576	-0.853263	-0.395489	-0.326913	-0.344297	-0.710728	-0.677554	-0.78417	-0.655536	-0.687095	-0.950988	-0.560803	-0.831691	-0.823475	-1.49335	-1.784	-1.65867	-1.00164	-1.06707	-0.657441	-0.832311	-1.04094	-0.864232	-0.355567	-0.724151	-0.76454	-0.738656	-1.64534	-0.908719	-0.170063	0.261143	-0.906686	0.0029352		-0.408973	0.00635244	-0.368584	0.00448703		-0.0319215	0.225203	-0.208627	0.0456669
1.5677	1.66252	1.65804	1.75524	1.87134	1.8976	1.60191	1.5409	1.58706	1.43418	1.43999	1.62508	1.67158	1.62859	1.54324	1.53966	1.45212	1.54914	1.89473	1.86874	1.84709	1.95562	1.96108	1.75554	1.40334	1.3279	1.41672	1.62942	1.84139	1.57662	1.49975	1.61447	1.51364	1.87019	1.89075	1.38265	-0.487535	0.000580796	0.0205582	0.852921		0.0138857	0.92389	0.11472	0.176125		-0.052798	0.13387	0.211972	0.0248916
0.234101	0.318364	0.105979	0.0634656	0.100678	0.0879526	0.181854	0.19359	0.166013	0.439779	0.553075	0.313996	0.193214	-0.00160575	0.240524	0.332453	0.406479	0.348215	0.533883	0.524031	0.543289	0.538366	0.577782	0.55539	0.380922	0.294393	0.269798	0.219481	0.0840322	0.180486	0.435617	0.144044	0.362382	0.533734	0.557179	0.315038	-0.218697	0.00325505	0.023445	0.103489		-0.0732344	0.262144	-0.291573	0.0452171		-0.0389956	0.629407	-0.135449	0.0969459
0.363571	0.432541	0.48229	0.41349	0.159261	0.322089	0.880625	0.955744	1.12588	0.366022	0.297611	0.256003	0.290726	0.207048	0.272362	1.26234	1.14926	1.20381	0.154487	0.297078	0.27126	-0.0707104	0.204901	0.065609	0.970287	0.892809	0.789378	0.426134	0.29828	0.987418	0.306545	0.256712	1.20514	0.240942	0.0665999	0.884158	0.643216	0.00100165	-0.174342	0.0943513		0.898595	0.000419847	-0.0498334	0.279162		0.561284	0.00205874	-0.127854	0.191084
1.03689	0.792193	0.821282	0.775298	0.742797	0.765289	1.39927	1.16037	1.06494	-0.695678	1.2348	0.322526	-0.260683	-0.0766437	-0.776161	0.0786619	0.046289	-0.0735741	-0.573272	-0.729296	-0.552951	0.174624	-0.353999	-0.0066309	0.00842309	-0.016052	0.0605755	0.883456	0.761128	1.20819	0.287214	-0.371162	0.0171256	-0.618506	-0.0620019	0.0176489	0.636155	0.000954455	0.556504	0.020625		-0.270089	0.766346	-0.658377	0.323494		0.324736	0.0326202	-0.122329	0.188304
-1.78285	-1.53788	-1.48491	-1.53889	-1.499	-1.87662	-1.21836	-1.57028	-1.20396	-1.78649	-1.76373	-2.06146	-1.75877	-1.91821	-1.96742	-1.06048	-1.14249	-1.11055	-1.57015	-1.73919	-1.80131	-1.25571	-1.30666	-1.37068	-1.22059	-1.27578	-1.46115	-1.60188	-1.63817	-1.33086	-1.87056	-1.88147	-1.10451	-1.70355	-1.31102	-1.31917	0.384379	0.0125543	0.392533	0.00710742		0.76605	0.00126471	-0.0109082	0.956388		0.271014	0.083832	-0.0362939	0.882203
-1.0969	-1.21568	-1.34686	-1.37115	-1.37644	-1.40294	-1.67006	-2.40908	-2.06535	-1.01519	-0.943152	-0.896713	-1.32709	-1.32704	-1.41463	-2.26121	-1.99603	-2.30013	-1.21589	-1.22965	-1.41947	-1.92677	-1.70309	-1.76553	-2.35455	-2.46381	-2.20941	-1.21981	-1.38351	-2.04816	-0.951685	-1.35625	-2.18579	-1.28834	-1.79846	-2.34259	-1.05425	0.000972755	-0.510124	0.00654237		-1.23411	0.000269171	-0.404566	0.00453156		-0.828351	0.0124838	-0.163697	0.0890636
1.41935	1.43707	1.41918	0.88822	0.798845	1.49509	-1.84119	-1.49736	0.0308731	0.800667	0.755308	0.792682	0.515143	0.671142	0.428895	0.176505	0.285049	0.0425797	0.508061	0.683605	1.11486	-3.97947	-4.03505	-3.62176	-4.22716	-3.79536	-0.343924	1.4252	1.06072	-1.10256	0.782886	0.538393	0.168045	0.768843	-3.87876	-2.78882	-3.55766	0.0257499	-4.6476	0		-0.614841	0.000962536	-0.244492	0.0311728		-2.52776	0.00750248	-0.364485	0.168783
-3.1208	-0.798982	-0.352666	-1.09545	0.0130825	-0.385529	0.0329416	0.0344841	0.0919015	-0.419523	-0.565319	-0.205409	-0.20802	0.178235	-0.0558932	0.234529	0.281136	0.525028	-0.0858538	-0.227795	-0.247758	0.0455859	-0.0191779	-0.216808	0.383271	0.310317	0.397539	-1.42415	-0.4893	0.0531091	-0.396751	-0.0285594	0.346898	-0.187136	-0.0634666	0.363709	0.550845	0.000908939	0.123669	0.220778		0.743648	0.00348893	0.368191	0.0699946		1.47726	0.0933321	0.934848	0.385632
1.36559	1.28489	1.31476	1.89299	1.63528	1.83179	1.63929	1.5828	1.90143	0.325734	0.842004	0.27485	1.04366	0.965932	0.119092	0.981954	1.12839	1.0773	1.01857	1.08687	0.584775	1.23615	1.18535	1.06314	1.26613	1.09659	1.28317	1.32175	1.78669	1.70784	0.480863	0.70956	1.06255	0.896738	1.16155	1.2153	0.318558	0.0757719	0.264811	0.143159		0.581685	0.0152986	0.228697	0.611487		0.386092	0.0112011	0.46494	0.0119236
1.27597	0.964832	1.21419	1.21755	0.32591	0.595563	0.877919	1.02453	1.11427	0.736825	0.894819	0.466681	-1.48613	0.591537	-0.200192	-2.23955	-1.55192	-1.5443	0.259485	0.554152	0.289154	-0.0578129	-0.33952	-0.183851	0.170928	0.409598	0.129411	1.15167	0.713007	1.00557	0.699442	-0.364928	-1.77859	0.367597	-0.193728	0.236646	-0.130951	0.298441	-0.561325	0.00955071		-2.47803	0.000716578	-1.06437	0.145026		-0.146091	0.191465	-0.438658	0.190472
-0.504003	-0.544857	-0.454705	-0.239597	-0.365916	-0.473716	-0.423352	-0.507091	-0.538571	-0.391504	-0.609282	-0.637815	-0.526274	-0.426175	-0.641599	-0.378002	-0.22804	-0.468087	-0.591875	-0.804679	-0.782806	-1.05987	-1.10172	-1.0135	-1.06108	-0.86557	-1.0022	-0.501188	-0.359743	-0.489671	-0.5462	-0.53135	-0.358043	-0.726453	-1.05836	-0.976285	-0.249832	0.0274	-0.331908	0.0087089		0.188157	0.0701961	0.0148504	0.931456		0.011517	0.885312	0.141445	0.120163
-0.568302	-0.488179	-0.494671	-0.365898	-0.431291	-0.387852	-0.399061	-0.441204	-0.40773	-0.656529	-0.5481	-0.676525	-0.544549	-0.624451	-0.566869	-0.483055	-0.448427	-0.567127	-0.562359	-0.440513	-0.421222	-0.451763	-0.378362	-0.697314	-0.531992	-0.620136	-0.534685	-0.517051	-0.395014	-0.415998	-0.627052	-0.578623	-0.499536	-0.474698	-0.509146	-0.562271	-0.087573	0.104553	-0.0344485	0.838298		0.127515	0.0326745	0.0484283	0.35566		0.101052	0.0136671	0.122037	0.0273231
0.396218	0.286476	0.277166	0.462274	-0.00782347	0.214977	0.277109	-1.07134	-0.0131319	0.358732	0.619985	-0.376763	-0.179653	-0.482086	-0.0827835	0.0664554	-0.829828	-0.043932	-0.0311811	-0.00556207	-0.059058	-0.0765593	-0.0452137	-0.256911	-0.0971444	0.241235	0.173874	0.319953	0.223142	-0.269122	0.200652	-0.248174	-0.269102	-0.0319337	-0.126228	0.105988	0.137922	0.175994	-0.0942944	0.196144		-0.469753	0.20149	-0.448826	0.221622		-0.589075	0.141792	-0.0968109	0.59662
4.87216	4.91725	4.87681	4.93944	4.98967	4.97102	4.74508	4.74084	4.84385	4.98502	4.94538	5.13091	5.02417	5.08292	4.90991	4.97143	4.83281	4.96617	5.04972	5.11019	5.10508	4.97065	5.09048	4.82221	4.7584	4.67396	4.69848	4.88874	4.96671	4.77659	5.02044	5.00567	4.92347	5.08833	4.96111	4.71028	-0.378053	0.000628141	-0.12722	0.145257		-0.0969656	0.142291	-0.0147703	0.9098		-0.112151	0.0198809	0.0779742	0.0273724
-1.27473	-1.39633	-1.26291	-1.42367	-1.42431	-1.37215	-1.09281	-1.01423	-1.23465	-1.30971	-1.30656	-1.08807	-1.1039	-1.09484	-1.2564	-0.835821	-0.885321	-0.75405	-1.09601	-1.10434	-0.988241	-1.56422	-1.32163	-1.52955	-1.13142	-1.3393	-1.18978	-1.31132	-1.40671	-1.1139	-1.23478	-1.15172	-0.825064	-1.06287	-1.4718	-1.22017	-0.157301	0.0532051	-0.408936	0.00768044		0.409716	0.00447142	0.0830632	0.422741		0.197429	0.0337358	-0.0953829	0.106264
2.19913	2.17201	2.29865	2.13684	2.14171	2.0747	1.81289	1.69596	1.79397	2.35102	2.3021	2.47709	2.26907	2.16096	2.14362	1.76885	1.80536	1.79703	2.38425	2.58659	2.49809	2.22274	2.18979	2.15585	1.98448	1.89458	1.89826	2.22327	2.11775	1.76761	2.37674	2.19122	1.79041	2.48964	2.18946	1.92578	-0.563864	0.00176012	-0.30018	0.00768022		-0.586325	0.000601864	-0.185521	0.0462025		-0.45566	0.00122716	-0.105513	0.0778583
-0.795161	-1.06578	-1.08508	-0.437984	-0.694048	-0.72004	-0.578276	-0.482949	-0.566744	-0.625656	-0.696288	-0.761152	-1.0238	-0.59832	-0.63633	-0.353923	-0.135973	-0.177923	-1.311	-1.24914	-1.37008	-1.44774	-1.12535	-0.915168	-0.646768	-0.572058	-0.466625	-0.982008	-0.617357	-0.542656	-0.694365	-0.752815	-0.222606	-1.31007	-1.16275	-0.561817	0.748255	0.00062422	0.147321	0.409956		0.471759	0.0024625	-0.0584498	0.785094		0.439352	0.00715353	0.364651	0.0546872
-1.42914	-1.89329	-1.74765	-2.09646	-1.7822	-1.97368	-1.56588	-1.36662	-1.50808	-1.62099	-1.83433	-1.53142	-1.64705	-1.41487	-2.10305	-1.26933	-1.59302	-1.47311	-2.04192	-1.68571	-1.69579	-1.97184	-1.93795	-1.73526	-1.427	-2.13721	-1.42001	-1.69003	-1.95078	-1.4802	-1.66225	-1.72166	-1.44515	-1.80781	-1.88169	-1.66141	0.146401	0.694242	-0.0738781	0.701444		0.217094	0.0838652	-0.0594119	0.867494		0.209834	0.147598	-0.260753	0.186661
-1.65655	-1.67273	-1.95348	-1.47383	-1.62781	-1.59629	-1.02433	-0.933894	-0.948748	-1.49217	-1.67388	-1.8423	-1.55473	-1.83703	-1.76261	-1.22674	-1.23825	-1.45498	-1.78286	-1.39619	-1.63569	-1.93479	-2.04809	-1.79295	-1.76586	-1.71296	-1.25698	-1.76092	-1.56598	-0.968992	-1.66945	-1.71813	-1.30666	-1.60491	-1.92528	-1.5786	0.0263153	0.945316	-0.320363	0.0528742		0.362793	0.0195642	-0.0486772	0.811972		0.791924	0.00152413	0.194941	0.140761
0.569792	0.525087	0.392266	0.68449	0.887712	1.01808	1.01965	1.00977	0.771629	0.511783	0.844239	0.905738	0.652712	0.974335	0.966347	1.32332	1.38298	1.20407	0.771594	0.376872	0.67725	0.586678	-0.0480351	0.0243344	0.411647	0.622166	0.845713	0.495715	0.863427	0.933683	0.75392	0.864465	1.30346	0.608572	0.187659	0.626509	0.0179365	0.958668	-0.420913	0.107964		0.549535	0.00705208	0.110545	0.592689		0.437968	0.00696521	0.367712	0.0371762
0.0714834	0.196274	0.11958	0.195628	0.190652	0.109503	-0.116752	-0.142079	-0.177989	-0.199348	-0.0885415	0.0491736	-0.0289223	-0.235382	0.0118253	-0.342507	-0.398617	-0.462566	0.685971	0.699955	0.616662	0.597053	0.478185	0.498703	0.287016	0.565724	0.365648	0.129112	0.165261	-0.145607	-0.0795719	-0.0841596	-0.40123	0.66753	0.524647	0.406129	-0.2614	0.0227973	-0.142883	0.0240035		-0.321658	0.00756091	-0.00458773	0.979401		-0.274719	0.00213445	0.0361488	0.524736
-1.09755	-0.990601	-1.27628	-1.07111	-0.996297	-1.17951	-0.890404	-1.24475	-0.946214	-0.76444	-1.1704	-0.681231	-1.00802	-0.919952	-0.98301	-0.777493	-0.901777	-0.869913	-0.729829	-0.754466	-0.781493	-1.54954	-1.3477	-1.63416	-1.151	-0.917821	-1.0535	-1.12148	-1.08231	-1.02712	-0.872022	-0.970326	-0.849728	-0.755263	-1.51047	-1.04077	-0.28551	0.0105497	-0.755203	0.00206796		0.0222945	0.945701	-0.098304	0.623776		0.0943527	0.568642	0.0391699	0.793801
1.51731	1.54955	1.44983	1.62925	1.57809	1.72173	1.45901	1.70774	1.52962	1.43943	1.47632	1.56299	1.704	1.78443	1.78866	1.64649	1.68451	1.68014	1.80543	1.68263	1.61787	1.27622	1.39694	1.3262	1.38439	1.36009	1.55189	1.50557	1.64302	1.56546	1.49291	1.75903	1.67038	1.70198	1.33312	1.43212	-0.269853	0.0183136	-0.368855	0.00606169		0.177468	0.00531808	0.266121	0.00913191		0.0598895	0.496066	0.137456	0.0608611
-1.3649	-2.56437	-1.81767	-2.6213	-2.43915	-2.3596	-1.69693	-1.54133	-1.2779	-2.48997	-1.95721	-1.93808	-3.59502	-3.05364	-2.95976	-2.02467	-2.16125	-1.94465	-1.46134	-1.68644	-1.20669	-1.71766	-1.38393	-1.42067	-2.31963	-2.12561	-2.53134	-1.91565	-2.47335	-1.50539	-2.12842	-3.20281	-2.04352	-1.45149	-1.50742	-2.32553	-0.874032	0.00721421	-0.0559273	0.839795		0.0848975	0.797528	-1.07438	0.0206519		0.410261	0.242742	-0.557701	0.191782
1.20564	1.07993	1.06081	0.945812	1.19946	1.43336	1.11792	1.22148	1.19207	1.24361	1.14251	1.44295	1.54582	1.15916	1.51082	1.07957	1.27706	1.42578	0.971915	1.16178	0.806133	0.85099	0.482567	0.380478	0.929725	0.723733	0.910806	1.11546	1.19288	1.17716	1.27636	1.40527	1.26081	0.979944	0.571345	0.854755	-0.125189	0.296441	-0.408599	0.0567294		-0.0155508	0.956462	0.128912	0.470069		0.0616935	0.235912	0.0774151	0.709574
2.14887	2.15748	2.13941	2.11208	2.17936	2.16546	1.87367	1.84982	1.91944	2.15313	2.27375	2.3055	2.17557	2.17166	2.07362	1.94838	1.94855	1.91722	2.21667	2.17504	2.13445	1.8465	2.03705	1.79596	1.83864	1.79307	1.85899	2.14859	2.1523	1.88098	2.24412	2.14028	1.93805	2.17539	1.89317	1.83023	-0.345154	0.000697987	-0.282212	0.0155677		-0.306075	0.00217341	-0.103842	0.13018		-0.267613	0.000391705	0.00371067	0.915652
-0.0621831	0.0158865	-0.0309536	0.174066	0.169205	0.284396	-0.164637	-0.0886147	-0.276025	0.546645	0.714942	0.52994	0.521171	0.451439	0.56472	-0.133265	0.0436754	0.0679545	0.134691	0.251518	0.222656	0.268757	0.344434	0.346915	-0.157059	-0.10453	-0.00261927	-0.0257501	0.209222	-0.176425	0.597176	0.512443	-0.00721153	0.202955	0.320035	-0.0880694	-0.291024	0.00637907	0.11708	0.038887		-0.604387	0.00148044	-0.0847325	0.266009		-0.150675	0.0336361	0.234972	0.0132194
-1.14873	-0.92782	-0.910819	-0.340753	-0.326008	-0.307077	0.0273931	-0.153589	-0.0313218	-1.20948	-1.41536	-1.22316	-0.315019	-0.611259	-0.401759	-0.385242	-0.480214	-0.489954	-2.16011	-2.5149	-2.33987	-1.0371	-1.00303	-0.970216	-0.653133	-0.847652	-0.860839	-0.995791	-0.324612	-0.0525059	-1.28266	-0.442679	-0.451803	-2.33829	-1.00345	-0.787208	1.55109	0.000707214	1.33484	0.000255556		0.830862	0.000613297	0.839986	0.00463007		0.943285	0.000796863	0.671179	0.00501313
1.88557	1.86144	1.98722	2.00224	2.05839	2.1639	1.67039	1.84572	1.77687	1.77618	1.7738	1.80746	1.96551	1.95296	2.02055	1.96354	1.85572	1.71744	2.04212	2.00345	2.01109	1.78307	1.98001	2.04606	1.73216	1.56626	1.69396	1.91141	2.07484	1.76433	1.78581	1.97968	1.84557	2.01889	1.93638	1.66413	-0.354759	0.0027658	-0.0825054	0.345525		0.059758	0.395233	0.193866	0.00469177		-0.147079	0.0449653	0.163434	0.0610337
1.32009	1.29429	1.28399	1.46548	1.52509	1.52811	1.33805	1.38275	1.38174	1.22521	1.40502	1.41066	1.4981	1.44342	1.39518	1.30416	1.3128	1.31701	1.72247	1.57938	1.57423	1.46507	1.47596	1.48187	1.18298	1.19984	1.30096	1.29946	1.50623	1.36752	1.34696	1.44557	1.31133	1.62536	1.4743	1.22793	-0.397435	0.0031338	-0.151056	0.0258025		-0.0356342	0.676348	0.0986057	0.204918		0.0680574	0.0118779	0.20677	0.00498387
-0.39242	-0.694809	-0.758837	-0.793419	-0.683526	-0.873672	-0.322813	-1.36653	-2.17023	-1.41482	-1.18134	-1.39767	-1.62121	-1.30724	-1.7168	-1.61719	-1.75338	-1.72733	-2.33394	-1.44961	-1.76616	-1.58996	-1.69488	-1.5688	-1.61989	-2.31722	-0.959789	-0.615355	-0.783539	-1.28653	-1.33128	-1.54842	-1.6993	-1.8499	-1.61788	-1.6323	0.217607	0.763819	0.232024	0.437475		-0.368022	0.00631691	-0.217136	0.192684		-0.67117	0.1958	-0.168184	0.252138
0.462842	0.419185	0.458842	0.742211	0.402192	0.139862	0.340488	0.189656	0.306161	0.731865	0.772316	0.576925	0.60057	0.42872	0.440063	0.120018	0.0846381	0.0376506	0.443264	0.384084	0.327509	0.00861287	-0.0391431	-0.000676632	0.16257	0.671649	0.349231	0.446956	0.428089	0.278768	0.693702	0.489785	0.0807689	0.384952	-0.0104023	0.394483	0.0095311	0.975533	-0.395355	0.00148527		-0.612933	0.00072747	-0.203918	0.0627088		-0.168188	0.013634	-0.0188677	0.948493
1.47109	1.1916	1.59673	1.57413	1.13069	1.40967	1.46485	1.45699	1.60191	1.45238	1.65264	1.16687	1.6441	1.53514	1.64909	1.22183	1.17707	1.18993	1.72059	1.6885	1.59712	2.00231	1.5996	1.53614	1.63935	1.88024	1.86202	1.41981	1.3715	1.50791	1.42396	1.60945	1.19628	1.66874	1.71268	1.79387	0.125131	0.141515	0.0439477	0.856104		-0.227683	0.0915667	0.185483	0.259022		0.0881062	0.567142	-0.0483116	0.86548
-2.02114	-2.42168	-1.85043	-2.65269	-2.36213	-2.54673	-2.41449	-2.70211	-2.54971	-3.0303	-2.36866	-2.88998	-2.24156	-2.52717	-2.11073	-2.75313	-2.0696	-2.69371	-2.98328	-3.1099	-4.64619	-3.33184	-3.34015	-5.11796	-2.70155	-4.42669	-4.67351	-2.09775	-2.52052	-2.55544	-2.76298	-2.29315	-2.50548	-3.57979	-3.92998	-3.93391	-0.354125	0.784742	-0.350195	0.7682		0.2575	0.361576	0.469826	0.107398		-0.457687	0.0387956	-0.422767	0.0904378
-0.276071	-0.430138	-0.490468	-0.797717	-0.966668	-0.841157	-0.579881	-0.897326	-1.08585	-0.165745	-0.251785	-0.35676	-0.750446	-0.87839	-0.453856	-0.198962	-0.455577	-0.376678	-0.489363	-0.645638	-0.734693	-0.29245	-0.293384	-0.172646	-0.44476	-0.57373	-0.321666	-0.398892	-0.868514	-0.854351	-0.258097	-0.69423	-0.343739	-0.623231	-0.252827	-0.446719	0.176513	0.0955328	0.370405	0.00961304		-0.0856423	0.323387	-0.436133	0.0364388		-0.455459	0.0249358	-0.469622	0.0119159
1.1489	1.24581	1.16892	1.44882	1.51282	1.53953	1.56753	1.75812	1.72384	1.07791	1.2007	1.22914	1.49088	1.41261	1.49587	1.81587	1.75257	1.82806	1.35142	1.38371	1.44037	1.35734	1.47245	1.35538	1.61183	1.51181	1.59489	1.18787	1.50039	1.68317	1.16925	1.46645	1.79883	1.39183	1.39505	1.57284	0.181007	0.00852313	0.00322008	0.97087		0.629586	0.000267288	0.297206	0.0106538		0.495291	0.00188999	0.312513	0.00641431
2.42635	2.33955	2.34098	1.89476	1.65686	1.71171	1.68205	1.74512	1.73227	2.46694	2.4463	2.29496	1.87574	1.8406	1.92067	1.66285	1.60344	1.54815	2.10971	2.03216	2.16023	1.66415	1.62777	1.67692	1.7048	1.93408	1.82796	2.36896	1.75444	1.71981	2.40273	1.879	1.60481	2.1007	1.65628	1.82228	-0.278421	0.013807	-0.444421	0.0010924		-0.797918	0.000286906	-0.523728	0.00480261		-0.649147	0	-0.614517	0.00634294
0.594891	0.564628	0.723557	0.453661	0.11341	0.617118	0.60078	0.468884	0.689167	0.297727	-0.354746	0.240996	-0.0116765	0.500182	0.380006	0.613539	0.594481	0.364178	0.820789	0.817209	0.910335	0.226153	0.336889	0.671351	1.0835	1.26969	1.00489	0.627692	0.39473	0.586277	0.0613257	0.289504	0.524066	0.849444	0.411464	1.11936	0.269916	0.0195608	-0.43798	0.0240248		0.46274	0.0481086	0.228178	0.450582		-0.0414152	0.728605	-0.232962	0.20851
0.208163	0.485177	0.532349	0.463846	0.24479	0.245339	-0.173829	-0.158164	0.124724	0.227985	0.358552	0.0695641	0.40363	0.26602	0.407195	-0.418056	-0.48324	-0.204539	0.852997	0.775852	0.849629	0.631897	0.627944	0.893709	0.601774	0.301926	0.480798	0.408563	0.317992	-0.0690895	0.2187	0.358948	-0.368611	0.82616	0.71785	0.461499	-0.36466	0.0110557	-0.10831	0.271288		-0.587312	0.00447275	0.140248	0.201625		-0.477652	0.0150243	-0.0905712	0.567995
-0.363652	-0.644889	-0.583494	-0.499181	-0.412376	-0.563228	-0.315017	-0.158289	-0.295976	-0.796961	-0.702794	-0.897784	-0.458377	-0.683502	-0.777404	-0.51615	-0.43239	-0.473352	-0.922633	-0.920926	-0.821691	-0.536023	-0.493151	-0.197023	-0.441252	-0.508313	-0.736317	-0.530679	-0.491595	-0.256427	-0.799179	-0.639761	-0.473964	-0.888417	-0.408732	-0.561961	0.326456	0.016487	0.479685	0.0107141		0.325215	0.00361649	0.159419	0.2068		0.274251	0.0266219	0.0390836	0.787737
0.23784	0.420551	0.331242	0.563991	0.521247	0.522927	0.329994	0.290369	0.387625	0.264171	0.361938	0.179995	0.333428	0.214351	0.208175	0.0100489	0.0722895	0.0995216	0.491941	0.466822	0.388574	0.233522	0.176903	0.194692	0.448027	0.493873	0.538891	0.329878	0.536055	0.335996	0.268701	0.251985	0.06062	0.449112	0.201706	0.493597	0.0444845	0.263145	-0.247406	0.00333703		-0.208081	0.0108831	-0.0167166	0.877495		0.00611846	0.956425	0.206177	0.0274488
0.732956	0.714287	0.545339	0.741668	0.699655	0.602125	1.39236	1.50652	1.37911	0.369672	0.39593	0.267693	0.197407	0.398776	0.19899	1.14877	1.08311	1.24123	1.10755	1.14578	1.16771	1.11084	0.833723	0.910381	1.55146	1.5137	1.41951	0.664194	0.681149	1.42599	0.344432	0.265057	1.1577	1.14035	0.951649	1.49489	0.354546	0.00165265	-0.188697	0.0632516		0.813269	0.000320596	-0.0793742	0.365514		0.761801	0.000645378	0.0169553	0.885709
-0.736167	-0.969224	-0.713221	-0.922809	-1.05676	-0.912499	-0.740857	-0.952408	-0.909123	-1.49868	-1.01874	-0.895367	-0.958544	-0.896107	-0.923741	-1.29313	-1.34146	-0.90731	-0.731231	-0.68832	-0.598938	-1.07876	-0.854225	-0.811211	-0.248823	-0.319612	-0.305731	-0.806204	-0.964023	-0.867463	-1.1376	-0.926131	-1.18063	-0.67283	-0.914733	-0.291389	0.381441	0.00173752	-0.241903	0.0407015		-0.0430352	0.929335	0.211467	0.306374		-0.0612586	0.668274	-0.157819	0.166083
0.747605	0.908973	0.682918	0.738517	0.542543	0.40284	0.386867	0.706037	0.75083	0.621947	0.739769	0.674884	0.385186	0.568475	0.691779	0.689428	0.7368	0.670522	0.746041	0.740183	0.729418	0.393265	0.343821	0.477154	0.629007	0.491374	0.527005	0.779832	0.5613	0.614578	0.678866	0.54848	0.698917	0.738547	0.404747	0.549129	-0.189418	0.00807552	-0.3338	0.00217104		0.0200505	0.745563	-0.130386	0.2302		-0.165254	0.191453	-0.218532	0.136193
-1.31301	-1.14473	-1.28357	-1.04594	-1.13093	-1.24504	-0.911665	-0.680629	-0.865858	-0.975351	-1.04645	-0.976618	-0.910756	-0.883578	-0.786358	-0.64255	-0.610032	-0.638382	-0.767091	-0.552527	-0.665848	-0.994263	-1.1552	-0.761912	-0.280136	-0.429066	-0.226434	-1.2471	-1.14064	-0.819384	-0.999475	-0.860231	-0.630321	-0.661822	-0.97046	-0.311879	0.349943	0.0110292	-0.308637	0.0531023		0.369153	0.000227743	0.139244	0.0371131		0.427719	0.00538135	0.106467	0.241764
0.366379	0.300423	0.416527	0.870136	0.779981	0.715279	0.664971	0.707498	0.694659	0.364657	0.331172	0.332328	0.689056	0.802378	0.749618	0.693625	0.551556	0.718442	0.492328	0.517858	0.602463	1.31503	1.28911	1.31514	1.08107	0.863724	0.711154	0.36111	0.788465	0.689043	0.342719	0.747018	0.654541	0.53755	1.30643	0.885315	0.347765	0.0212036	0.768878	0		0.311822	0.00254399	0.404299	0.00380368		0.327933	0.00113557	0.427356	0.00654494
-1.03575	-0.962691	-0.878321	-1.40709	-1.14039	-1.15578	-0.914951	-1.35828	-1.35353	-0.788426	-1.05706	-0.885927	-1.14938	-1.27496	-1.11345	-0.915195	-0.875698	-1.05255	-2.13132	-1.69523	-1.60636	-1.01804	-1.14114	-0.953233	-1.00001	-1.08915	-0.943753	-0.95892	-1.23442	-1.20892	-0.910472	-1.17926	-0.947814	-1.81097	-1.03747	-1.01097	0.799999	0.00735261	0.773501	0.00954671		-0.0373421	0.829928	-0.268793	0.0440605		-0.25	0.106263	-0.275499	0.0539756
-1.57428	-1.66661	-1.16981	-1.12373	-0.935622	-1.15621	-1.10665	-0.974371	-1.37416	-1.65237	-1.4576	-1.58722	-1.24722	-1.21566	-1.23908	-0.996852	-0.904467	-1.27843	-1.18373	-1.31071	-1.45638	-1.42884	-0.949657	-1.06471	-0.809953	-0.926259	-0.843706	-1.47023	-1.07185	-1.15173	-1.56573	-1.23399	-1.05992	-1.31694	-1.14773	-0.859973	0.456969	0.0051883	0.169207	0.347956		0.505812	0.00773402	0.331741	0.00912276		0.318506	0.102391	0.398379	0.0787619
0.0455496	-0.843193	0.0757763	0.323337	0.393768	0.327327	0.132468	0.142513	0.197769	0.118617	0.190154	0.0419791	0.287255	0.324855	0.424268	0.286853	0.435575	0.412226	0.462417	0.206011	0.549562	0.396746	0.724817	0.400582	0.27148	0.474494	0.366885	-0.240622	0.348144	0.157583	0.116917	0.345459	0.378218	0.405997	0.507382	0.370953	-0.0350435	0.868172	0.101385	0.590475		0.261301	0.00672063	0.228543	0.0221872		0.398205	0.169124	0.588766	0.120314
1.61827	1.62255	1.61577	1.51133	1.6172	1.63427	1.24883	1.26425	1.38119	1.6828	1.76762	1.78581	1.6689	1.64054	1.60358	1.31428	1.32292	1.38023	1.61345	1.6296	1.56043	1.33312	1.42679	1.14643	1.24151	1.18956	1.26717	1.61886	1.5876	1.29809	1.74541	1.63767	1.33914	1.60116	1.30211	1.23275	-0.368414	0.000622665	-0.299046	0.0179799		-0.406267	0.000646232	-0.107739	0.0434452		-0.320774	0.00169957	-0.0312637	0.509414
-0.0851061	-0.323943	-0.527217	-0.414457	-0.452045	-0.401015	-0.255586	-0.411762	-0.425538	-0.215381	-0.119461	-0.152696	-0.0436223	-0.35171	-0.110609	-0.0874567	0.0473452	-0.10121	-0.22411	0.0254571	-0.0642202	0.298885	0.333739	0.446313	0.12511	-0.0434282	0.0651402	-0.312089	-0.422506	-0.364295	-0.162513	-0.168647	-0.0471072	-0.0876243	0.359646	0.0489407	0.136565	0.122609	0.44727	0.006782		0.115405	0.0464334	-0.00613427	0.970467		-0.0522068	0.826299	-0.110417	0.47881
-1.6359	-1.47	-1.63365	-1.48426	-1.80216	-1.89382	-1.26513	-1.35549	-1.60501	-1.6742	-1.3565	-1.74988	-1.49983	-1.28935	-1.30772	-1.41327	-1.3606	-1.18107	-1.68097	-1.51729	-1.74913	-1.29934	-1.90607	-1.5678	-1.63477	-1.52946	-1.55341	-1.57985	-1.72675	-1.40854	-1.59352	-1.36564	-1.31831	-1.64913	-1.59107	-1.57255	0.0765824	0.304978	0.0580579	0.847378		0.275209	0.0552671	0.227887	0.158659		0.171305	0.131267	-0.146898	0.353408
1.93913	1.64514	1.8508	1.92035	1.71596	1.9157	2.05585	1.98616	1.87965	1.62152	1.4288	1.56954	1.49206	1.68965	1.679	1.95767	1.94179	1.80594	1.6297	1.73474	1.77051	1.84614	1.7454	1.90204	1.86819	1.96176	1.85859	1.81169	1.85067	1.97388	1.53995	1.62024	1.9018	1.71165	1.8312	1.89618	0.184531	0.0162853	0.119544	0.094605		0.361845	0.00454004	0.080284	0.416635		0.162195	0.109281	0.0389804	0.817245
1.44523	1.38379	1.34481	1.31251	1.26906	1.24246	2.01559	2.05045	2.13193	1.64826	1.63369	1.41892	1.34756	1.52159	1.3231	2.46696	2.38681	2.45819	1.06915	0.988081	0.993726	0.276478	0.134904	0.456542	1.38647	1.35617	1.30134	1.39128	1.27467	2.06599	1.56696	1.39741	2.43732	1.01698	0.289308	1.34799	0.331011	0.00147888	-0.727677	0.00269565		0.870363	0.000609164	-0.169543	0.140681		0.674714	0.0003875	-0.116602	0.038788
-0.407308	-1.19236	-0.904172	-0.260355	-1.02887	-0.133654	-0.614083	-0.909954	-1.36922	-0.788685	-0.641023	-0.882372	-0.703681	-0.551852	-0.453048	-0.674451	-0.883574	-1.37093	-1.09787	-1.01365	-1.04355	-0.906779	-1.09492	-0.923195	-0.794179	-0.79412	-0.837364	-0.834612	-0.474294	-0.96442	-0.770693	-0.569527	-0.976317	-1.05169	-0.974966	-0.808554	0.243133	0.00172399	0.0767209	0.273622		-0.205624	0.302034	0.201166	0.107916		-0.129807	0.804763	0.360319	0.397577
-0.974969	-1.38862	-1.78859	-1.04868	-0.71782	-1.13248	-1.34233	-1.46931	-1.3758	-1.82637	-1.91057	-1.79717	-1.16359	-0.685142	-0.867448	-0.987047	-1.20101	-1.2119	-2.08075	-1.91029	-1.83878	-0.894466	-0.641732	-1.05934	-1.30061	-1.72664	-1.43714	-1.38406	-0.966328	-1.39581	-1.8447	-0.905394	-1.13332	-1.94327	-0.865179	-1.48813	0.455143	0.0202759	1.0781	0.0025685		0.711384	0.000946066	0.93931	0.00708943		-0.0117532	0.979079	0.417732	0.189818
0.406771	0.368717	0.439439	-0.15619	-0.325474	-0.333876	-0.340252	-0.378079	-0.371187	0.411318	0.44103	0.300955	-0.232859	-0.189429	-0.196852	-0.440098	-0.441101	-0.326824	-0.248654	-0.0842135	-0.0914428	-0.434173	-0.439491	-0.243857	-1.09837	-0.589771	-0.848038	0.404976	-0.271847	-0.363173	0.384434	-0.20638	-0.402674	-0.141437	-0.372507	-0.845394	-0.703958	0.00845084	-0.23107	0.0361316		-0.787109	0.00033463	-0.590814	0.00401702		-0.768149	0	-0.676823	0.00591837
0.116673	-0.0227158	0.0815694	0.443604	0.365108	0.311225	0.239266	0.207902	0.0553148	0.0301774	-0.0208912	0.129472	0.406797	0.27532	0.446378	0.217483	0.224978	0.15651	0.207735	0.138775	0.040189	0.360899	0.388032	0.559974	0.321149	0.212643	0.472258	0.0585088	0.373312	0.167494	0.0462526	0.376165	0.199657	0.128899	0.436302	0.33535	0.20645	0.0454861	0.307402	0.0136534		0.153405	0.0153107	0.329912	0.0140502		0.108985	0.119639	0.314803	0.0127421
1.85186	1.86403	1.90817	2.06408	2.03727	2.02197	1.73625	1.70244	1.75683	2.01254	2.03989	1.91526	2.08556	2.13489	2.18351	1.7282	1.75293	1.6837	2.02757	2.07781	2.05882	2.04752	1.97778	1.88758	1.85008	2.08688	2.01519	1.87469	2.04111	1.73184	1.98923	2.13465	1.72161	2.05474	1.97096	1.98405	-0.0706856	0.319771	-0.0837789	0.120247		-0.26762	0.00231668	0.14542	0.0386074		-0.142844	0.00281302	0.166417	0.0064917
-0.304497	-0.408457	-0.388157	-0.0593452	-0.0137072	-0.118193	-0.194456	-0.235354	-0.0266263	-0.528201	-0.31641	-0.436725	-0.151245	0.0703437	-0.496993	-0.054595	-0.0493479	0.0492229	-0.215692	-0.130877	-0.0823805	0.0543783	0.0165539	-0.00229788	-0.59532	-0.763696	-0.853556	-0.367037	-0.0637485	-0.152145	-0.427112	-0.192631	-0.01824	-0.142983	0.0228781	-0.737524	-0.594541	0.00267963	0.165861	0.013564		0.408872	0.00256589	0.234481	0.240232		0.214892	0.0213072	0.303288	0.0090291
-3.18315	-1.94446	-2.58431	-3.47968	-2.41041	-1.36601	-2.77639	-2.77836	-3.07961	-1.77095	-2.6813	-2.98333	-2.49071	-2.81079	-1.84268	-2.97889	-3.24385	-3.41364	-2.48588	-2.58245	-2.79203	-2.14981	-2.47788	-2.60984	-2.62647	-3.22859	-2.28332	-2.57064	-2.4187	-2.87812	-2.47853	-2.38139	-3.21213	-2.62012	-2.41251	-2.71279	-0.0926743	0.856001	0.207609	0.238427		-0.733595	0.0603713	0.0971388	0.901714		-0.307481	0.421518	0.15194	0.895953
0.737812	0.756613	0.843241	0.885013	1.02663	1.00462	0.522966	0.53847	0.575237	0.915914	1.04371	1.16411	0.868405	0.848661	0.758278	0.569775	0.546224	0.571812	1.68013	1.6038	1.5714	1.4382	1.49391	1.2769	0.451844	0.317008	0.485442	0.779222	0.972089	0.545558	1.04124	0.825115	0.562603	1.61844	1.403	0.418098	-1.20035	0.000494024	-0.215441	0.029346		-0.478641	0.00202825	-0.216129	0.0505802		-0.233665	0.00219052	0.192867	0.0323722
0.159948	0.264493	0.153829	0.318624	0.478392	0.538113	0.506996	0.653406	0.647303	0.157194	0.0993385	0.26487	0.345331	0.427626	0.407827	0.673346	0.781482	0.829395	0.118325	-0.251691	-0.100799	0.533113	0.589822	0.353714	0.557185	0.328608	0.556076	0.192757	0.445043	0.602569	0.173801	0.393595	0.761408	-0.0780547	0.492217	0.480623	0.558678	0.00963648	0.570271	0.0100556		0.587606	0.000941408	0.219794	0.0202989		0.409812	0.00210635	0.252286	0.0359051
1.81104	1.91124	1.95451	1.64541	1.41702	1.31714	1.00841	1.15993	1.0058	1.9785	1.88841	1.90941	1.38718	1.48183	1.51752	1.04008	0.929893	0.860993	1.37719	1.71189	1.6605	1.04317	0.798369	0.92994	1.0739	1.27145	1.06501	1.89226	1.45986	1.05805	1.92544	1.46218	0.943657	1.58319	0.923828	1.13679	-0.446405	0.0146685	-0.659366	0.00679559		-0.981782	0.000301783	-0.463261	0.00446918		-0.834218	0.000385488	-0.432408	0.0239073
1.053	1.14289	1.10275	1.24017	1.22792	1.2091	1.0811	1.02609	1.18589	1.02316	1.06392	1.00029	1.28853	1.3838	1.26298	1.14752	1.08701	1.12481	1.0263	1.09207	0.805443	0.887957	0.732909	0.830773	1.22264	1.37344	1.21764	1.09955	1.22573	1.09769	1.02912	1.31177	1.11978	0.974604	0.817213	1.27124	0.296637	0.0239668	-0.157391	0.141512		0.090658	0.0108805	0.282646	0.00613981		-0.00185585	0.986171	0.126179	0.0183733
0.389078	0.283467	0.328855	0.329555	0.206506	0.330368	0.2881	0.337915	0.300158	0.160862	0.0946016	0.1491	0.164074	0.266766	0.139194	0.201024	0.140821	0.223227	0.280322	0.207572	0.33021	0.28667	0.430372	0.298752	0.216905	0.142609	0.106678	0.3338	0.288809	0.308725	0.134855	0.190012	0.188357	0.272702	0.338598	0.155397	-0.117304	0.03981	0.0658965	0.294617		0.0535027	0.0831143	0.0551569	0.26611		-0.0250753	0.5124	-0.0449906	0.465821
-2.93589	-2.36153	-3.05123	-3.04377	-2.30766	-2.77053	-2.34928	-2.40281	-2.55161	-2.62957	-2.78459	-3.07273	-2.75621	-2.85878	-2.87625	-2.71044	-2.47351	-2.53814	-2.93984	-2.80122	-3.36979	-2.69291	-3.55068	-3.77447	-2.79872	-2.70479	-3.29949	-2.78288	-2.70732	-2.43457	-2.82896	-2.83041	-2.57403	-3.03695	-3.33935	-2.93433	0.10262	0.802086	-0.302401	0.487625		0.254934	0.0769191	-0.00144903	0.99432		0.348312	0.1152	0.0755616	0.877467
0.0486906	-0.0124204	-0.177479	-0.253358	-0.467303	-0.37185	-0.0639336	-0.00755954	-0.163388	-0.0896804	-0.0517912	-0.0956204	-0.477363	-0.33152	-0.392966	0.189708	0.0529313	0.149452	-0.119733	-0.163774	-0.214712	0.0147736	-0.111657	0.0129733	0.0613849	-0.403669	-0.0760098	-0.0470695	-0.364171	-0.0782939	-0.0790307	-0.400616	0.130697	-0.166073	-0.0279701	-0.139431	0.0266416	0.921772	0.138103	0.0360605		0.209728	0.00445982	-0.321586	0.00515924		-0.0312244	0.822082	-0.317101	0.0336734
1.14526	1.1876	1.17934	1.29073	1.41094	1.3334	0.996109	0.859032	1.02902	1.13062	1.16559	1.20375	1.32964	1.17185	1.21309	1.03917	1.02676	1.06164	1.26396	1.28089	1.20192	1.2367	1.27824	1.00786	0.838001	0.717873	0.831481	1.17073	1.34502	0.961387	1.16665	1.23819	1.04253	1.24892	1.17427	0.795785	-0.453138	0.000969697	-0.0746541	0.460406		-0.124128	0.00363727	0.0715385	0.225758		-0.209346	0.0105319	0.174288	0.0177046
-1.47573	-1.60885	-1.14597	-0.741817	-0.79414	-1.05038	-1.78946	-1.94863	-2.09424	-1.06783	-0.986412	-1.07965	-0.482411	-0.50997	-0.489639	-1.54541	-1.75772	-1.8281	-1.18856	-1.2353	-1.36164	-0.830411	-0.931186	-0.736856	-1.47085	-1.76475	-1.48181	-1.41018	-0.862112	-1.94411	-1.04463	-0.494007	-1.71041	-1.26183	-0.832817	-1.57247	-0.310637	0.0263375	0.429017	0.00613007		-0.66578	0.00143449	0.550624	0.00258333		-0.533925	0.0168431	0.548073	0.0384821
0.798264	1.00385	0.929242	1.16634	1.29196	1.23344	0.995422	0.994917	1.03141	1.02826	0.986876	0.992651	1.41879	1.27043	1.47153	1.26292	1.2697	1.18441	0.850934	0.795663	0.774235	0.864092	1.02341	0.820817	1.14804	1.09314	1.10833	0.910452	1.23058	1.00725	1.0026	1.38692	1.23901	0.806944	0.902773	1.1165	0.309558	0.000796592	0.0958295	0.177128		0.236415	0.00127241	0.384322	0.00754629		0.0967979	0.113534	0.320127	0.0185623
2.61118	2.53315	2.66977	3.05623	2.96501	2.98126	2.75999	2.79607	2.83109	2.84106	2.68509	2.7189	3.04948	3.09626	3.17999	2.81257	2.76012	2.80186	3.03784	3.14466	3.05264	3.47006	3.35089	3.50788	3.32236	3.23898	3.19949	2.6047	3.00083	2.79571	2.74835	3.10857	2.79152	3.07838	3.44295	3.25361	0.17523	0.0151266	0.364565	0.00531656		0.0431638	0.364199	0.360221	0.00847273		0.191012	0.00805119	0.396131	0.00638424
-0.168006	0.0469697	-0.148615	0.0373287	0.293407	-0.012095	-0.0141184	-0.0873029	-0.196386	-0.0013001	-0.0683637	-0.137944	0.0359333	-0.251556	-0.0306909	-0.107931	-0.16234	-0.165475	0.0605142	0.0212514	-0.0560081	0.000998735	0.0426631	-0.228281	-0.120234	-0.211022	-0.106452	-0.0898837	0.106214	-0.0992692	-0.0692024	-0.0821046	-0.145248	0.00858585	-0.0615396	-0.145903	-0.154488	0.0186656	-0.0701254	0.51878		-0.076046	0.0750271	-0.0129022	0.937606		-0.00938543	0.954649	0.196097	0.166446
-0.991107	-0.679606	-0.701055	-0.91183	-1.00537	-0.886592	-1.11165	-0.968004	-1.17443	-0.976494	-0.972977	-0.68227	-0.9784	-0.910425	-0.935521	-1.56081	-1.31403	-1.35193	-0.434346	-0.392369	-0.467326	-0.678144	-0.675634	-0.972564	-1.31688	-1.37935	-1.00963	-0.790589	-0.934598	-1.08469	-0.877247	-0.941449	-1.40892	-0.431347	-0.775447	-1.23529	-0.803939	0.00271726	-0.3441	0.0196956		-0.531675	0.00632196	-0.0642016	0.620898		-0.294104	0.0352434	-0.144009	0.24822
-0.150652	-0.202316	-0.236846	-0.421498	-0.476281	-0.361763	-0.183999	-0.0293901	-0.09181	-0.243264	-0.112157	-0.256105	-0.289095	-0.140638	-0.472787	-0.086513	-0.0844221	-0.0699229	-0.475972	-0.559464	-0.438333	-0.498003	-0.443689	-0.487805	-0.222762	-0.296287	-0.292972	-0.196604	-0.419847	-0.101733	-0.203842	-0.30084	-0.080286	-0.491256	-0.476499	-0.270674	0.220583	0.00607089	0.0147573	0.809687		0.123556	0.0246249	-0.096998	0.429385		0.0948715	0.0790865	-0.223243	0.0130944
0.933643	0.883644	0.910427	0.729642	0.674177	0.819545	0.745658	0.558993	0.57896	0.45372	0.595486	0.478962	0.499728	0.664814	0.408302	0.482556	0.415935	0.489299	0.790236	0.744714	0.885705	0.790019	0.846751	0.756721	0.666115	0.509605	0.503207	0.909238	0.741121	0.62787	0.509389	0.524281	0.462597	0.806885	0.79783	0.559642	-0.247243	0.0137915	-0.00905466	0.913905		-0.0467928	0.301258	0.0148919	0.920456		-0.281368	0.00638353	-0.168117	0.0276398
2.38896	2.02798	2.18499	2.35912	2.01732	2.15014	2.43634	2.42451	2.27479	2.01851	1.86626	1.78931	2.07494	2.05756	2.24302	2.21707	2.18551	2.25808	1.42611	1.31148	1.05993	1.84973	1.20838	1.74219	2.03032	2.05392	1.898	2.20065	2.17553	2.37855	1.89136	2.12517	2.22022	1.26584	1.6001	1.99408	0.728241	0.00361029	0.334259	0.171189		0.328861	0.00511793	0.233814	0.0560331		0.177903	0.123312	-0.0251186	0.916316
-0.295004	-0.453315	-0.411384	-0.500471	-0.423455	-0.572047	-1.1825	-1.08841	-1.38941	-0.171893	-0.342824	0.0213878	-0.371578	-0.948042	-0.613608	-1.02676	-1.00443	-0.842403	-0.288396	-0.0879614	-0.267248	-0.85039	-1.02249	-1.22165	-1.15509	-1.73118	-1.45346	-0.386568	-0.498658	-1.22011	-0.164443	-0.644409	-0.957865	-0.214535	-1.03151	-1.44658	-1.23204	0.00272163	-0.816977	0.0043103		-0.793422	0.00201775	-0.479966	0.0679085		-0.833538	0.00141822	-0.11209	0.151605
-0.740032	-0.86434	-0.853094	-0.60555	-0.818044	-0.822288	-0.334578	-0.29767	-0.252251	-0.753805	-0.676275	-0.699788	-0.692787	-0.530177	-0.489758	0.034224	0.0252924	-0.0745316	-1.0424	-0.911281	-0.672791	-0.97282	-0.800015	-0.783374	-0.232084	-0.318711	-0.332851	-0.819155	-0.748627	-0.294833	-0.709956	-0.570908	-0.00500504	-0.875491	-0.852069	-0.294549	0.580943	0.00589458	0.0234219	0.911532		0.704951	0.000308555	0.139048	0.0947067		0.524322	0.000418692	0.0705283	0.476242
0.379412	0.451913	0.268062	0.484847	0.45642	0.635188	0.904359	0.965948	0.841705	0.2371	0.177502	0.203628	0.119134	0.260081	0.0170472	0.516926	0.668951	0.513895	0.34843	0.351905	0.394751	0.506406	0.0861859	0.506407	0.598831	0.664786	0.576761	0.366462	0.525485	0.904004	0.206077	0.132087	0.566591	0.365029	0.366333	0.613459	0.248431	0.00170167	0.00130415	0.99639		0.360514	0.00191252	-0.0739893	0.367853		0.537542	0.00138562	0.159023	0.10743
-0.452325	-0.347327	-0.599632	-0.0874386	0.000360489	0.0577292	-0.323529	-0.239919	-0.319154	-0.343692	-0.366314	-0.525461	0.133725	0.150667	0.349798	-0.285172	-0.317409	-0.302326	0.240047	0.161201	0.201746	0.887967	0.715731	1.16812	-0.242965	0.13282	-0.0995235	-0.466428	-0.00978295	-0.294201	-0.411823	0.211397	-0.301636	0.200998	0.923938	-0.0698894	-0.270887	0.0403069	0.72294	0.00670366		0.110187	0.0603838	0.62322	0.00593831		0.172227	0.0502239	0.456645	0.0129394
-1.02651	-1.10449	-1.01739	-0.582028	-0.872573	-0.735843	-0.90986	-0.956525	-1.14123	-0.546433	-0.68153	-0.909355	-0.741803	-0.546183	-0.708638	-0.740363	-0.512375	-0.725883	-1.26711	-1.00317	-1.13308	-1.05464	-1.24277	-1.07065	-1.06762	-1.16765	-0.997671	-1.04946	-0.730148	-1.00254	-0.71244	-0.665541	-0.65954	-1.13445	-1.12268	-1.07765	0.0568071	0.625828	0.0117704	0.945707		0.052899	0.818593	0.0468981	0.803424		0.0469262	0.637471	0.319317	0.0304734
-2.64827	-2.62555	-2.23798	-2.11163	-1.97631	-2.05432	-2.34664	-2.45034	-2.38592	-2.33205	-2.72334	-2.54957	-2.47998	-2.65643	-2.3141	-2.2979	-2.74962	-2.31253	-2.41515	-2.58608	-2.74446	-2.453	-3.63669	-2.51943	-2.26796	-2.26973	-2.62945	-2.50393	-2.04742	-2.3943	-2.53499	-2.48351	-2.45335	-2.5819	-2.86971	-2.38905	0.192849	0.196087	-0.28781	0.55202		0.0816347	0.800974	0.0514804	0.827562		0.109631	0.444238	0.456514	0.0380307
2.55369	2.61092	2.54048	2.2017	2.11529	2.06708	1.63111	1.61606	1.59754	2.58696	2.57152	2.51484	2.1381	2.06597	2.13918	1.62706	1.59336	1.61573	2.81749	2.79278	2.80526	2.92729	2.80213	3.02085	2.09822	2.25704	2.06151	2.56836	2.12803	1.6149	2.55778	2.11442	1.61205	2.80518	2.91676	2.13892	-0.666256	0.000798292	0.111578	0.116633		-0.945724	0	-0.443359	0.00456039		-0.953462	0	-0.440338	0.00574046
-2.46569	-2.26687	-2.00198	-1.73557	-1.68956	-1.62647	-2.04757	-1.89114	-1.95502	-2.1165	-2.25012	-2.40234	-2.04902	-1.70087	-1.8333	-1.97806	-2.17359	-2.04216	-2.55151	-2.18677	-2.12035	-1.75471	-1.68282	-1.94222	-1.81655	-2.11442	-2.13969	-2.24485	-1.68387	-1.96458	-2.25632	-1.86107	-2.0646	-2.28621	-1.79325	-2.02355	0.262661	0.12279	0.492963	0.0240767		0.19172	0.0602299	0.395258	0.0404477		0.280269	0.0670158	0.560981	0.0240807
-0.715369	-0.562989	-0.401425	-0.233853	-0.57026	-0.429231	-0.19901	-0.154675	-0.351643	-0.631193	-0.416068	-0.594395	-0.385457	-0.571871	-0.7833	-0.275547	-0.0480251	-0.0448022	-0.640967	-0.447692	-0.350281	-0.413704	-0.438879	-0.399002	-0.130787	-0.230558	-0.185359	-0.559928	-0.411115	-0.235109	-0.547219	-0.580209	-0.122791	-0.479647	-0.417195	-0.182235	0.297412	0.0183446	0.0624517	0.554128		0.424428	0.00670205	-0.0329907	0.878754		0.324818	0.0215765	0.148813	0.335695
-0.784486	-0.853201	-0.772313	-0.995381	-0.878913	-0.886851	-1.23004	-1.33493	-1.52134	-0.593948	-0.625723	-0.644772	-0.773535	-0.52273	-0.622437	-0.97173	-0.953893	-0.962673	-0.725546	-0.68183	-0.512069	-0.396613	-0.491867	-0.198642	-0.642277	-1.00023	-0.911613	-0.803333	-0.920382	-1.3621	-0.621481	-0.639567	-0.962765	-0.639815	-0.362374	-0.851375	-0.21156	0.101562	0.277441	0.0438783		-0.341284	0.000229117	-0.0180865	0.881806		-0.558768	0.00252107	-0.117049	0.0658564
1.11903	0.653265	0.624168	1.59483	0.335274	0.81376	0.806066	0.214416	0.833892	1.42144	0.644992	0.910299	1.47484	1.4459	1.25355	0.171872	0.58984	0.95251	1.24321	1.47699	1.32508	1.78789	1.50744	1.49976	1.10463	0.706448	0.98542	0.79882	0.914621	0.618125	0.992243	1.39143	0.571407	1.34843	1.59836	0.932165	-0.416264	0.0219861	0.249935	0.0710813		-0.420835	0.14856	0.399189	0.153207		-0.180695	0.549994	0.115801	0.856168
0.543831	0.539535	0.437115	0.555021	0.482995	0.427112	0.433029	0.482705	0.179657	0.622089	0.654784	0.639735	0.768354	0.818748	0.771212	0.584439	0.655169	0.550866	0.672584	0.704967	0.769073	0.837442	0.545502	0.758334	0.761583	0.93277	0.717068	0.506827	0.488376	0.36513	0.638869	0.786105	0.596825	0.715541	0.713759	0.803807	0.0882655	0.204948	-0.00178194	0.991968		-0.0420442	0.150156	0.147236	0.00479012		-0.141697	0.145297	-0.0184508	0.813322
0.832702	0.807296	0.740907	1.17182	1.02225	1.26937	1.3948	1.43917	1.41308	0.62052	0.350867	0.236394	0.713729	0.946597	0.617816	0.477654	0.81655	0.725111	-0.0596039	-0.0342362	0.130305	0.265967	0.0672688	0.321898	0.357057	0.743942	0.482409	0.793635	1.15448	1.41568	0.402593	0.75938	0.673105	0.012155	0.218378	0.527803	0.515648	0.0111142	0.206223	0.0733536		0.270511	0.0720807	0.356787	0.0714678		0.622048	0	0.360848	0.0174634
1.61442	1.59811	1.60387	1.44478	1.56138	1.5304	1.16362	1.13549	1.16846	1.51743	1.59713	1.66406	1.56533	1.52331	1.47027	1.25744	1.18039	1.25999	1.47013	1.49452	1.50896	1.25332	1.35392	1.1356	1.16779	1.06197	1.15517	1.60547	1.51218	1.15586	1.59287	1.51964	1.23261	1.4912	1.24762	1.12831	-0.362891	0.0010352	-0.243586	0.0141911		-0.360267	0.00150326	-0.0732388	0.206108		-0.449608	0	-0.0932834	0.0625831
-1.08993	-1.10495	-1.23535	-0.532645	-0.49035	-0.583233	-0.33829	-0.532531	-0.4741	-0.991426	-0.816791	-1.02613	-0.468784	-0.695615	-0.545556	-0.316833	-0.403543	-0.411254	-1.28884	-1.14849	-1.17028	-1.05413	-0.826972	-1.16132	-0.612952	-0.442282	-0.585544	-1.14341	-0.53541	-0.448307	-0.944783	-0.569985	-0.37721	-1.20254	-1.01414	-0.546926	0.655611	0.000912752	0.188397	0.116902		0.567573	0.00123839	0.374798	0.0203362		0.695106	0.00111002	0.608003	0.00677043
-0.232163	-0.237202	-0.192567	-0.215204	-0.199165	-0.125449	-0.359527	-0.265402	-0.463941	-0.249751	-0.239663	-0.220213	0.0721657	-0.178771	-0.0372617	-0.0791683	-0.0661535	-0.0758033	-0.452729	-0.473772	-0.45485	-0.252758	-0.177491	-0.0963683	-0.0281971	-0.154435	-0.12253	-0.220644	-0.179939	-0.362957	-0.236542	-0.0479556	-0.0737084	-0.46045	-0.175539	-0.101721	0.358729	0.0012425	0.284911	0.00546928		0.162834	0.000317919	0.188587	0.0578656		-0.142313	0.0396268	0.0407046	0.260948
-1.05944	-1.13154	-1.04271	-1.34176	-1.24984	-1.41872	-1.33613	-1.30986	-1.24996	-0.176169	-0.326242	-0.146282	-0.691415	-0.948572	-0.777426	-1.08025	-1.09077	-0.945232	-0.32578	-0.303605	-0.444152	-1.69678	-1.5395	-1.64813	-1.38183	-1.14391	-1.11254	-1.0779	-1.33677	-1.29865	-0.216231	-0.805804	-1.03875	-0.357845	-1.62813	-1.21276	-0.854915	0.00176894	-1.27029	0		-0.822518	0.000539046	-0.589573	0.0075736		-0.220757	0.00284253	-0.258878	0.0177179
-3.22413	-2.45374	-3.37406	-3.08799	-3.12852	-2.51495	-1.42469	-1.61655	-1.22265	-2.41585	-2.48009	-2.29197	-2.5254	-2.65354	-1.85361	-1.32475	-1.12566	-1.36554	-2.11841	-2.95308	-2.92102	-2.57643	-1.72332	-2.43803	-1.22771	-1.88017	-1.85314	-3.01731	-2.91049	-1.4213	-2.39597	-2.34418	-1.27198	-2.66417	-2.24593	-1.65367	1.0105	0.0246075	0.418242	0.309479		1.12399	0.000269592	0.0517871	0.905477		1.59601	0.00432256	0.106821	0.844765
-0.275291	-0.307464	-0.140726	0.28082	0.186537	0.123233	0.504766	0.552004	0.485225	-0.278316	-0.377322	-0.186543	0.171566	0.0708039	0.328872	0.616063	0.716993	0.642449	-0.653757	-0.804024	-0.527299	0.0224574	0.0636005	0.0421324	0.293059	0.455986	0.251882	-0.24116	0.196863	0.513998	-0.280727	0.190414	0.658502	-0.661694	0.0427301	0.333642	0.995336	0.000954386	0.704424	0.00205054		0.939229	0.000240175	0.471141	0.0131522		0.755158	0.000453333	0.438024	0.0102999
-0.368854	-0.50157	-0.582175	-0.365317	-0.263724	-0.202385	-0.0399649	0.0227349	-0.161709	-0.492088	-0.457195	-0.440465	-0.290503	-0.282033	-0.318346	0.0217695	0.0823908	-0.0409846	-0.192887	-0.235619	-0.247825	-0.483033	-0.422572	-0.351381	-0.295069	-0.310602	-0.207934	-0.484199	-0.277142	-0.0596464	-0.463249	-0.296961	0.0210586	-0.225443	-0.418995	-0.271202	-0.0457582	0.191832	-0.193552	0.00838428		0.484308	0.000285004	0.166288	0.00478699		0.424553	0.00453868	0.207057	0.0629867
-1.88254	-1.77417	-1.43675	-1.51055	-1.88397	-1.78678	-1.72295	-2.15475	-2.02368	-1.75711	-1.69193	-1.7635	-1.58669	-1.42201	-1.6445	-1.71946	-2.18579	-1.81442	-1.96765	-1.77549	-1.69762	-1.88245	-1.40452	-1.84135	-1.60158	-2.11102	-2.15709	-1.69782	-1.7271	-1.96713	-1.73751	-1.55107	-1.90656	-1.81359	-1.70944	-1.95657	-0.142978	0.521592	0.104147	0.647679		-0.169047	0.190734	0.18644	0.0543228		-0.269306	0.137316	-0.0292761	0.91997
-1.54542	-1.27961	-1.49057	-1.15938	-1.49271	-1.67896	-2.28959	-0.880828	-1.87046	-1.78404	-1.96709	-1.9354	-1.66394	-1.53853	-2.017	-1.03376	-1.45158	-1.44218	-1.54288	-1.99124	-1.62178	-1.84471	-1.68777	-1.82402	-1.54286	-1.68085	-1.56099	-1.43853	-1.44369	-1.68029	-1.89551	-1.73982	-1.30917	-1.71863	-1.7855	-1.5949	0.123733	0.414303	-0.0668708	0.757247		0.586339	0.00830106	0.15569	0.372219		-0.241758	0.685151	-0.00515072	0.985749
6.25449	6.21877	6.26212	6.28142	6.21171	6.22677	5.97257	5.90007	6.10397	6.24766	6.43091	6.28894	6.18862	6.19456	6.08332	5.83323	5.75913	5.84988	6.42679	6.38735	6.38046	6.32426	6.3288	6.07332	5.8791	6.08984	5.82478	6.24513	6.23997	5.9922	6.3225	6.1555	5.81408	6.3982	6.24213	5.93124	-0.466959	0.00478586	-0.156074	0.106045		-0.508421	0.00112844	-0.167003	0.061768		-0.252925	0.00896166	-0.00516049	0.900569
-1.68213	-1.61935	-1.87649	-2.02966	-1.46956	-1.58287	-1.69041	-1.8985	-1.65222	-2.00759	-1.58145	-1.6852	-1.97169	-1.58558	-1.57832	-1.65605	-2.79398	-2.14379	-1.77279	-2.69726	-2.22898	-2.29189	-2.28662	-1.63114	-1.99788	-2.00791	-1.60122	-1.72599	-1.69403	-1.74704	-1.75808	-1.71187	-2.19794	-2.23301	-2.06988	-1.869	0.364007	0.210215	0.163131	0.745775		-0.439861	0.168853	0.0462126	0.876462		-0.0210547	0.918579	0.031958	0.918668
2.65014	2.77682	2.58924	2.7341	2.37063	2.36465	2.62984	2.73489	2.54265	2.72126	2.64272	2.58208	2.56311	2.3826	2.55878	2.73557	2.98449	2.42072	2.38927	2.53654	2.44097	2.11234	2.00269	2.18664	2.21335	2.26557	2.41897	2.67207	2.48979	2.6358	2.64869	2.5015	2.71359	2.45559	2.10056	2.29929	-0.156299	0.0602105	-0.355036	0.00700887		0.0649047	0.833955	-0.147189	0.101423		-0.0362692	0.766643	-0.182272	0.245242
1.4678	1.52406	1.54804	1.69079	1.75346	1.94383	2.48582	2.54052	2.61534	1.49664	1.43635	1.41143	1.79559	1.98786	1.78228	2.77841	2.83113	2.95086	1.30024	1.42418	1.5185	1.55476	1.73481	1.43666	2.67372	2.46402	2.34492	1.5133	1.79603	2.54723	1.44814	1.85525	2.85347	1.4143	1.57541	2.49422	1.07992	0.00107566	0.161105	0.16552		1.40533	0.000295385	0.407106	0.00917545		1.03393	0	0.282734	0.0318333
0.921876	0.963483	0.94635	0.995872	0.858312	0.818318	0.196427	0.109769	0.107583	0.842048	0.865318	0.781976	0.747974	0.728651	0.902562	-0.0235662	0.0193119	-0.0848503	1.08561	1.13025	1.09857	1.4999	1.33335	1.66784	0.730331	0.899247	0.674604	0.943903	0.890834	0.137926	0.829781	0.793062	-0.0297016	1.10481	1.50036	0.768061	-0.336747	0.00705077	0.395555	0.012346		-0.859482	0.00023301	-0.0367184	0.648918		-0.805977	0	-0.0530692	0.41511
0.347154	0.329437	0.375182	0.300114	0.137953	0.176612	0.17022	0.0500085	0.183881	0.441077	0.503942	0.600207	0.489536	0.403943	0.35027	0.386985	0.364509	0.440238	0.588416	0.686701	0.713528	0.355942	0.60197	0.499664	0.373683	0.386744	0.328328	0.350591	0.204893	0.134703	0.515076	0.414583	0.397244	0.662882	0.485859	0.362918	-0.299964	0.00255876	-0.177023	0.0665266		-0.117832	0.0371344	-0.100493	0.162978		-0.215888	0.00544775	-0.145698	0.0517123
-0.512704	-0.170422	-0.208666	-0.239094	-0.162996	-0.489668	-0.317075	-0.58023	-2.72947	-0.873809	0.00198317	-0.203163	-0.633212	-0.889387	-0.632433	-0.453811	-0.524764	-0.751718	-0.570397	-0.549948	-0.21747	-0.556435	-0.39255	-0.568518	-0.948999	-0.309467	-0.376944	-0.297264	-0.297253	-1.20892	-0.358329	-0.718344	-0.576764	-0.445939	-0.505834	-0.545136	-0.0991979	0.78901	-0.0598958	0.747469		-0.218435	0.443353	-0.360015	0.251807		-0.91166	0.213404	1.13646e-05	0.999972
-1.95273	-2.11381	-1.726	-2.16862	-2.14401	-1.19687	-2.19441	-2.12458	-2.44581	-1.39297	-1.96978	-1.6233	-2.1204	-2.34993	-2.54214	-3.4993	-2.33415	-2.5099	-1.55634	-2.03848	-2.01817	-2.51626	-2.6078	-1.87809	-2.07969	-1.96538	-1.96631	-1.93085	-1.8365	-2.25493	-1.66202	-2.33749	-2.78112	-1.871	-2.33405	-2.0038	-0.1328	0.44294	-0.463055	0.131594		-1.1191	0.0217014	-0.675476	0.0341996		-0.324088	0.0518653	0.0943476	0.863172
3.54856	3.49281	3.49274	3.71326	3.67084	3.70551	3.8188	3.80612	3.92529	3.46412	3.52269	3.50389	3.55748	3.73391	3.55094	4.00862	3.93966	3.98433	3.54529	3.43443	3.41476	3.52558	3.8504	3.58756	3.68972	3.62487	3.6751	3.51137	3.69654	3.85007	3.4969	3.61411	3.97754	3.46482	3.65451	3.66323	0.198408	0.00913166	0.189688	0.113948		0.480639	0.000354839	0.117213	0.121282		0.338699	0.00148023	0.185164	0.00637377
0.983406	1.05641	0.953523	1.19223	1.38632	1.32016	1.11538	1.09222	1.09209	0.983355	1.02088	1.0723	1.44646	1.28712	1.39821	1.27454	1.17758	1.30676	1.10795	1.22826	1.05639	1.22866	1.29968	1.0676	0.988821	0.805661	0.97411	0.997779	1.29957	1.0999	1.02551	1.37726	1.25296	1.13087	1.19864	0.922864	-0.208004	0.031116	0.0677765	0.502922		0.227449	0.00444289	0.351752	0.00708303		0.102118	0.0171591	0.30179	0.0177444
0.287984	0.433553	0.61606	0.24684	0.310961	0.559024	0.145023	0.60593	0.579513	0.0276787	0.184149	0.140566	-0.14091	-0.289983	0.283086	-0.0763931	0.136104	-0.0519762	0.284056	0.196324	0.303502	-0.0121076	0.308549	0.276142	0.441846	0.666912	0.106367	0.445866	0.372275	0.443489	0.117465	-0.049269	0.00257826	0.261294	0.190861	0.405042	0.143748	0.405899	-0.0704327	0.605		-0.114886	0.126681	-0.166734	0.413093		-0.00237687	0.995336	-0.0735907	0.694397
-0.858989	-1.30623	-0.73707	-1.72366	-1.21858	-1.88241	-0.995771	-1.20916	-1.55212	-2.32189	-3.53198	-1.75155	-2.64481	-2.09001	-3.01116	-1.93092	-2.96896	-1.87156	-0.330961	-0.229125	-0.132405	-2.34068	-1.05769	-0.832724	-2.86018	-1.37932	-1.19457	-0.96743	-1.60821	-1.25235	-2.53514	-2.582	-2.25715	-0.23083	-1.41037	-1.81136	-1.58053	0.0233618	-1.17954	0.0472525		0.277991	0.800847	-0.0468578	0.962783		-0.28492	0.205673	-0.640784	0.0758337
0.196221	-0.147019	0.352293	-0.10865	-0.151184	0.26715	0.490012	0.460949	0.598797	0.0826085	0.023427	0.104031	0.121454	-0.0231254	0.0099113	-0.0388775	-0.132354	-0.255922	0.270163	-0.0159967	0.114274	-0.887462	-0.411667	-0.693568	-0.239059	-0.258233	-0.139463	0.133832	0.00243902	0.516586	0.0700221	0.0360801	-0.142385	0.122813	-0.664232	-0.212252	-0.335065	0.013424	-0.787046	0.00762885		-0.212407	0.015046	-0.033942	0.595688		0.382754	0.0354588	-0.131393	0.614543
0.327224	0.445953	0.260898	0.204412	0.265481	0.377986	-0.129708	-0.0126646	-0.437469	0.48457	0.487206	0.607781	0.426148	0.269791	0.168876	-0.821293	-0.250374	-0.511144	0.521208	0.566165	0.423529	-0.12727	-0.0858898	-0.0922213	-0.722669	-0.467012	-0.590254	0.344692	0.282626	-0.19328	0.526519	0.288272	-0.527603	0.503634	-0.101794	-0.593312	-1.09695	0.000738552	-0.605428	0.000311864		-1.05412	0.00235039	-0.238247	0.0478987		-0.537972	0.0105439	-0.0620655	0.493654
-2.18572	-2.64128	-2.42726	-2.18774	-2.16462	-2.51104	-2.28375	-1.97337	-2.22936	-2.43227	-2.23121	-2.36305	-2.2606	-2.09419	-2.25825	-1.70109	-1.71318	-1.61141	-2.85254	-3.07602	-2.94995	-2.47666	-2.04466	-2.15165	-2.08255	-2.3688	-2.23438	-2.41809	-2.2878	-2.16216	-2.34218	-2.20435	-1.67523	-2.9595	-2.22432	-2.22857	0.730928	0.00267097	0.735181	0.00732145		0.666954	0.000695353	0.137831	0.147401		0.255925	0.114648	0.130283	0.548405
0.317484	0.38407	0.333227	0.21339	0.0448675	0.207978	0.828968	0.864465	0.878793	0.234394	0.272803	0.454902	0.0933549	0.17833	0.00219464	0.459399	0.389848	0.423549	0.78084	0.663223	0.768178	-0.197601	-0.0867314	-0.189742	0.618414	0.700452	0.621223	0.344927	0.155412	0.857409	0.3207	0.0912933	0.424265	0.737413	-0.158025	0.646697	-0.0907169	0.0685506	-0.895438	0		0.103565	0.115161	-0.229407	0.0519657		0.512482	0	-0.189515	0.0397476
0.670578	0.475333	0.478468	0.0335331	0.00807571	-0.102098	-0.26447	-0.294491	-0.191161	0.579108	0.66742	0.546693	-0.0108354	0.0292585	0.0351517	-0.408334	-0.280542	-0.30793	-0.0605676	0.207961	0.263793	-0.577234	-0.31415	-0.222461	-0.22672	-0.0595491	-0.236254	0.54146	-0.0201631	-0.250041	0.59774	0.0178583	-0.332269	0.137062	-0.371282	-0.174174	-0.311236	0.0306369	-0.508344	0.018603		-0.930009	0.00033033	-0.579882	0.00273939		-0.7915	0.000402878	-0.561623	0.00773856
-0.412283	-0.661961	-0.614781	-0.569175	-0.62607	-0.478	-0.534022	-0.687256	-0.414716	-0.722669	-0.928479	-0.698937	-0.759139	-0.687039	-0.802639	-0.73478	-0.649344	-0.559449	-0.738176	-0.668319	-0.52082	-0.840286	-0.537894	-0.838207	-0.647907	-0.863499	-1.06184	-0.563008	-0.557748	-0.545331	-0.783362	-0.749606	-0.647858	-0.642439	-0.738796	-0.857749	-0.215311	0.11636	-0.0963569	0.490552		0.135504	0.103565	0.0337559	0.781011		0.0176771	0.933407	0.00526007	0.970429
-0.689202	-0.494387	-0.499447	-0.902722	-1.14955	-1.08267	-1.29388	-1.05773	-1.01086	-0.422306	-0.276606	-0.458498	-0.829941	-0.709049	-0.707456	-1.68018	-1.65501	-1.3005	-1.20289	-0.76773	-1.2653	-2.363	-1.94758	-2.03654	-1.6746	-1.0121	-1.53151	-0.561012	-1.04498	-1.12083	-0.385803	-0.748816	-1.54523	-1.07864	-2.11571	-1.40607	-0.327432	0.187196	-1.03707	0.00704126		-1.15942	0.000920558	-0.363012	0.0119923		-0.559814	0.00451604	-0.483968	0.0157186
1.00024	1.00574	0.994433	0.915056	0.737442	0.78625	0.953957	0.954226	0.832825	1.12123	1.03291	1.00817	1.10341	1.07749	1.16466	1.09193	1.10724	1.05493	1.26043	1.31896	1.26543	1.82782	1.64241	1.96621	1.60568	1.75281	1.56748	1.00014	0.812916	0.91367	1.0541	1.11519	1.0847	1.28161	1.81214	1.64199	0.360382	0.00382986	0.530536	0.00629101		0.0305985	0.410655	0.0610847	0.214107		-0.0864677	0.0549767	-0.187221	0.0323856
-3.3837	-2.9917	-1.80598	-2.05412	-2.65469	-0.849103	-1.07273	-0.869827	-0.910653	-1.42204	-1.29478	-1.92777	-1.62449	-0.900969	-1.24296	-0.972361	-0.242372	-0.478991	-1.52947	-1.1777	-0.421871	-0.637102	-0.240533	-0.383672	-0.67482	-1.03619	-0.428996	-2.72713	-1.85264	-0.95107	-1.5482	-1.25614	-0.564575	-1.04302	-0.420436	-0.713335	0.329681	0.38877	0.62258	0.109446		0.983621	0.011833	0.292054	0.365007		1.77606	0.0120888	0.874488	0.291164
-1.18676	-1.30791	-1.25698	-1.31059	-1.30297	-1.42849	-1.70409	-1.4719	-2.04297	-0.987119	-1.21137	-0.868295	-1.5821	-1.91646	-1.37112	-1.13967	-1.38017	-1.10959	-1.6033	-1.58531	-1.33373	-2.16484	-1.37001	-2.2264	-1.93774	-1.63119	-1.4981	-1.25055	-1.34735	-1.73966	-1.02226	-1.62323	-1.20981	-1.50745	-1.92042	-1.68901	-0.181565	0.234488	-0.412971	0.185014		-0.187549	0.123678	-0.600964	0.0356724		-0.489106	0.023932	-0.0968006	0.14331
-1.05314	-1.22023	-1.10131	-0.704437	-0.824878	-0.836045	-0.639044	-0.609329	-0.610017	-1.31673	-1.47593	-1.26976	-1.07128	-0.940587	-1.14931	-0.872749	-0.932192	-0.884999	-0.991231	-1.06383	-0.85611	-0.683982	-0.660682	-0.743031	-0.458793	-0.585518	-0.395232	-1.12489	-0.788453	-0.619463	-1.35414	-1.05372	-0.896647	-0.970391	-0.695898	-0.479848	0.490544	0.00399646	0.274493	0.0114441		0.457494	0.00149565	0.300416	0.0296969		0.505431	0.000781538	0.336441	0.0147785
1.40742	1.43225	1.31345	1.22696	1.36531	1.15972	0.903736	0.965713	1.02677	1.43308	1.41813	1.43855	1.32958	1.15237	1.39579	1.09724	1.0828	1.07725	1.1036	1.25985	1.17345	1.1293	1.22297	0.830453	0.831914	0.792541	0.976926	1.38437	1.25066	0.965405	1.42992	1.29258	1.08576	1.17896	1.06091	0.867127	-0.311837	0.00936818	-0.118055	0.407863		-0.344158	0	-0.137338	0.120582		-0.418969	0.00141574	-0.133711	0.128552
-2.17271	-1.77091	-1.83883	-1.97789	-1.48189	-1.22605	-1.23729	-1.72171	-1.64908	-0.895831	-0.805529	-1.00916	-1.24768	-1.33145	-1.37758	-0.737306	-1.08306	-0.595704	-0.340979	-0.208841	-0.457276	-0.339103	-0.412719	-0.506101	-0.223164	-0.531979	-0.624797	-1.92748	-1.56194	-1.53603	-0.903508	-1.3189	-0.805357	-0.335699	-0.419308	-0.45998	-0.124281	0.393925	-0.0836091	0.385256		0.098151	0.627882	-0.415395	0.00848558		0.391454	0.0651122	0.365537	0.221976
0.455404	0.0733659	0.361935	0.303866	0.0759153	0.308179	0.36461	0.290986	0.383338	-0.407404	-0.0770221	0.318958	0.393282	0.0690601	0.54721	0.586298	0.804848	0.577198	-0.477393	-0.433857	-0.507031	0.627805	0.721566	0.802998	0.545607	0.652789	0.659913	0.296902	0.22932	0.346311	-0.0551561	0.336517	0.656115	-0.47276	0.717456	0.619436	1.0922	0	1.19022	0		0.711271	0.0143614	0.391673	0.180374		0.0494095	0.799264	-0.0675813	0.733605
0.73746	0.777121	0.75861	0.470863	0.455759	0.444196	-0.0401571	-0.0857141	-0.175673	1.031	1.00885	1.08858	0.84639	0.692828	0.577591	-0.0864196	0.154045	0.235463	1.02235	1.24992	1.24946	0.497618	0.720897	0.40554	0.428514	0.299231	0.413767	0.75773	0.45694	-0.100515	1.04281	0.705603	0.10103	1.17391	0.541352	0.380504	-0.793407	0.00130128	-0.632559	0.00675377		-0.941779	0.000717729	-0.337206	0.0192538		-0.858245	0	-0.300791	0.00259459
-2.27441	-2.7409	-2.65215	-2.84981	-2.19791	-2.1826	-1.71068	-1.85601	-1.77333	-2.44507	-2.5658	-2.34753	-2.37937	-1.78155	-2.17737	-1.4607	-1.4274	-1.48009	-1.98584	-1.66455	-1.48626	-1.87591	-1.86313	-1.83504	-1.82985	-2.4126	-1.92677	-2.55582	-2.41011	-1.78001	-2.4528	-2.11276	-1.45606	-1.71222	-1.85803	-2.05641	-0.344188	0.136257	-0.145811	0.367968		0.996738	0.000254335	0.340039	0.129151		0.775812	0.00432717	0.145714	0.689977
3.53063	3.5059	3.64999	3.62328	3.43127	3.54323	3.17663	3.02533	3.23575	3.59147	3.47812	3.57556	3.45146	3.61792	3.38339	3.14046	2.89849	3.13049	3.76481	3.65277	3.77496	3.74023	3.66659	3.59175	3.34848	3.30759	3.27145	3.56217	3.53259	3.1459	3.54838	3.48426	3.05648	3.73085	3.66619	3.30917	-0.421671	0.00117705	-0.0646561	0.303492		-0.491901	0.00271518	-0.0641216	0.491096		-0.416271	0.00380973	-0.0295796	0.782509
-1.2979	-1.4161	-1.26658	-1.13988	-1.0379	-0.971528	-1.02634	-0.960658	-1.05918	-1.04115	-1.24797	-0.974931	-0.747423	-0.525652	-0.724249	-0.673761	-0.748821	-0.703368	-1.63525	-1.42926	-1.39756	-1.34387	-0.961606	-1.0326	-0.94294	-1.12907	-1.0401	-1.32686	-1.04977	-1.01539	-1.08802	-0.665774	-0.70865	-1.48736	-1.11269	-1.03737	0.44999	0.00700865	0.374666	0.0387594		0.379367	0.00570882	0.422242	0.0218057		0.311468	0.00313438	0.277092	0.0229016
-1.35706	-1.33593	-1.06544	-0.731328	-0.788888	-0.470501	-1.07586	-1.05684	-0.906362	-1.15454	-1.41817	-1.12345	-0.629491	-0.419399	-0.439978	-0.646263	-0.967403	-0.952661	-2.11993	-1.85641	-1.51981	-0.473315	-0.763628	-0.613333	-0.809604	-0.973934	-1.00403	-1.25281	-0.663572	-1.01302	-1.23205	-0.496289	-0.855442	-1.83205	-0.616758	-0.92919	0.902858	0.00689386	1.21529	0.00532361		0.376609	0.0242746	0.735762	0.00754047		0.239791	0.049455	0.58924	0.0209383
-0.485912	-0.618939	-0.468503	-0.36329	-0.457371	-0.333408	-0.430227	-0.215998	-0.485578	-0.316484	-0.380801	-0.335469	-0.509738	-0.20786	-0.380983	-0.626932	-0.477843	-0.461499	-0.23514	-0.218865	-0.403188	-0.890369	-0.855779	-0.846767	-0.557711	-0.652046	-0.576834	-0.524451	-0.38469	-0.377268	-0.344251	-0.366194	-0.522092	-0.285731	-0.864305	-0.595531	-0.3098	0.00732658	-0.578574	0.00176369		-0.17784	0.014776	-0.0219422	0.880463		0.147184	0.11869	0.139761	0.0837509
-0.619349	-0.889561	-0.528785	-1.38659	-1.46447	-1.98704	-0.895487	-1.59403	-1.26188	-0.983121	-1.3371	-0.891145	-1.96791	-1.70438	-1.56228	-1.331	-1.48052	-1.02403	-2.90859	-2.69458	-2.1908	-1.52944	-1.51065	-1.2942	-1.75547	-1.11444	-1.51516	-0.679232	-1.6127	-1.25047	-1.07045	-1.74486	-1.27851	-2.59799	-1.44476	-1.46169	1.1363	0.0110902	1.15323	0.00709011		-0.20806	0.223557	-0.674404	0.024102		-0.571235	0.0355306	-0.933468	0.02137
0.470154	0.469499	0.501295	0.749594	0.635128	0.633119	0.649041	0.62817	0.625582	0.504438	0.488803	0.358655	0.648732	0.691905	0.765466	0.668603	0.704436	0.68305	0.469198	0.532946	0.500403	1.05928	0.887198	1.19514	0.968887	0.819439	0.814692	0.480316	0.672614	0.634265	0.450632	0.702034	0.685363	0.500849	1.04721	0.867672	0.366823	0.00277261	0.546358	0.00599259		0.234731	0.0044426	0.251402	0.0169741		0.153948	0.000350154	0.192298	0.0168662
[truncated: 6,302 more rows]

## Sheet: Fig. 3D
		WT				alpha KO				Beta KO
	Gene name	Fold change	Student's T-test q-value		Gene name	Fold change	Student's T-test q-value		Gene name	Fold change	Student's T-test q-value
	PPIP5K2	-0.137818	0.01525		PPIP5K2	0.051136	0.34569		PPIP5K2	0.0123609	0.90615
	CDC42BPA	-0.202462	0.00652		CDC42BPA	-0.0906207	0.03303		CDC42BPA	-0.14761	0.00681
[truncated: 145 more rows]

## Sheet: Fig. 4A 1 day
		WT				alpha KO				Beta KO
[truncated: 61 more rows]

## Sheet: Fig. 4A 4 days
		WT				alpha KO				Beta KO
[truncated: 61 more rows]

[truncated: 4 more sheets: Fig. 4C, Fig3–FigSuppl1, Fig4–FigSuppl1A 1 day, Fig4–FigSuppl1A 4 days]
